# Supplementary material for: Extent of gross underestimation of precipitation in India
Source: Copernicus journal article supplement (doi:10.5194/hess-2024-18), 2024-01-25

# Supplement to ‘Extent of gross underestimation of precipitation in India’

---

The following is an overview of the summary graphics and tables included in this supplement.

- Correction factors based on PBCOR
- Precipitation
  - Average annual precipitation, WY 2007-2014
    - \* Maps of gridded average annual precipitation for each product
    - \* Ratio of IMD and other products by river basin
  - Select Flooding Events
    - \* Assam flooding, June 2012
    - \* Jammu and Kashmir flooding, September 2014
    - \* Kerala flooding, August 2018
  - Time series of basin-averaged precipitation and trends
- Evapotranspiration
  - GLEAM versus NTSG, comparison of basin-averaged values
- Effect of different heuristics on Scenario II
- Annual Changes in Terrestrial Water Storage (TWS)
- Time series charts
  - Time series of hydrometeorological data for each of the 73 off-balanced watersheds identified in this study using the IMD-APHRO dataset

---

The following is an overview of the tabular data included with this supplement.

- Streamflow gauging stations 242 gauging stations used in this study (CSV file, ‘stations\_all.txt’); attributes include:
  - ghi\_stn\_id : Unique ID used to identify a station, 10 characters long, similar to GHI
  - disp\_basin : Complete name of the River Basin
  - st : State associated with the station, CWC
  - site\_name : Name of the station, CWC
  - riv\_name : River/tributary, CWC

- `drai_area` : Catchment drainage area (sq km), CWC
- `shpArea_wgs` : Catchment drainage area (sq km), estimated in this study, similar to GHI
- `stn_lat` : Latitude of the station (decimal degrees), CWC
- `stn_lon` : Longitude of the station (decimal degrees), CWC
- `hydro_lat` : Latitude of the relocated station (decimal degrees), similar to GHI
- `hydro_lon` : Longitude of the relocated station (decimal degrees), similar to GHI
- List of 73 unbalanced watersheds identified in this study using the IMD-APHRO dataset (CSV file, ‘stations\_73.txt’); attributes same as ‘stations\_all.txt’
- Annual (WY-based) watershed-averaged hydrometeorological time series (CSV file, ‘hydromet\_annual.txt’); for WY 1980-2019, whenever data is available, for all 242 stations; metrics include:
  - `ghi_stn_id` : Unique ID used to identify a station, 10 characters long, similar to GHI
  - `wyr`: water year
  - `dname`:  $P$  dataset name (one of the 12 used in this study, referred to by the ‘Alias’ used in Table 1 of the paper)
  - `prec_mcm` :  $P$  corresponding to each dataset, in mcm
  - `evap_gleam_mcm`,  $ET$  from GLEAM, in mcm
  - `flow_mcm_obs`, observed  $R$ , in mcm
  - `cgros`: annual cumulative maximum gross storage capacity, in mcm
  - `clive`: annual cumulative maximum live storage capacity, in mcm

---

The following is an overview of the **GIS data** included with this supplement.

- GIS data on catchment boundaries of the 242 gauging stations (zip file, ‘gis\_watersheds.zip’)
- GIS data on catchment boundaries of major river basins (zip file, ‘basin\_bounds.zip’)

## S1 PBCOR Correction Factors

(a) Ratio of PBCOR (CHELSA V1.2) and IMD

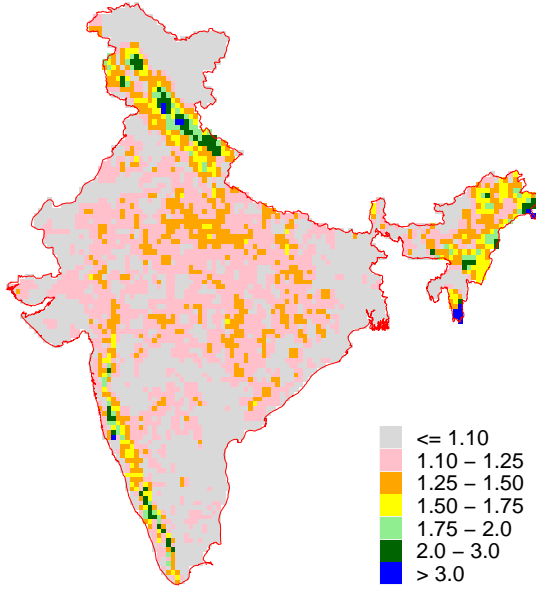

(b) Ratio of PBCOR (CHPclim V1) and IMD

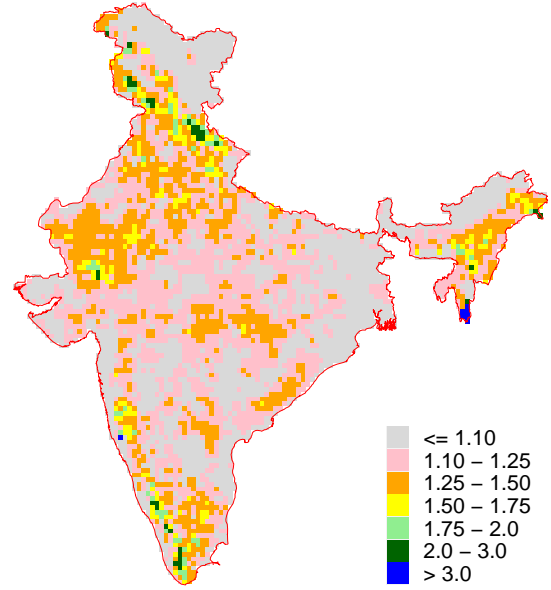

(c) Ratio of PBCOR (WorldClim V2) and IMD

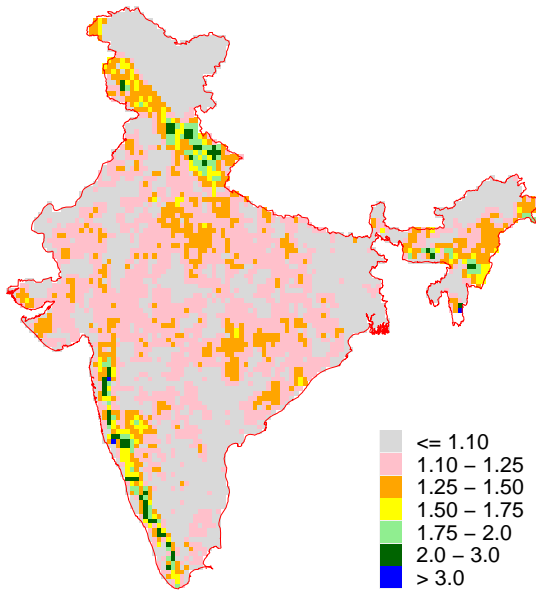

Figure S1: Ratio of bias-corrected annual  $P$  from PBCOR and annual  $P$  from IMD.

## S2 Precipitation Products

### S2.1 Average Annual Precipitation, WY 2007-2014

APHRO, WY 2007–2014, Average Precipitation (mm/year)

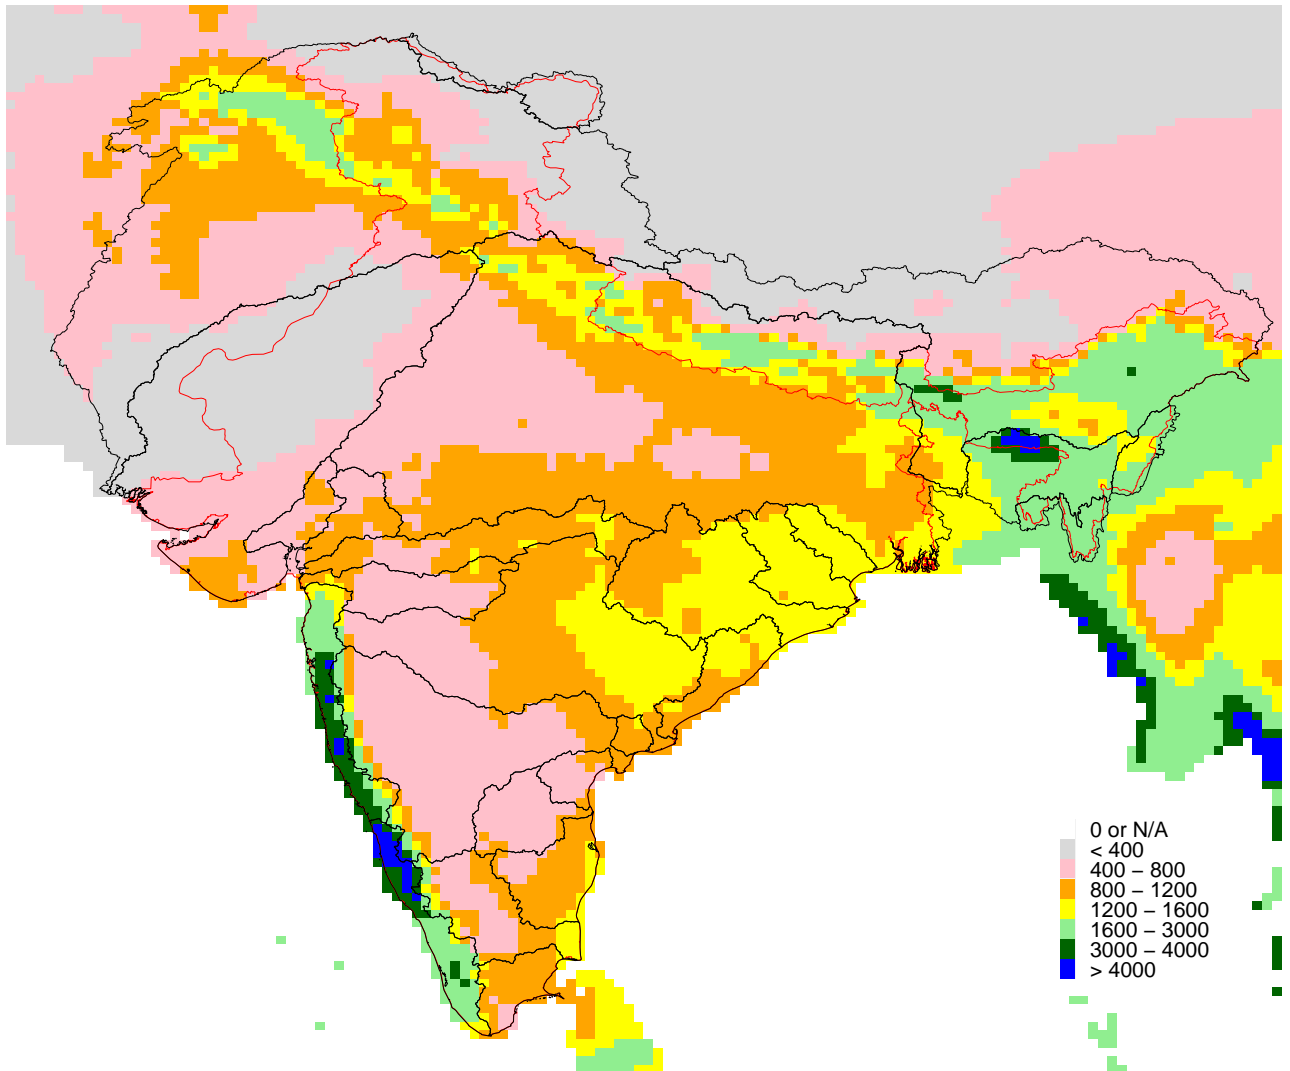

Figure S2: Annual average precipitation from APHRO.



CHIRPS, WY 2007–2014, Average Precipitation (mm/year)

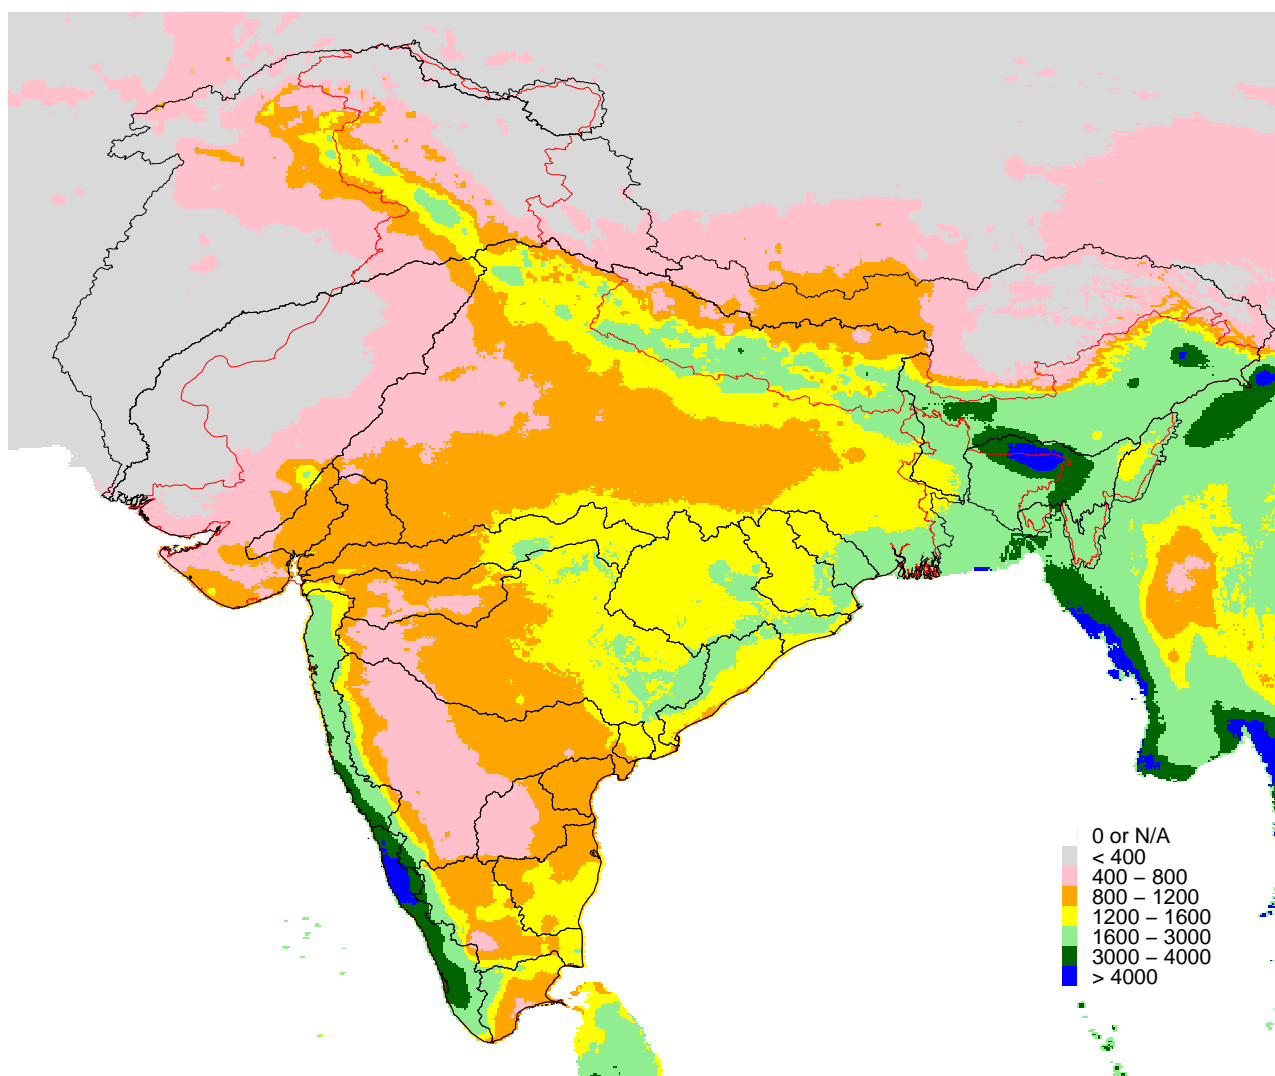

Figure S3: Annual average precipitation from CHIRPS.

CMORPH, WY 2007–2014, Average Precipitation (mm/year)

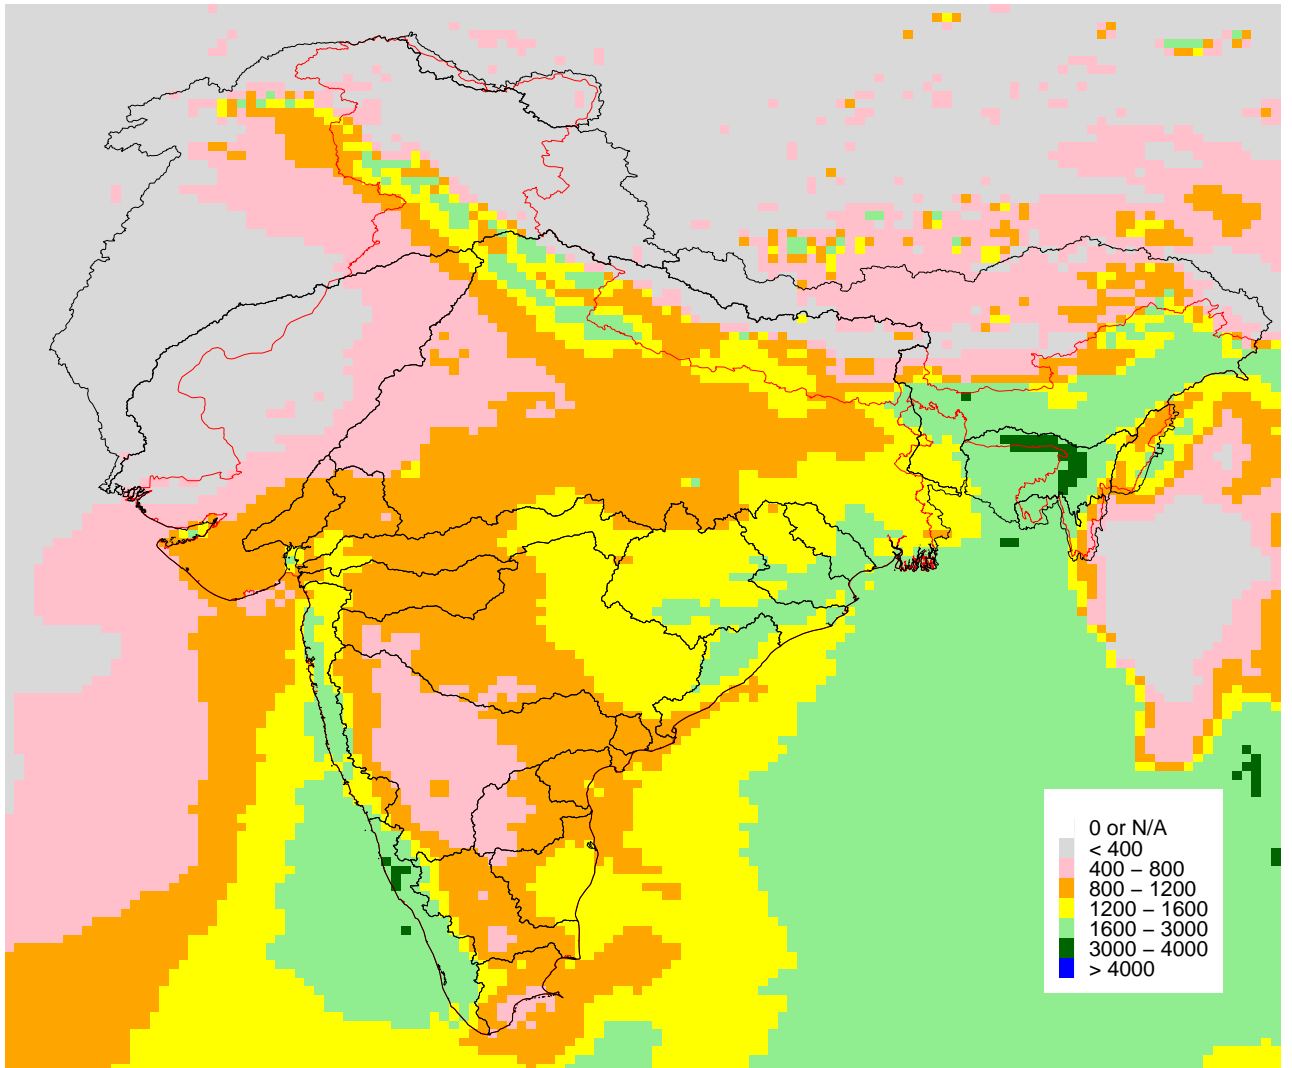

Figure S4: Annual average precipitation from CMORPH.

ERA5, WY 2007–2014, Average Precipitation (mm/year)

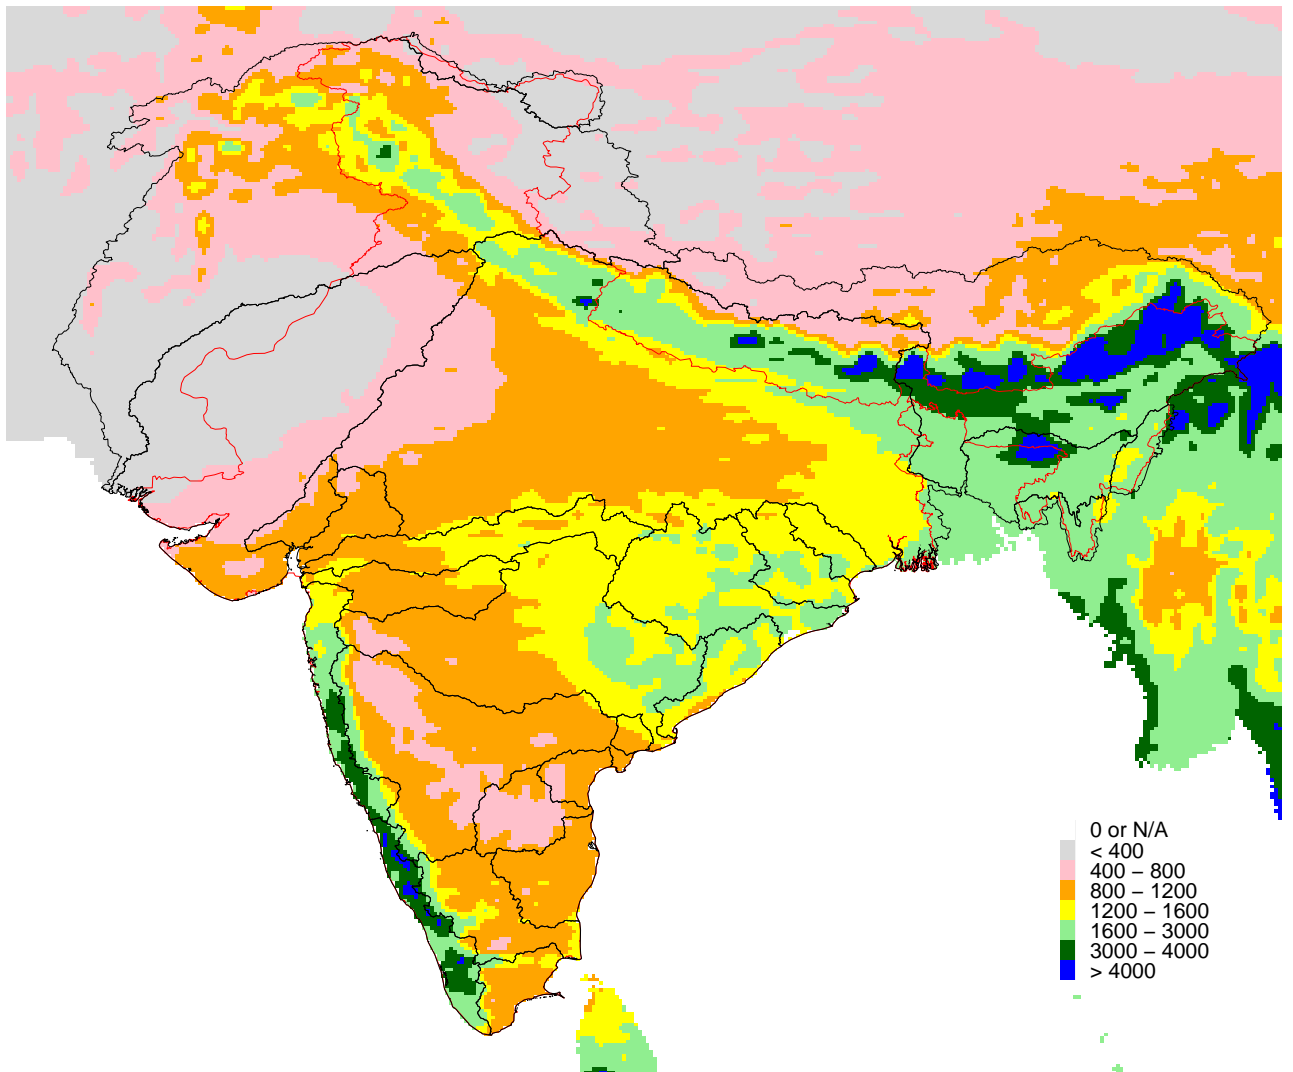

Figure S5: Annual average precipitation from ERA5.

GSMAP, WY 2007–2014, Average Precipitation (mm/year)

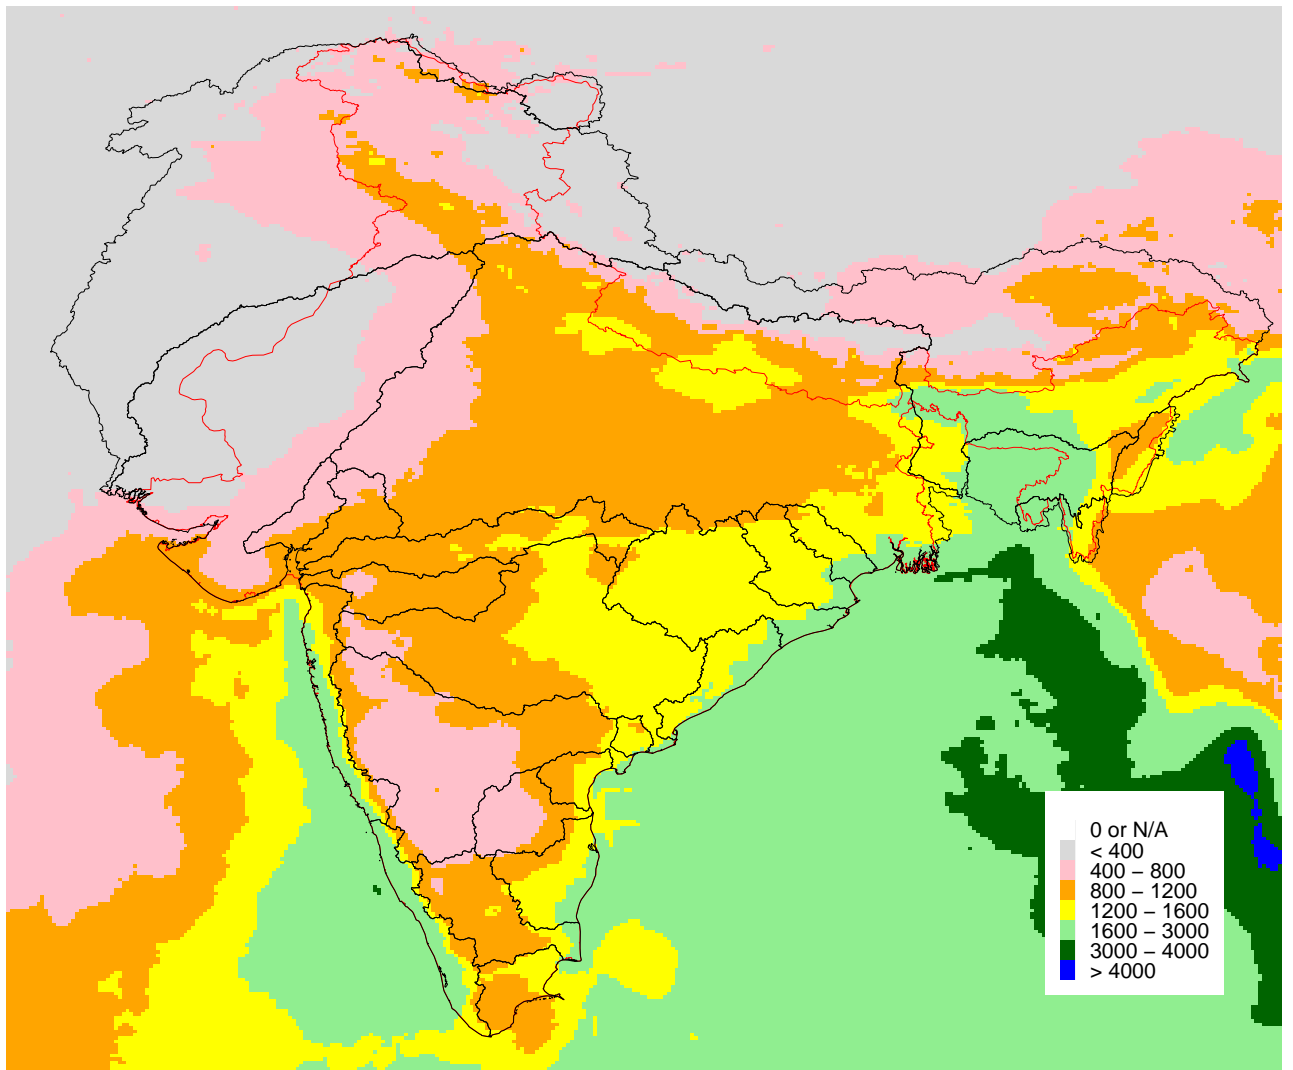

Figure S6: Annual average precipitation from GSMAP.

IMD, WY 2007–2014, Average Precipitation (mm/year)

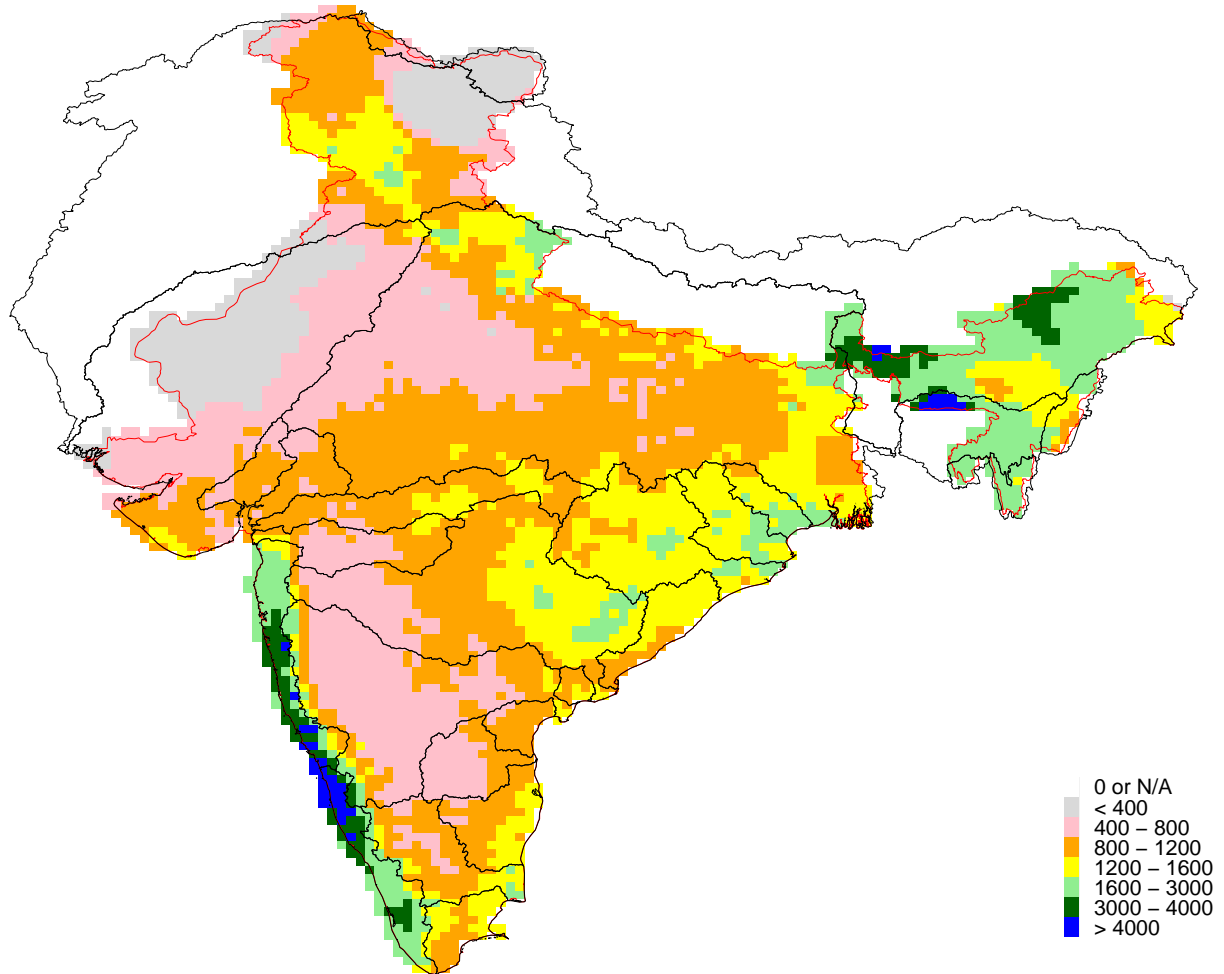

Figure S7: Annual average precipitation from IMD.

IMDAA, WY 2007–2014, Average Precipitation (mm/year)

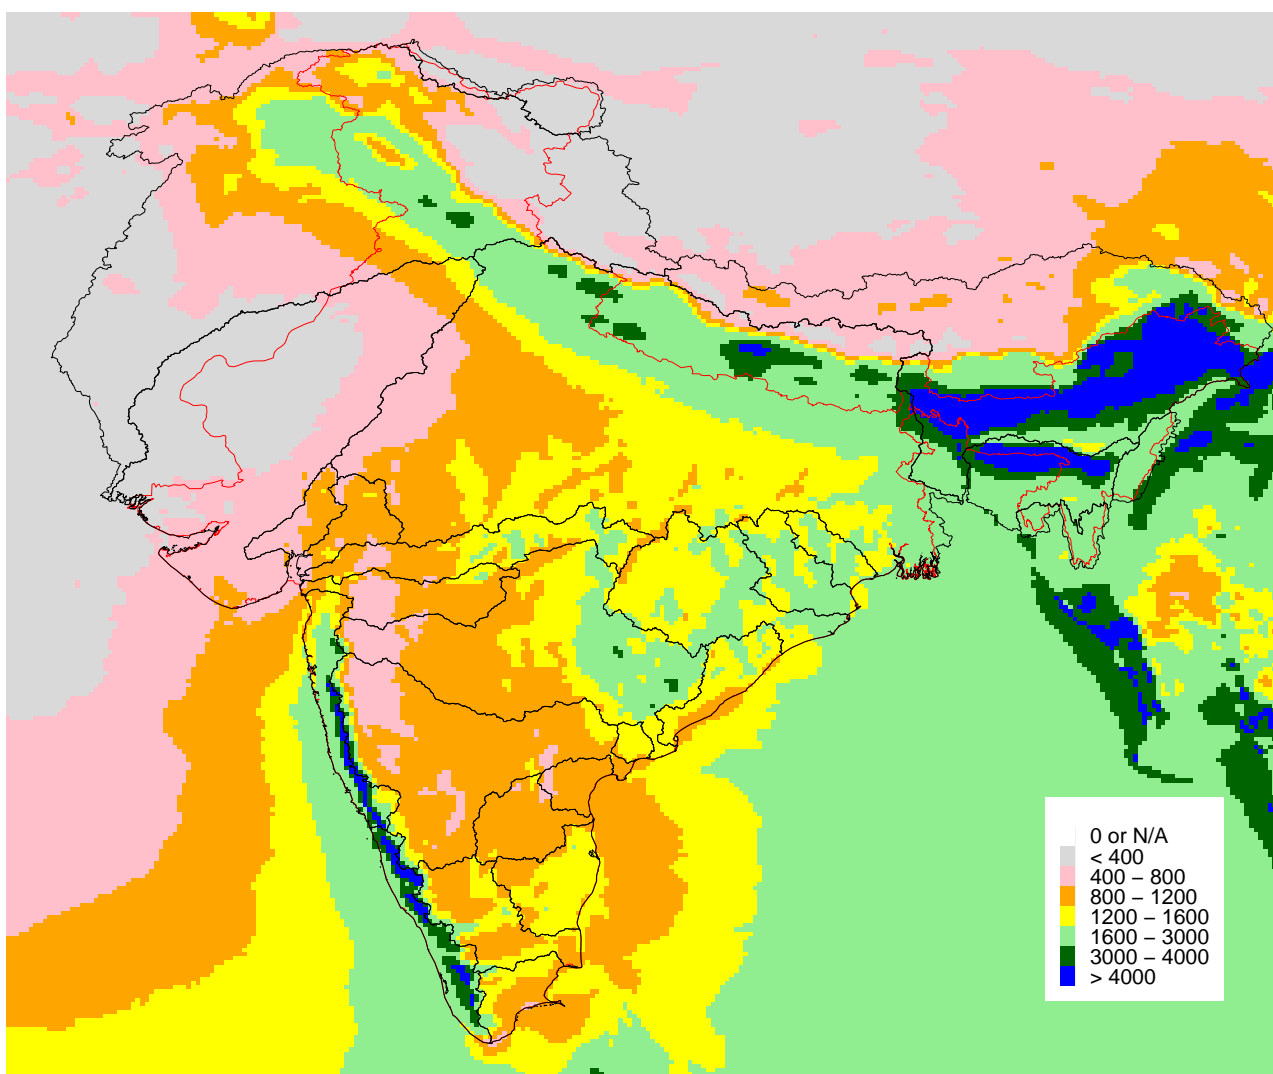

Figure S8: Annual average precipitation from IMDAA.

IMERG, WY 2007–2014, Average Precipitation (mm/year)

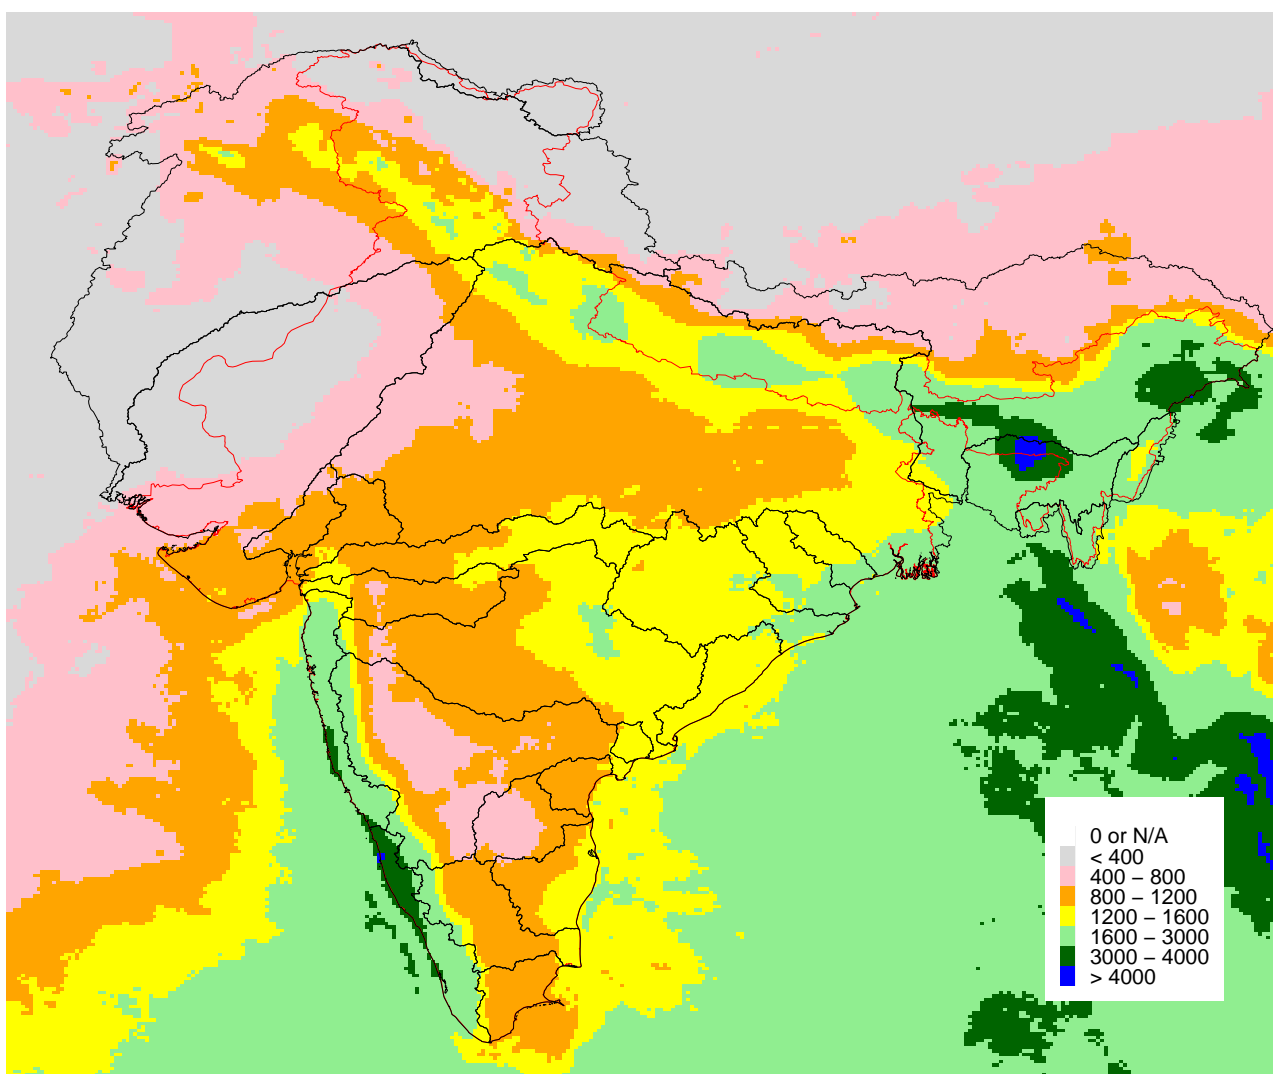

Figure S9: Annual average precipitation from IMERG.

MSWEP, WY 2007–2014, Average Precipitation (mm/year)

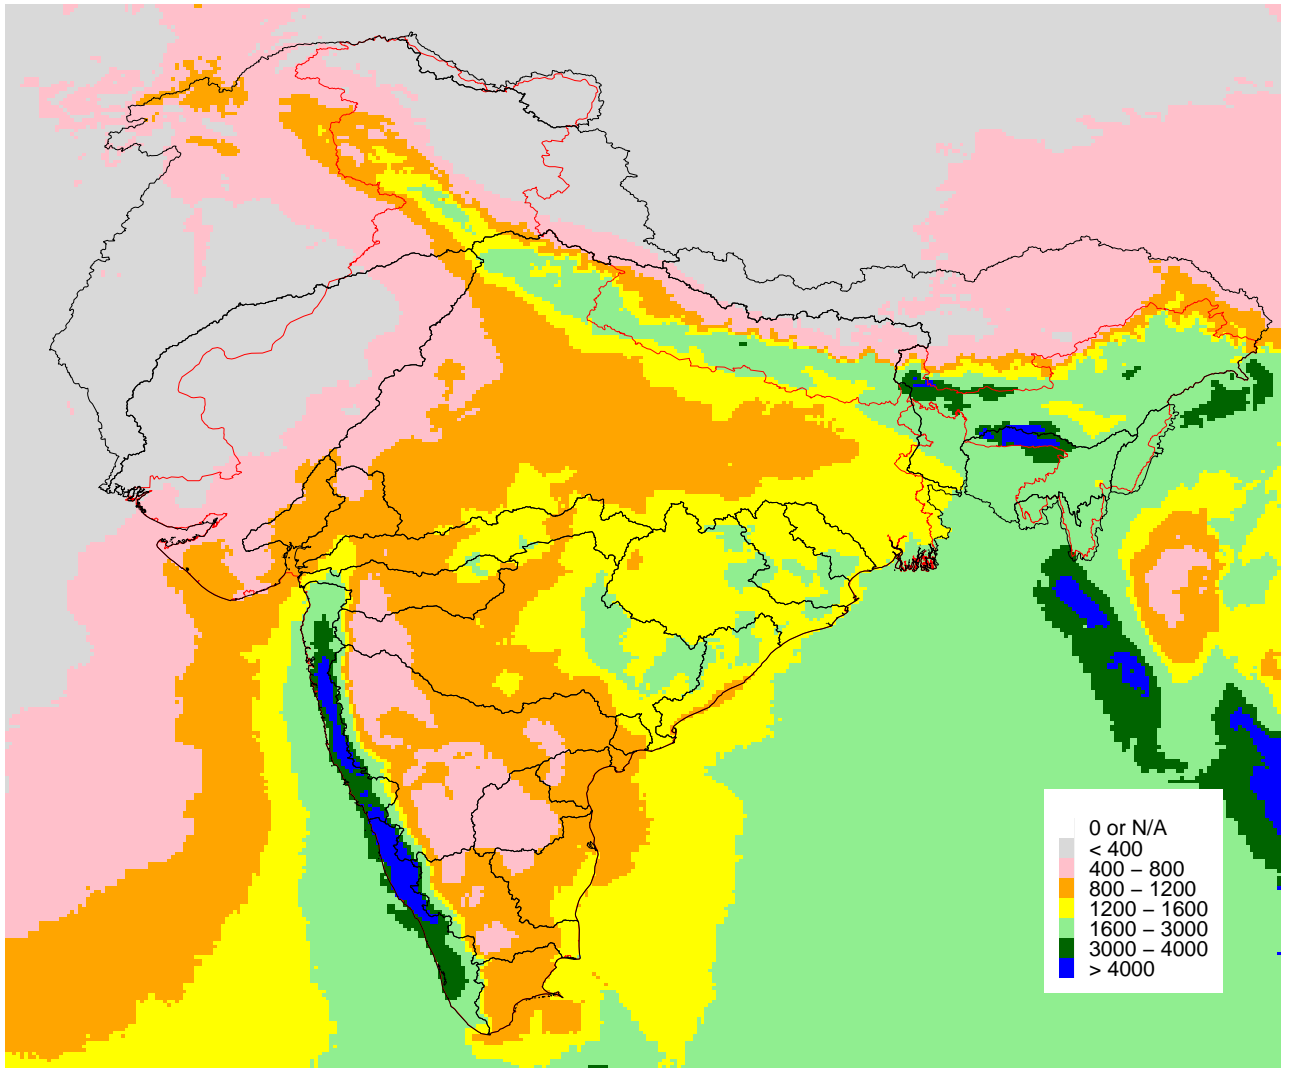

Figure S10: Annual average precipitation from MSWEP.



PERSIANN, WY 2007–2014, Average Precipitation (mm/year)

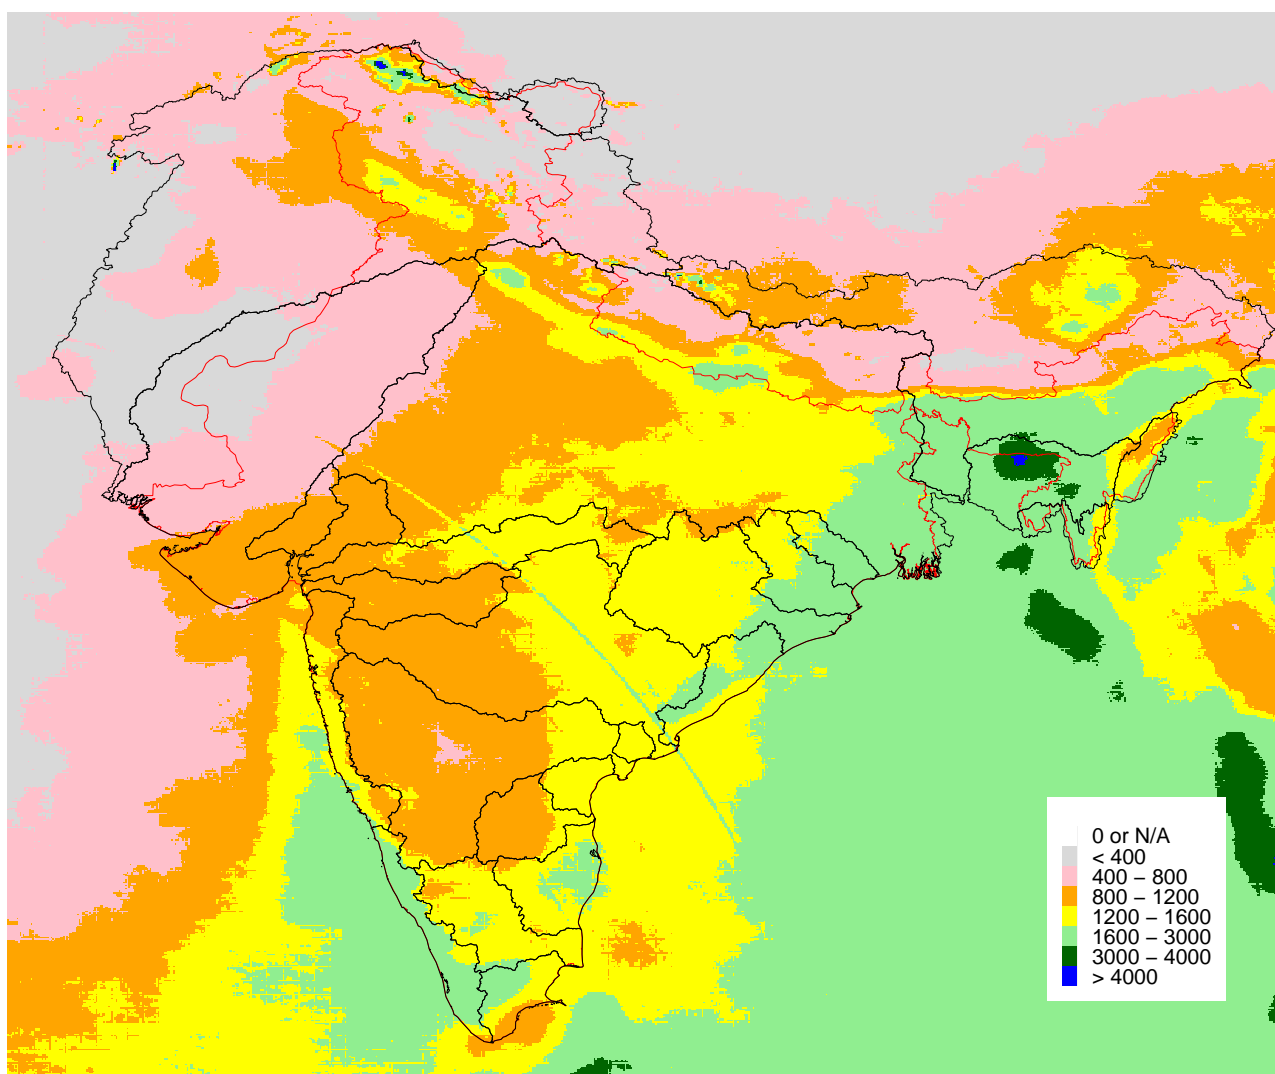

Figure S11: Annual average precipitation from PERSIANN.

SM2RAIN, WY 2007–2014, Average Precipitation (mm/year)

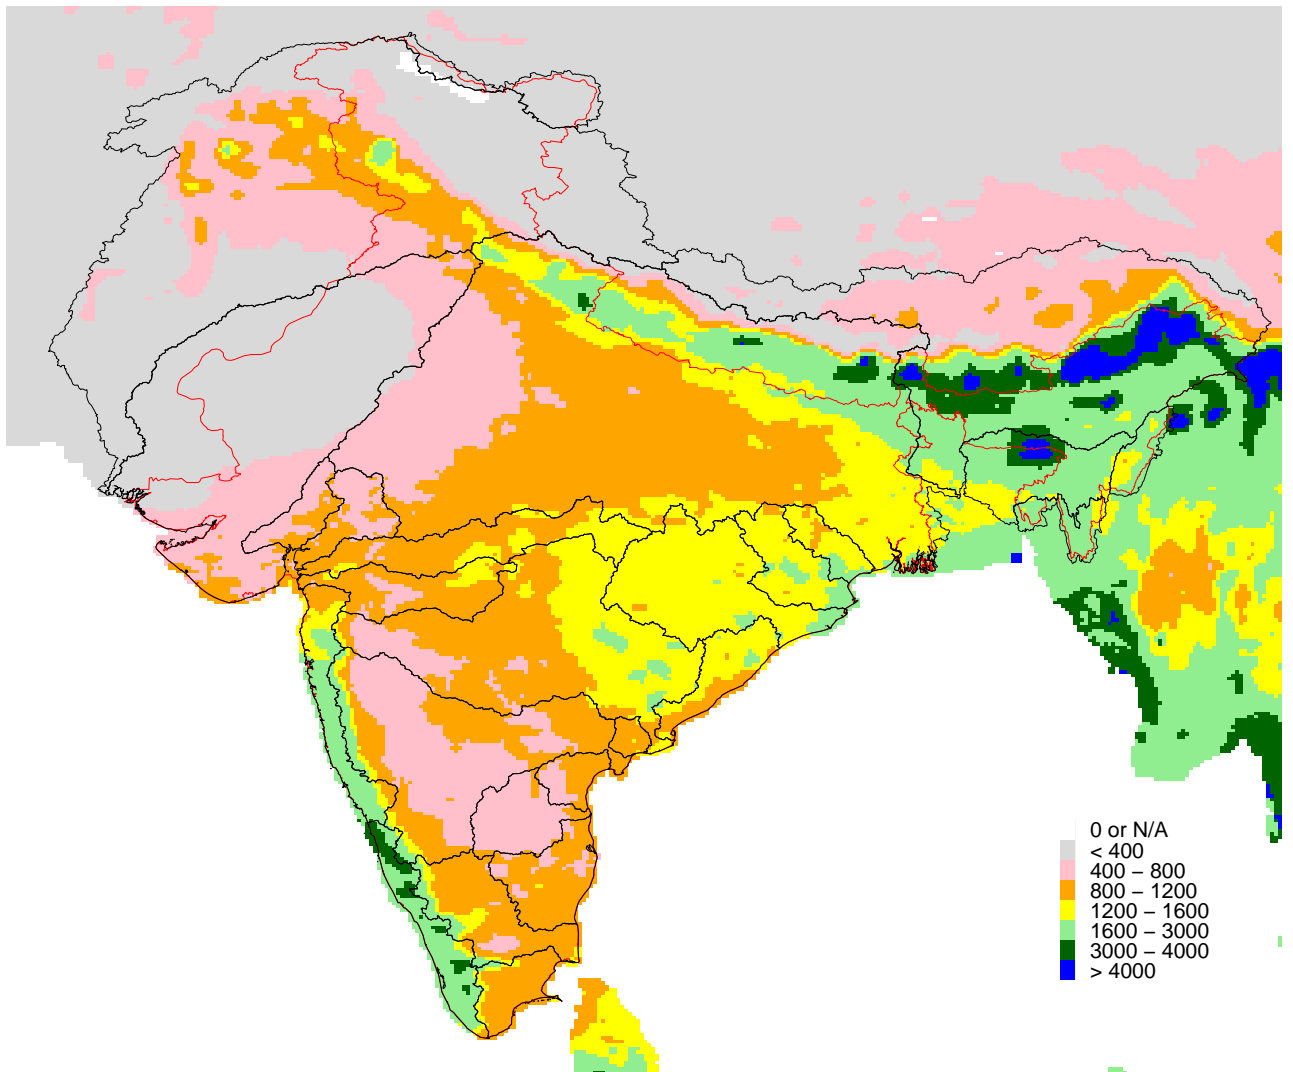

Figure S12: Annual average precipitation from SM2RAIN.

TERRA, WY 2007–2014, Average Precipitation (mm/year)

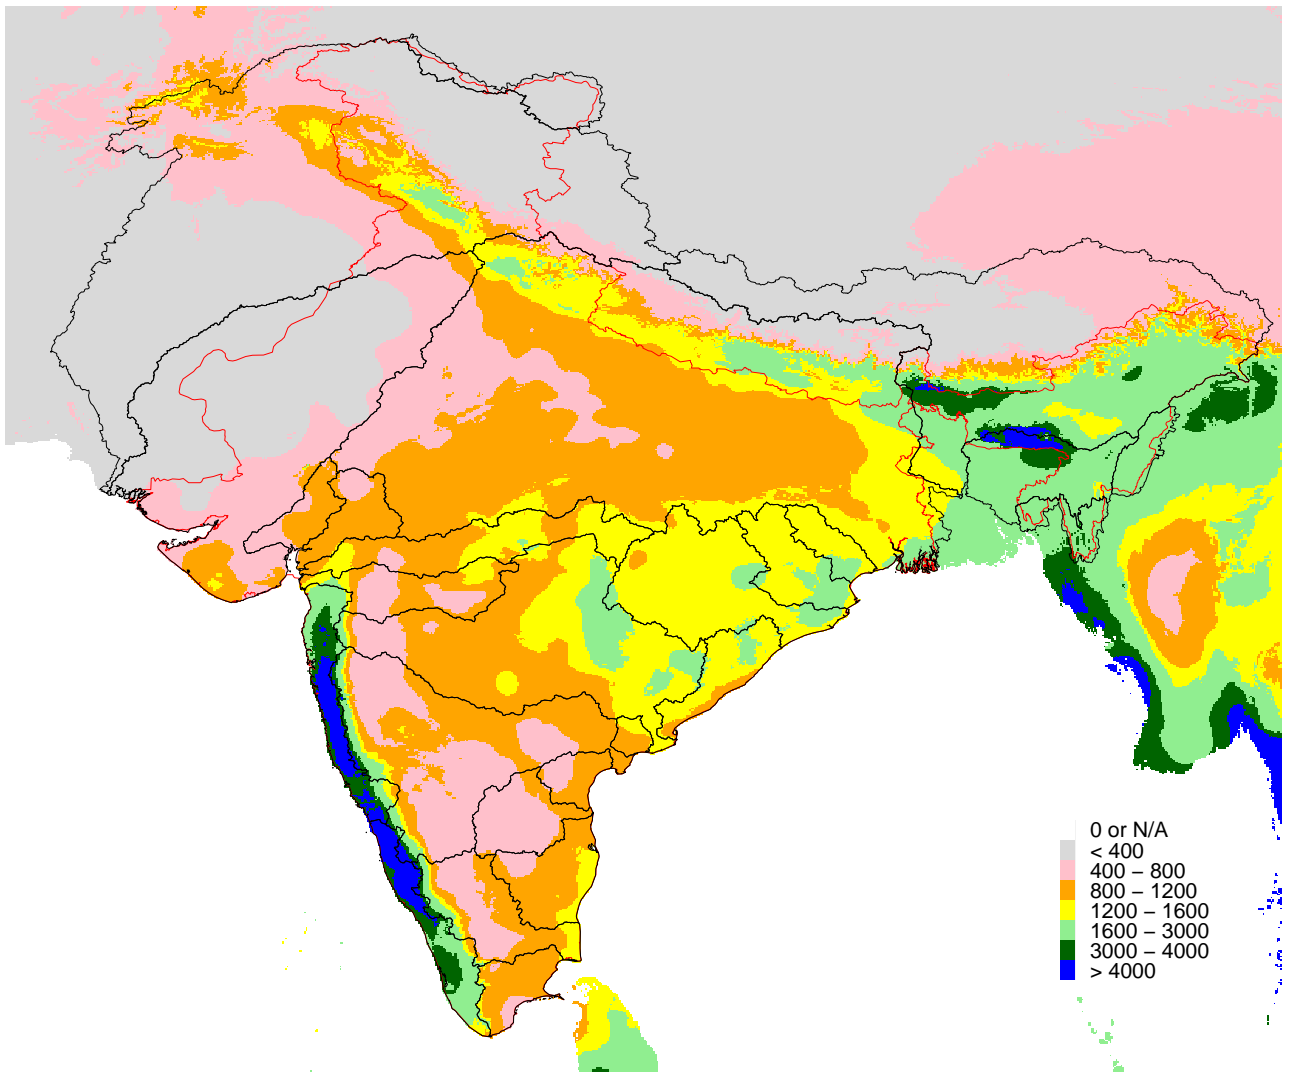

Figure S13: Annual average precipitation from TERRA.

Table S1: Annual  $P$  (mm/year) from IMD for WY 2007-2014, and the ratio of  $P$  from each dataset to  $P$  from IMD. Data is presented for each of the major river basins. The spatial domain is limited to the political boundaries of India where IMD data is available. Basin-scale aggregation of gridded  $P$  was performed only using the grids falling within India's boundaries.

| Basin              | IMD (mm) | APHRO | CHIRPS | CMORPH | ERA5 | GSMAP | IMDAA | IMERG | MSWEP | PERSIANN | SM2RAIN | TERRA |
|--------------------|----------|-------|--------|--------|------|-------|-------|-------|-------|----------|---------|-------|
| All India          | 1,114    | 0.91  | 1.05   | 0.96   | 1.15 | 0.90  | 1.31  | 1.07  | 1.07  | 1.00     | 1.00    | 1.02  |
| Barak              | 2,661    | 0.89  | 1.10   | 0.94   | 0.91 | 0.71  | 1.29  | 1.03  | 1.01  | 0.92     | 0.88    | 1.08  |
| Brahmaputra        | 2,193    | 0.83  | 0.97   | 0.80   | 1.62 | 0.62  | 1.96  | 1.10  | 0.96  | 0.69     | 1.43    | 0.94  |
| Ganga              | 983      | 0.91  | 1.14   | 1.09   | 1.18 | 1.03  | 1.44  | 1.16  | 1.16  | 1.24     | 1.06    | 1.03  |
| Indus              | 886      | 0.82  | 0.71   | 0.60   | 1.07 | 0.67  | 1.33  | 0.76  | 0.68  | 0.90     | 0.53    | 0.59  |
| Minor              | 1,681    | 1.10  | 1.23   | 0.84   | 1.13 | 0.81  | 1.32  | 1.23  | 1.33  | 1.00     | 1.09    | 1.38  |
| North Ladakh       | 424      | 0.63  | 0.39   | 0.28   | 0.73 | 0.88  | 0.48  | 0.12  | 0.40  | 1.03     | 0.18    | 0.07  |
| WFR Kutch          | 514      | 0.89  | 0.99   | 1.03   | 0.92 | 0.87  | 0.97  | 1.09  | 0.93  | 1.20     | 0.81    | 0.89  |
| Brahmani-Baitarani | 1,482    | 0.90  | 1.02   | 1.05   | 1.03 | 0.95  | 1.15  | 1.03  | 1.05  | 1.10     | 0.99    | 1.03  |
| Cauvery            | 1,086    | 0.91  | 1.19   | 0.97   | 1.16 | 0.97  | 1.19  | 1.08  | 1.06  | 1.26     | 1.03    | 0.99  |
| EFR North          | 1,127    | 0.93  | 1.15   | 1.18   | 1.13 | 1.26  | 1.13  | 1.14  | 1.14  | 1.39     | 1.02    | 1.08  |
| EFR South          | 1,110    | 0.89  | 1.11   | 1.02   | 0.94 | 1.15  | 1.14  | 1.00  | 0.96  | 1.36     | 0.87    | 0.92  |
| Godavari           | 1,116    | 0.91  | 1.12   | 1.02   | 1.13 | 1.02  | 1.23  | 1.09  | 1.12  | 1.11     | 1.01    | 1.11  |
| Krishna            | 857      | 0.94  | 1.05   | 1.00   | 1.16 | 0.94  | 1.20  | 1.19  | 1.18  | 1.24     | 1.03    | 1.16  |
| Mahanadi           | 1,343    | 0.93  | 1.12   | 1.10   | 1.13 | 1.04  | 1.16  | 1.09  | 1.11  | 1.12     | 1.06    | 1.08  |
| Mahi               | 865      | 0.91  | 1.14   | 1.11   | 1.10 | 0.99  | 1.11  | 1.14  | 1.09  | 1.17     | 0.92    | 1.07  |
| Narmada            | 1,079    | 0.92  | 1.15   | 1.09   | 1.15 | 1.01  | 1.16  | 1.10  | 1.14  | 1.15     | 1.04    | 1.08  |
| Pennar             | 757      | 0.90  | 1.01   | 1.09   | 1.04 | 1.05  | 1.28  | 1.07  | 0.98  | 1.44     | 0.93    | 0.94  |
| Sabarnati          | 837      | 0.91  | 1.15   | 1.19   | 1.00 | 0.91  | 0.97  | 1.09  | 1.03  | 1.13     | 0.93    | 0.99  |
| Subernarekha       | 1,473    | 0.92  | 1.10   | 1.08   | 0.99 | 1.00  | 1.12  | 1.02  | 1.03  | 1.26     | 0.96    | 0.99  |
| Tapi               | 856      | 0.91  | 1.08   | 1.20   | 1.27 | 1.10  | 1.07  | 1.20  | 1.18  | 1.25     | 1.14    | 1.08  |
| WFR North          | 2,671    | 1.00  | 0.87   | 0.58   | 0.81 | 0.53  | 0.88  | 0.88  | 1.19  | 0.46     | 0.71    | 1.29  |
| WFR South          | 2,906    | 0.99  | 1.07   | 0.76   | 1.01 | 0.59  | 1.06  | 0.91  | 1.23  | 0.68     | 0.87    | 1.16  |

## S2.2 Select Flooding Events

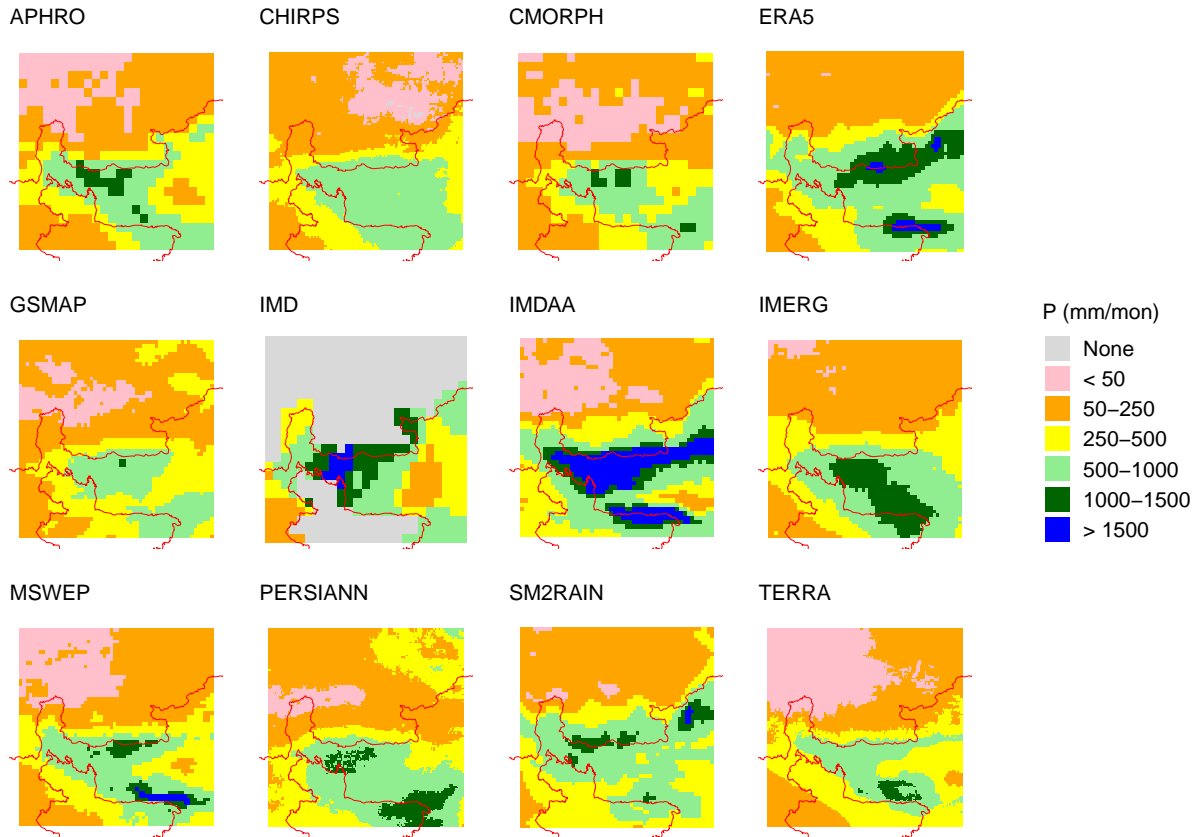

Figure S14: Total monthly  $P$  from various data sources for June 2012. Flooding in the state of Assam (Northeastern India) is the event of interest.

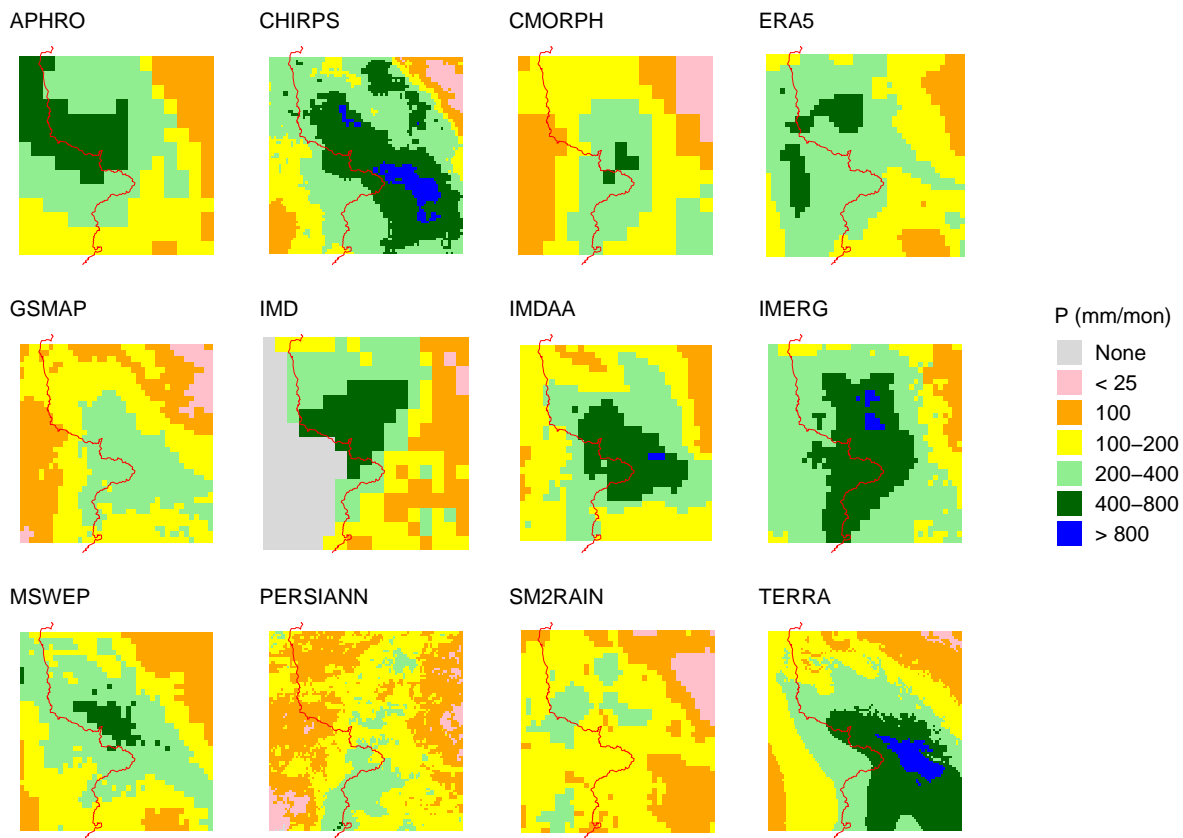

Figure S15: Total monthly  $P$  from various data sources for September 2014. Flooding in the state of Jammu and Kashmir (Northernmost India) is the event of interest.

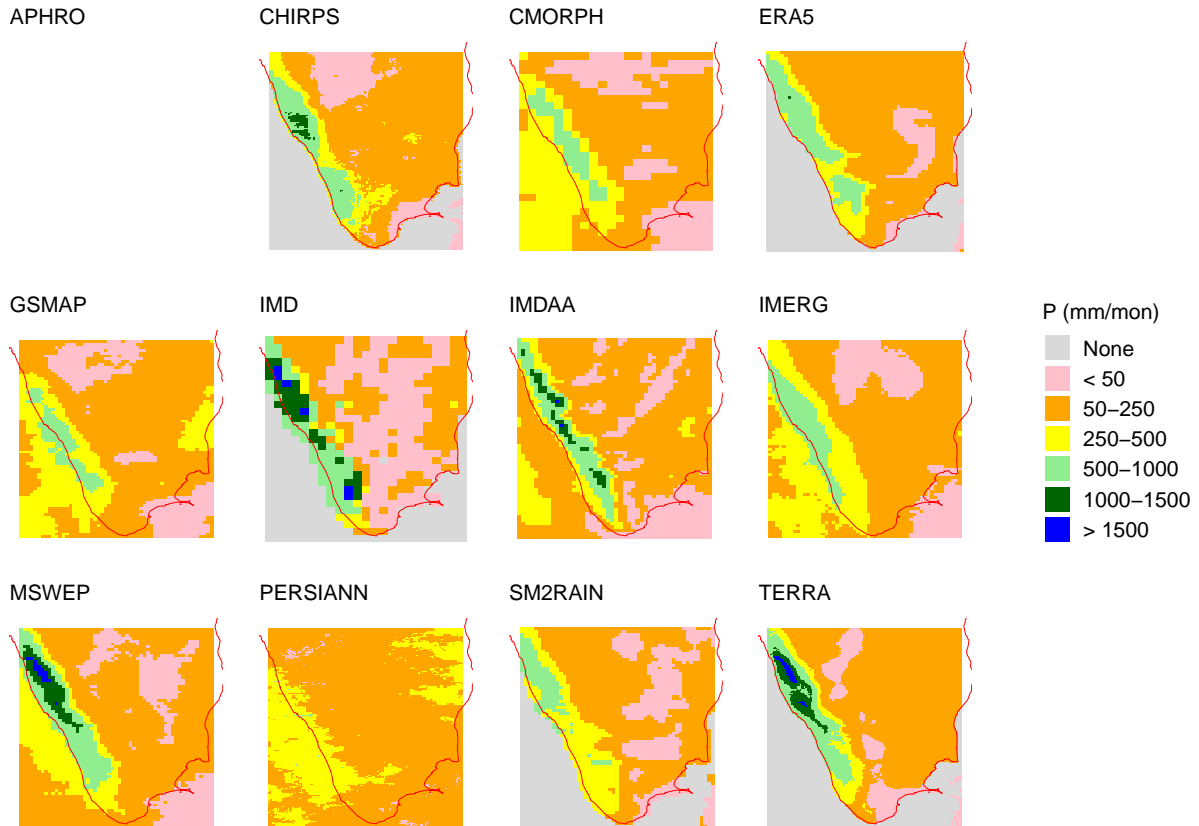

Figure S16: Total monthly  $P$  from various data sources for August 2018. Flooding in the state of Kerala (Southwestern India) is the event of interest. Data from APHRODITE is not available for WY 2018.

## S2.3 Trends in Precipitation

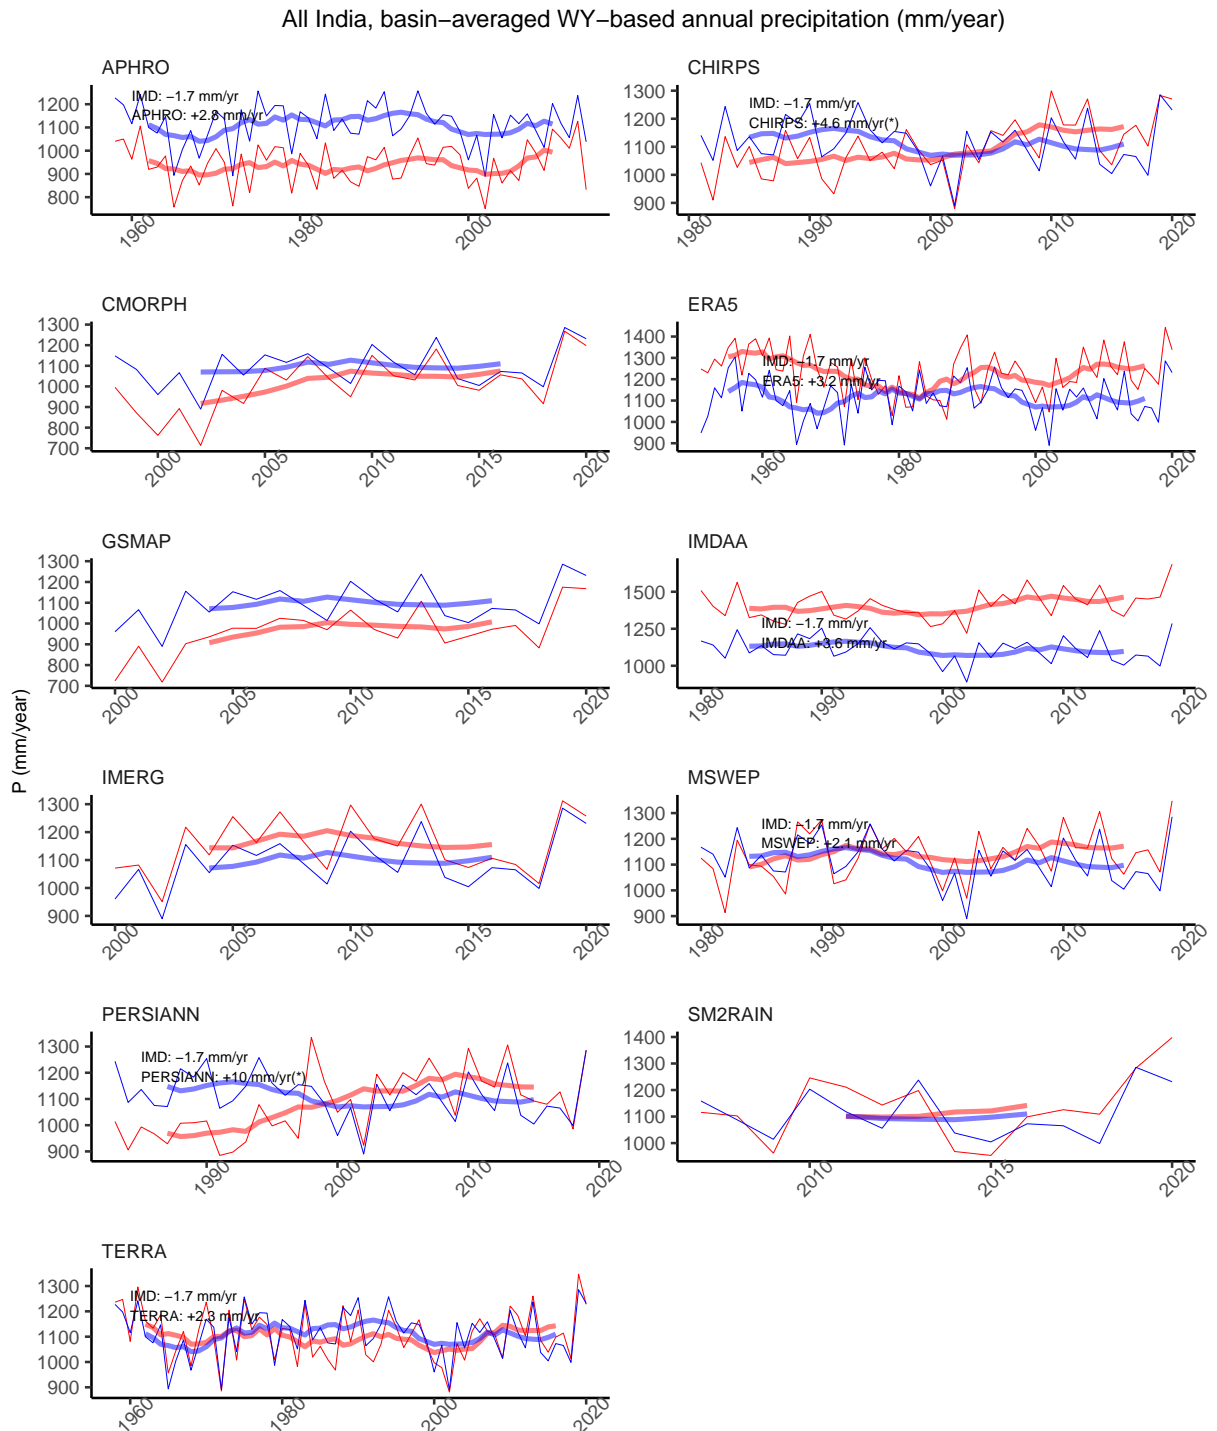

Figure S17: Annual  $P$  across India from IMD (blue) and other datasets (red). 9-year moving average values shown by the thick line. Theil-Sen slope for the period WY 1985-2014 is presented in units of mm/year, with statistically significant values indicated by ‘(\*)’.



# Barak, basin-averaged WY-based annual precipitation (mm/year)

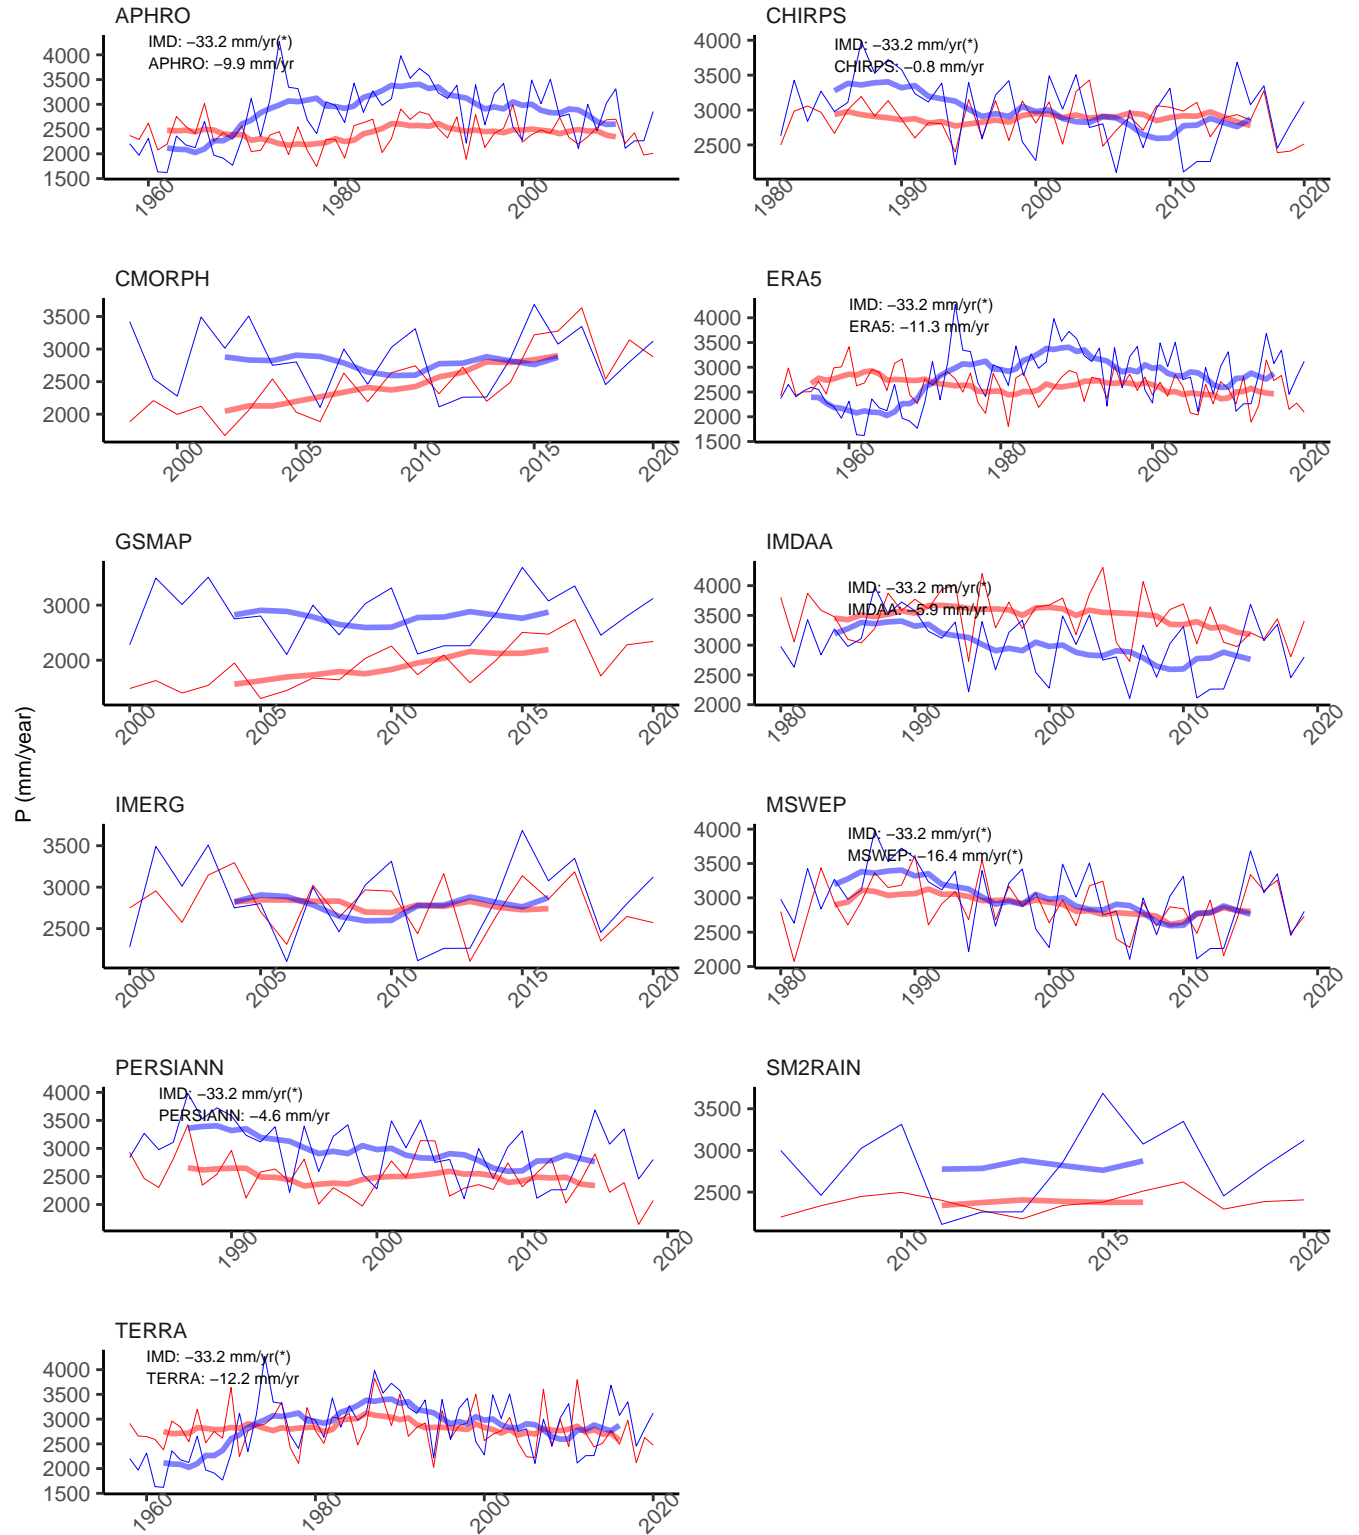

Figure S18: Same as Figure S17, except for the Barak Basin.

# Brahmaputra, basin-averaged WY-based annual precipitation (mm/year)

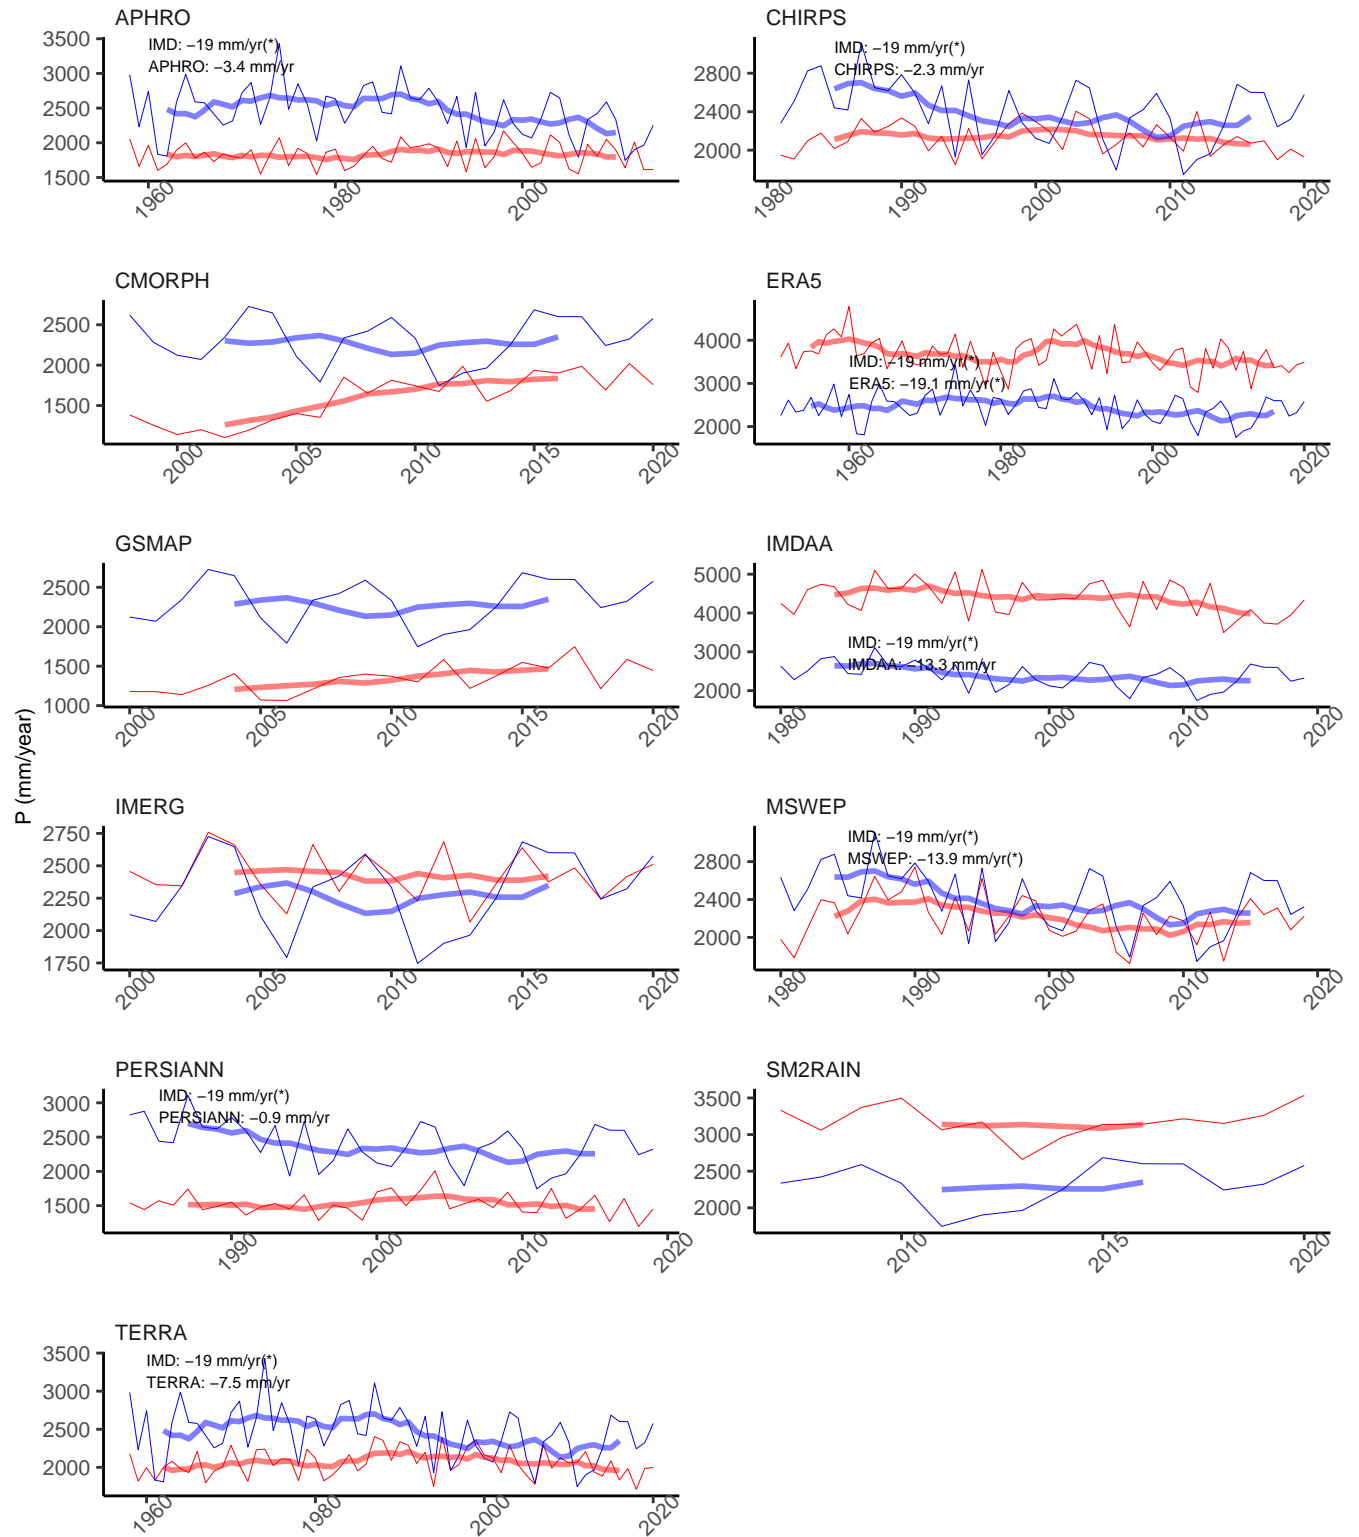

Figure S19: Same as Figure S17, except for the Brahmaputra Basin.

# Ganga, basin-averaged WY-based annual precipitation (mm/year)

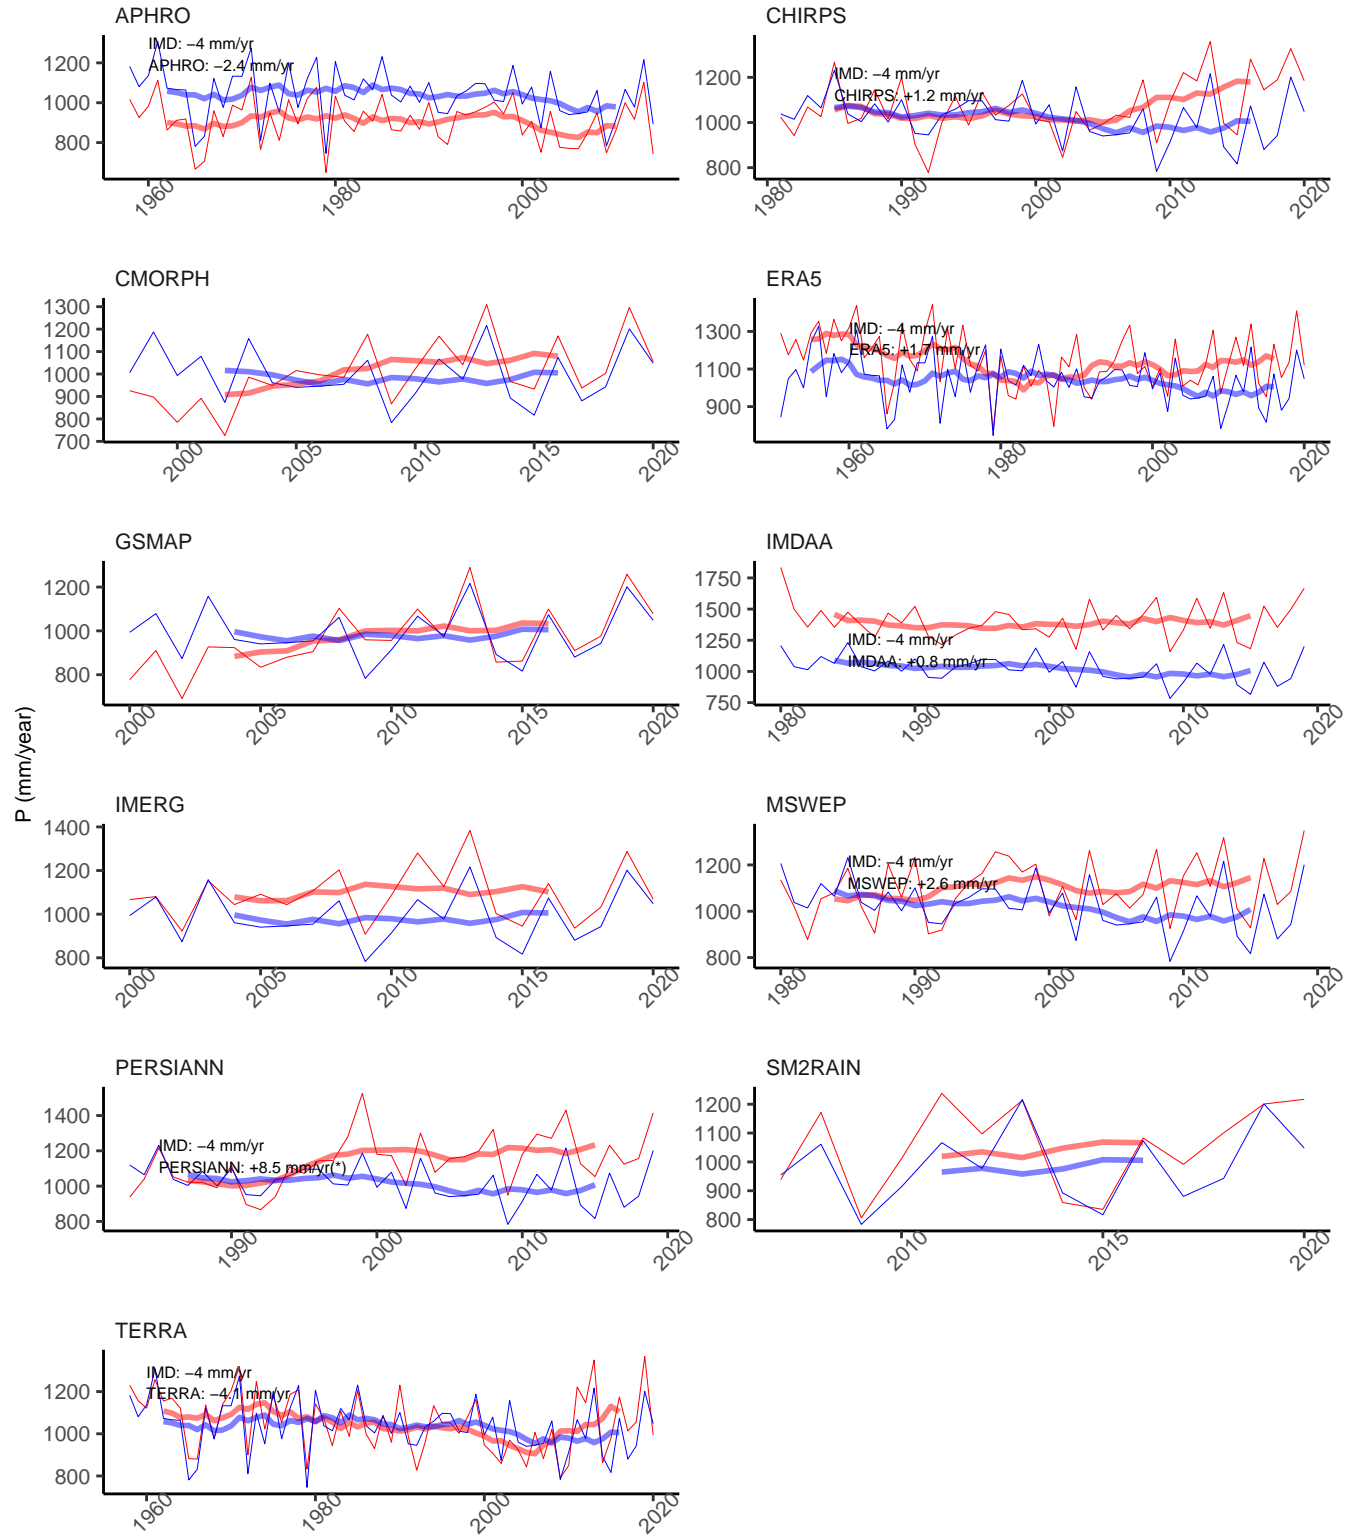

Figure S20: Same as Figure S17, except for the Ganga Basin.

# Indus, basin-averaged WY-based annual precipitation (mm/year)

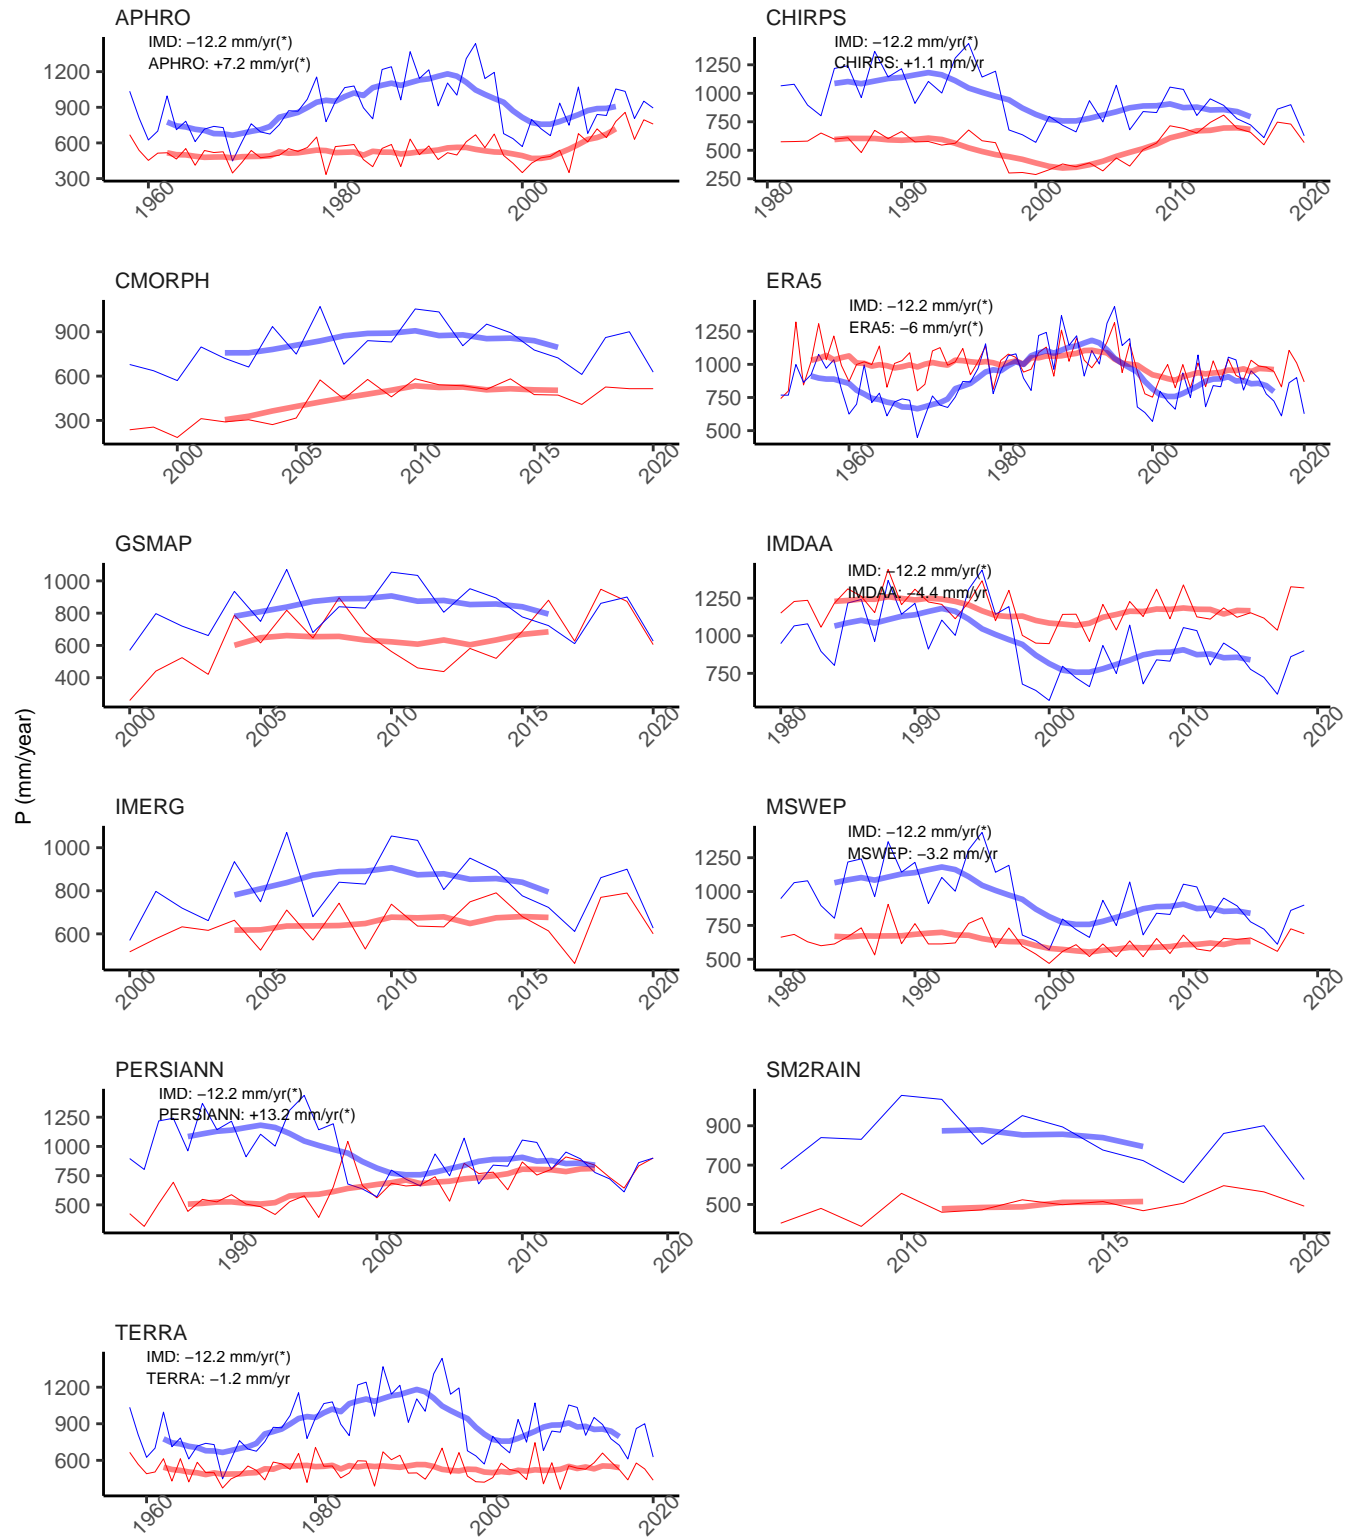

Figure S21: Same as Figure S17, except for the Indus Basin.

# Minor, basin-averaged WY-based annual precipitation (mm/year)

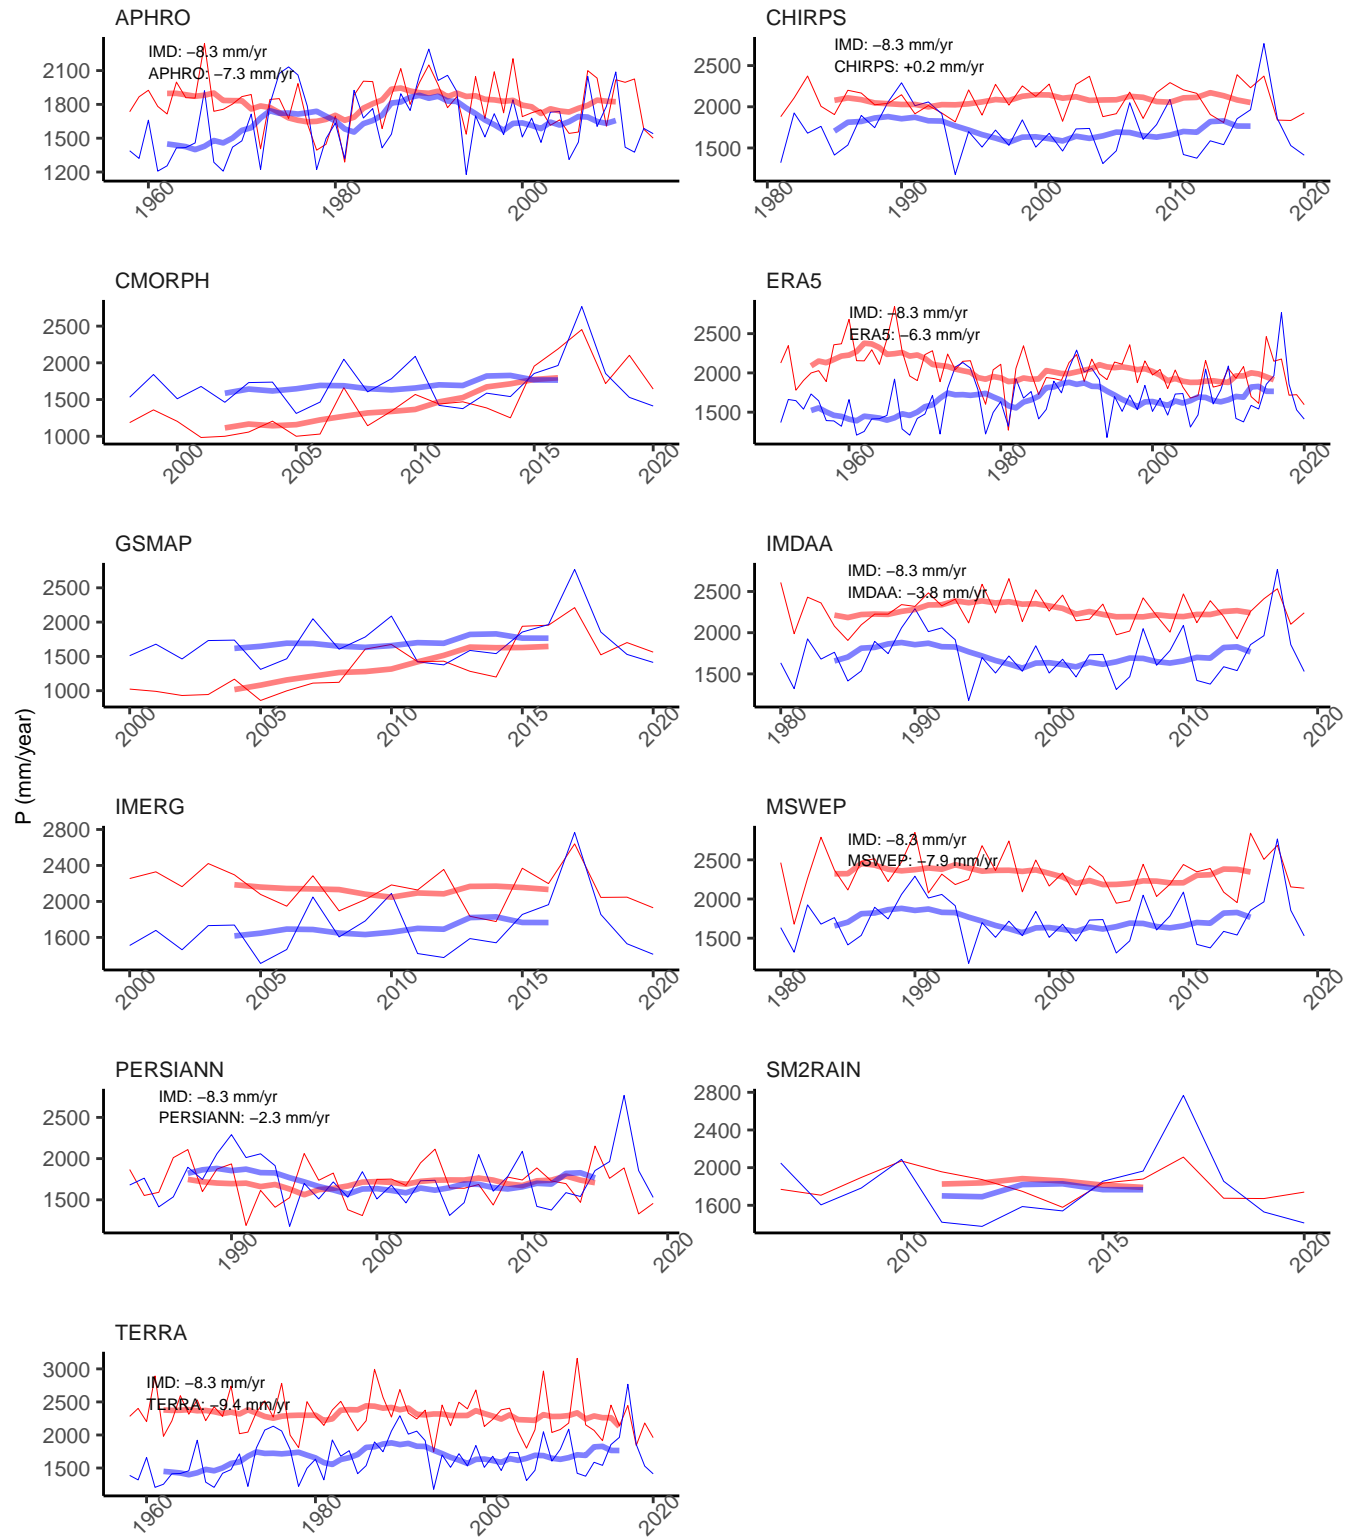

Figure S22: Same as Figure S17, except for the Minor Basin.

# North Ladakh, basin-averaged WY-based annual precipitation (mm/year)

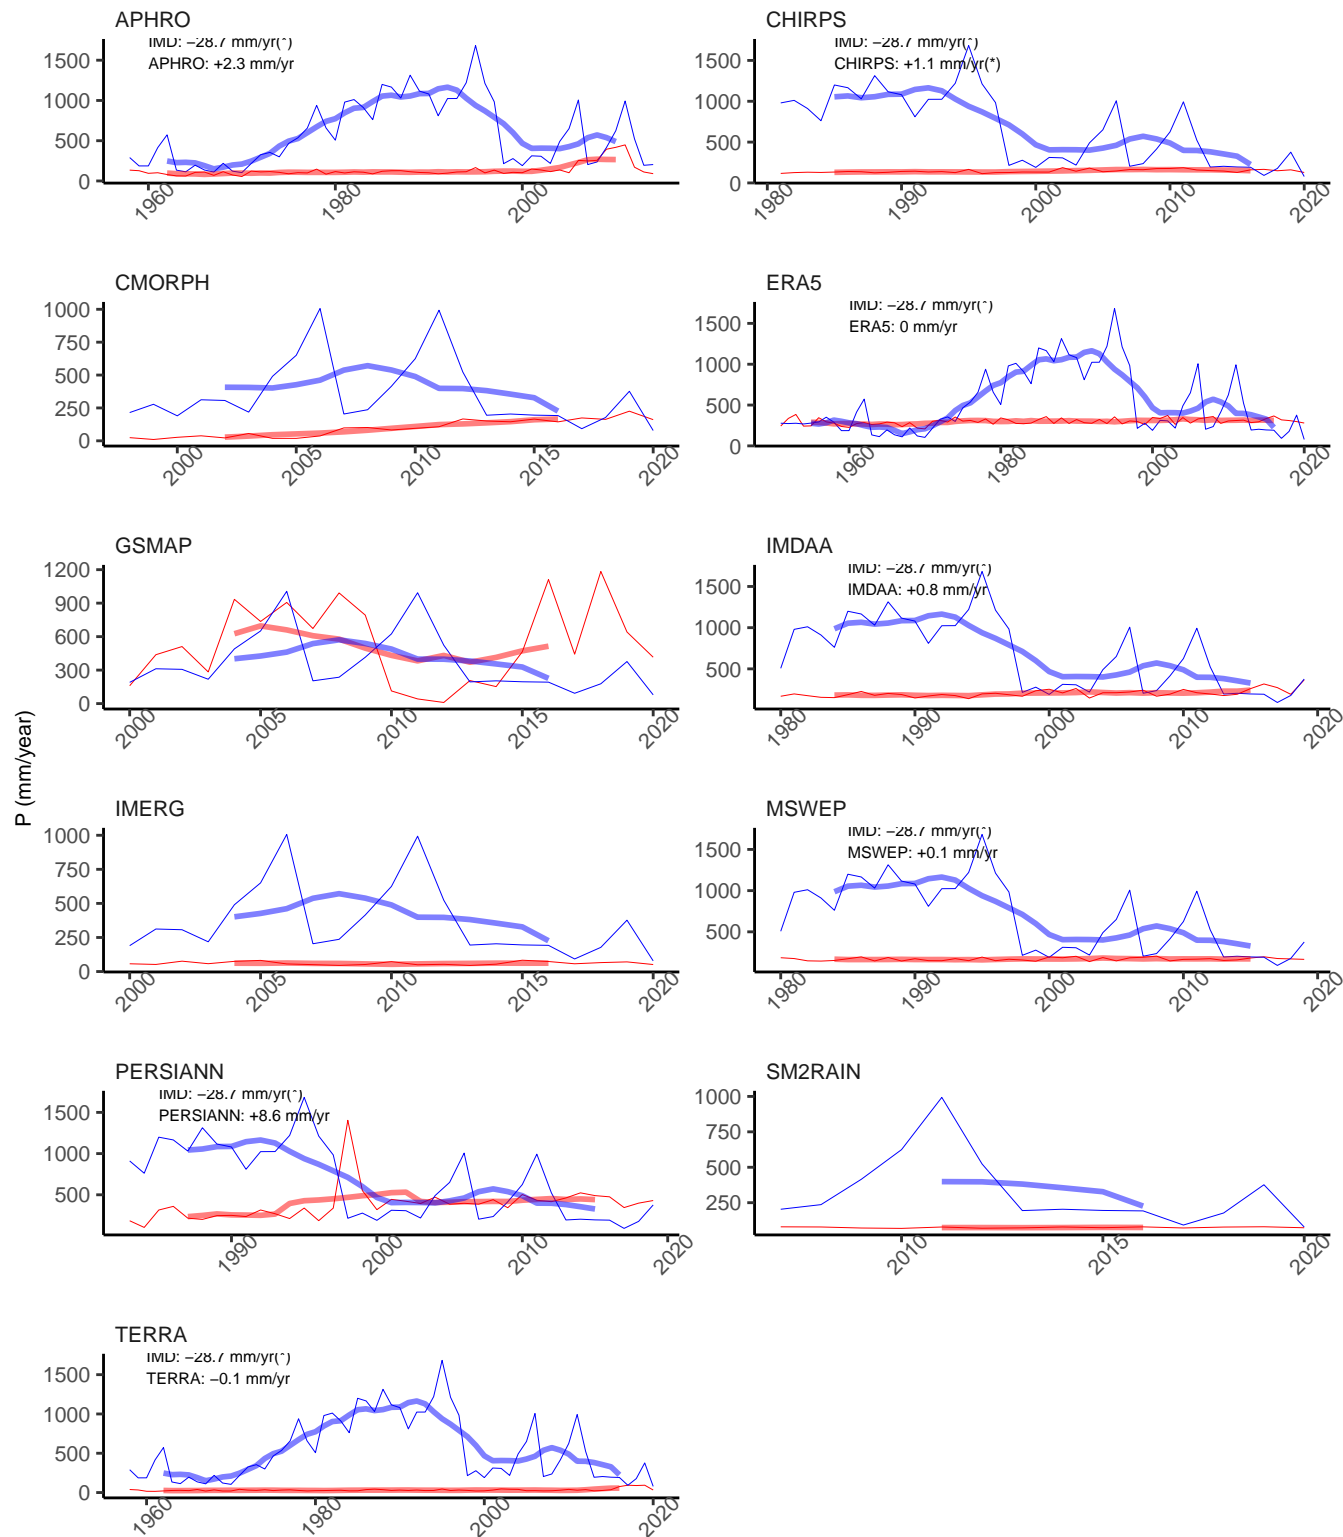

Figure S23: Same as Figure S17, except for the North Ladakh Basin.

# WFR Kutch, basin-averaged WY-based annual precipitation (mm/year)

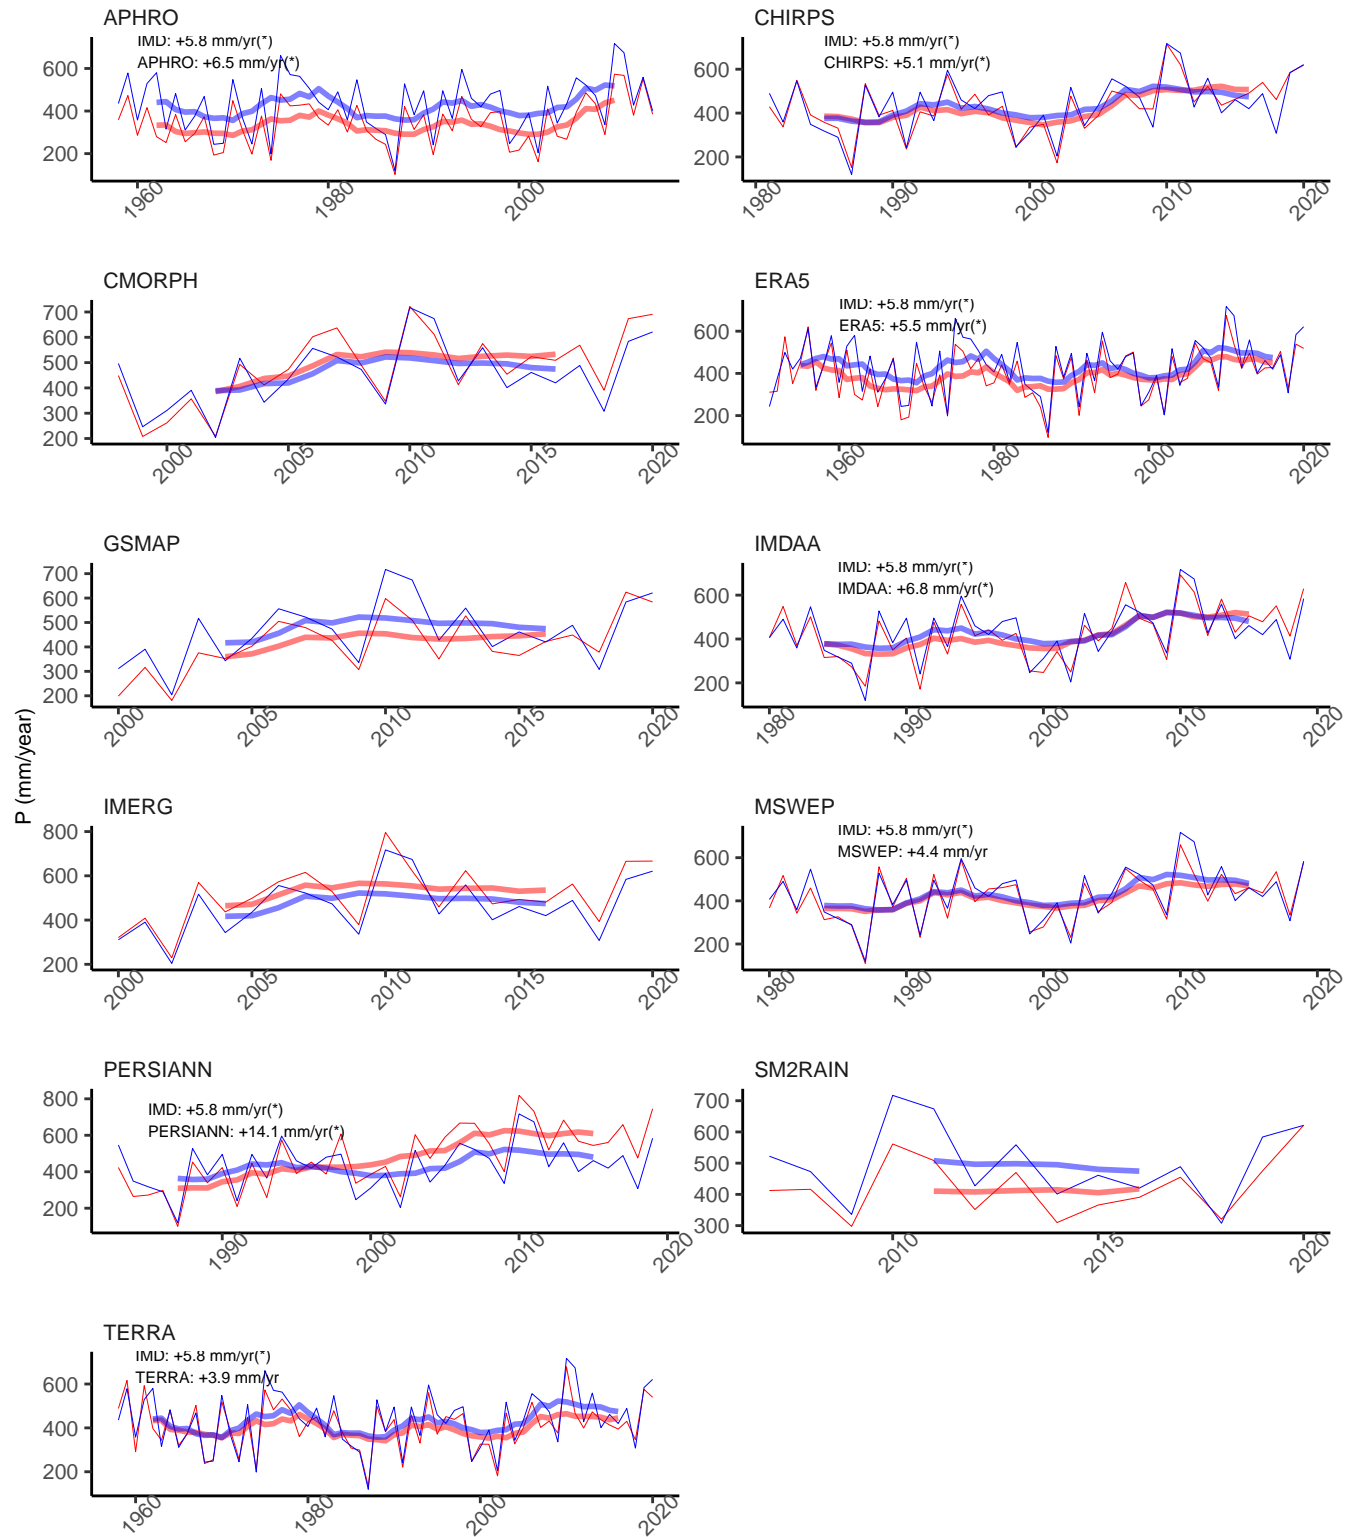

Figure S24: Same as Figure S17, except for the WFR Kutch Basin.

# Brahmani–Baitarani, basin-averaged WY-based annual precipitation (mm/year)

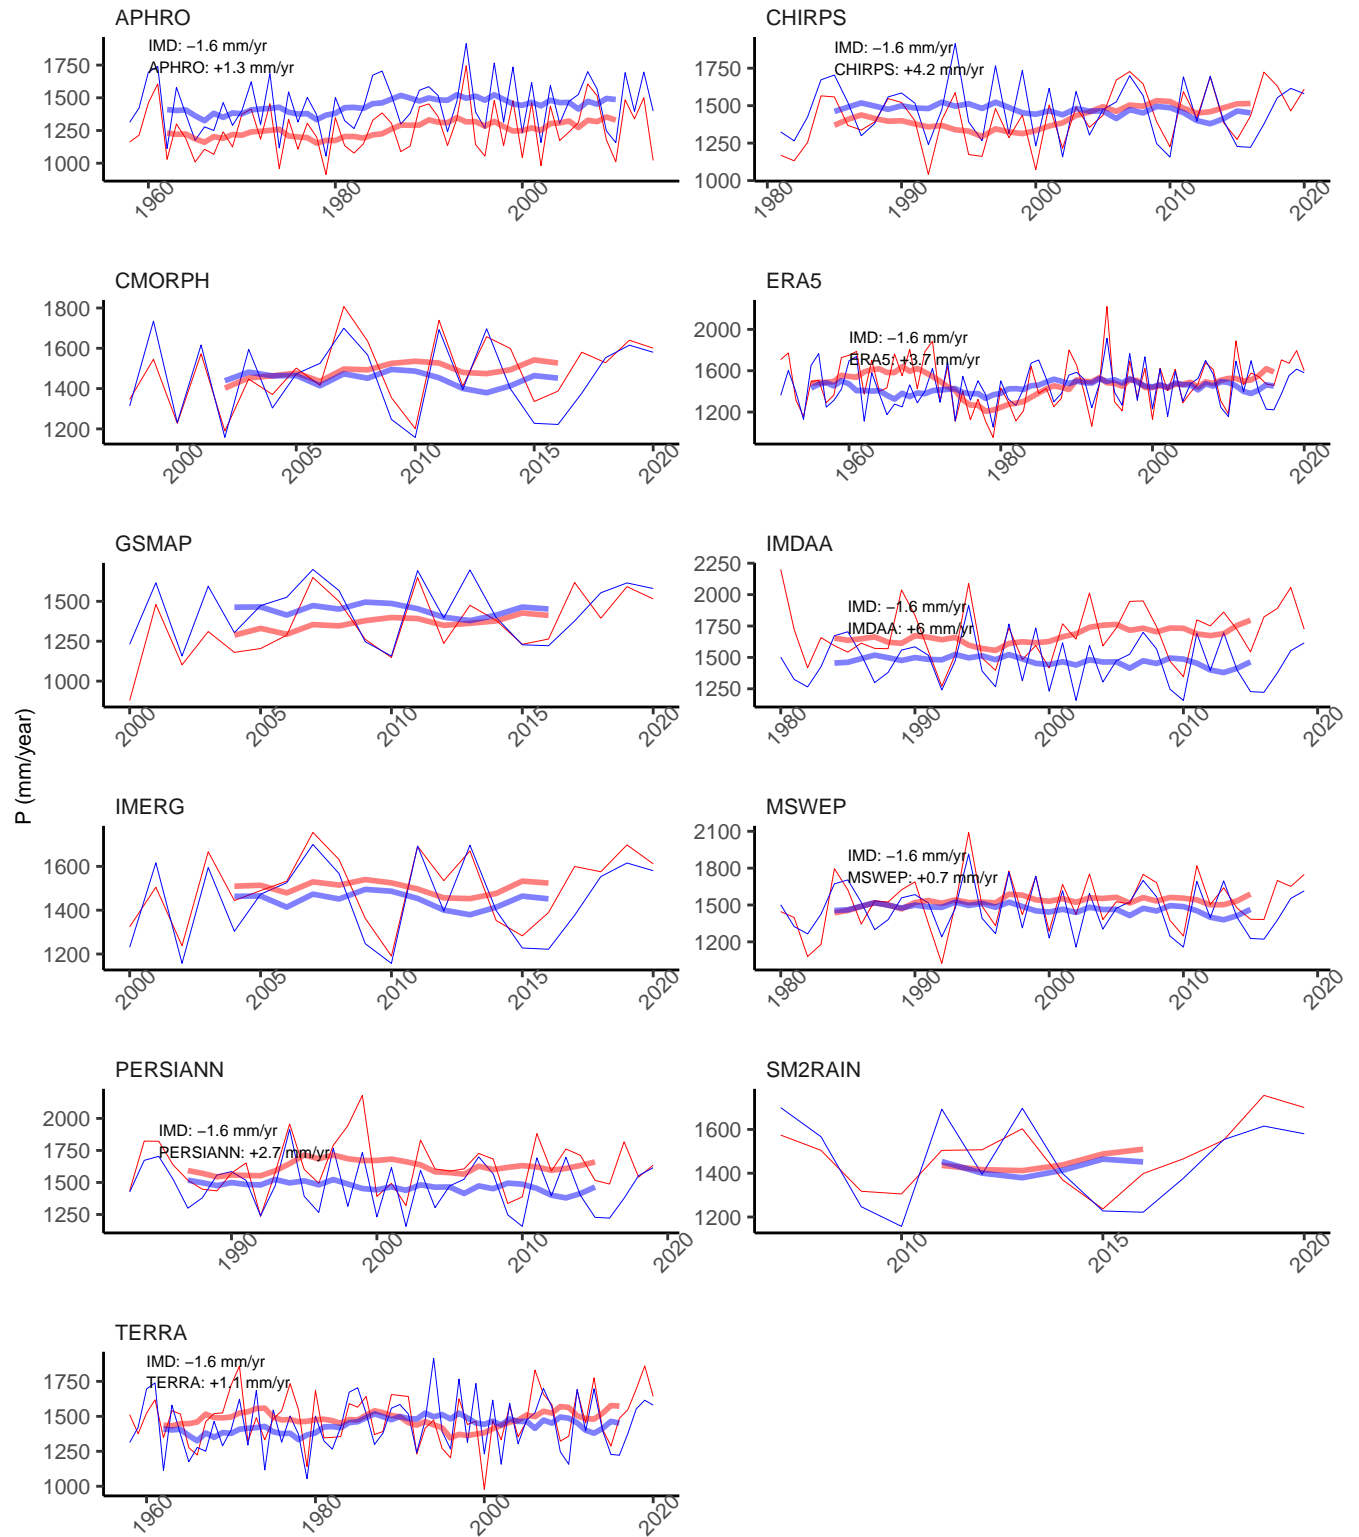

Figure S25: Same as Figure S17, except for the Brahmani-Baitarani Basin.



# Cauvery, basin-averaged WY-based annual precipitation (mm/year)

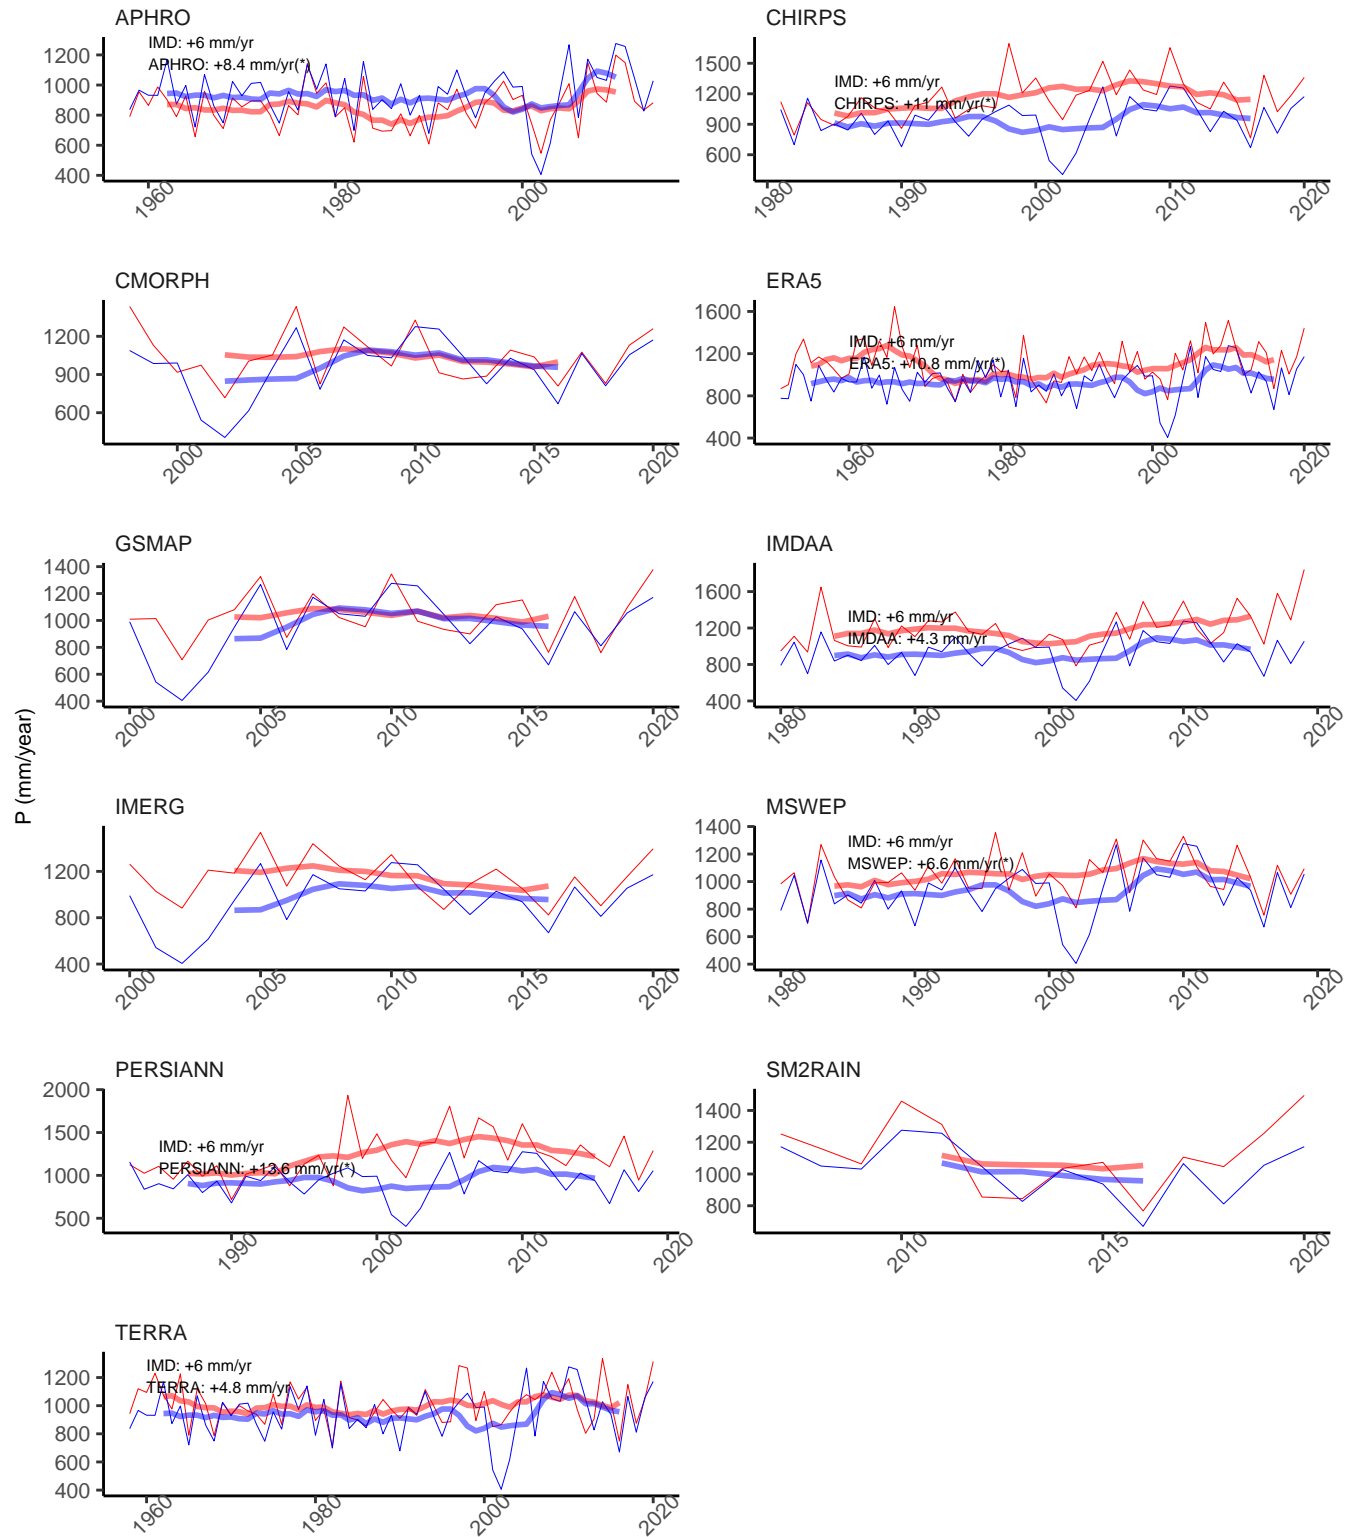

Figure S26: Same as Figure S17, except for the Cauvery Basin.

EFR North, basin-averaged WY-based annual precipitation (mm/year)

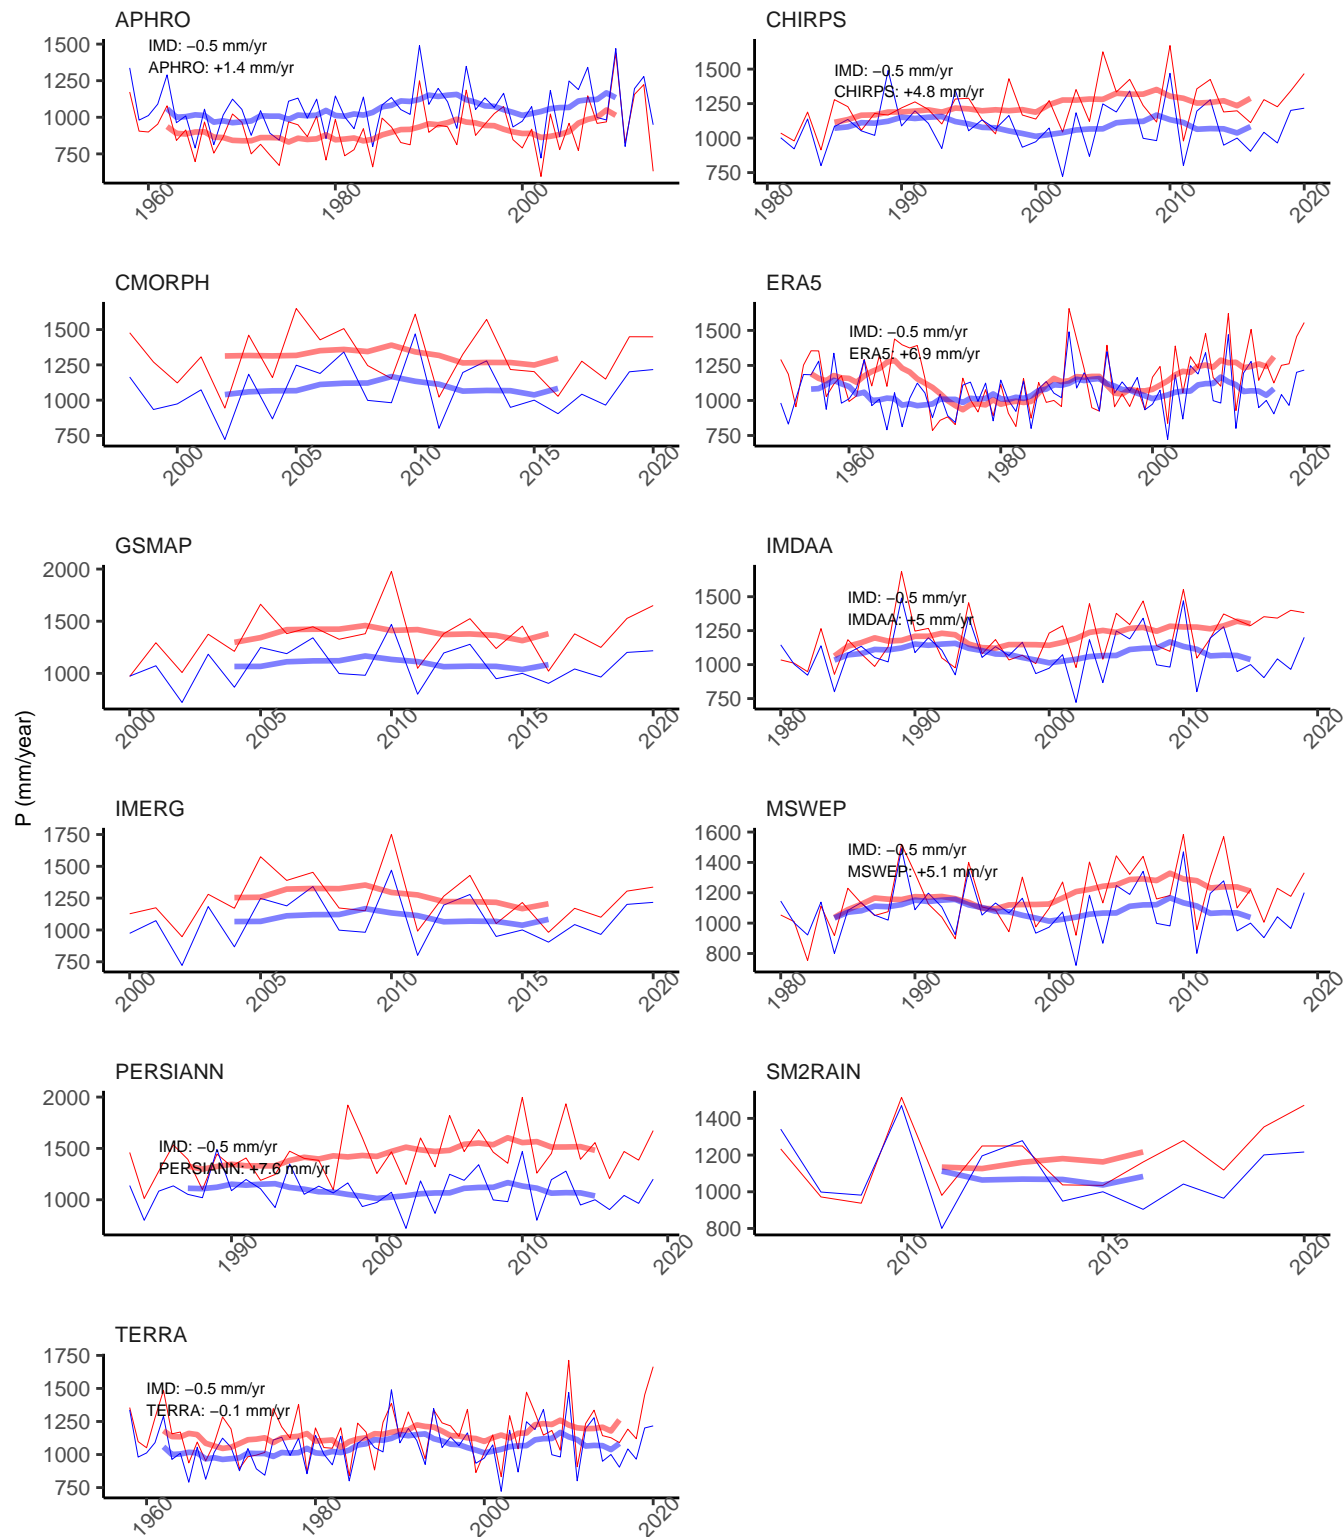

Figure S27: Same as Figure S17, except for the EFR North Basin.

# EFR South, basin-averaged WY-based annual precipitation (mm/year)

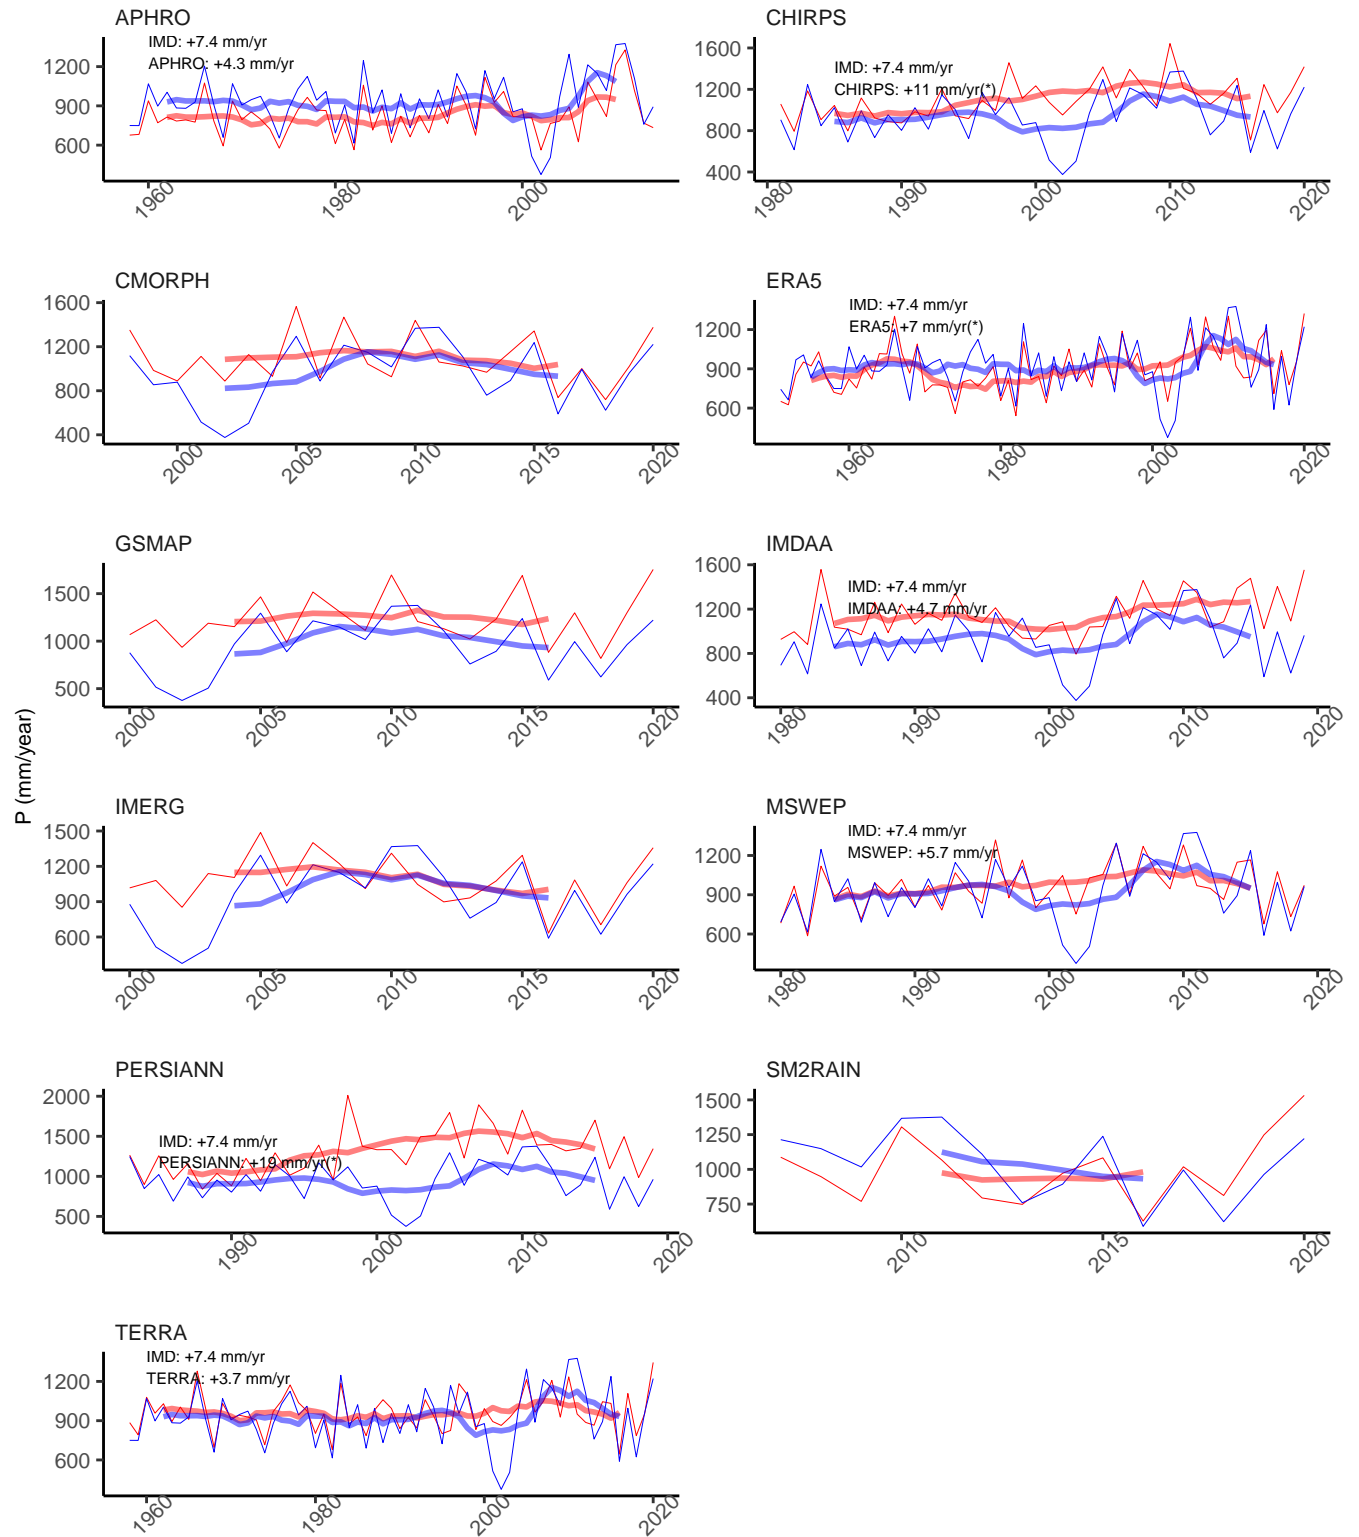

Figure S28: Same as Figure S17, except for the EFR South Basin.

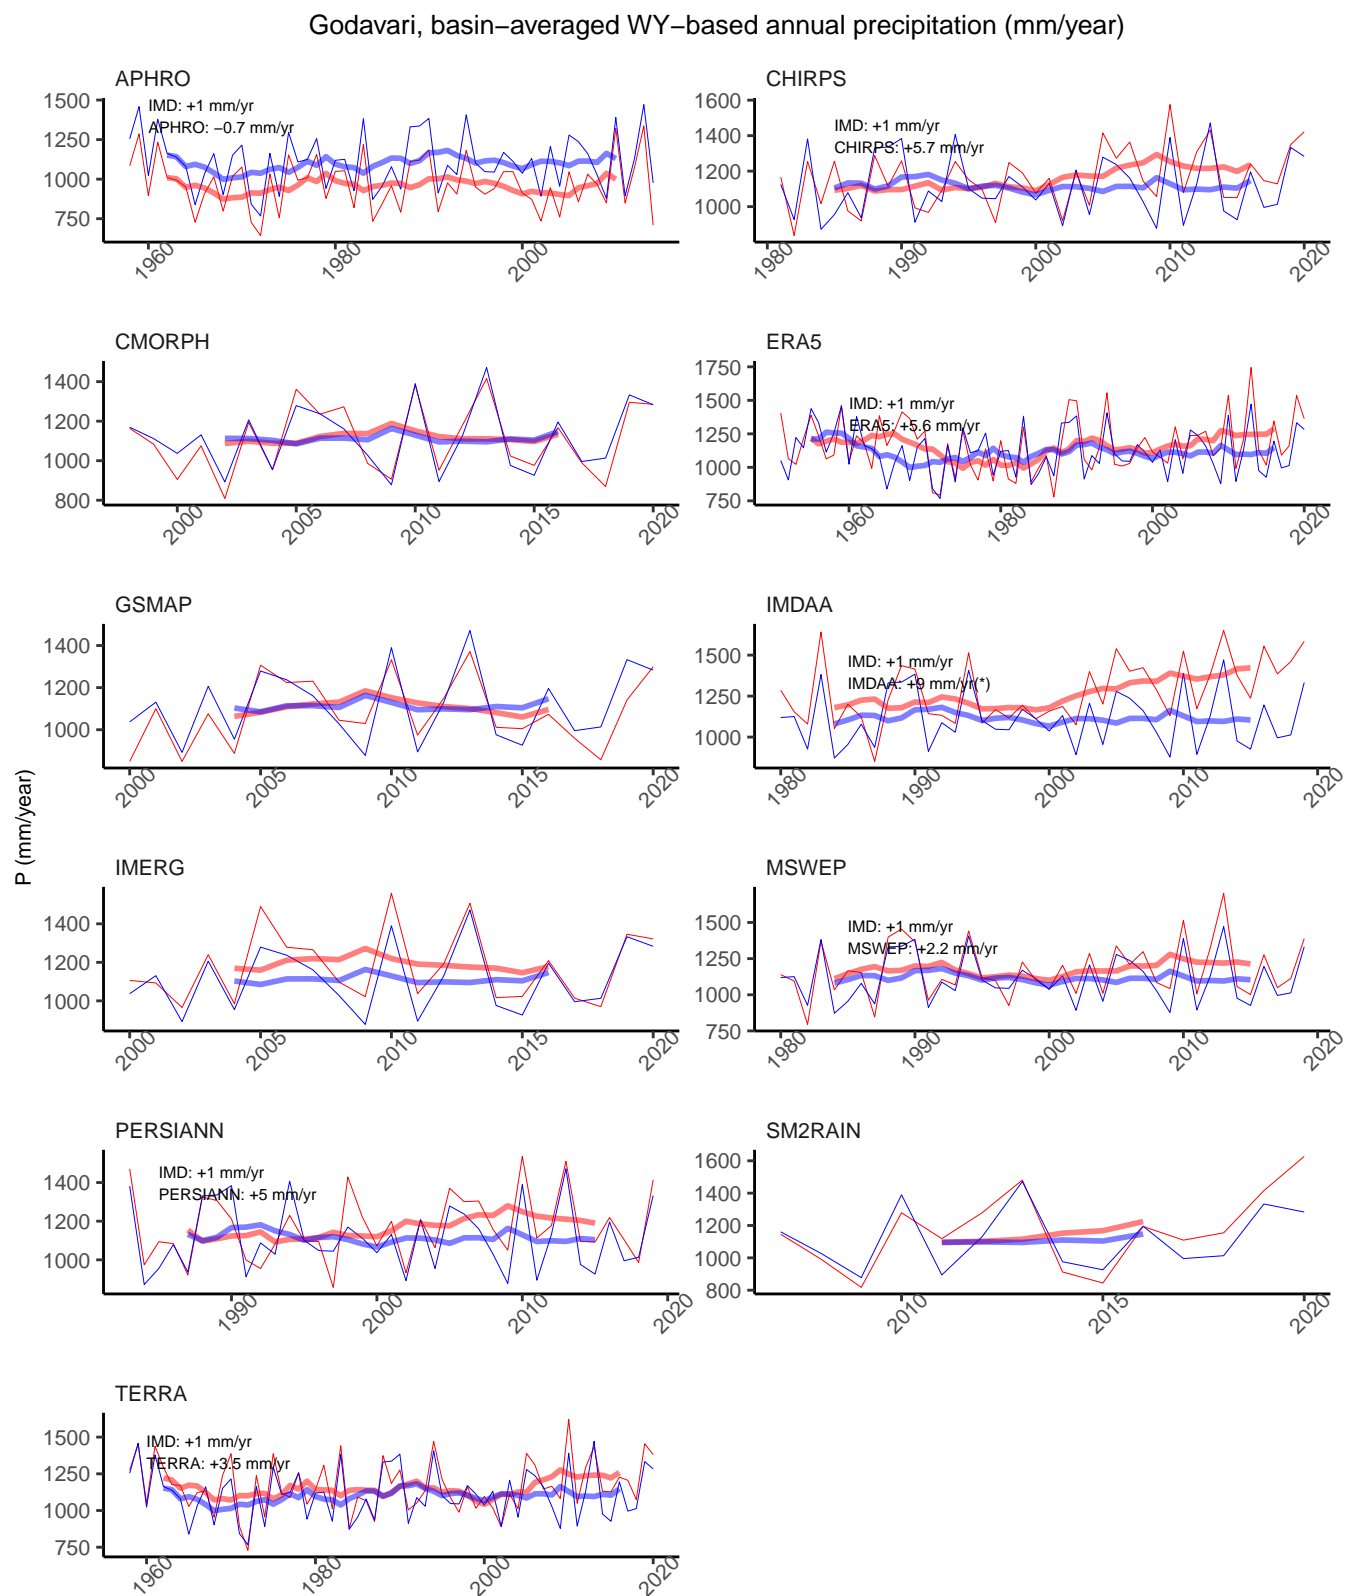

Figure S29: Same as Figure S17, except for the Godavari Basin.

# Krishna, basin-averaged WY-based annual precipitation (mm/year)

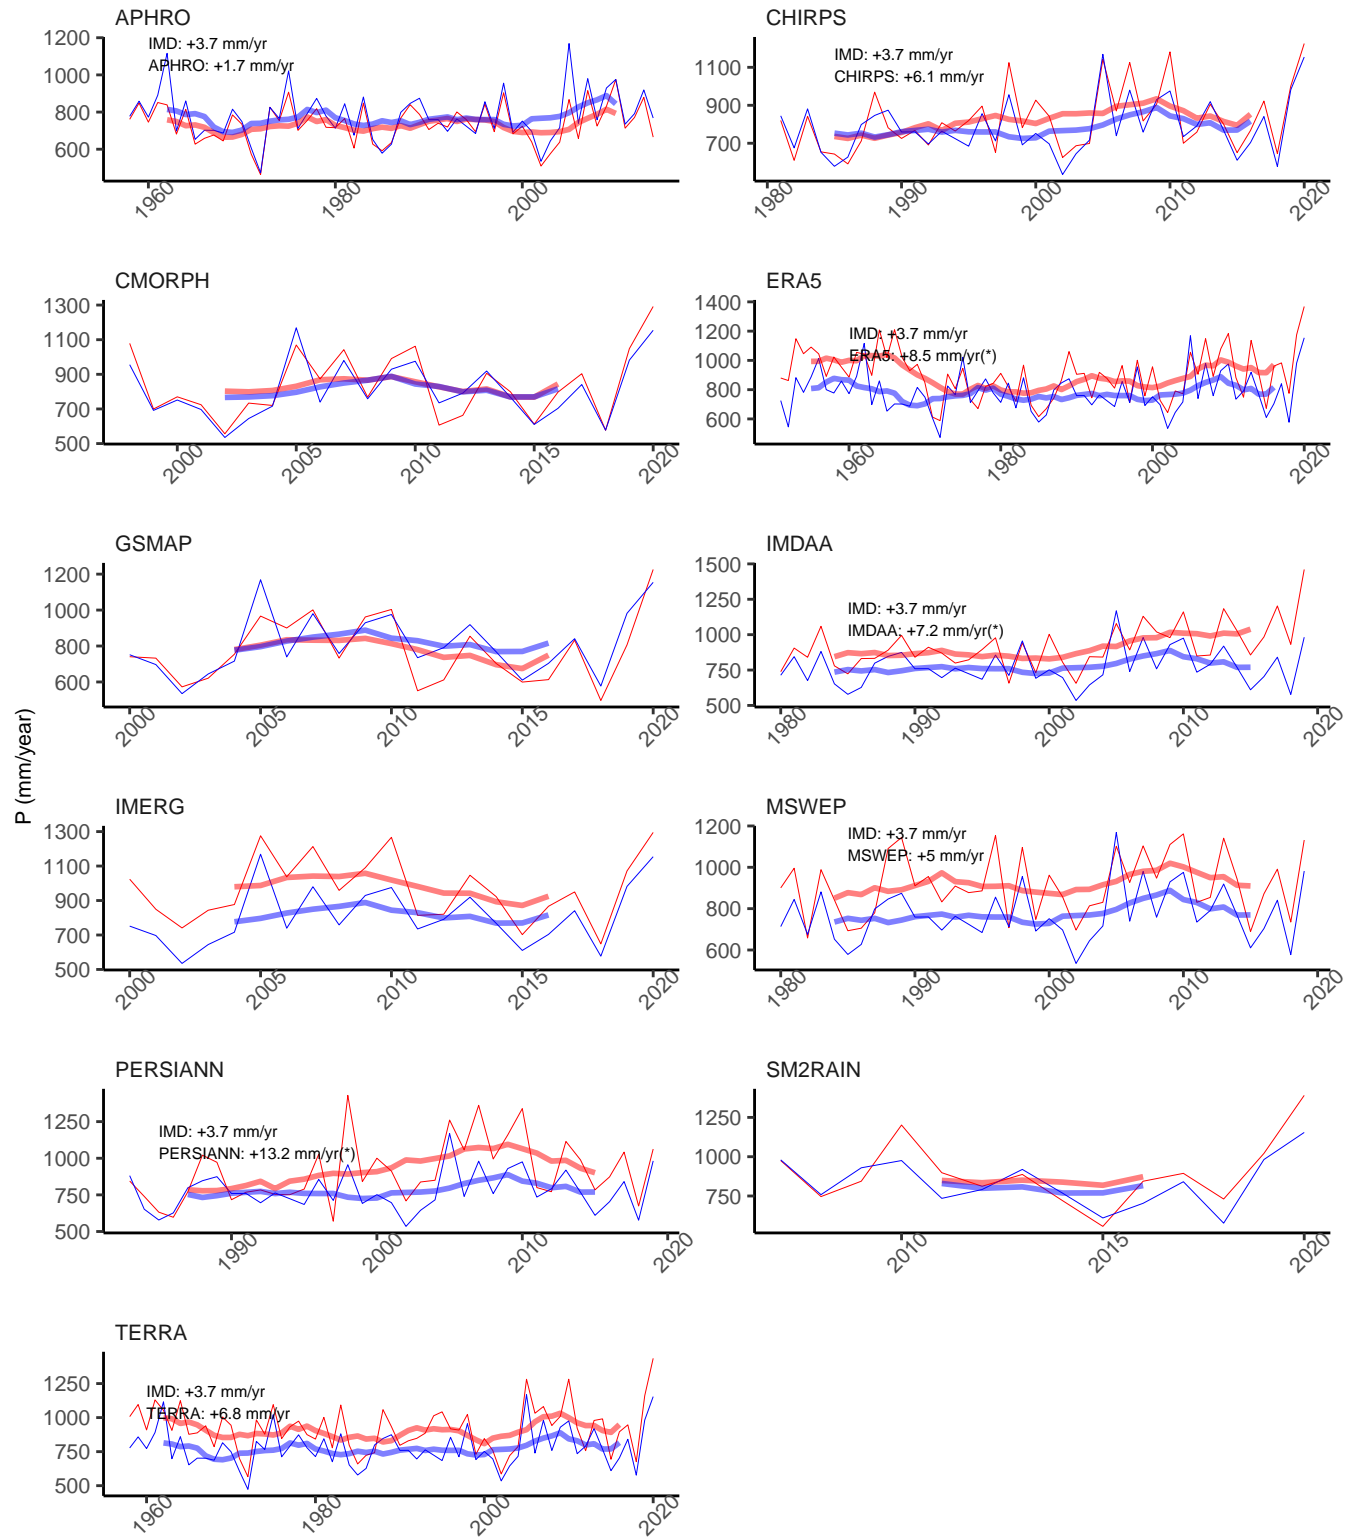

Figure S30: Same as Figure S17, except for the Krishna Basin.

# Mahanadi, basin-averaged WY-based annual precipitation (mm/year)

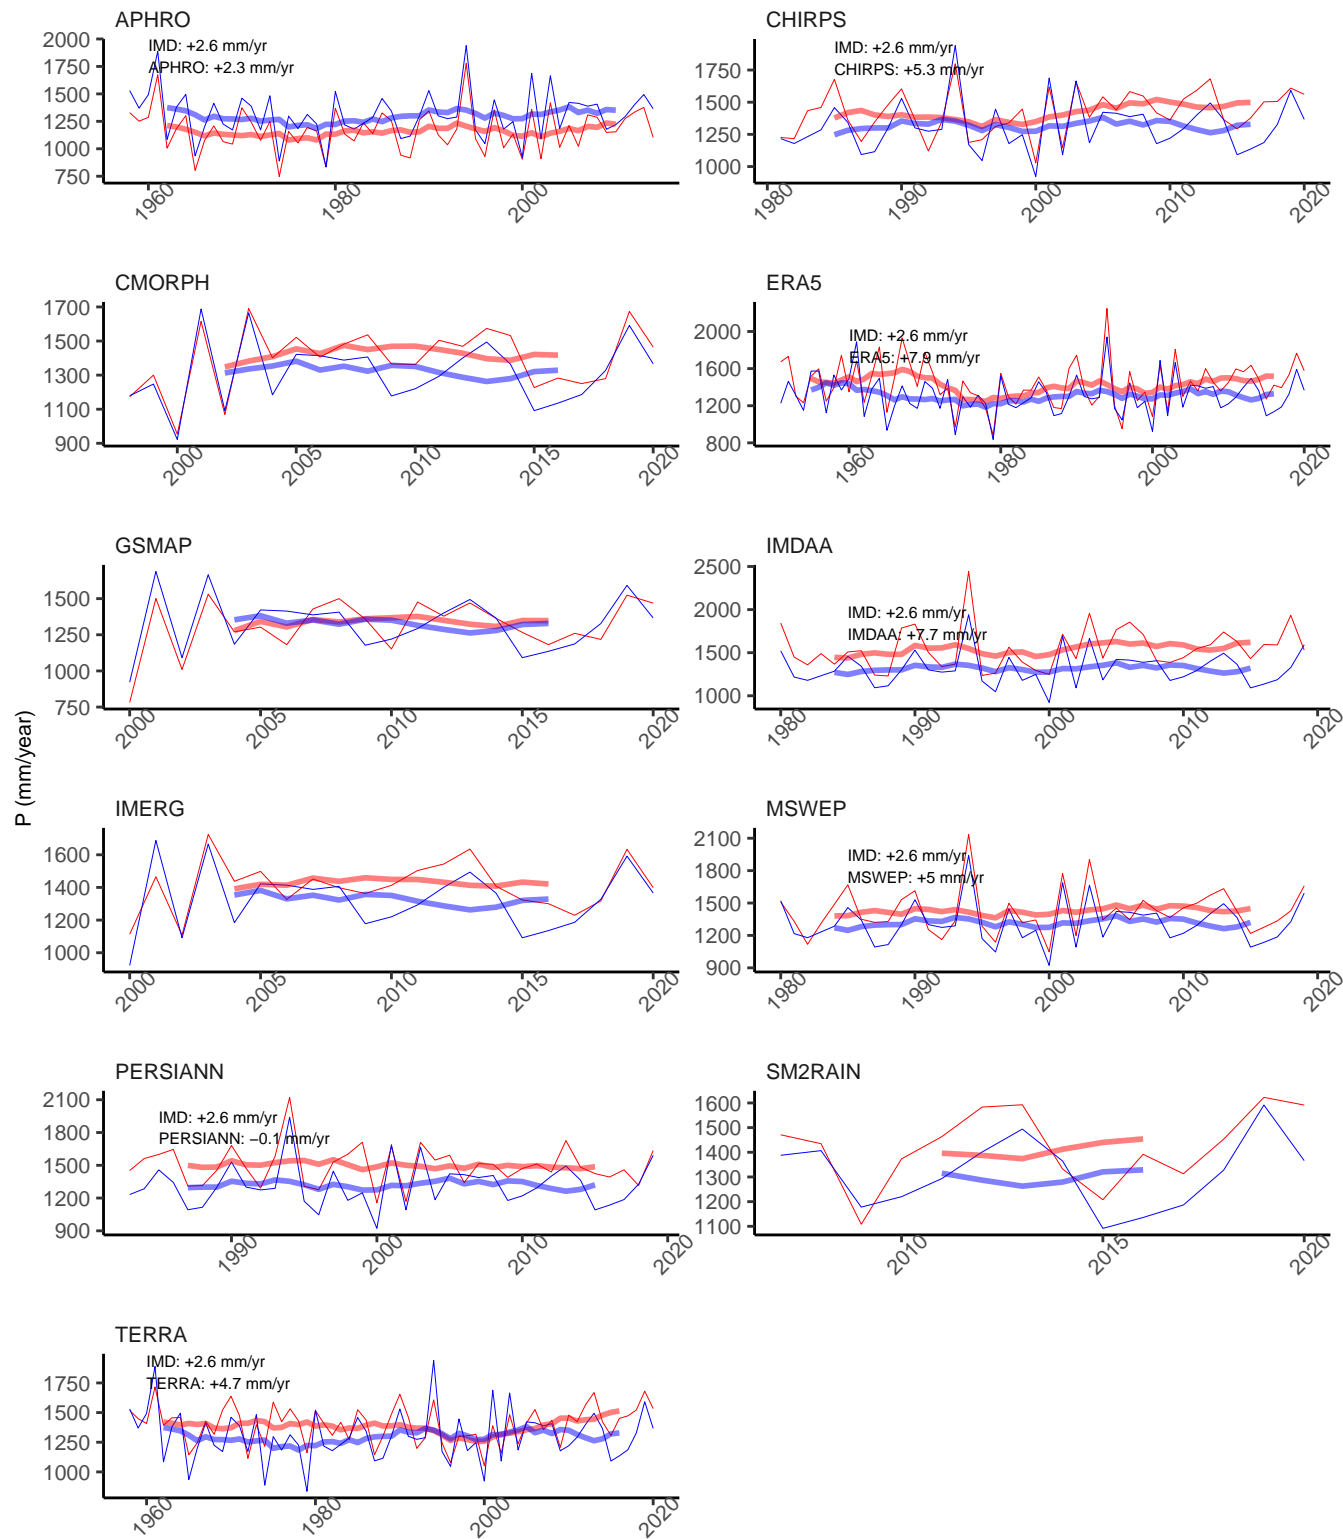

Figure S31: Same as Figure S17, except for the Mahanadi Basin.

# Mahi, basin-averaged WY-based annual precipitation (mm/year)

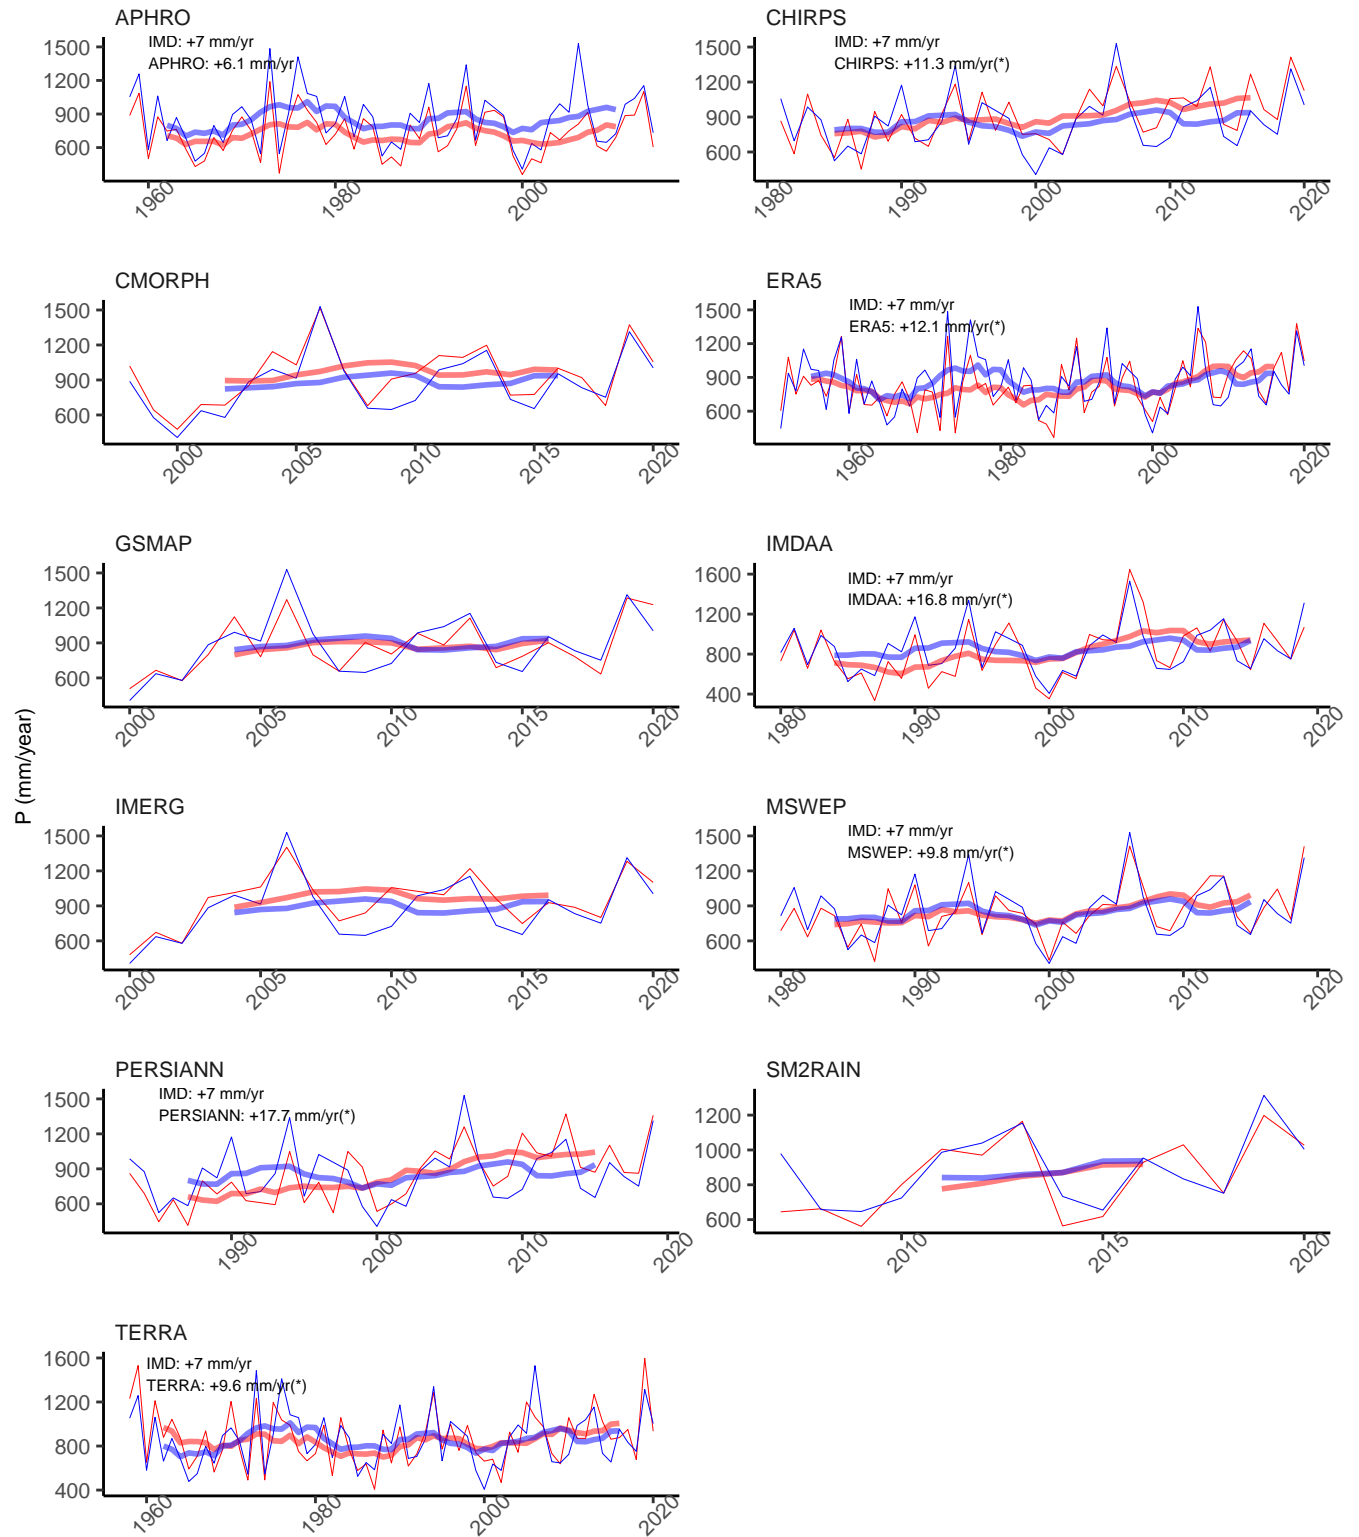

Figure S32: Same as Figure S17, except for the Mahi Basin.

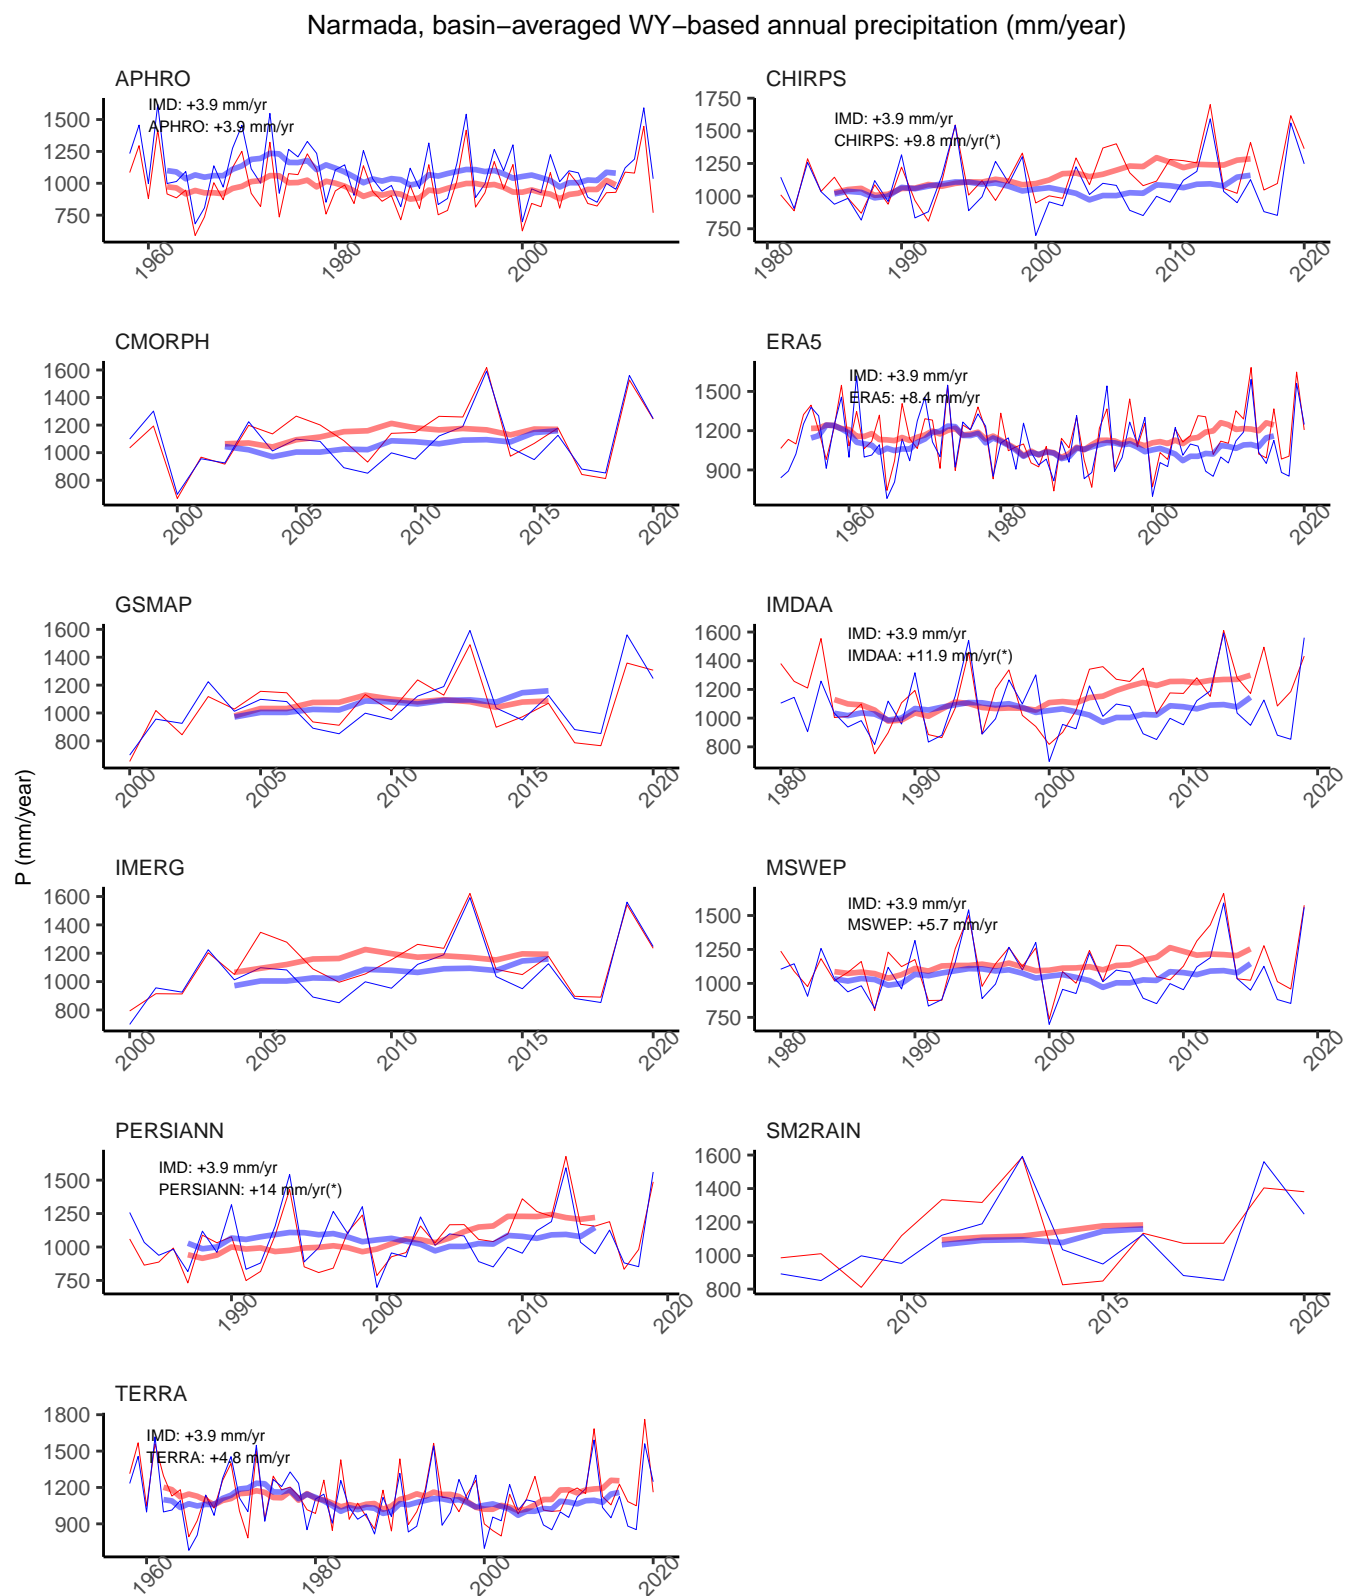

Figure S33: Same as Figure S17, except for the Narmada Basin.



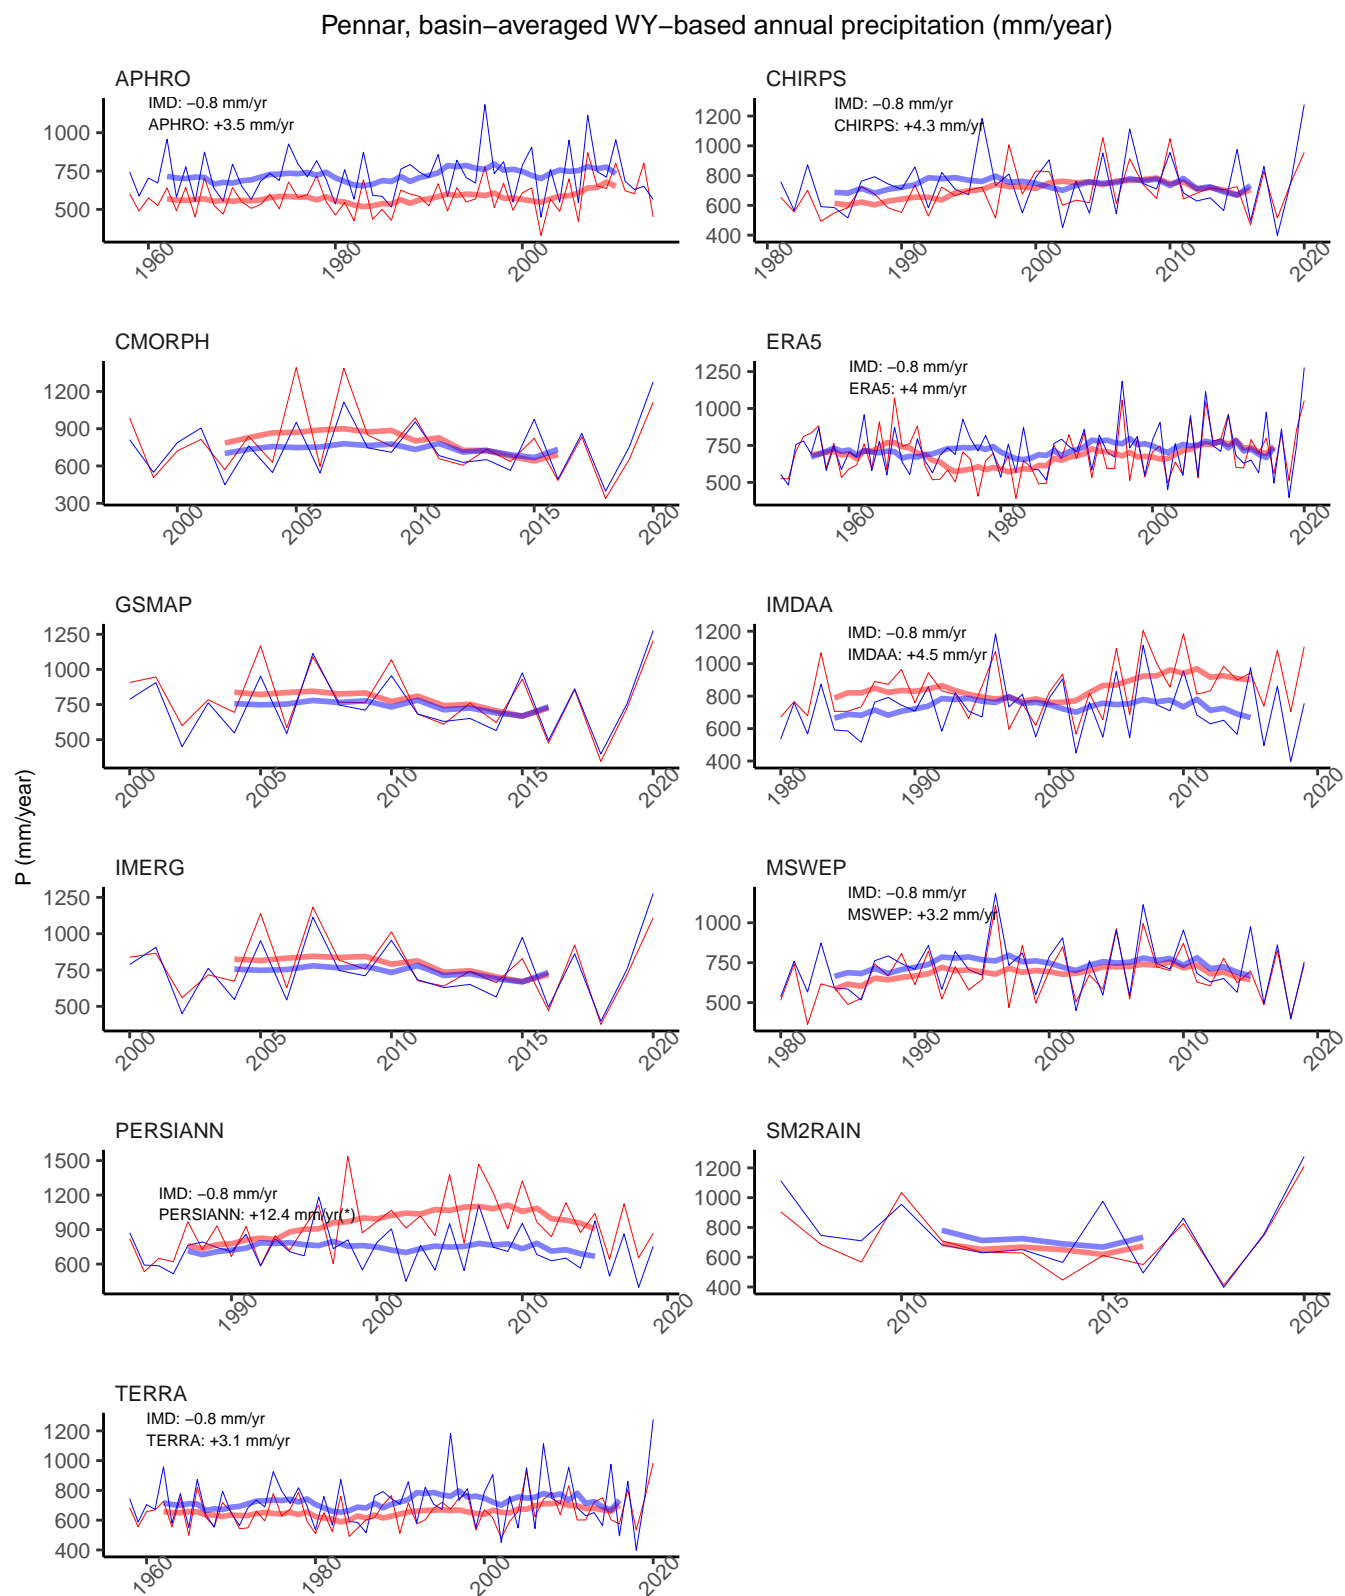

Figure S34: Same as Figure S17, except for the Pennar Basin.

# Sabarmati, basin-averaged WY-based annual precipitation (mm/year)

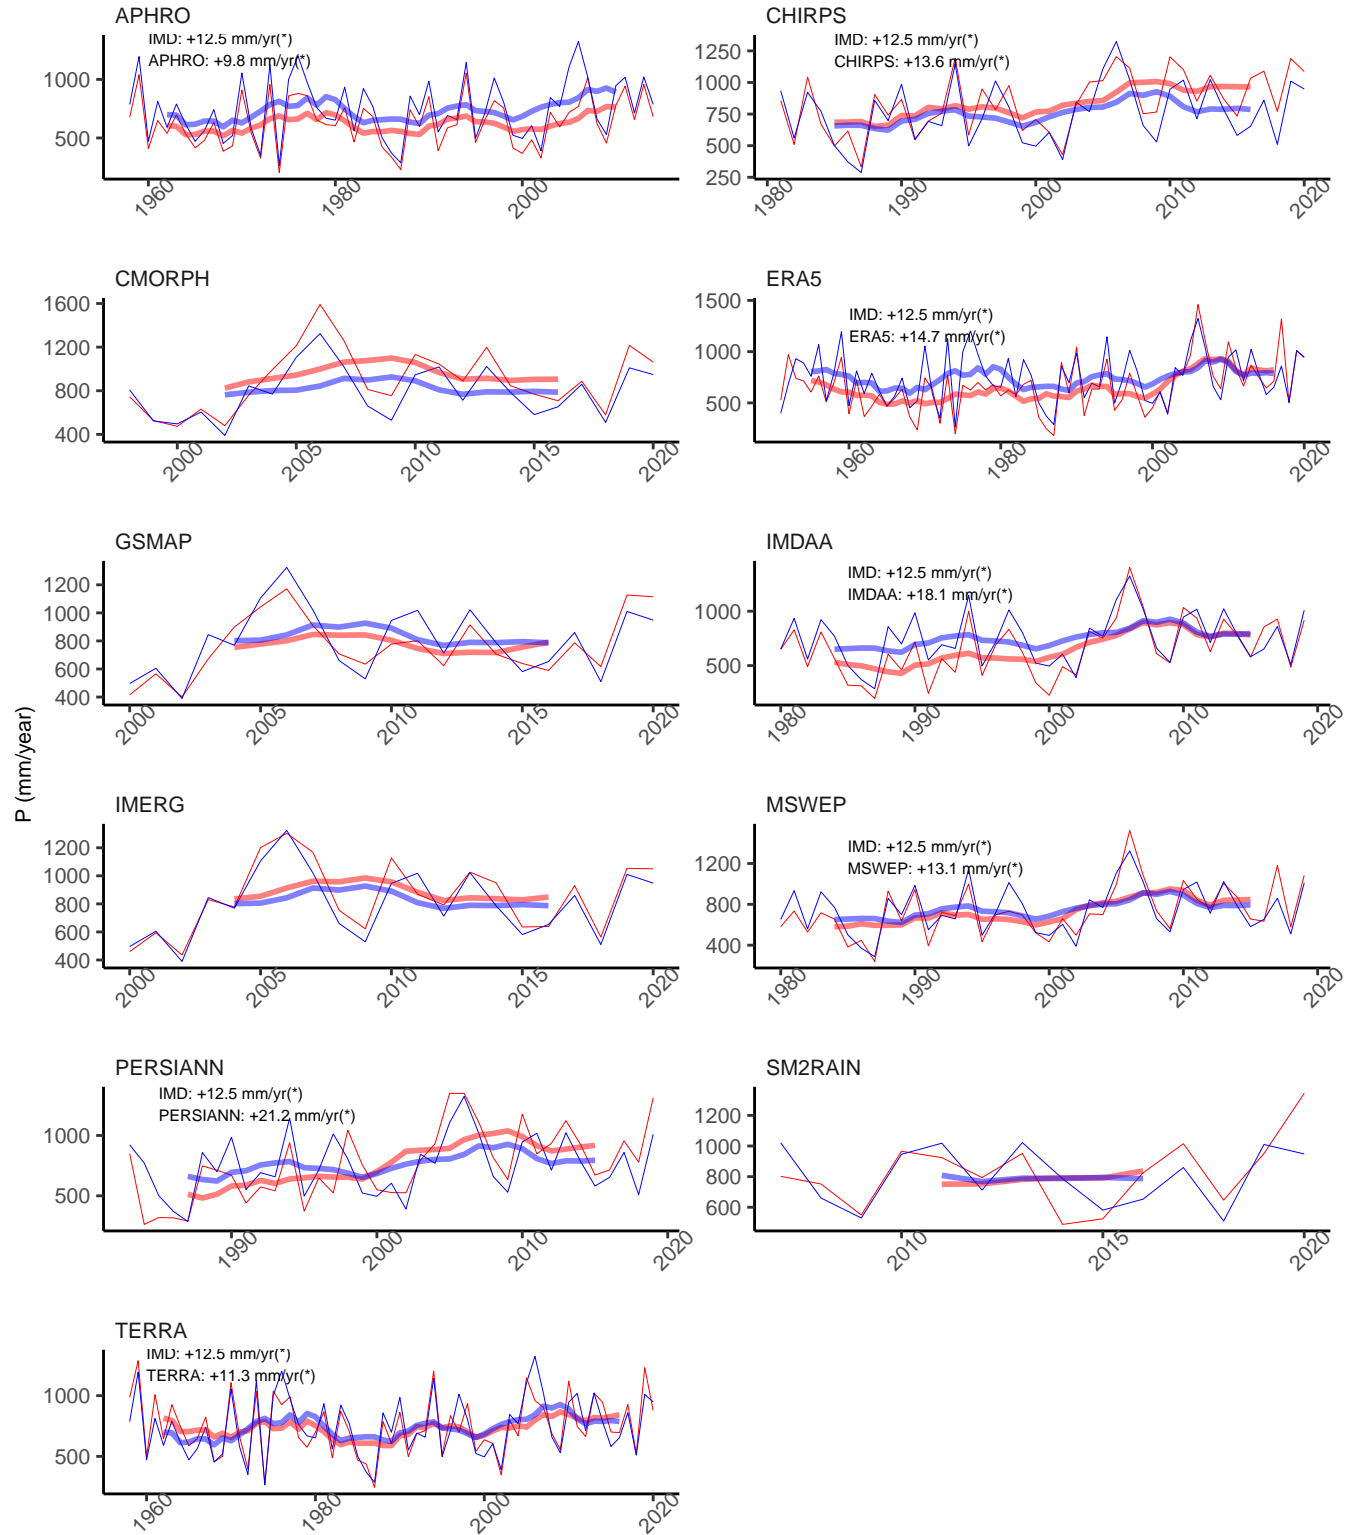

Figure S35: Same as Figure S17, except for the Sabarmati Basin.

# Subernarekha, basin-averaged WY-based annual precipitation (mm/year)

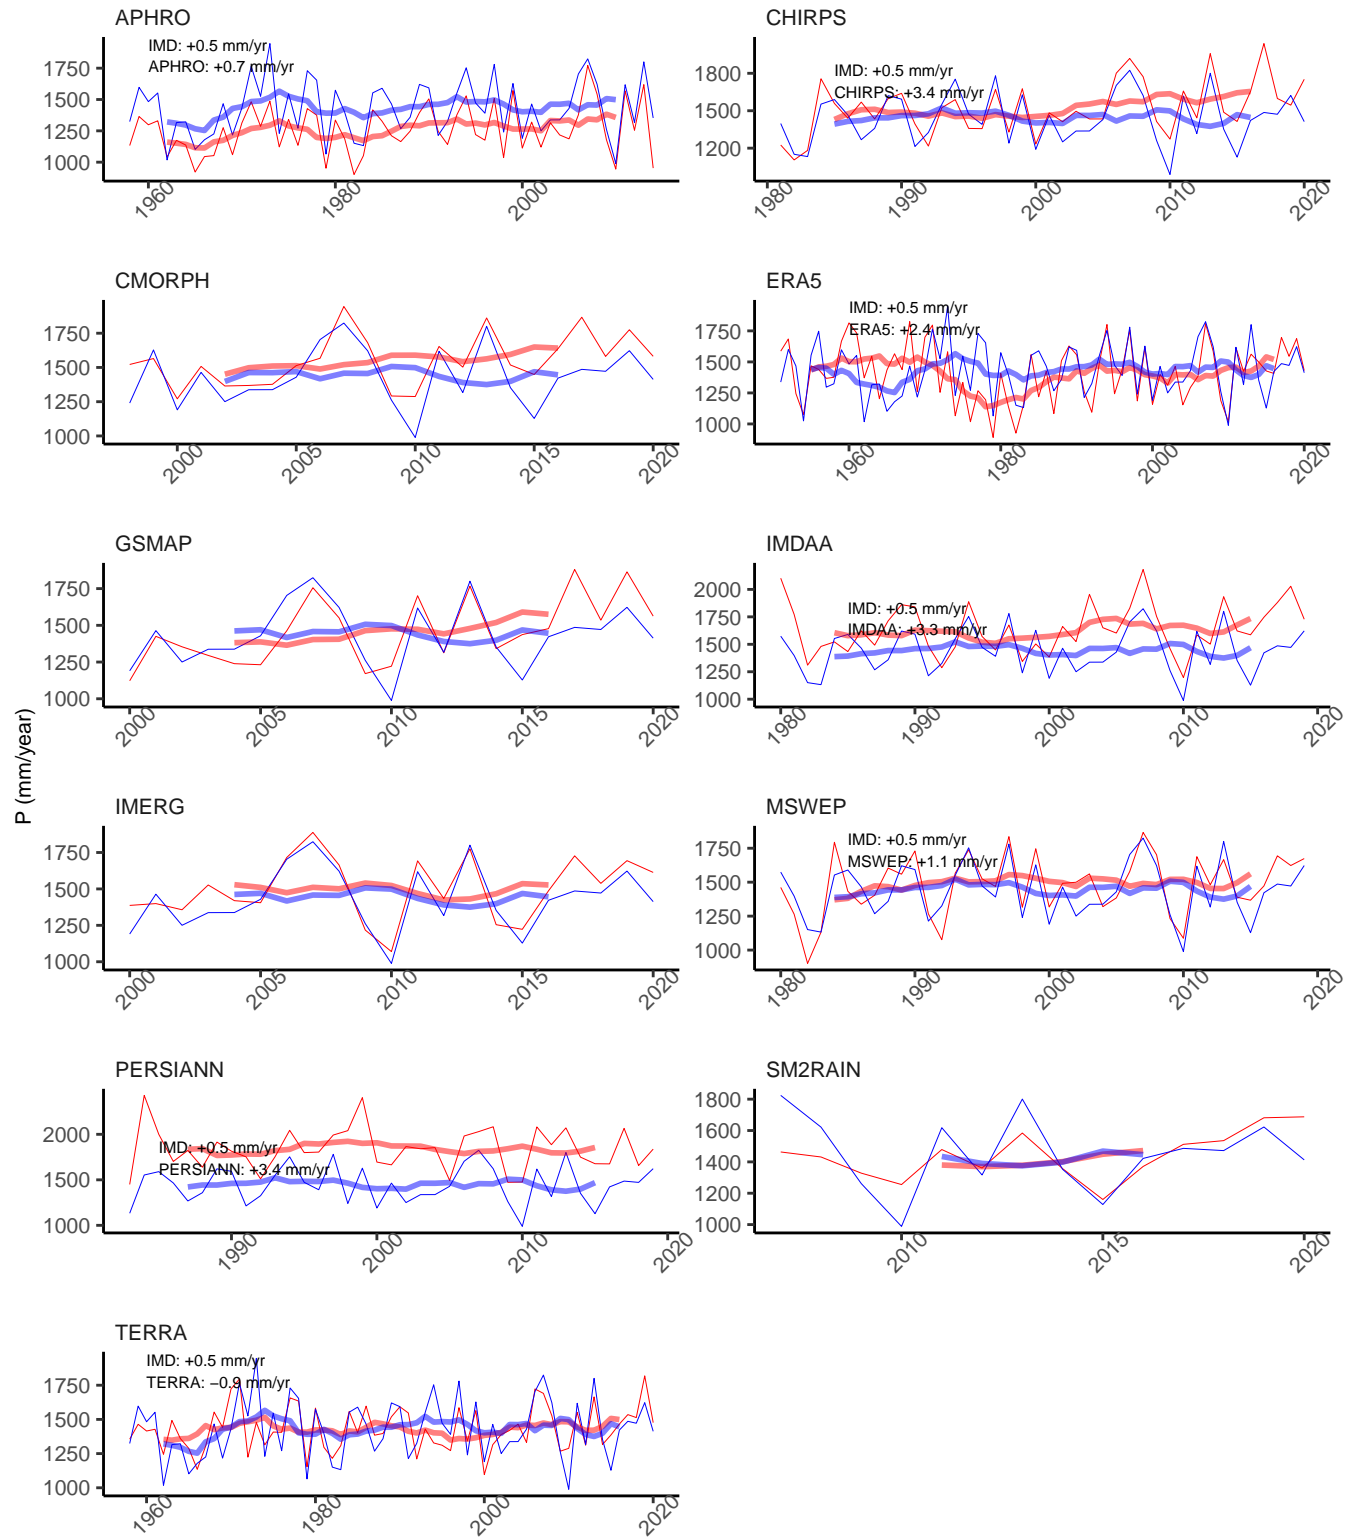

Figure S36: Same as Figure S17, except for the Subernarekha Basin.

# Tapi, basin-averaged WY-based annual precipitation (mm/year)

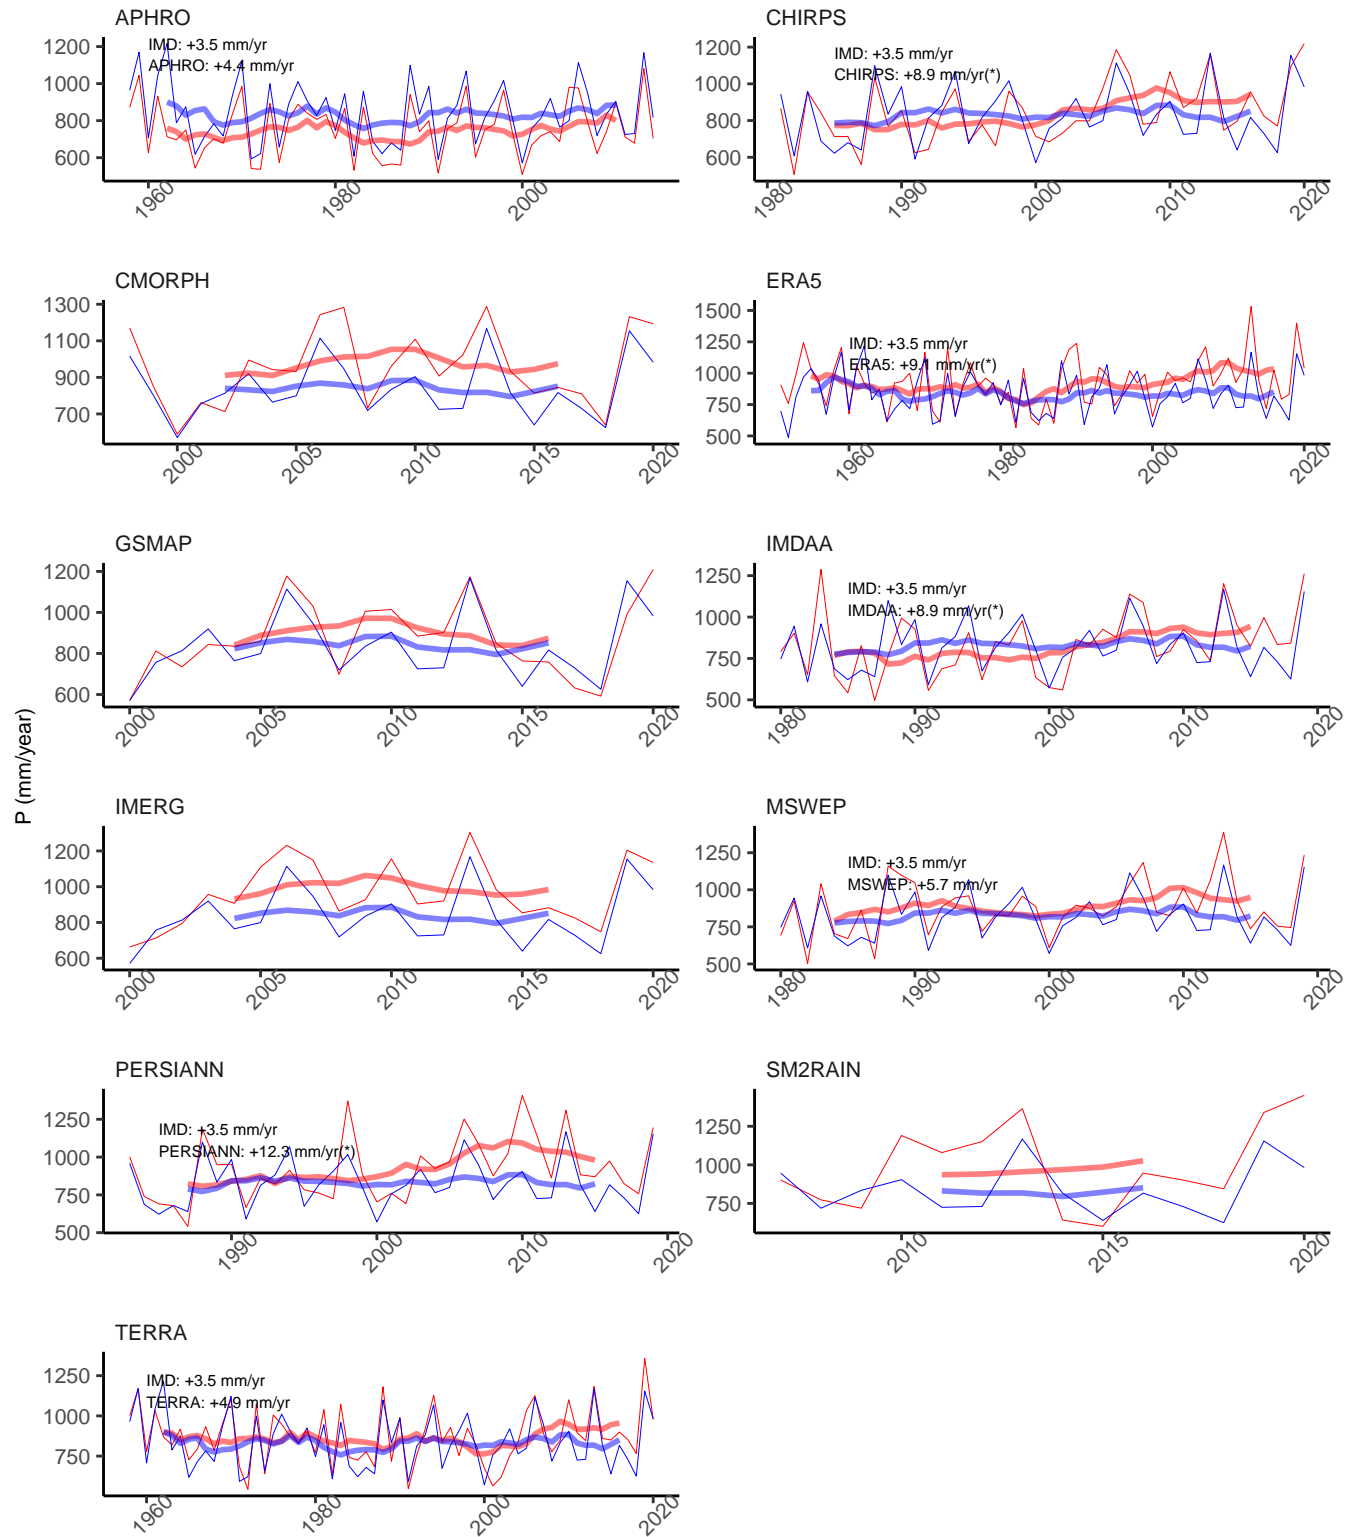

Figure S37: Same as Figure S17, except for the Tapi Basin.

# WFR North, basin-averaged WY-based annual precipitation (mm/year)

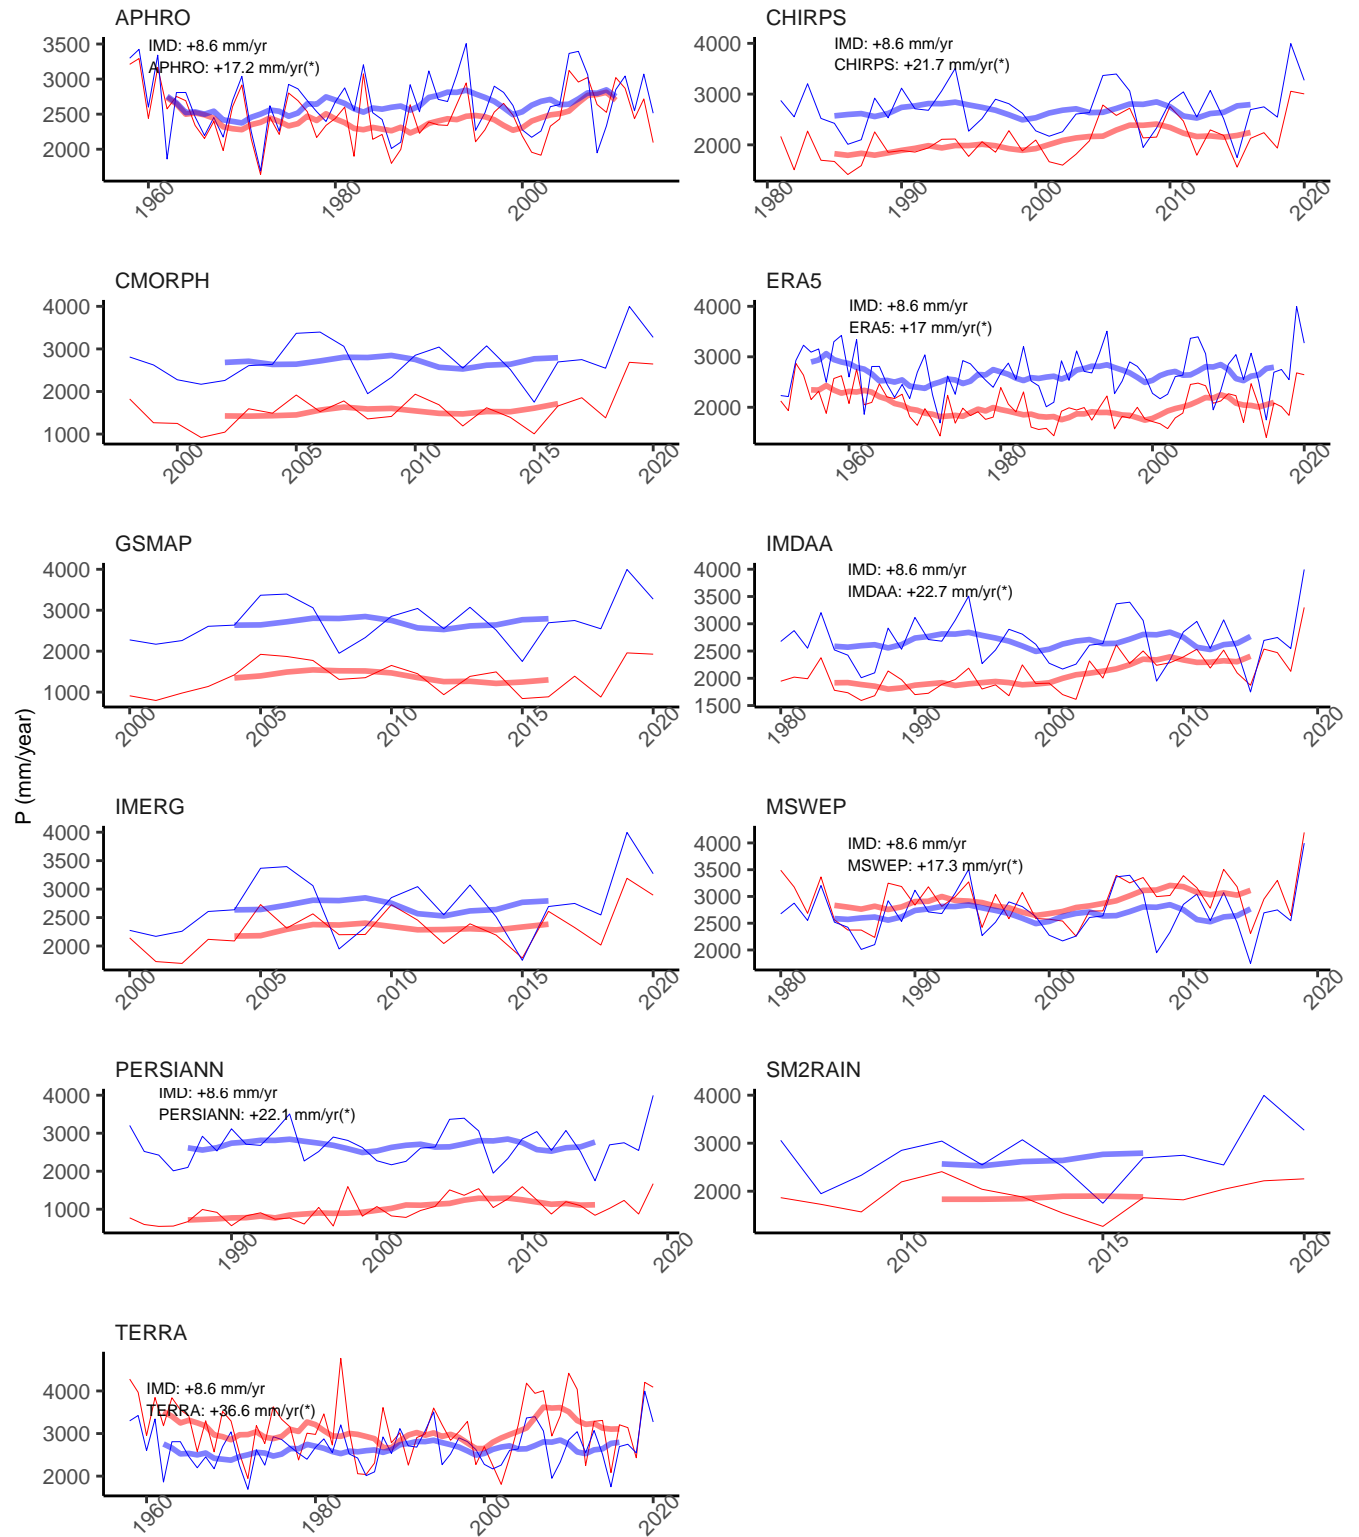

Figure S38: Same as Figure S17, except for the WFR North Basin.

# WFR South, basin-averaged WY-based annual precipitation (mm/year)

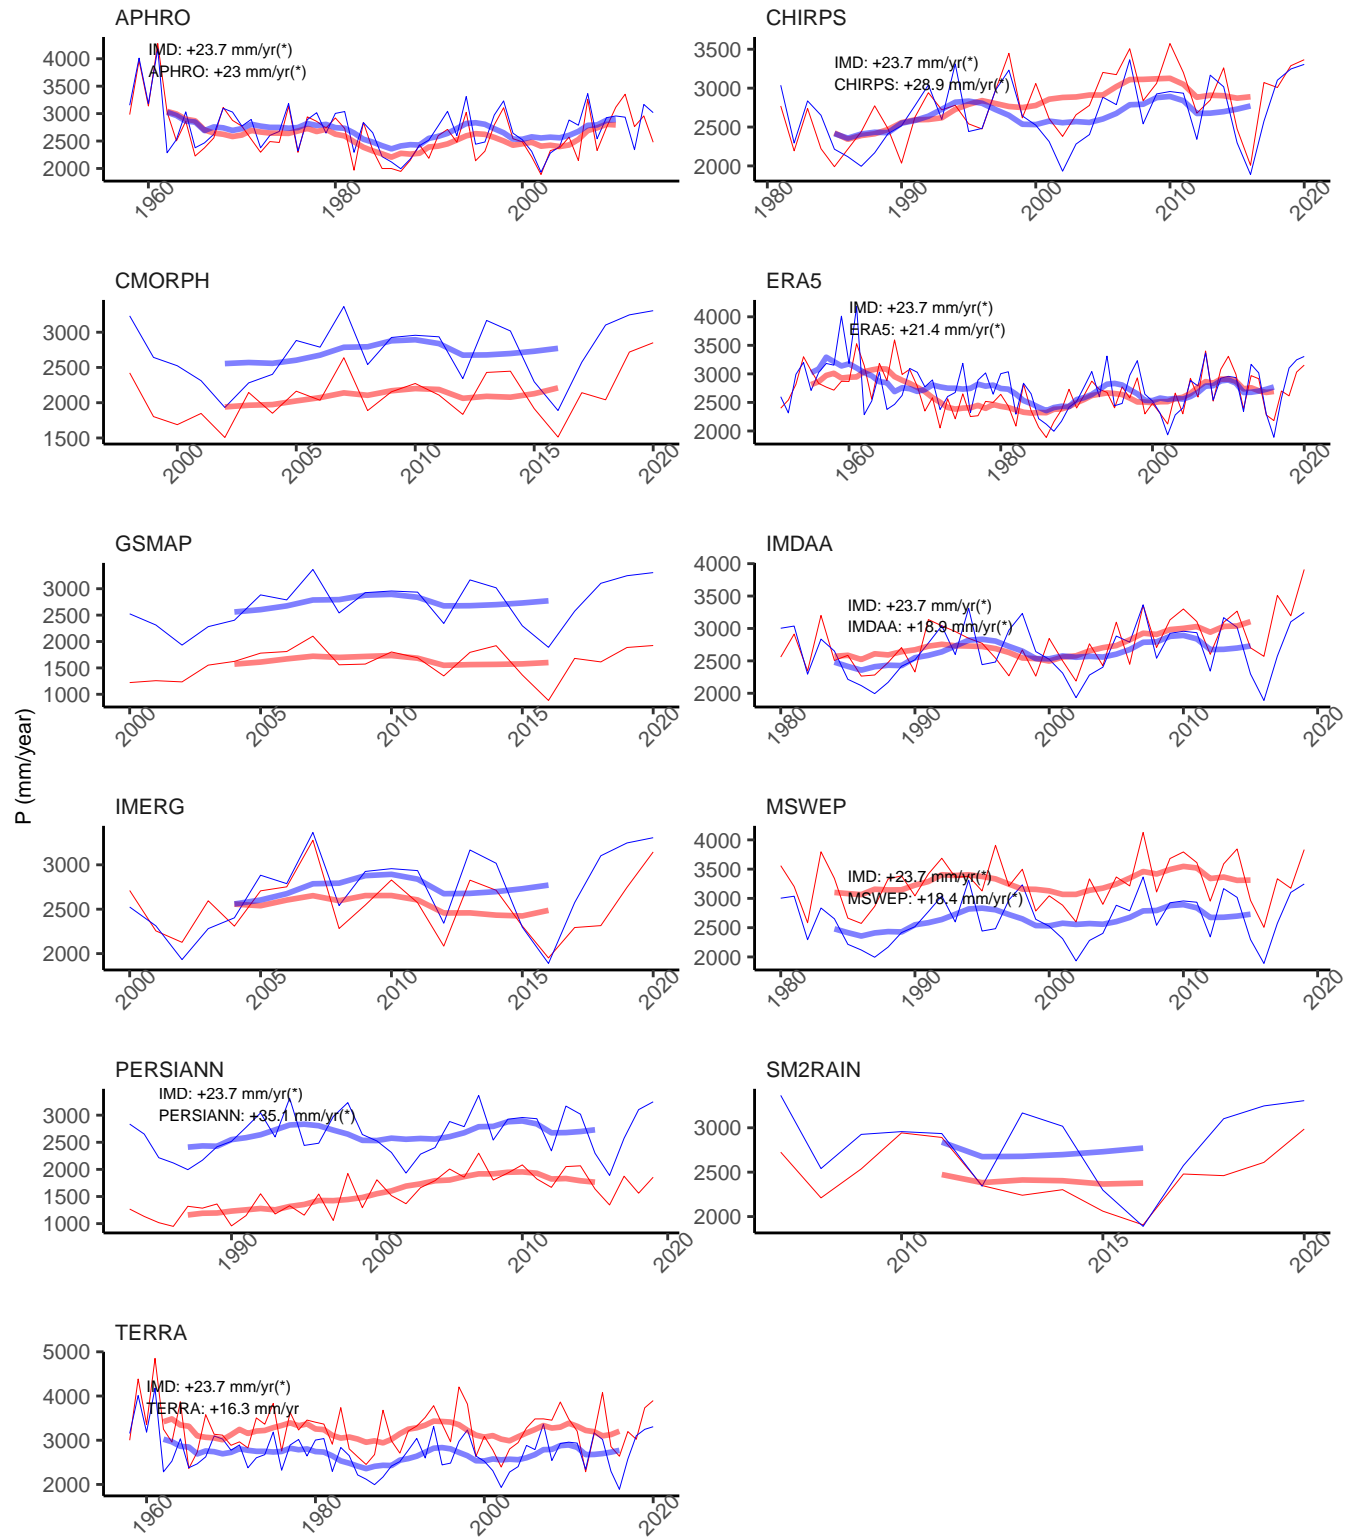

Figure S39: Same as Figure S17, except for the WFR South Basin.

## S2.4 IMD versus Other Products

Table S2: Trend in annual basin-aggregated  $P$  (mm/year) for WY 1985-2014 for select datasets. Statistically significant values are indicated by ‘(\*)’.

| Basin              | IMD      | APHRO    | CHIRPS   | ERA5     | IMDAA    | MSWEP    | PERSIANN | TERRA    |
|--------------------|----------|----------|----------|----------|----------|----------|----------|----------|
| All India          | -1.7     | +2.8     | +4.6(*)  | +3.2     | +3.6     | +2.1     | +10(*)   | +2.3     |
| Barak              | -33.2(*) | -9.9     | -0.8     | -11.3    | -5.9     | -16.4(*) | -4.6     | -12.2    |
| Brahmaputra        | -19(*)   | -3.4     | -2.3     | -19.1(*) | -13.3    | -13.9(*) | -0.9     | -7.5     |
| Ganga              | -4       | -2.4     | +1.2     | +1.7     | +0.8     | +2.6     | +8.5(*)  | -4.1     |
| Indus              | -12.2(*) | +7.2(*)  | +1.1     | -6(*)    | -4.4     | -3.2     | +13.2(*) | -1.2     |
| Minor              | -8.3     | -7.3     | +0.2     | -6.3     | -3.8     | -7.9     | -2.3     | -9.4     |
| North Ladakh       | -28.7(*) | +2.3     | +1.1(*)  | 0        | +0.8     | +0.1     | +8.6     | -0.1     |
| WFR Kutch          | +5.8(*)  | +6.5(*)  | +5.1(*)  | +5.5(*)  | +6.8(*)  | +4.4     | +14.1(*) | +3.9     |
| Brahmani-Baitarani | -1.6     | +1.3     | +4.2     | +3.7     | +6       | +0.7     | +2.7     | +1.1     |
| Cauvery            | +6       | +8.4(*)  | +11(*)   | +10.8(*) | +4.3     | +6.6(*)  | +13.6(*) | +4.8     |
| EFR North          | -0.5     | +1.4     | +4.8     | +6.9     | +5       | +5.1     | +7.6     | -0.1     |
| EFR South          | +7.4     | +4.3     | +11(*)   | +7(*)    | +4.7     | +5.7     | +19(*)   | +3.7     |
| Godavari           | +1       | -0.7     | +5.7     | +5.6     | +9(*)    | +2.2     | +5       | +3.5     |
| Krishna            | +3.7     | +1.7     | +6.1     | +8.5(*)  | +7.2(*)  | +5       | +13.2(*) | +6.8     |
| Mahanadi           | +2.6     | +2.3     | +5.3     | +7.9     | +7.7     | +5       | -0.1     | +4.7     |
| Mahi               | +7       | +6.1     | +11.3(*) | +12.1(*) | +16.8(*) | +9.8(*)  | +17.7(*) | +9.6(*)  |
| Narmada            | +3.9     | +3.9     | +9.8(*)  | +8.4     | +11.9(*) | +5.7     | +14(*)   | +4.8     |
| Pennar             | -0.8     | +3.5     | +4.3     | +4       | +4.5     | +3.2     | +12.4(*) | +3.1     |
| Sabarmati          | +12.5(*) | +9.8(*)  | +13.6(*) | +14.7(*) | +18.1(*) | +13.1(*) | +21.2(*) | +11.3(*) |
| Subernarekha       | +0.5     | +0.7     | +3.4     | +2.4     | +3.3     | +1.1     | +3.4     | -0.9     |
| Tapi               | +3.5     | +4.4     | +8.9(*)  | +9.1(*)  | +8.9(*)  | +5.7     | +12.3(*) | +4.9     |
| WFR North          | +8.6     | +17.2(*) | +21.7(*) | +17(*)   | +22.7(*) | +17.3(*) | +22.1(*) | +36.6(*) |
| WFR South          | +23.7(*) | +23(*)   | +28.9(*) | +21.4(*) | +18.9(*) | +18.4(*) | +35.1(*) | +16.3    |

## S3 Evapotranspiration

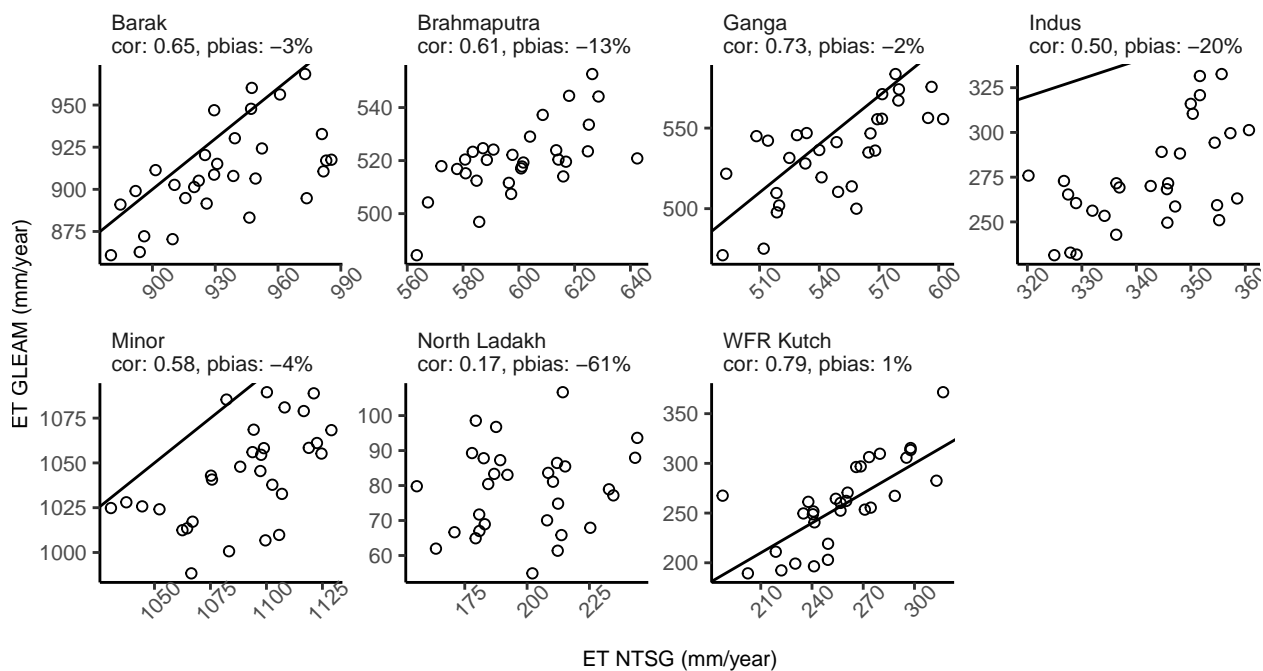

Figure S40: Basin-averaged annual ET from NTSG and GLEAM for the major river basins of Northern India, for the overlap period of WY 1982-2012. The solid line shows the 1:1 correspondence line. 'cor' indicates the Spearman rank correlation, while 'pbias' is the percent bias (GLEAM relative to NTSG).



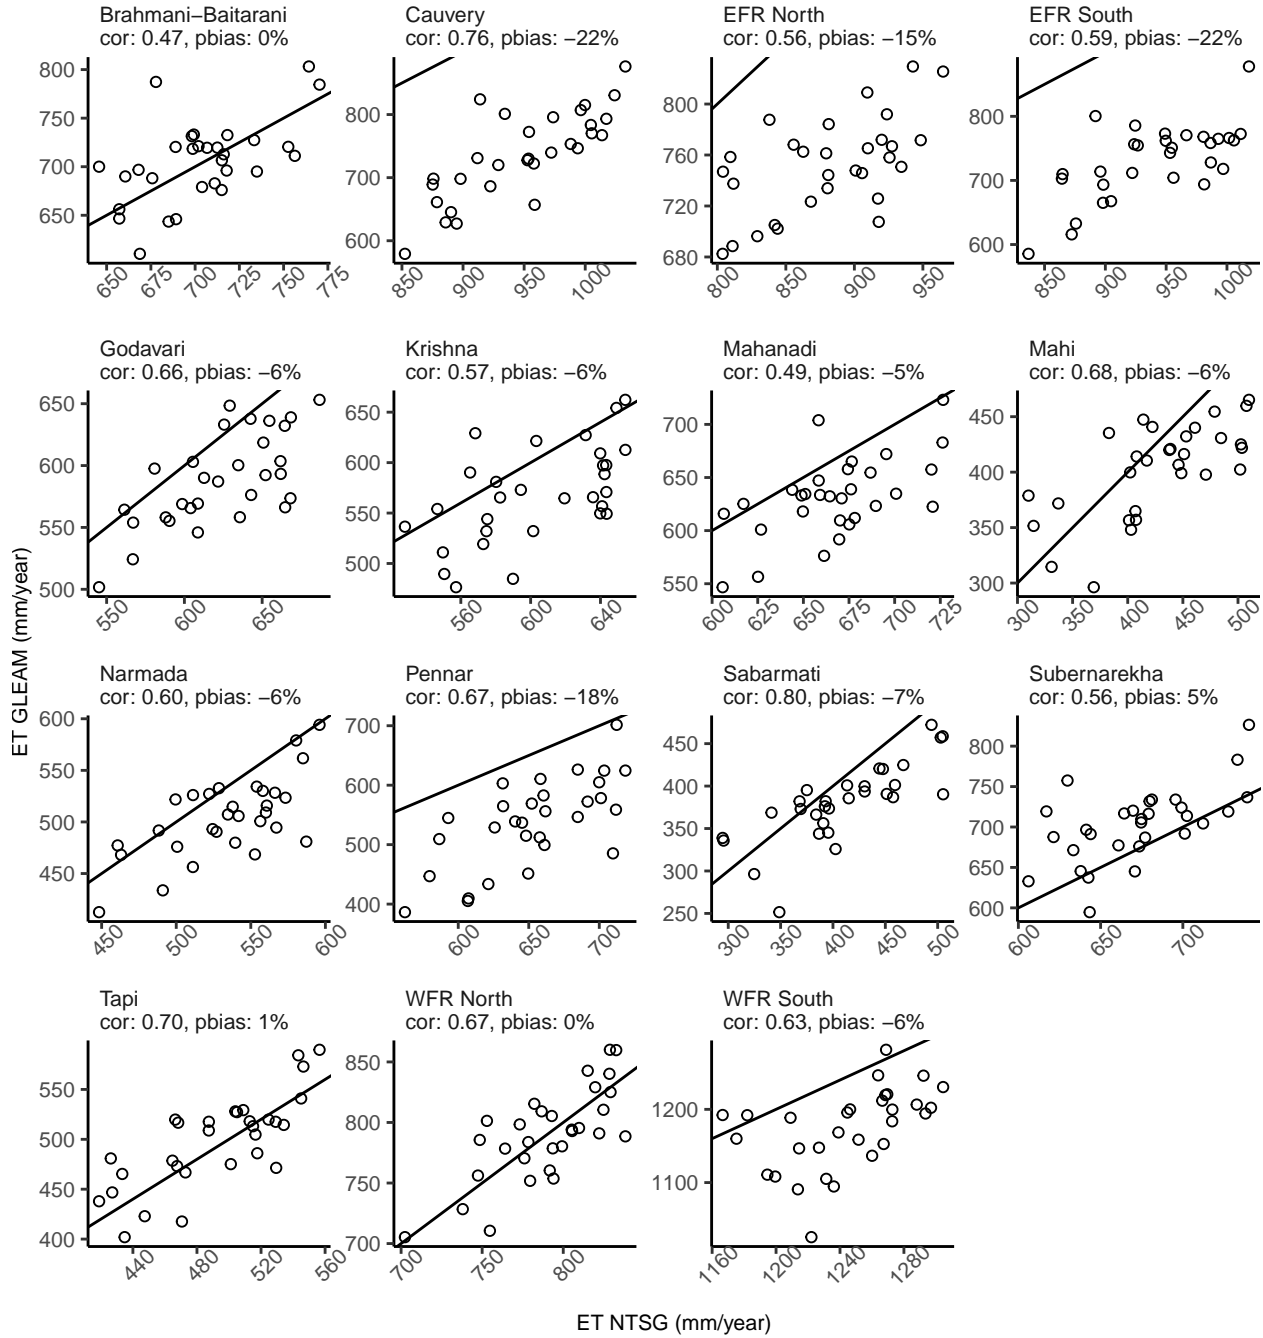

Figure S41: Basin-averaged annual ET from NTSG and GLEAM for the major river basins of Peninsular India, for the overlap period of WY 1982-2012. The solid line shows the 1:1 correspondence line. 'cor' indicates the Spearman rank correlation, while 'pbias' is the percent bias (GLEAM relative to NTSG).

## S4 Effect of different heuristics on Scenario II

Scenario II: 0.60, 1.10

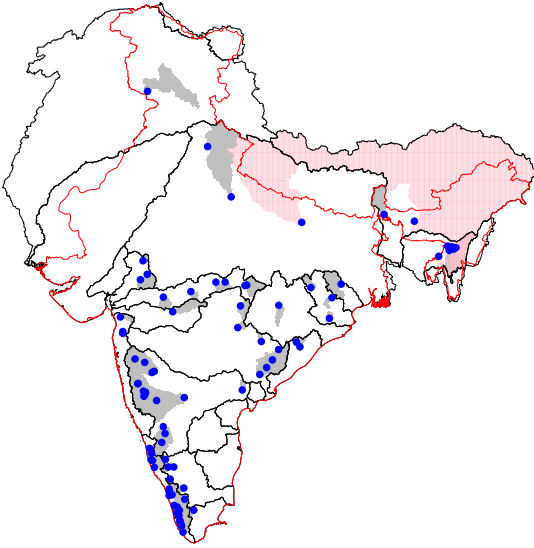

Scenario II: 0.70, 1.20

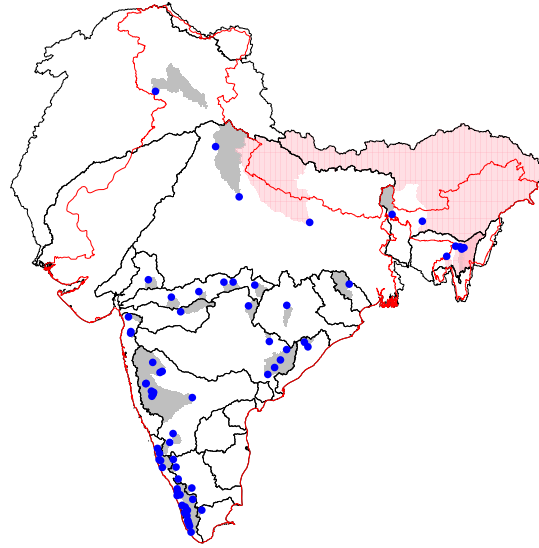

Scenario II: 0.80, 1.30

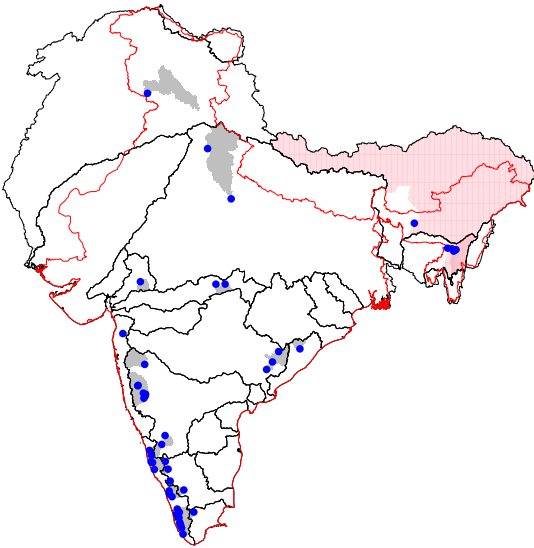

Scenario II: 0.90, 1.40

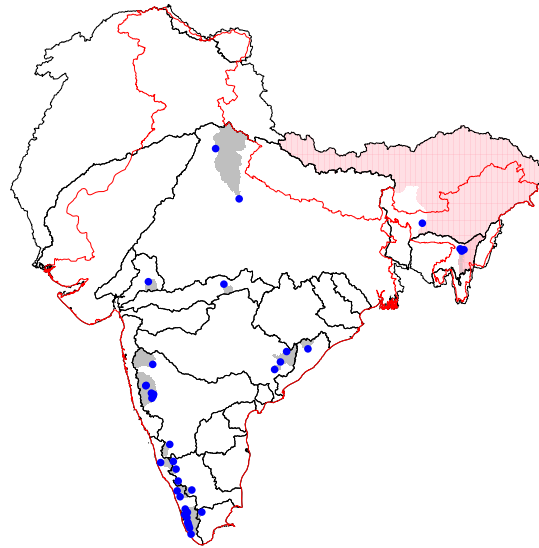

Figure S42: Watersheds where Scenario II is realized when using different sets of heuristics within Eq. 5.

Table S3: Same as Table 3 in the paper, except for heuristics of 0.60 and 1.10 in Scenario II.

| Product   | North India |            |             |                | Peninsular India |            |             |                |
|-----------|-------------|------------|-------------|----------------|------------------|------------|-------------|----------------|
|           | Total       | Scenario I | Scenario II | % Off-balanced | Total            | Scenario I | Scenario II | % Off-balanced |
| APHRO     | 782         | 92         | 112         | 26.1%          | 5,788            | 349        | 624         | 16.8%          |
| CHIRPS    | 782         | 76         | 62          | 17.6%          | 6,036            | 306        | 515         | 13.6%          |
| CMORPH    | 436         | 61         | 63          | 28.4%          | 3,493            | 315        | 281         | 17.1%          |
| ERA5      | 782         | 7          | 91          | 12.5%          | 6,153            | 245        | 489         | 11.9%          |
| GSMAP     | 382         | 76         | 52          | 33.5%          | 3,132            | 441        | 222         | 21.2%          |
| IMD-APHRO | 782         | 32         | 104         | 17.4%          | 6,153            | 414        | 542         | 15.5%          |
| IMDAA     | 782         | 8          | 24          | 4.1%           | 6,153            | 179        | 434         | 10.0%          |
| IMERG     | 382         | 19         | 39          | 15.2%          | 3,132            | 169        | 264         | 13.8%          |
| MSWEP     | 782         | 60         | 95          | 19.8%          | 6,153            | 122        | 361         | 7.8%           |
| PERSIANN  | 782         | 89         | 93          | 23.3%          | 5,796            | 767        | 407         | 20.3%          |
| SM2RAIN   | 195         | 9          | 24          | 16.9%          | 1,784            | 116        | 132         | 13.9%          |
| TERRA     | 782         | 75         | 98          | 22.1%          | 6,153            | 153        | 451         | 9.8%           |

Table S4: Same as Table 3 in the paper, except for heuristics of 0.80 and 1.30 in Scenario II.

| Product   | North India |            |             |                | Peninsular India |            |             |                |
|-----------|-------------|------------|-------------|----------------|------------------|------------|-------------|----------------|
|           | Total       | Scenario I | Scenario II | % Off-balanced | Total            | Scenario I | Scenario II | % Off-balanced |
| APHRO     | 782         | 92         | 40          | 16.9%          | 5,788            | 349        | 203         | 9.5%           |
| CHIRPS    | 782         | 76         | 25          | 12.9%          | 6,036            | 306        | 150         | 7.5%           |
| CMORPH    | 436         | 61         | 18          | 18.1%          | 3,493            | 315        | 113         | 12.2%          |
| ERA5      | 782         | 7          | 16          | 2.9%           | 6,153            | 245        | 139         | 6.2%           |
| GSMAP     | 382         | 76         | 27          | 27.0%          | 3,132            | 441        | 84          | 16.8%          |
| IMD-APHRO | 782         | 32         | 28          | 7.7%           | 6,153            | 414        | 206         | 10.1%          |
| IMDAA     | 782         | 8          | 4           | 1.5%           | 6,153            | 179        | 102         | 4.6%           |
| IMERG     | 382         | 19         | 7           | 6.8%           | 3,132            | 169        | 83          | 8.1%           |
| MSWEP     | 782         | 60         | 23          | 10.6%          | 6,153            | 122        | 89          | 3.4%           |
| PERSIANN  | 782         | 89         | 43          | 16.9%          | 5,796            | 767        | 157         | 15.9%          |
| SM2RAIN   | 195         | 9          | 7           | 8.2%           | 1,784            | 116        | 39          | 8.7%           |
| TERRA     | 782         | 75         | 29          | 13.3%          | 6,153            | 153        | 102         | 4.1%           |

Table S5: Same as Table 3 in the paper, except for heuristics of 0.90 and 1.40 in Scenario II.

| Product   | North India |            |             |                | Peninsular India |            |             |                |
|-----------|-------------|------------|-------------|----------------|------------------|------------|-------------|----------------|
|           | Total       | Scenario I | Scenario II | % Off-balanced | Total            | Scenario I | Scenario II | % Off-balanced |
| APHRO     | 782         | 92         | 15          | 13.7%          | 5,788            | 349        | 79          | 7.4%           |
| CHIRPS    | 782         | 76         | 9           | 10.9%          | 6,036            | 306        | 44          | 5.8%           |
| CMORPH    | 436         | 61         | 6           | 15.4%          | 3,493            | 315        | 46          | 10.3%          |
| ERA5      | 782         | 7          | 2           | 1.1%           | 6,153            | 245        | 35          | 4.5%           |
| GSMAP     | 382         | 76         | 14          | 23.6%          | 3,132            | 441        | 37          | 15.3%          |
| IMD-APHRO | 782         | 32         | 11          | 5.5%           | 6,153            | 414        | 80          | 8.0%           |
| IMDAA     | 782         | 8          | 1           | 1.1%           | 6,153            | 179        | 30          | 3.4%           |
| IMERG     | 382         | 19         | 1           | 5.2%           | 3,132            | 169        | 34          | 6.5%           |
| MSWEP     | 782         | 60         | 10          | 8.9%           | 6,153            | 122        | 33          | 2.5%           |
| PERSIANN  | 782         | 89         | 17          | 13.6%          | 5,796            | 767        | 64          | 14.3%          |
| SM2RAIN   | 195         | 9          | 1           | 5.1%           | 1,784            | 116        | 19          | 7.6%           |
| TERRA     | 782         | 75         | 13          | 11.2%          | 6,153            | 153        | 32          | 3.0%           |

## S5 Annual Changes in TWS

Delta TWS, WY 2004

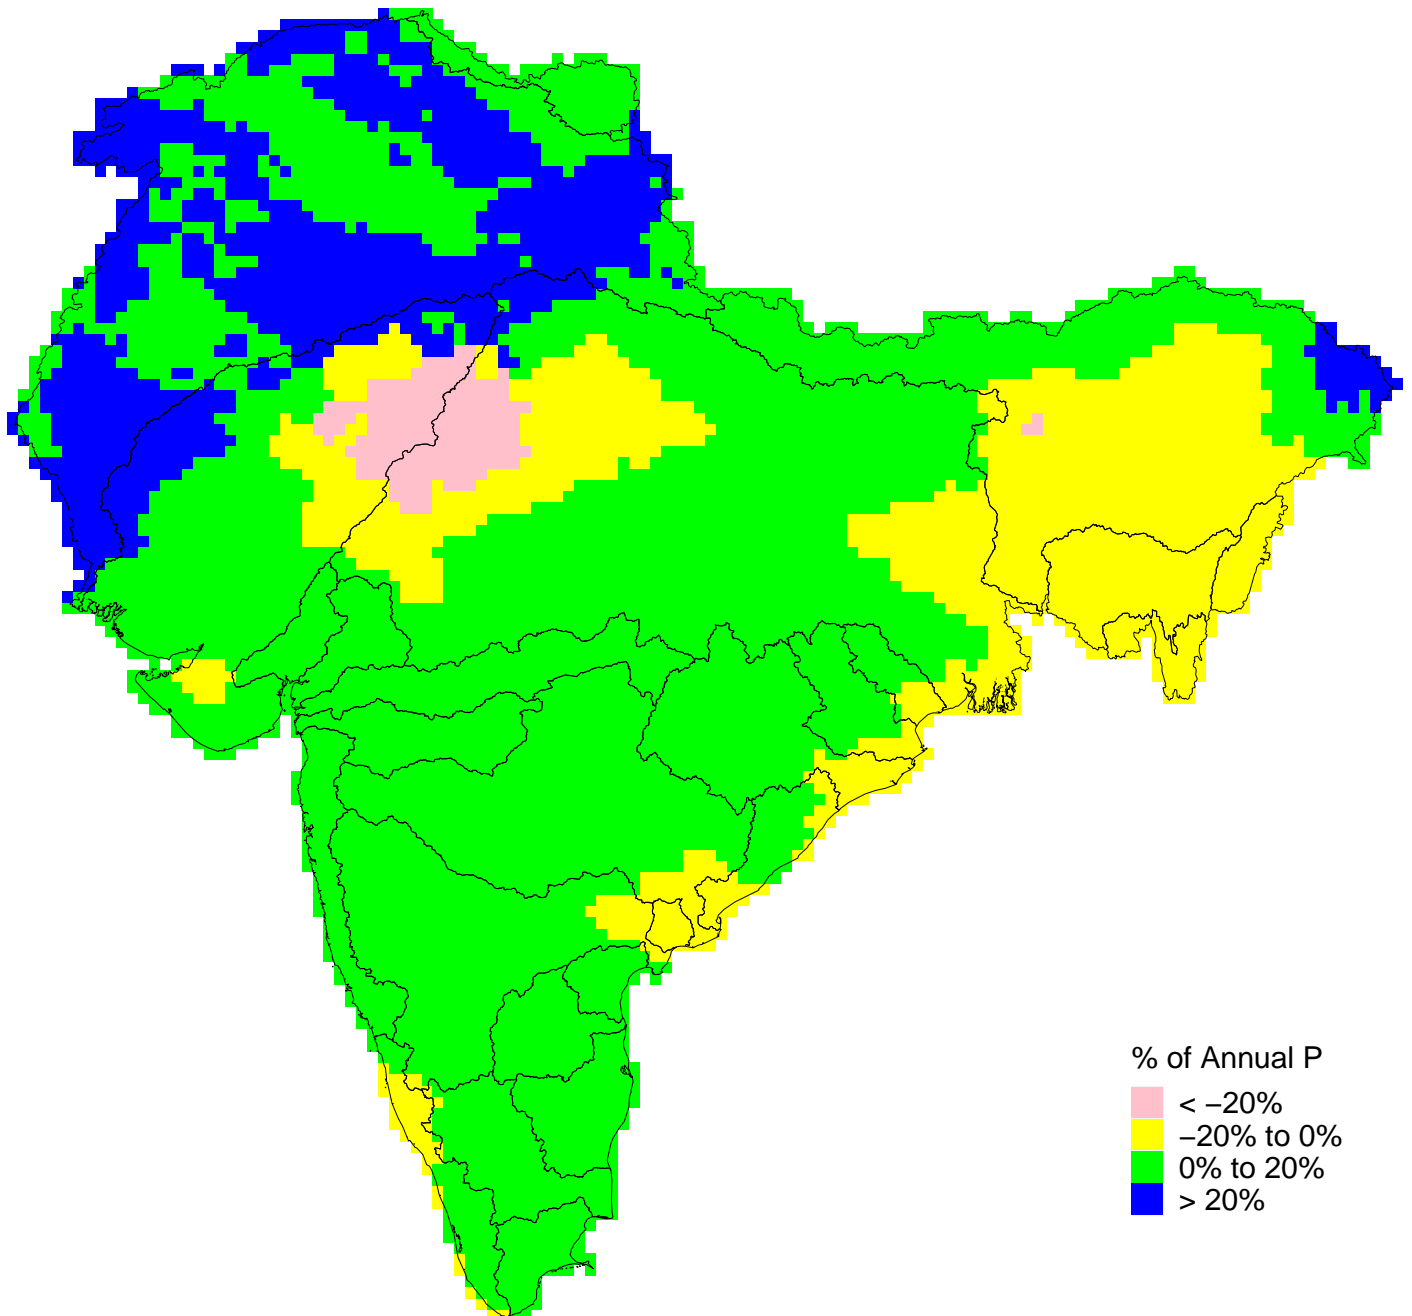

Delta TWS, WY 2005

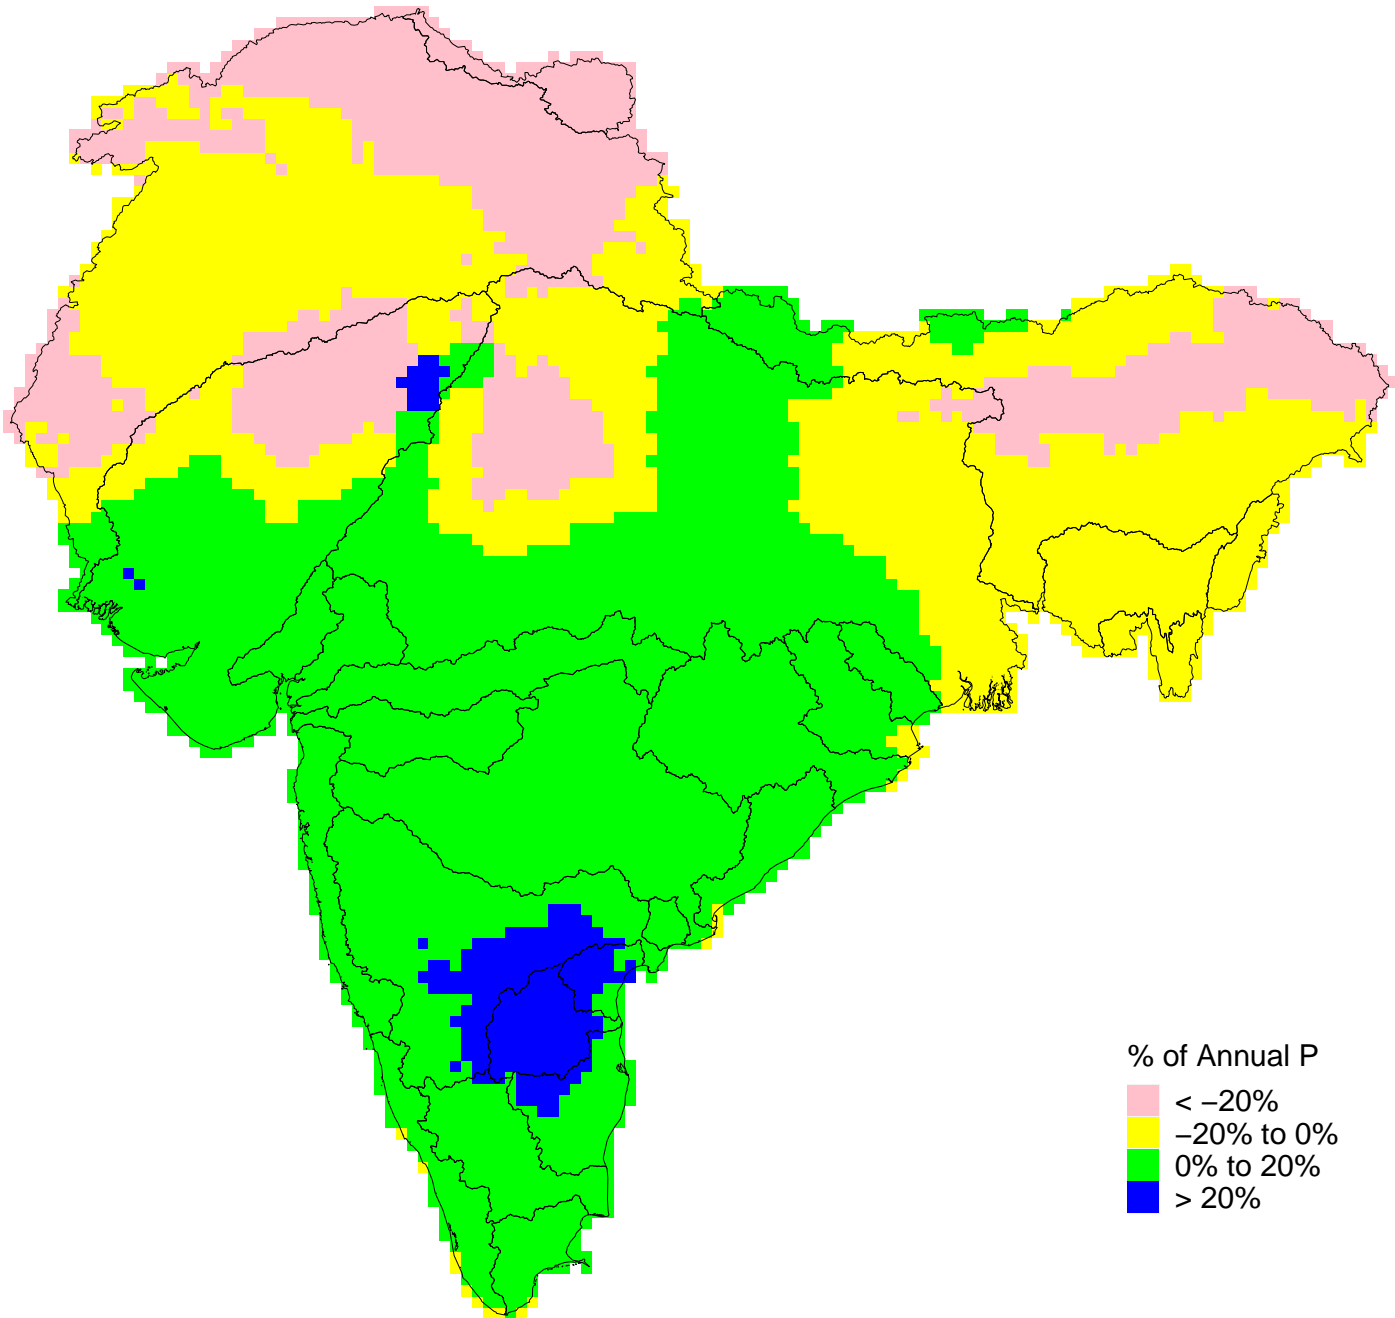

Delta TWS, WY 2006

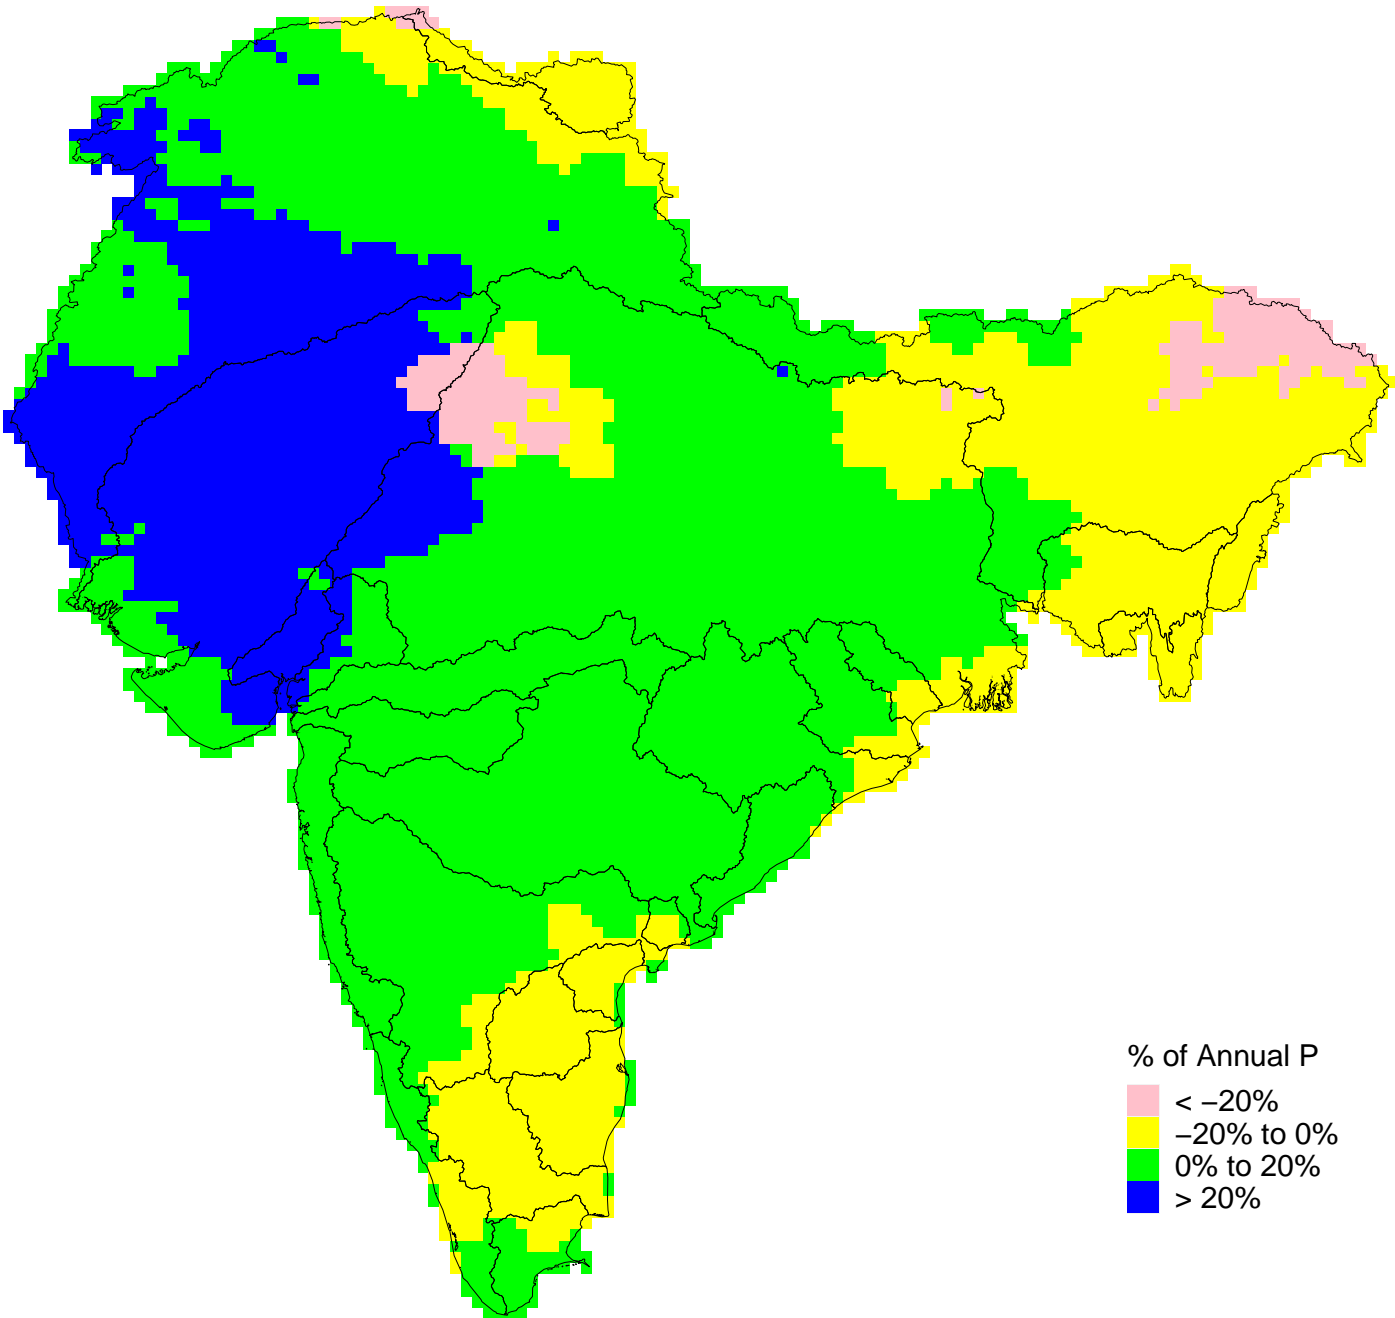

Delta TWS, WY 2007

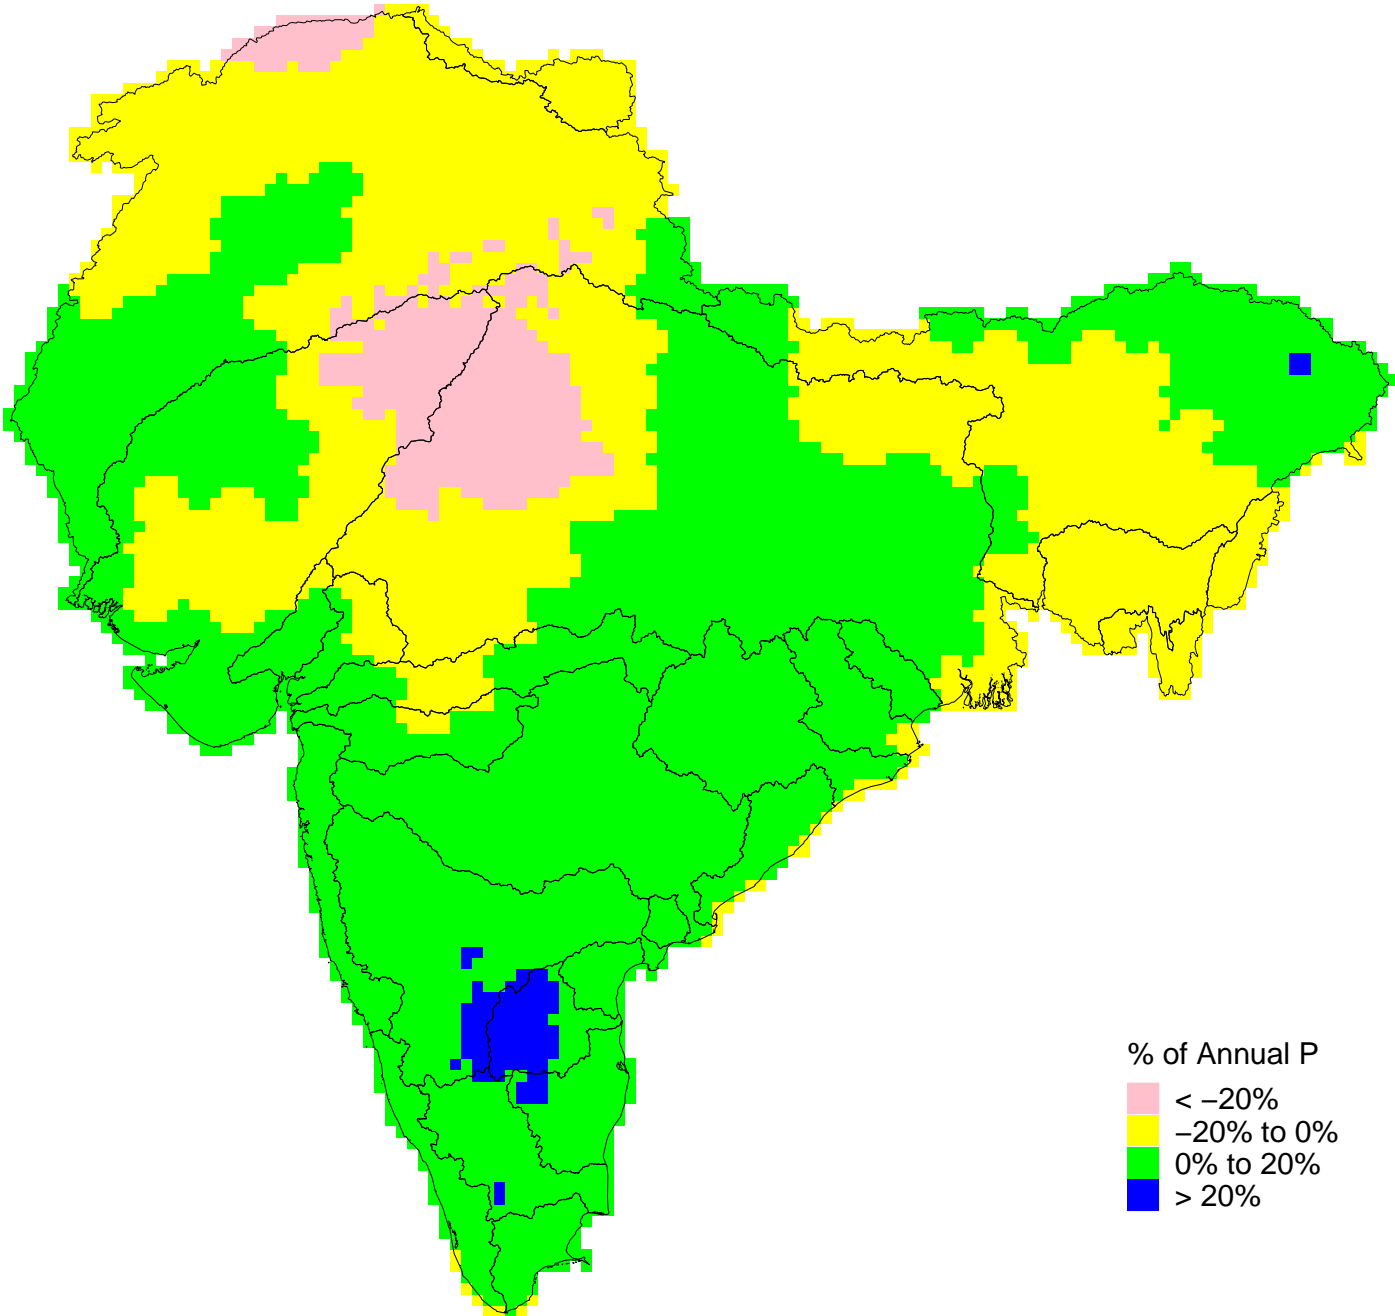

Delta TWS, WY 2008

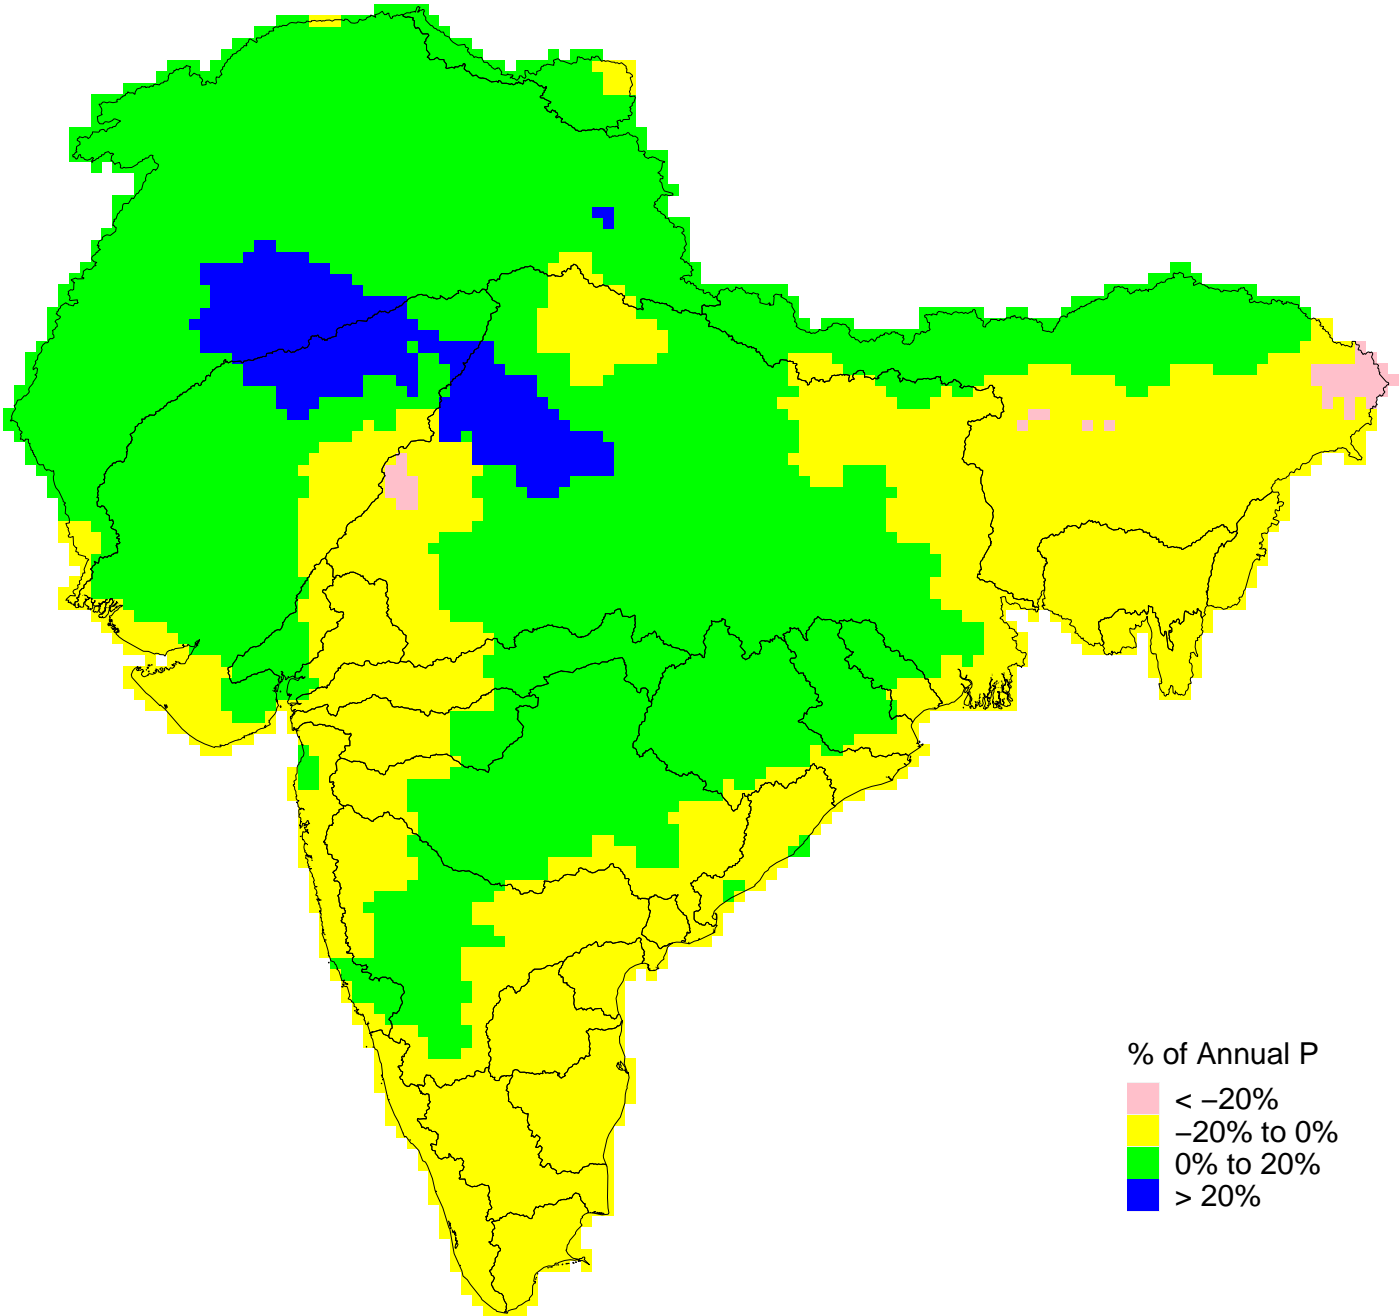



Delta TWS, WY 2009

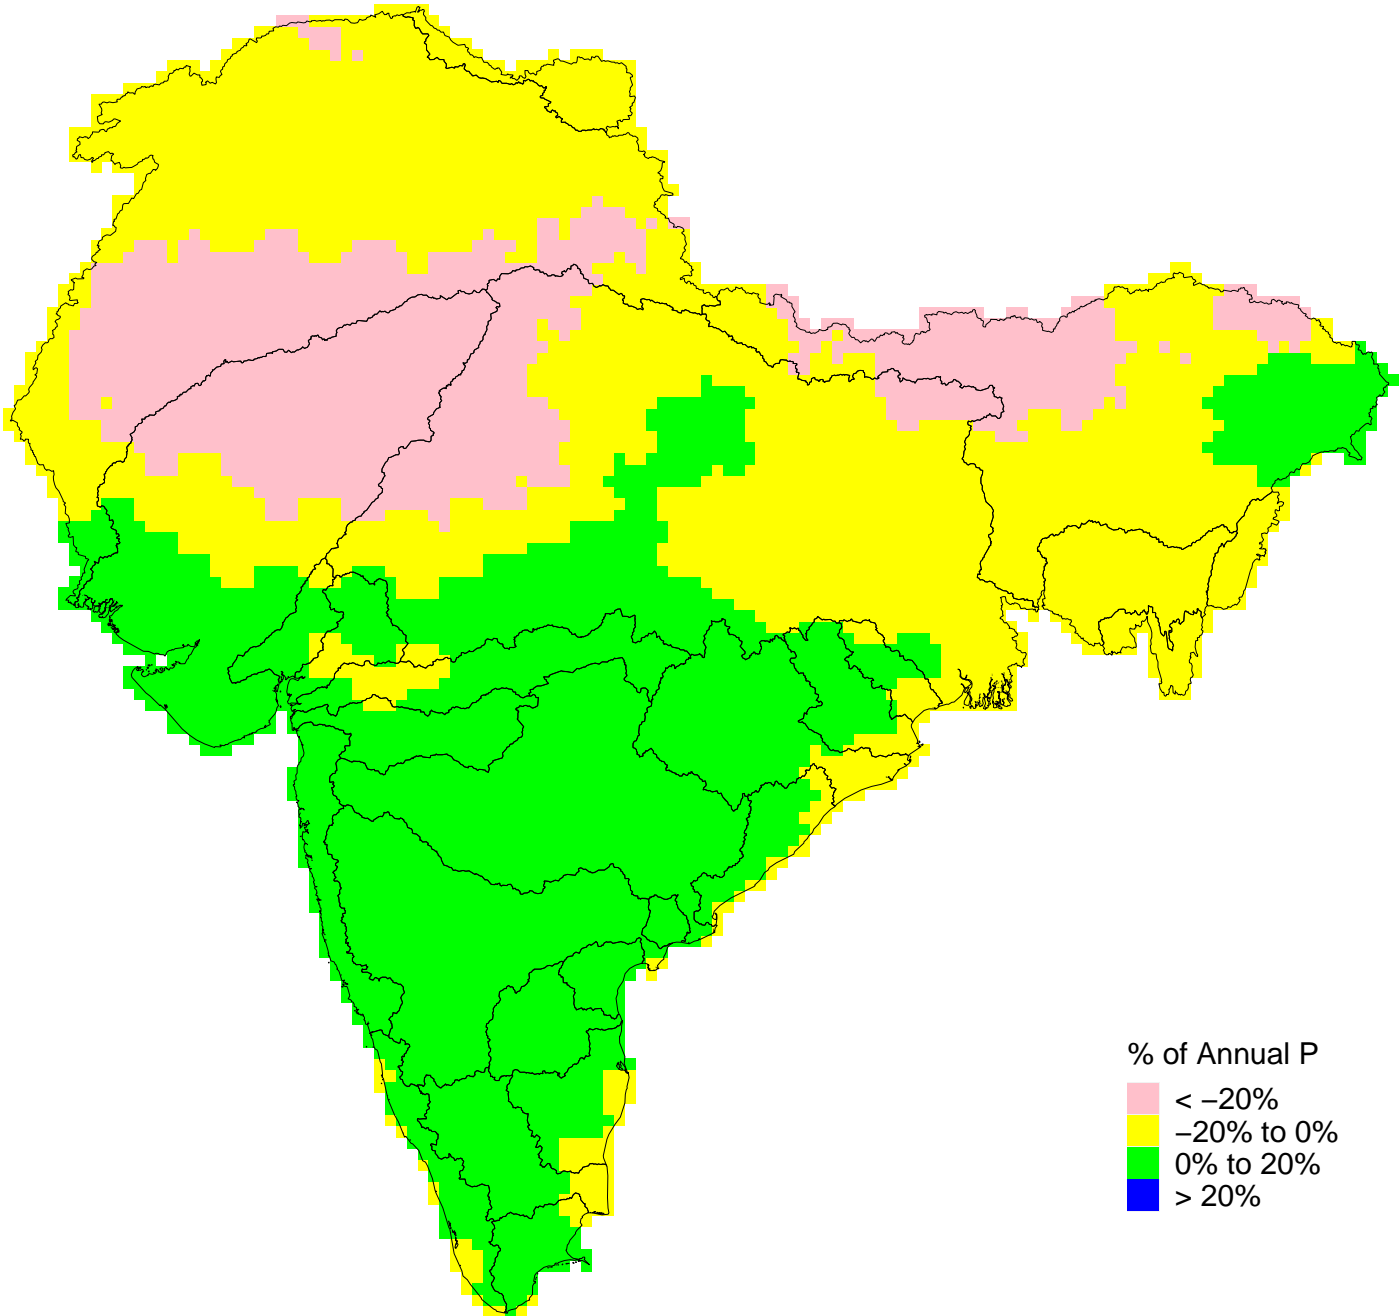

Delta TWS, WY 2010

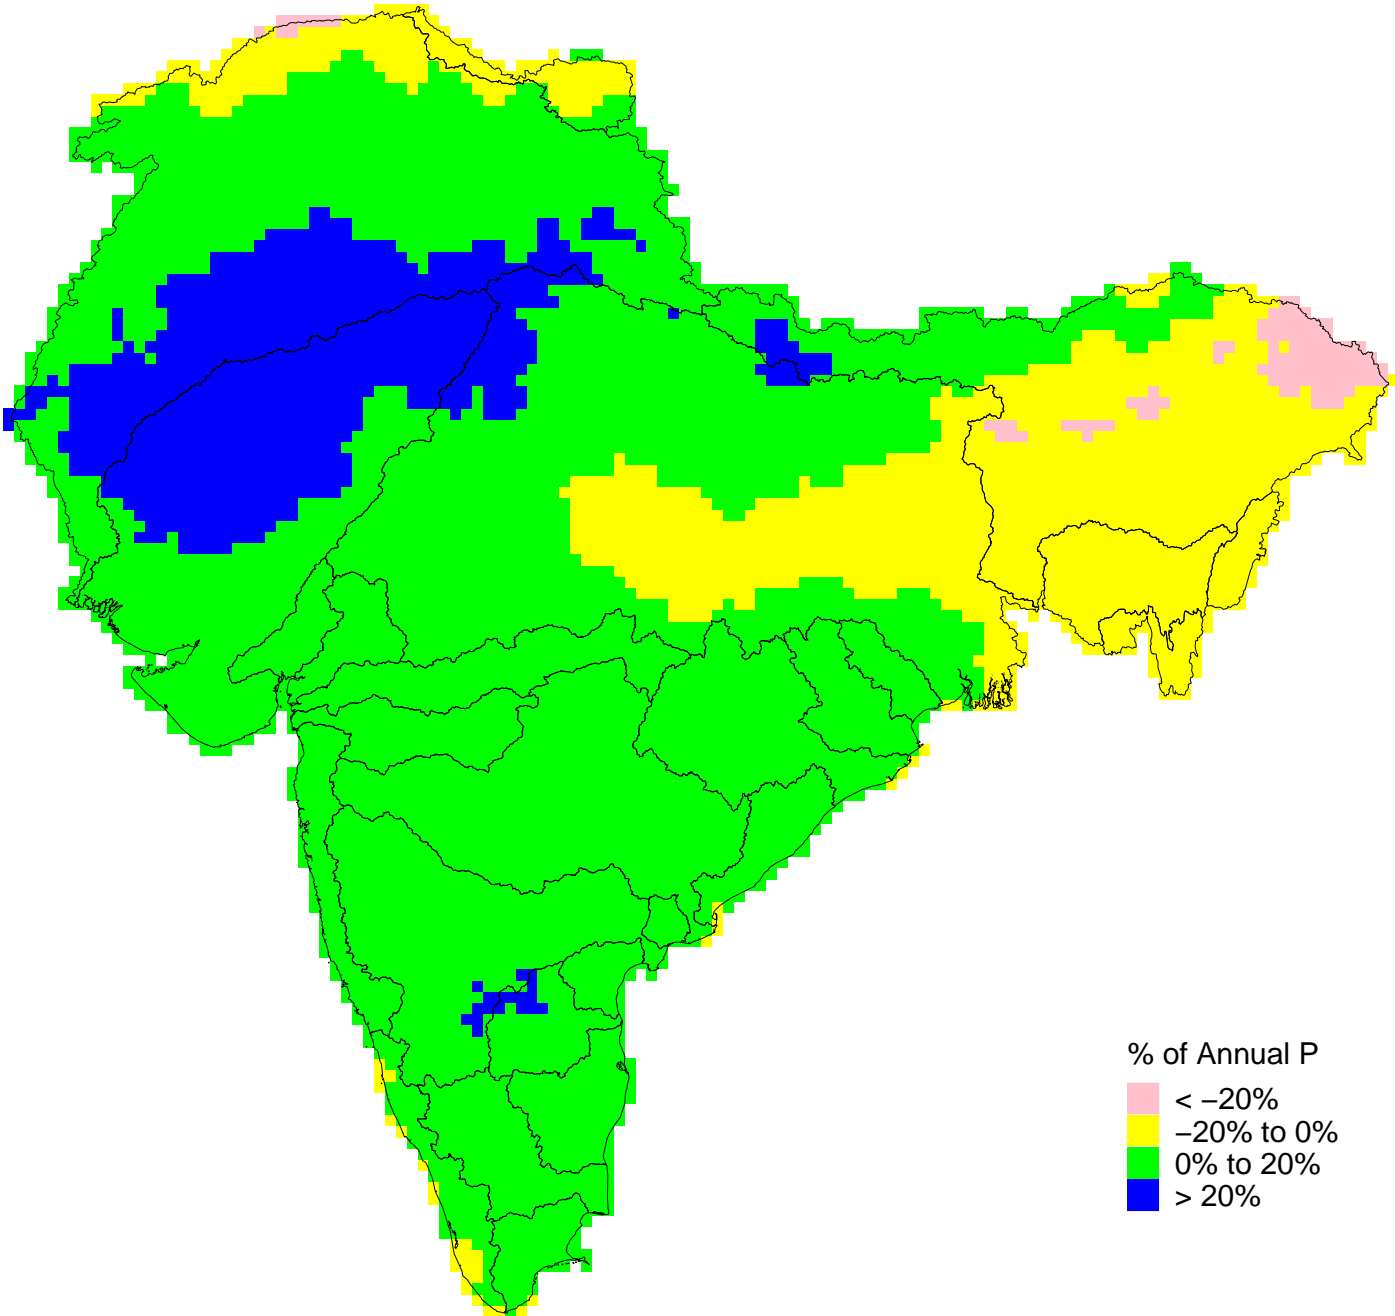

Delta TWS, WY 2012

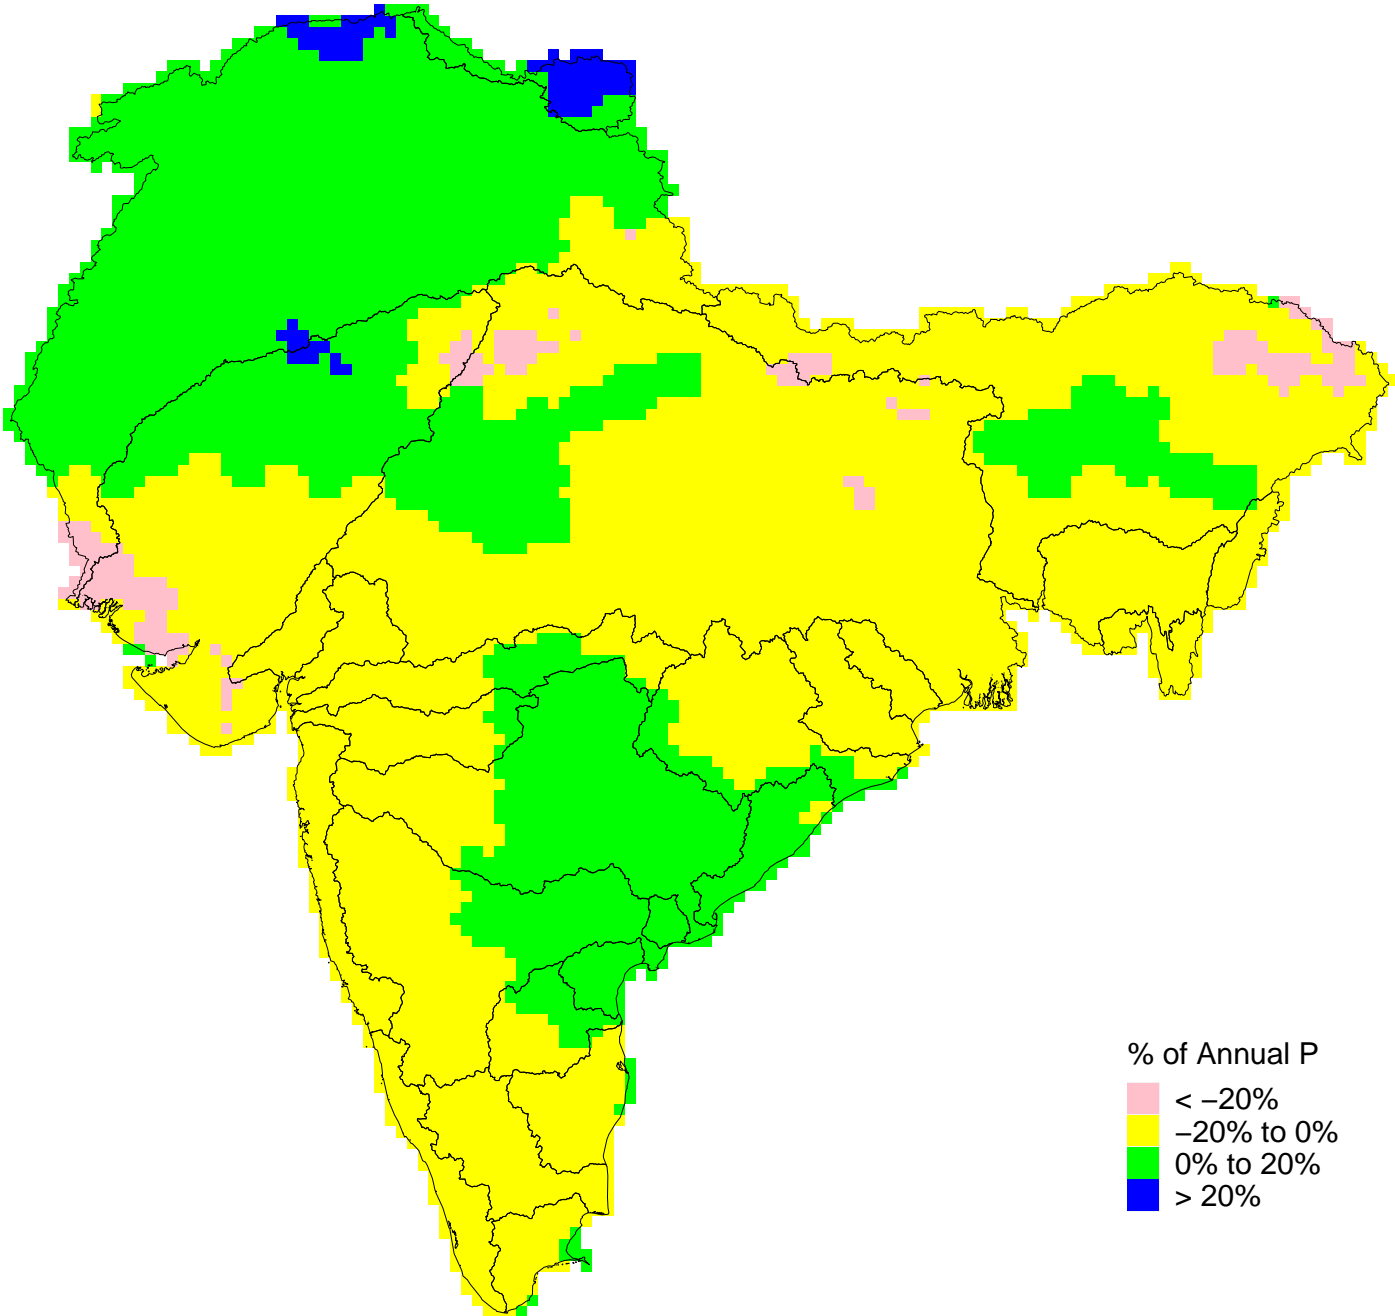

Delta TWS, WY 2013

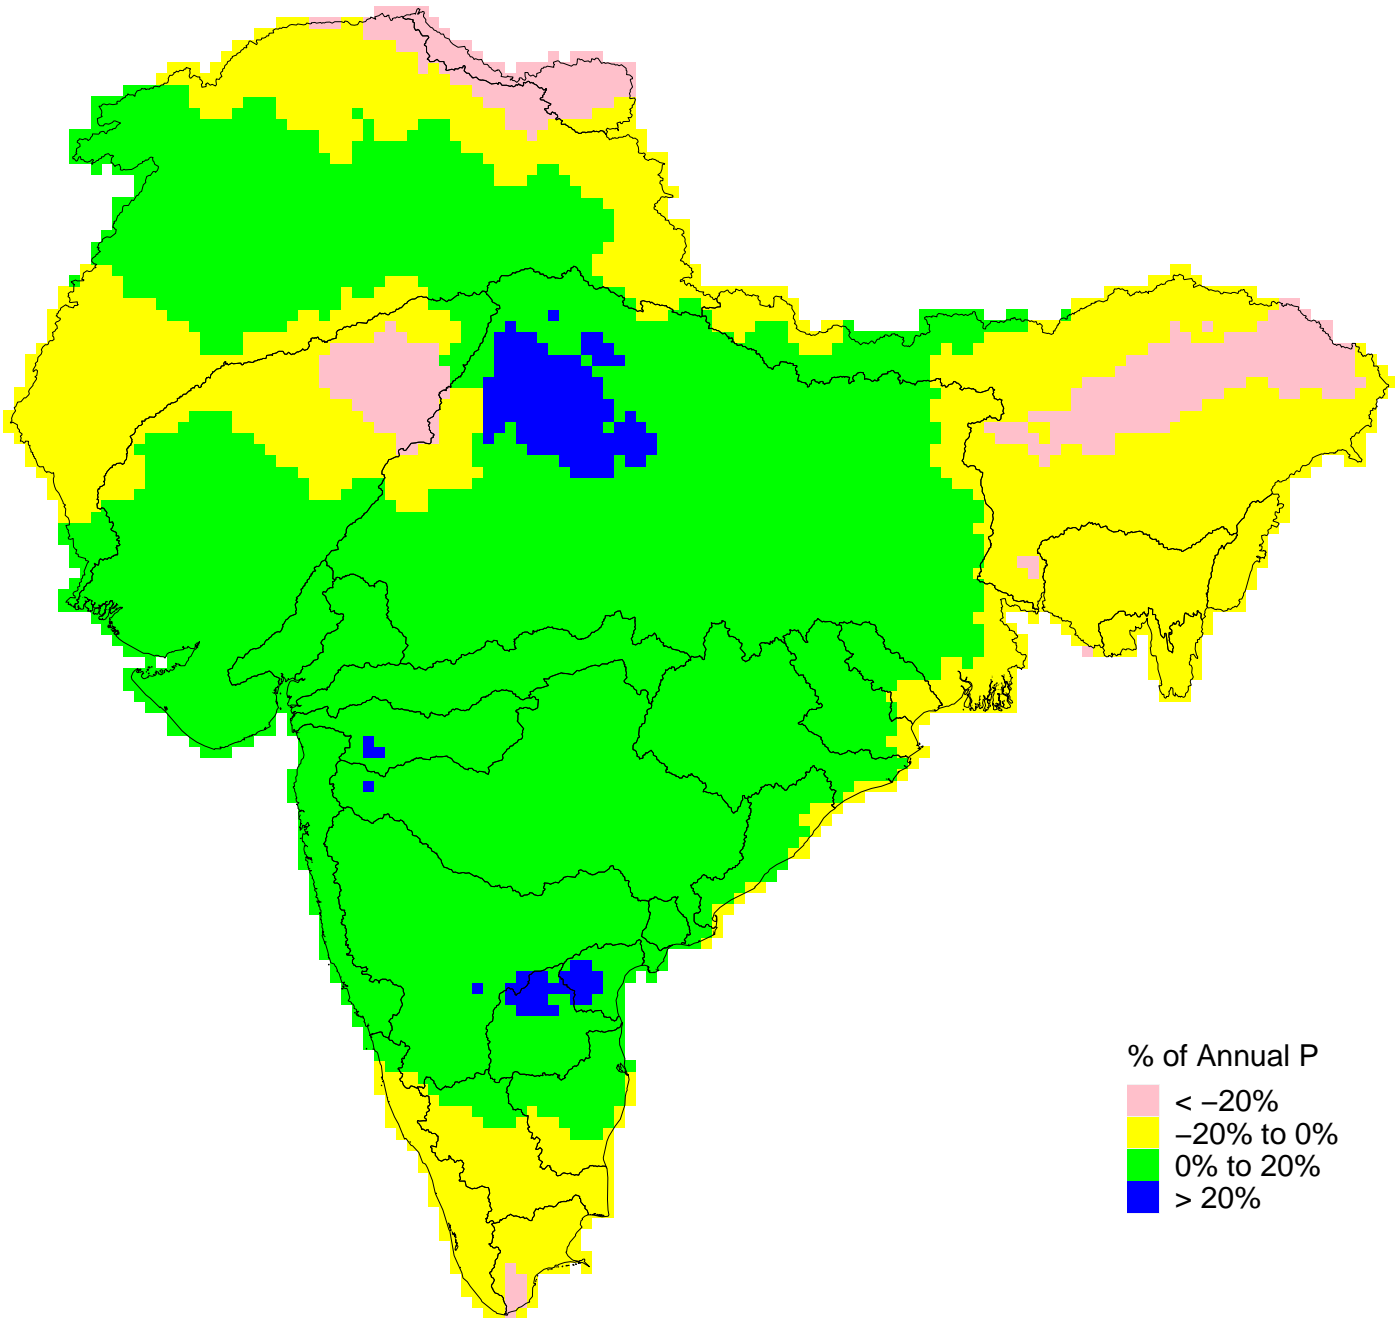

Delta TWS, WY 2014

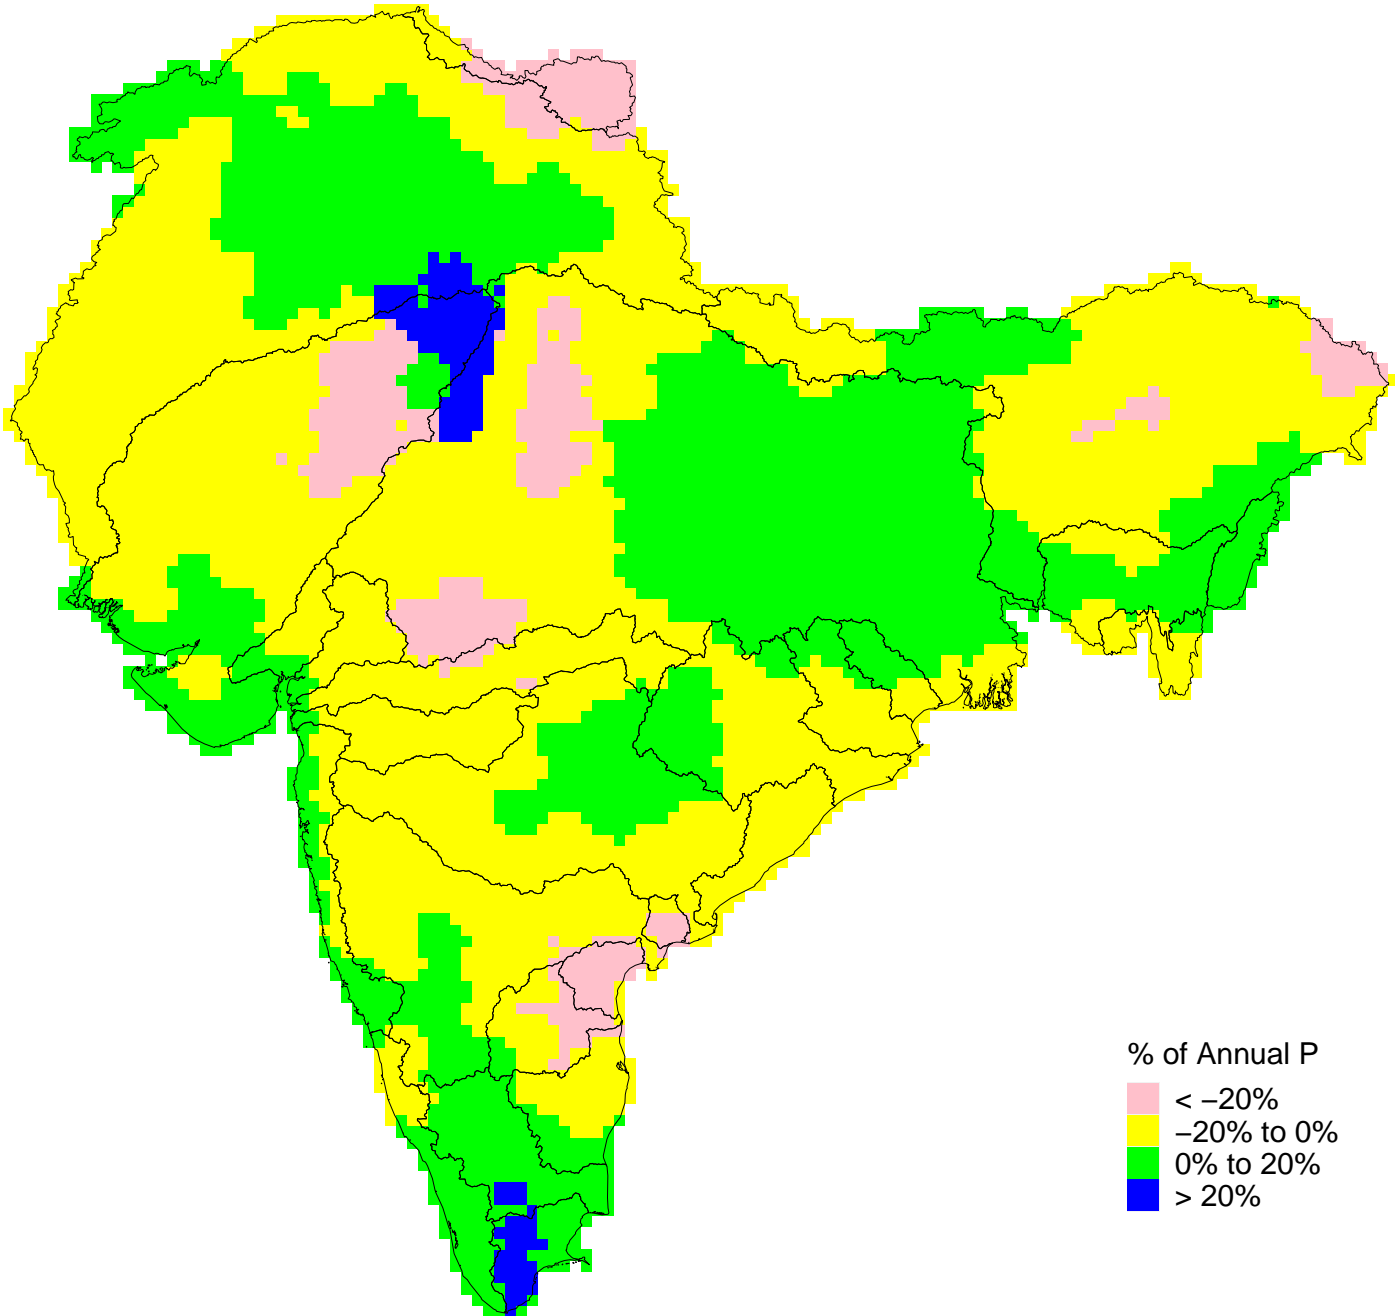

S6 Time series charts

Station: Kudige, River: Cauvery  
GHI ID: cauv\_kudig, Catch. Area: 1743 sq. km

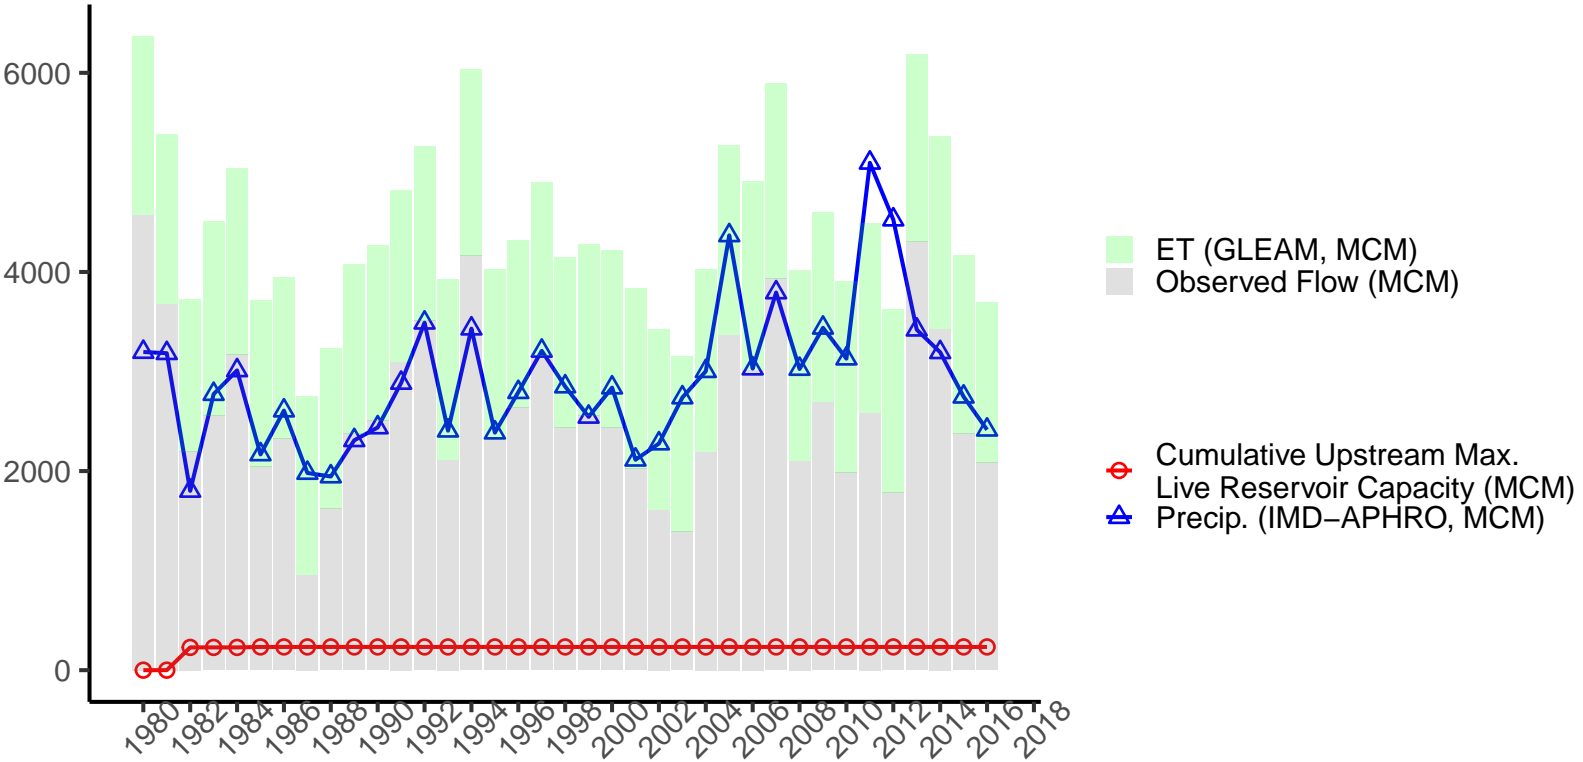

Station: Muthankera, River: Cauvery/Kabini  
GHI ID: cauv\_mutha, Catch. Area: 1235 sq. km

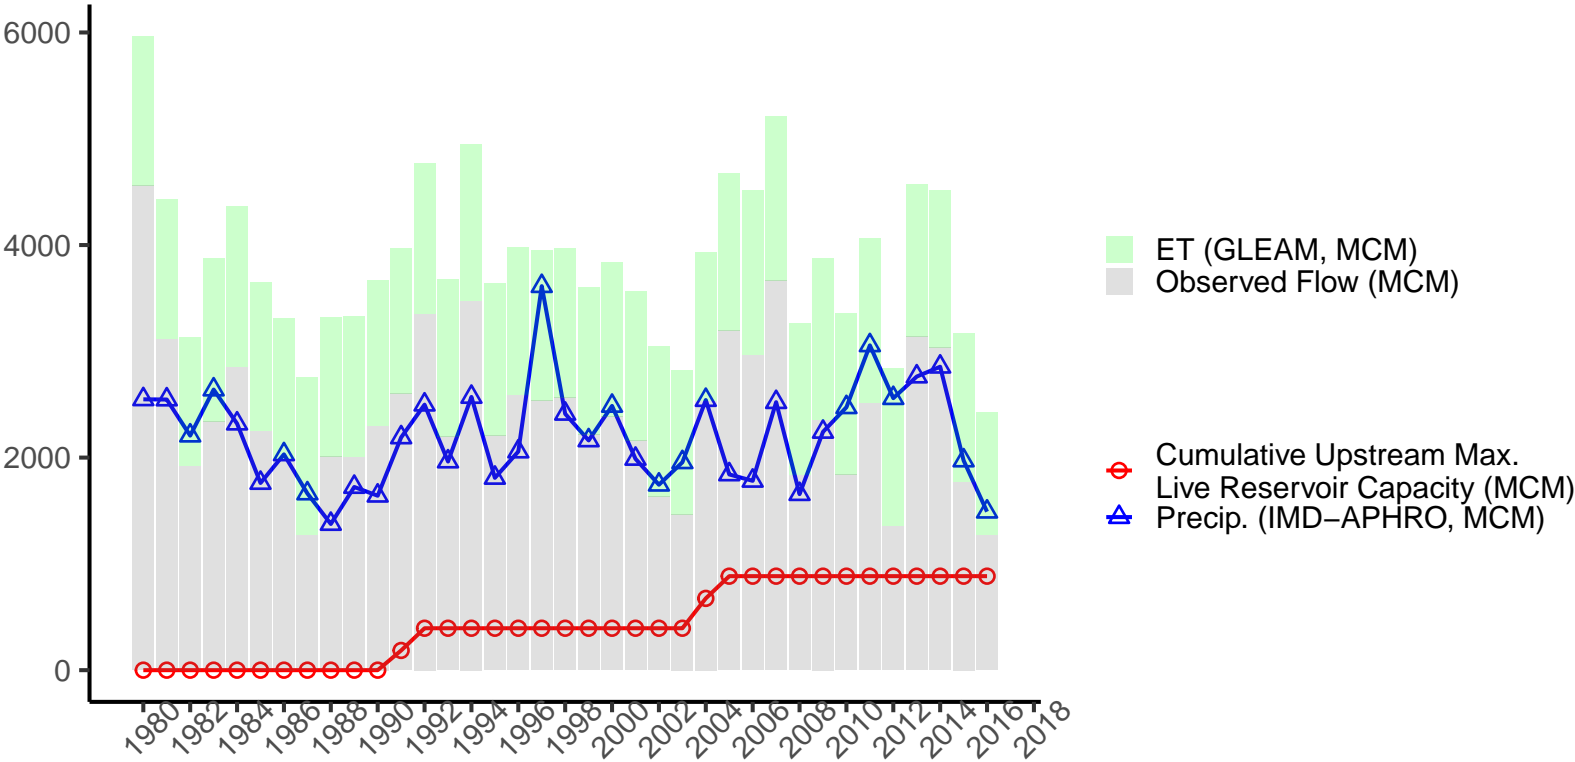

Station: Nellithurai, River: Cauvery/Bhavani  
GHI ID: cauv\_nelli, Catch. Area: 1499 sq. km

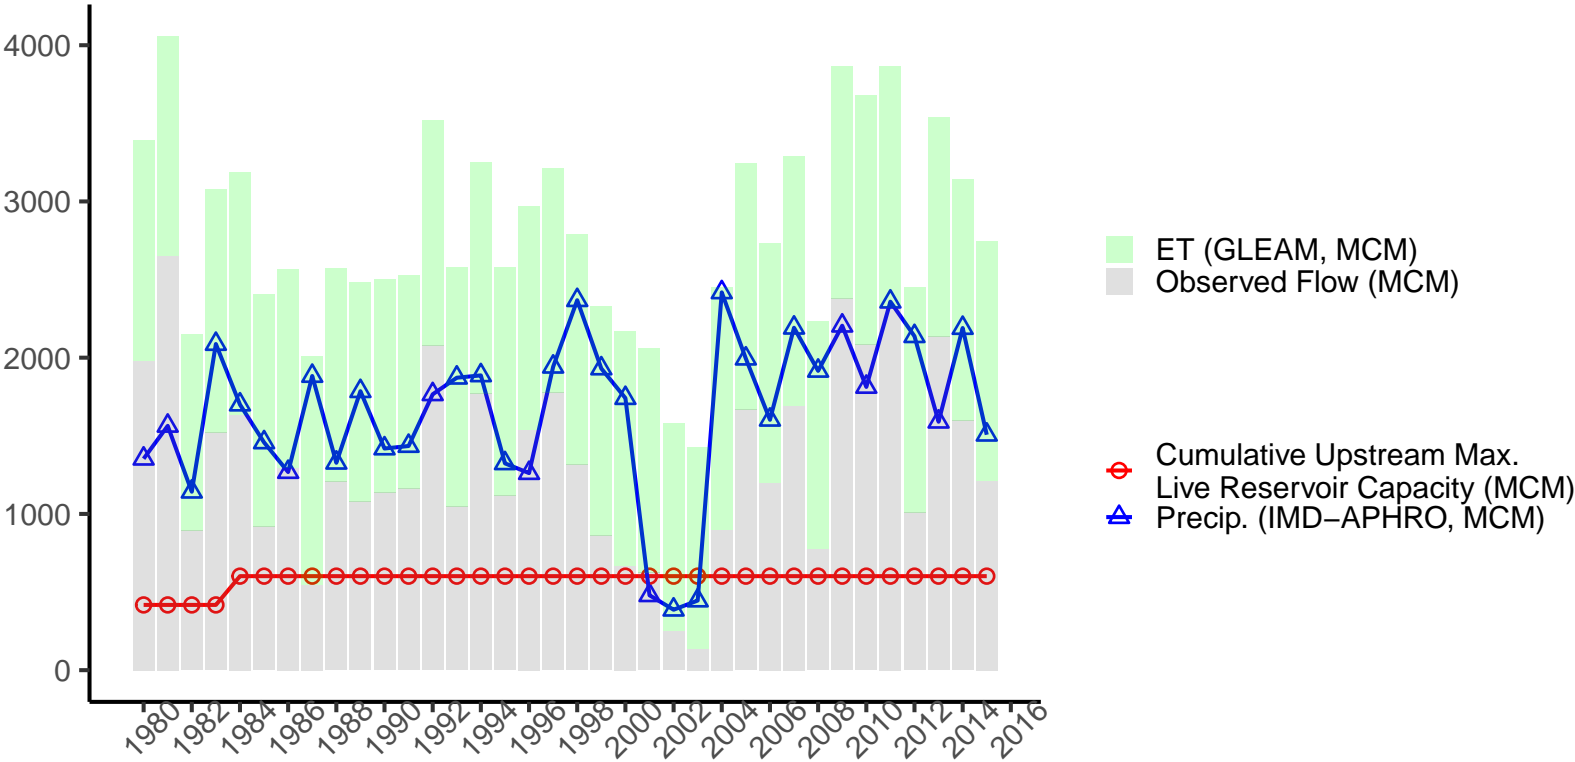



Station: Sakleshpur, River: Cauvery/Hemavati  
GHI ID: cauv\_sakle, Catch. Area: 616 sq. km

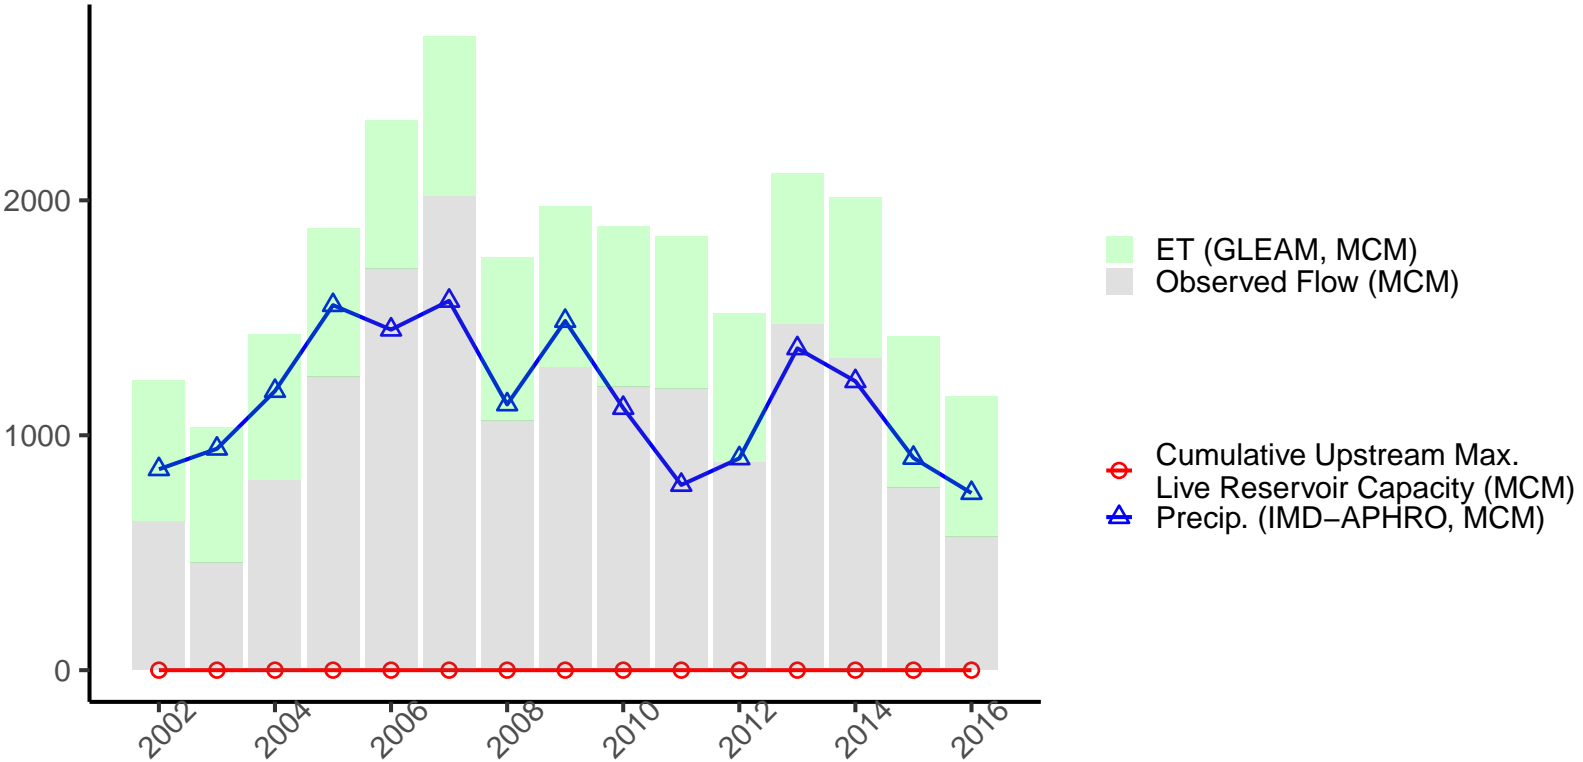

Station: Gudari, River: Vamsadhara  
GHI ID: efrn\_gudar, Catch. Area: 3147 sq. km

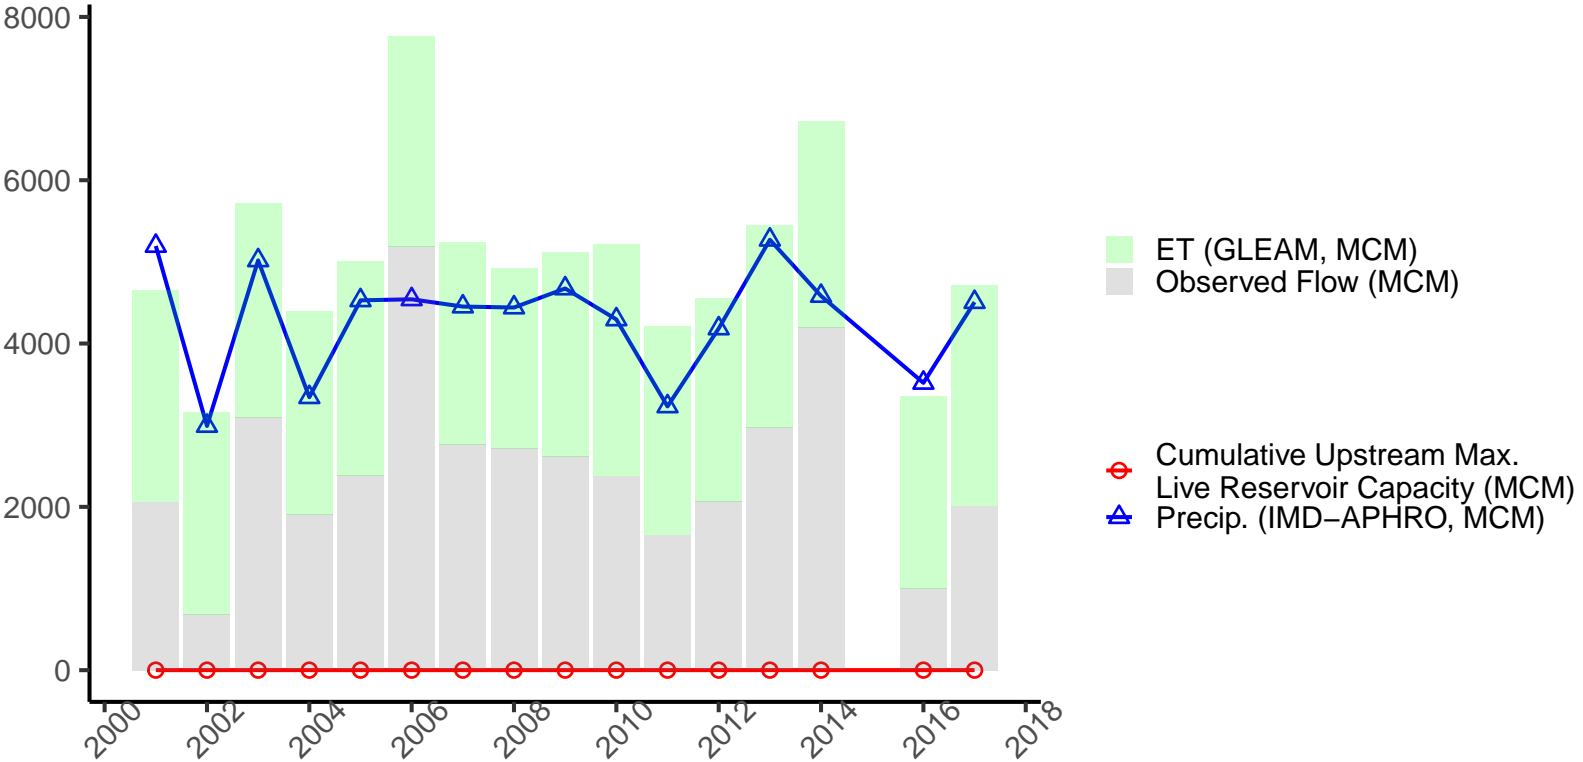

Station: Kutragada, River: Vamsadhara  
GHI ID: efrn\_kutra, Catch. Area: 1080 sq. km

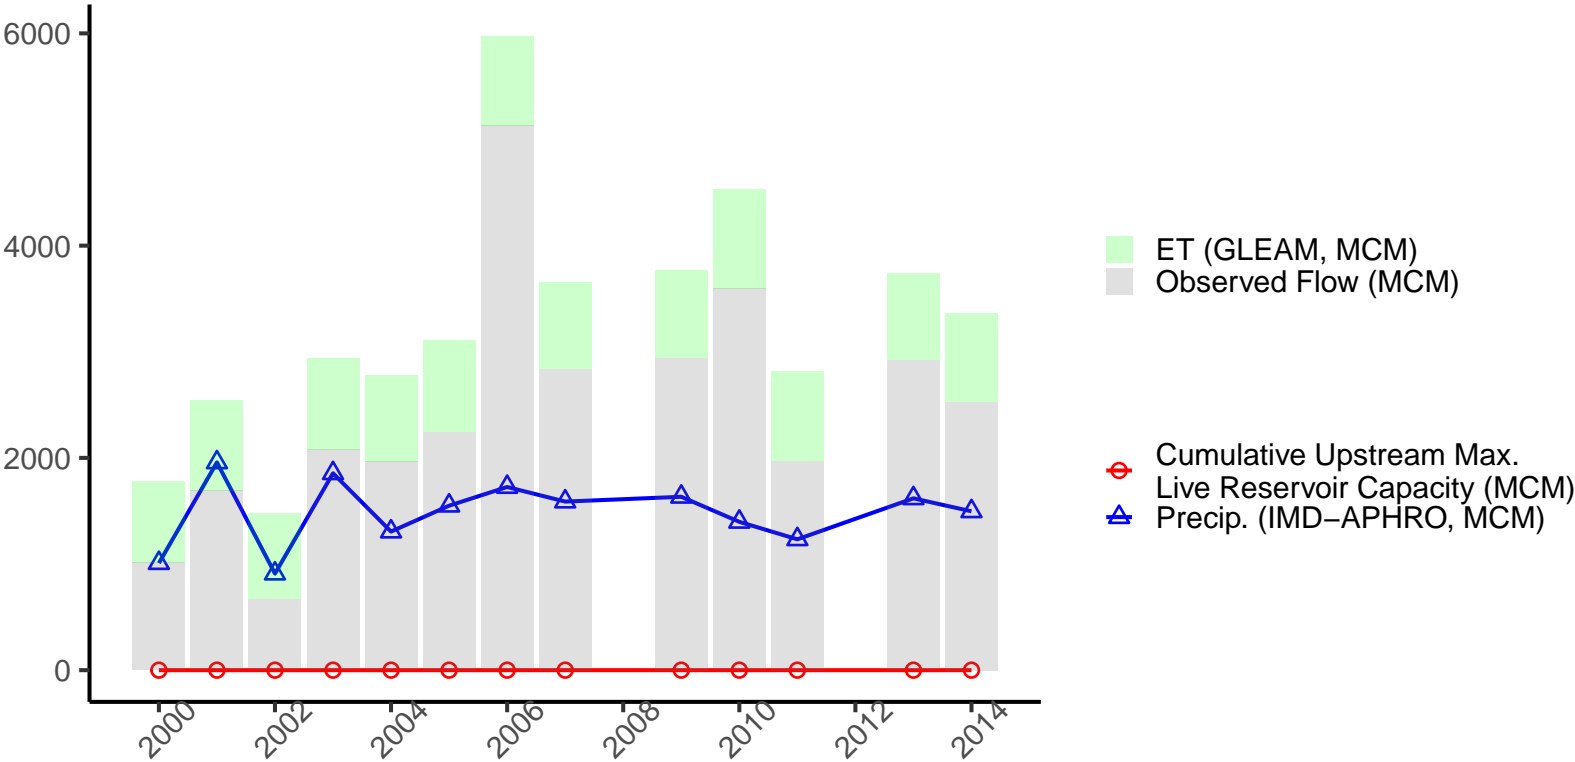

Station: Theni, River: Vaigai/Suruliar  
GHI ID: efrs\_theni, Catch. Area: 1364 sq. km

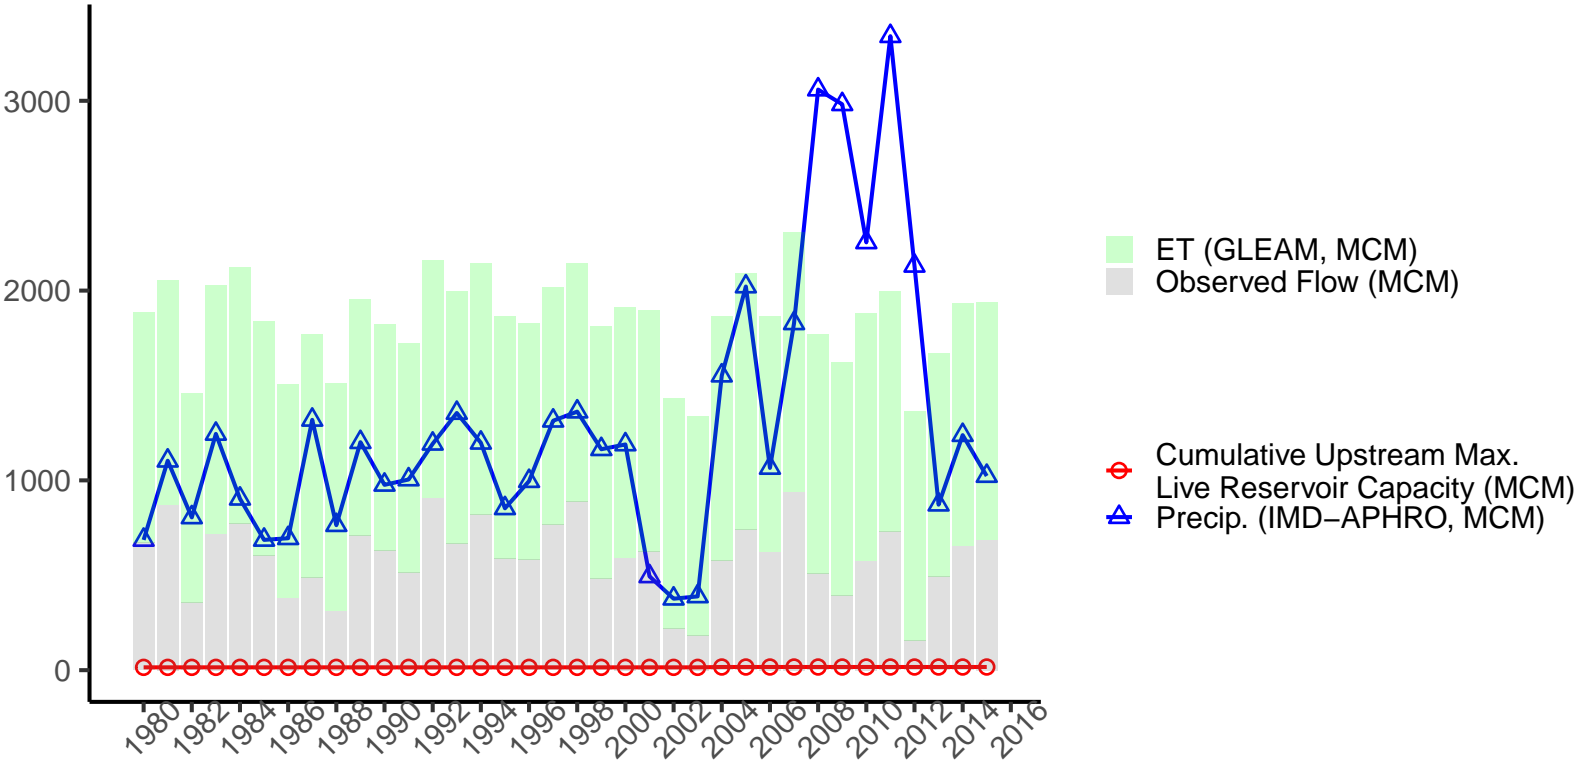

Station: Domohani, River: Brahmaputra/Teesta  
GHI ID: gbm\_x\_domoh, Catch. Area: 9648 sq. km

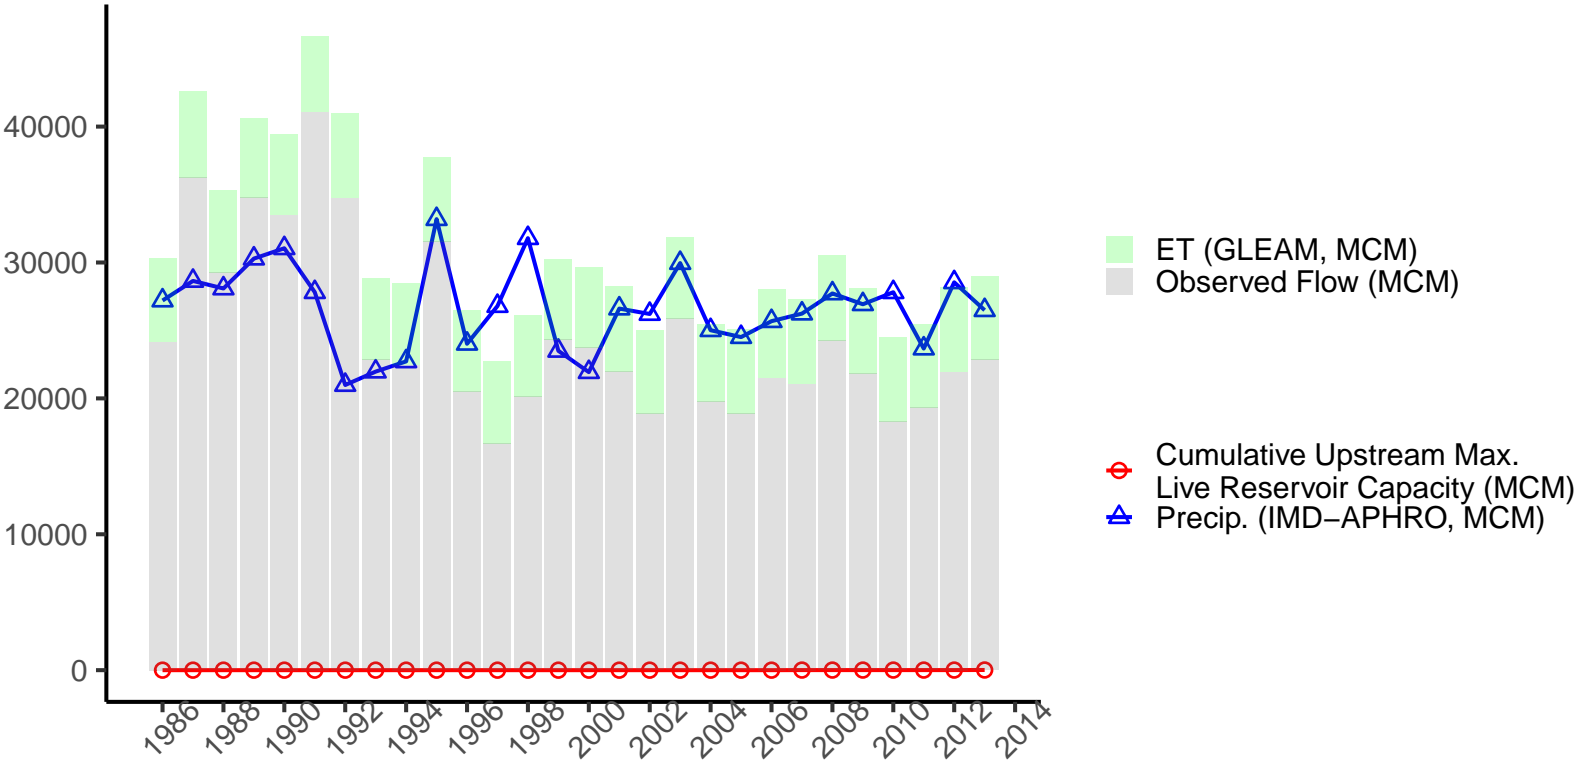

Station: Rishikesh, River: Ganga  
GHI ID: gbm\_x\_rishi, Catch. Area: 21897 sq. km

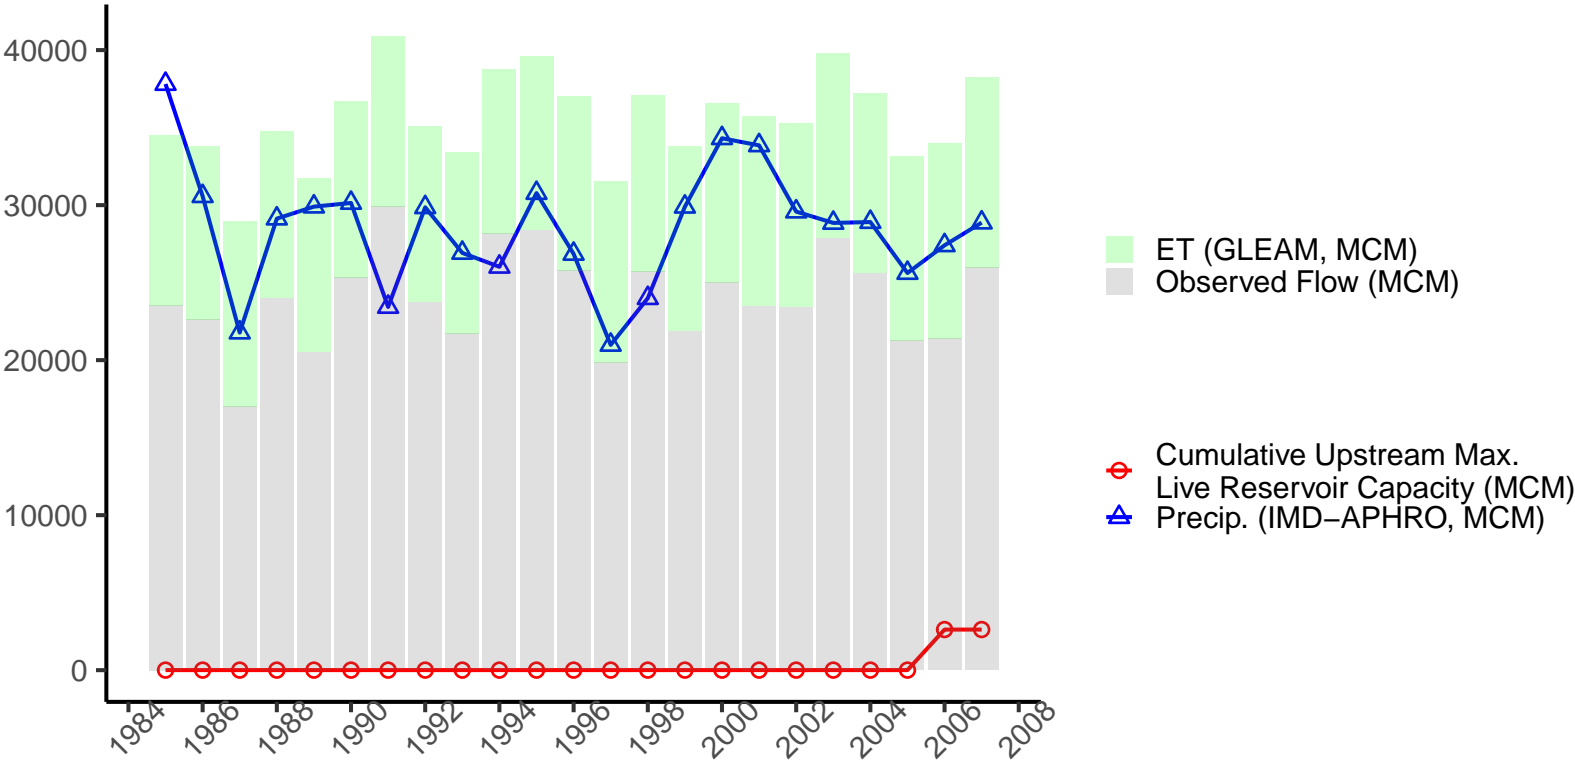

Station: Potteru (Seasonal), River: Godavari/Sabari/Potteru Vagu  
GHI ID: goda\_potte, Catch. Area: 1175 sq. km

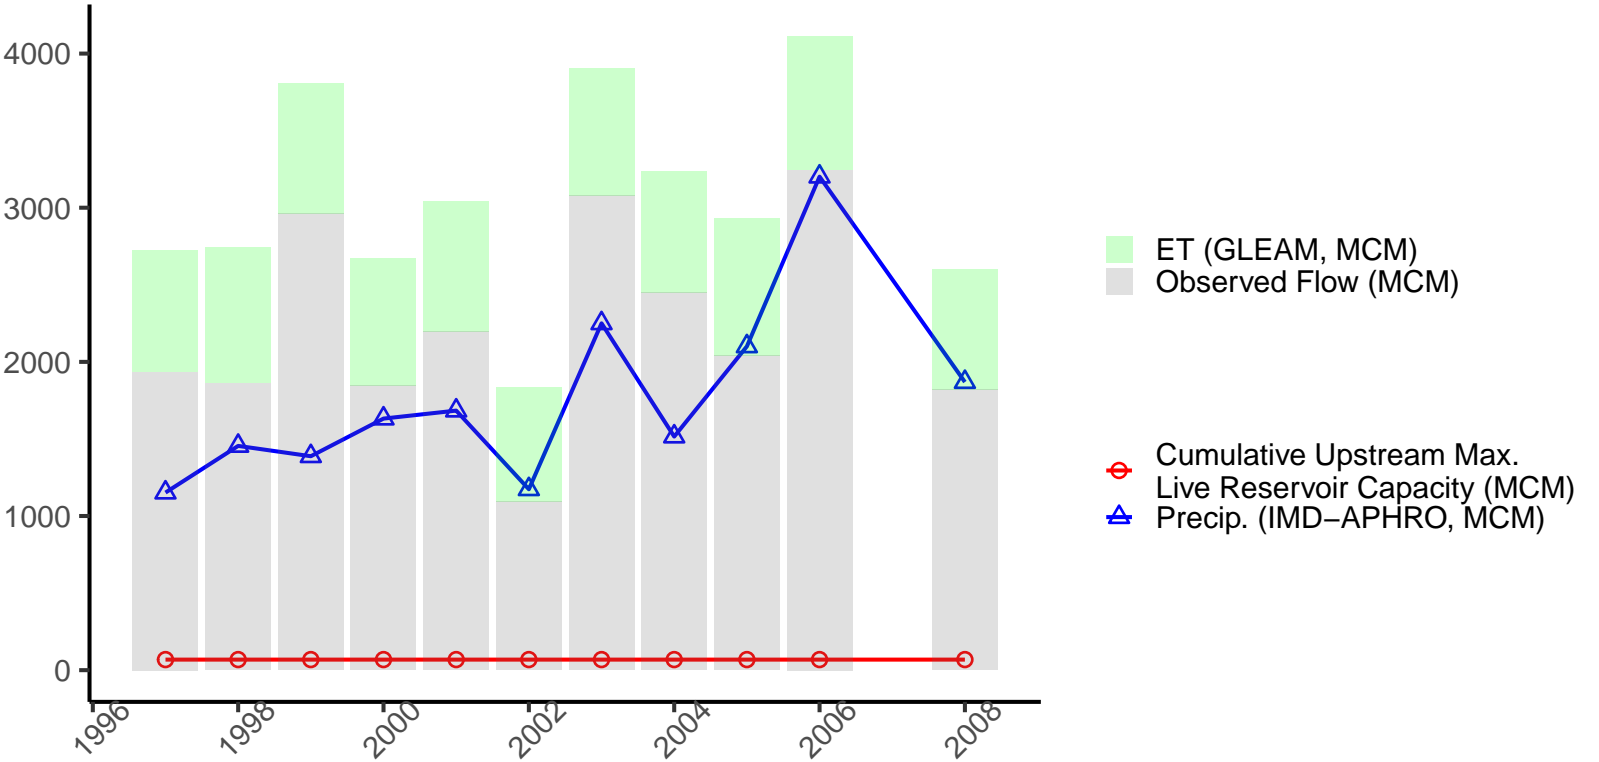

Station: Saradaput, River: Godavari/Sabari  
GHI ID: goda\_sarad, Catch. Area: 5098 sq. km

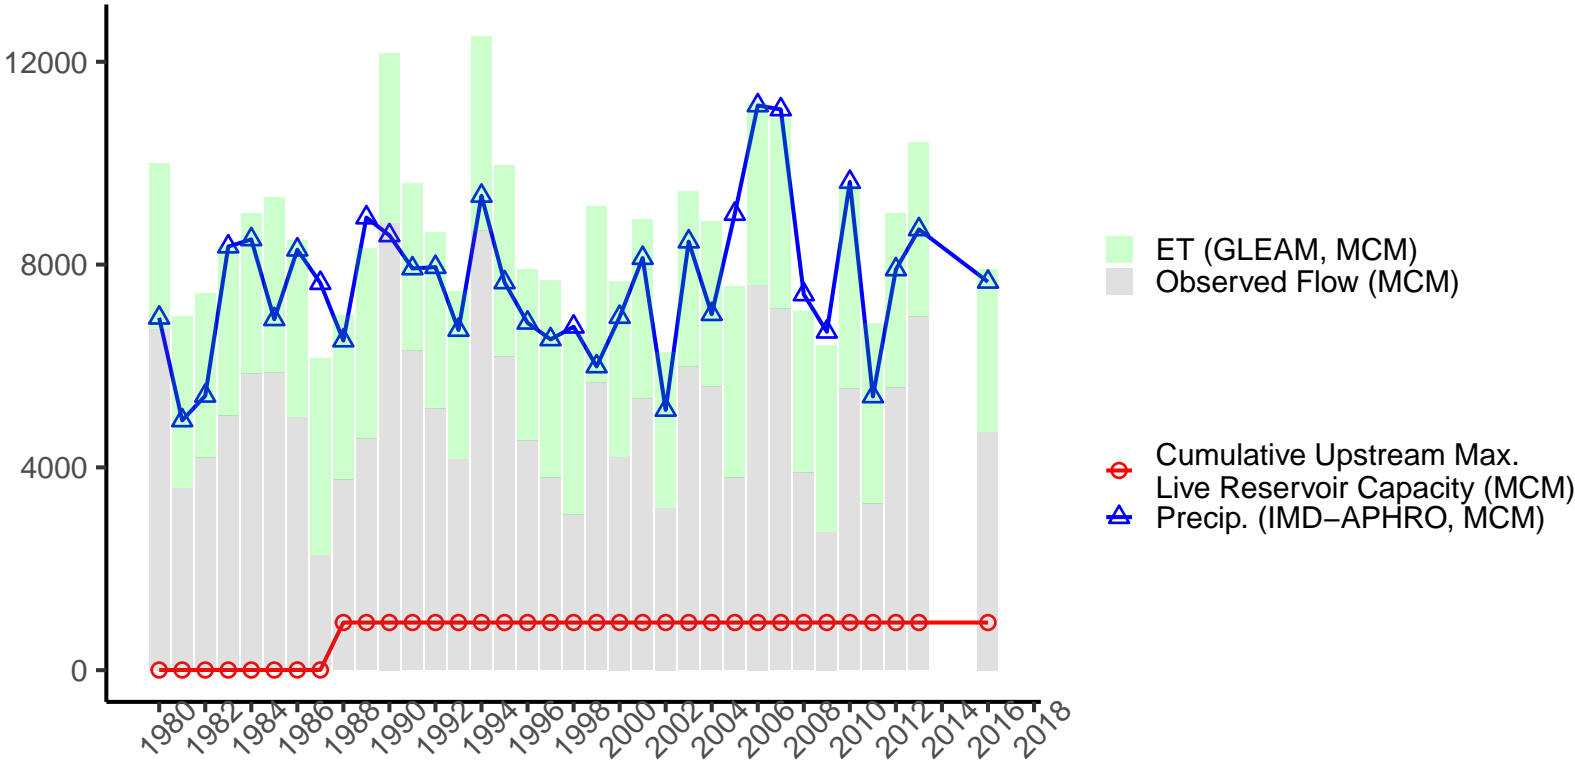



Station: Akhnoor, River: Chenab  
GHI ID: indu\_akhno, Catch. Area: 22691 sq. km

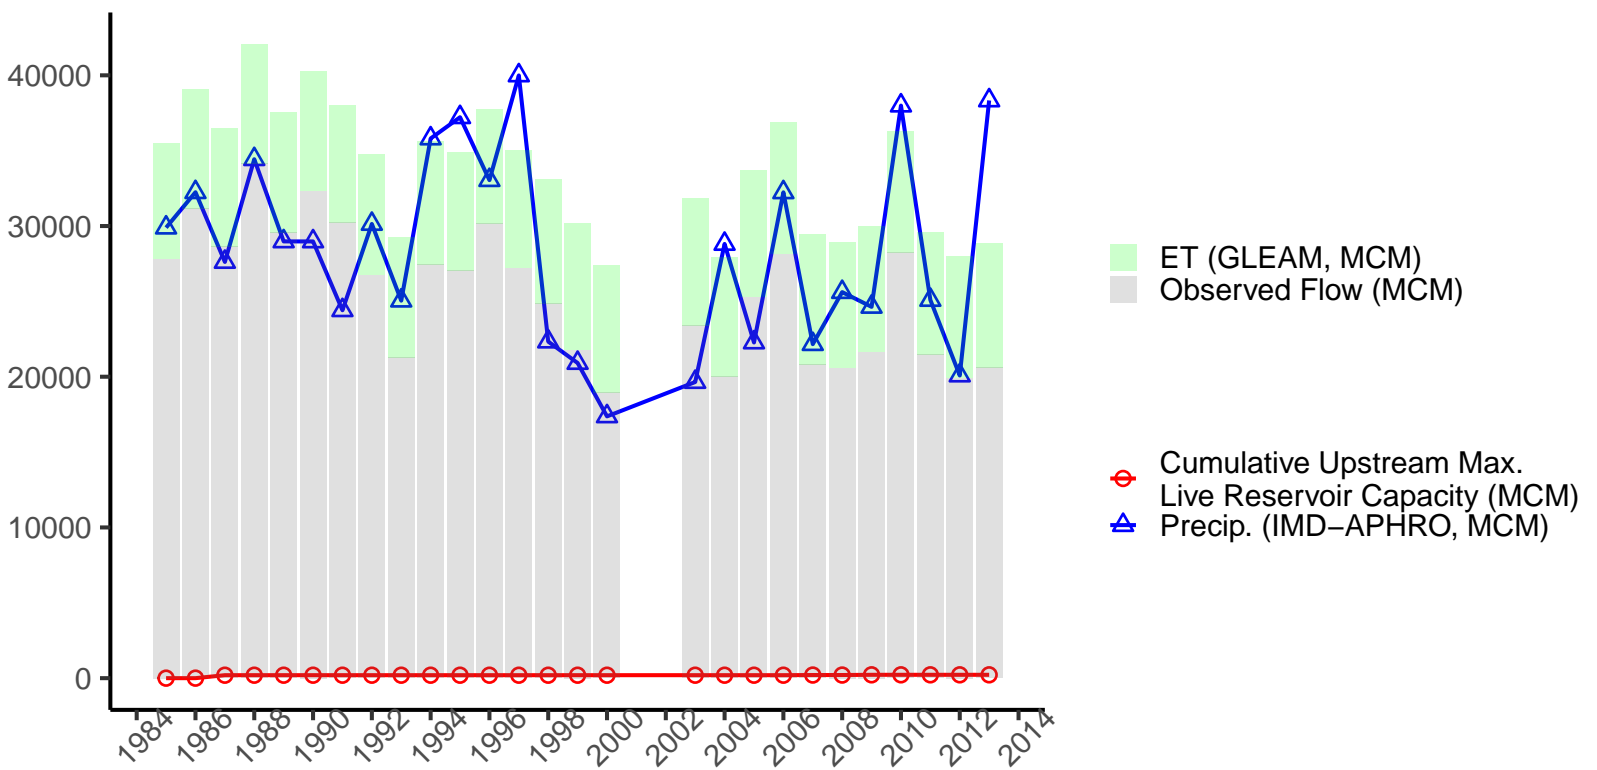

Station: Arjunwad (Seasonal), River: Krishna  
GHI ID: kris\_arjun, Catch. Area: 12280 sq. km

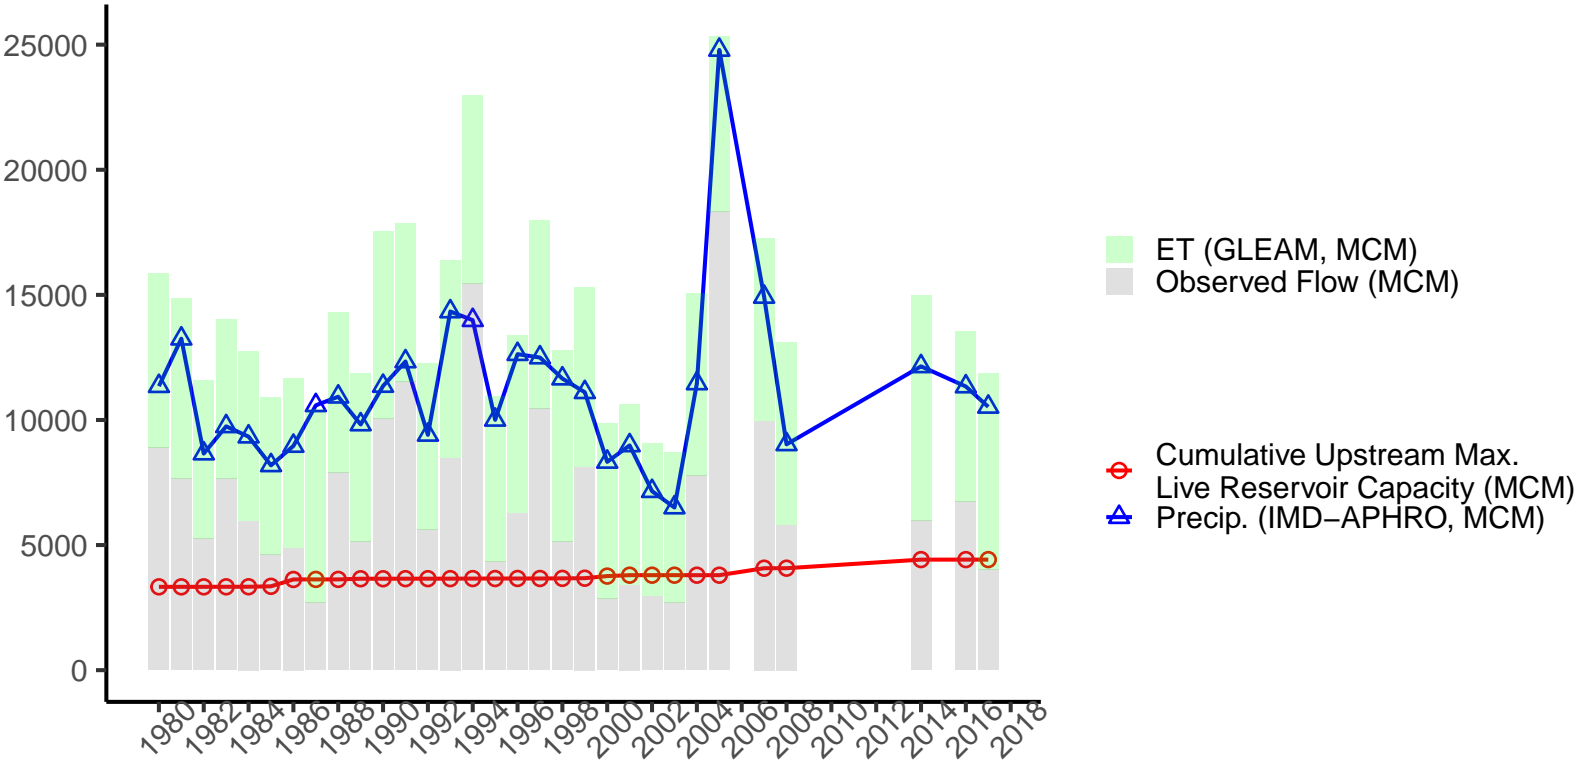

Station: Karad, River: Krishna  
GHI ID: kris\_karad, Catch. Area: 5432 sq. km

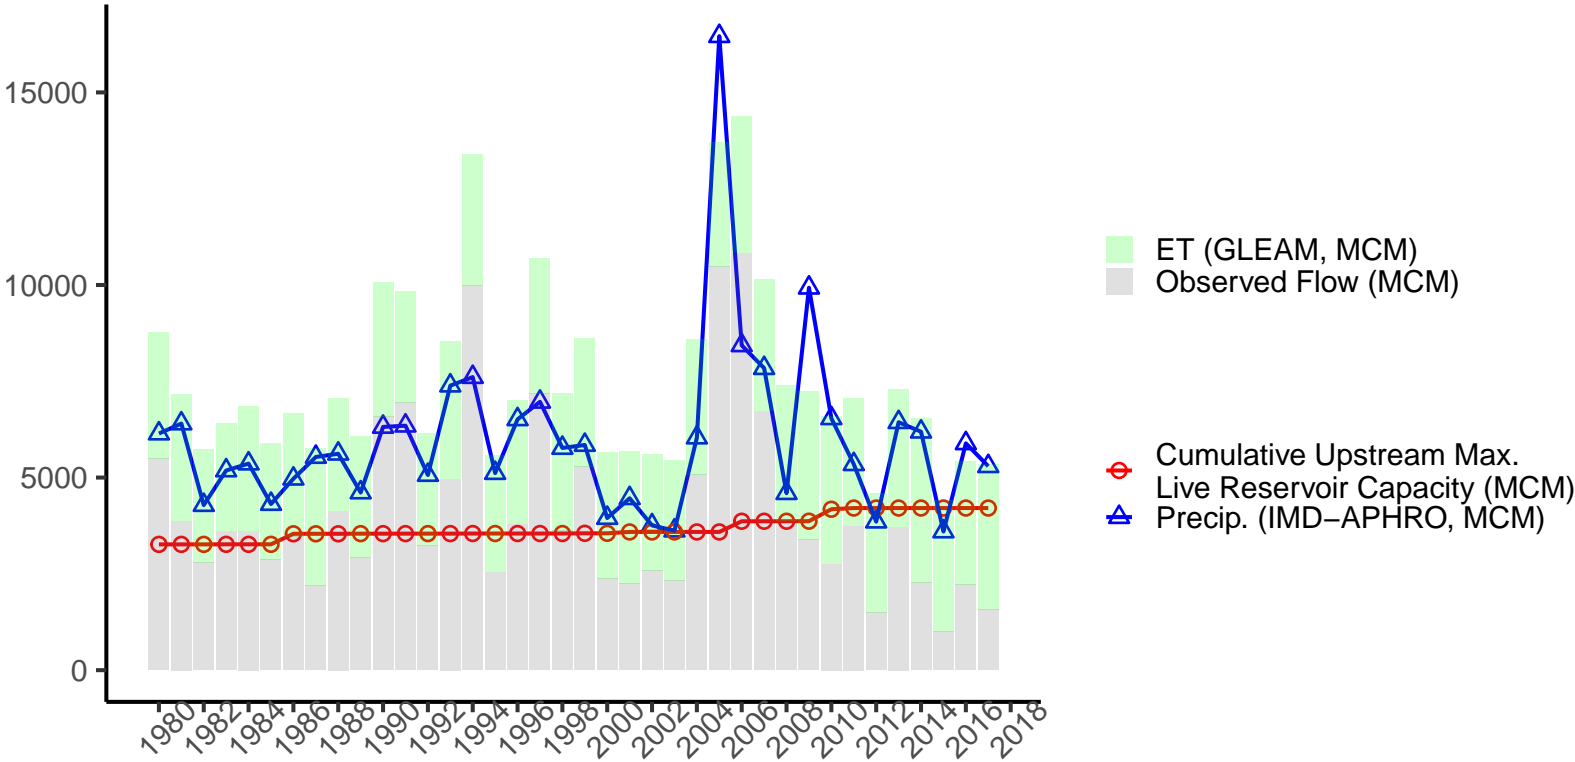

Station: Kurundwad, River: Krishna  
GHI ID: kris\_kurun, Catch. Area: 15265 sq. km

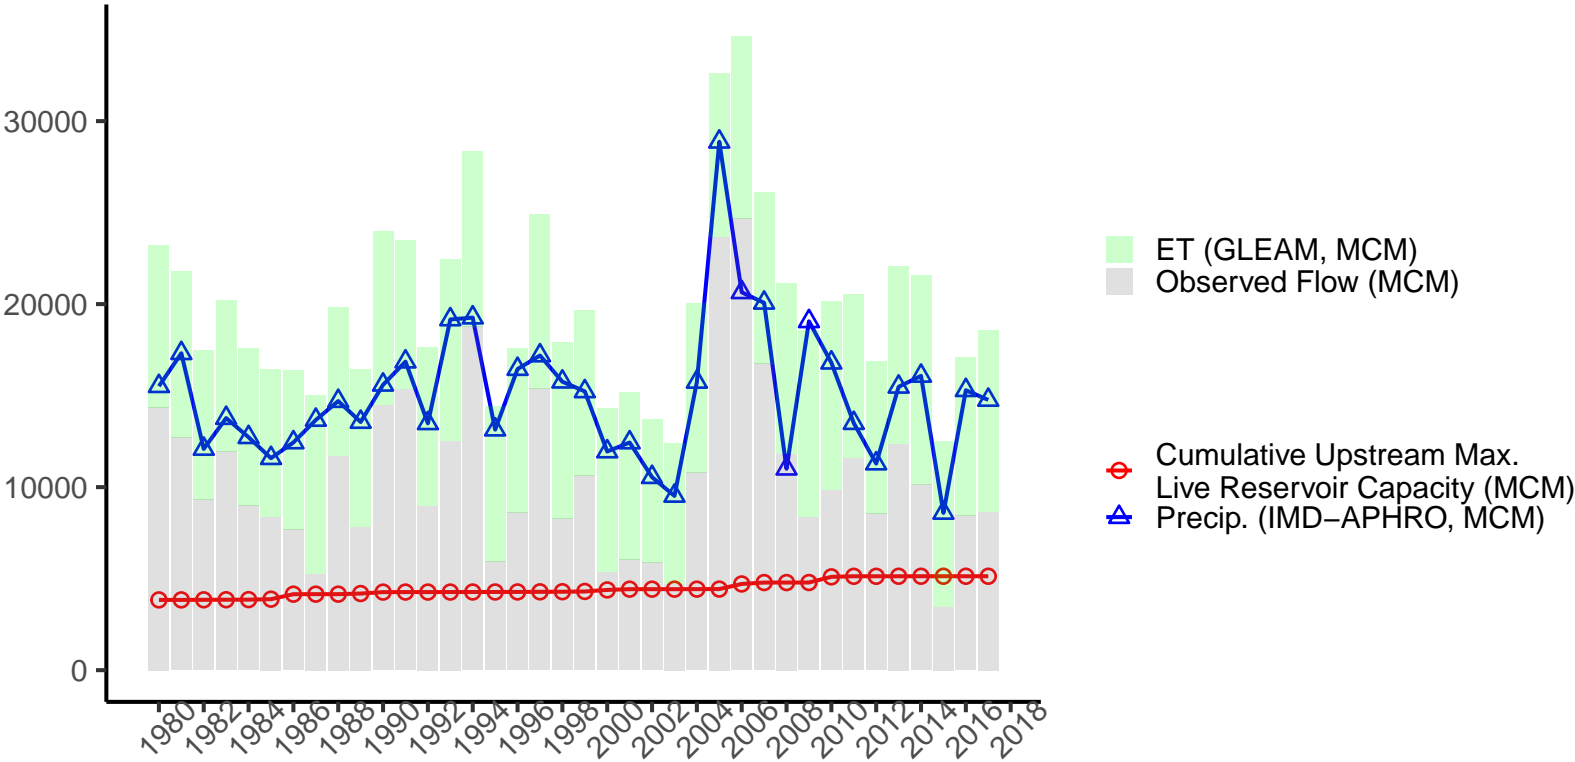

Station: Phulgaon (Seasonal), River: Krishna/Bhima  
GHI ID: kris\_phulg, Catch. Area: 2142 sq. km

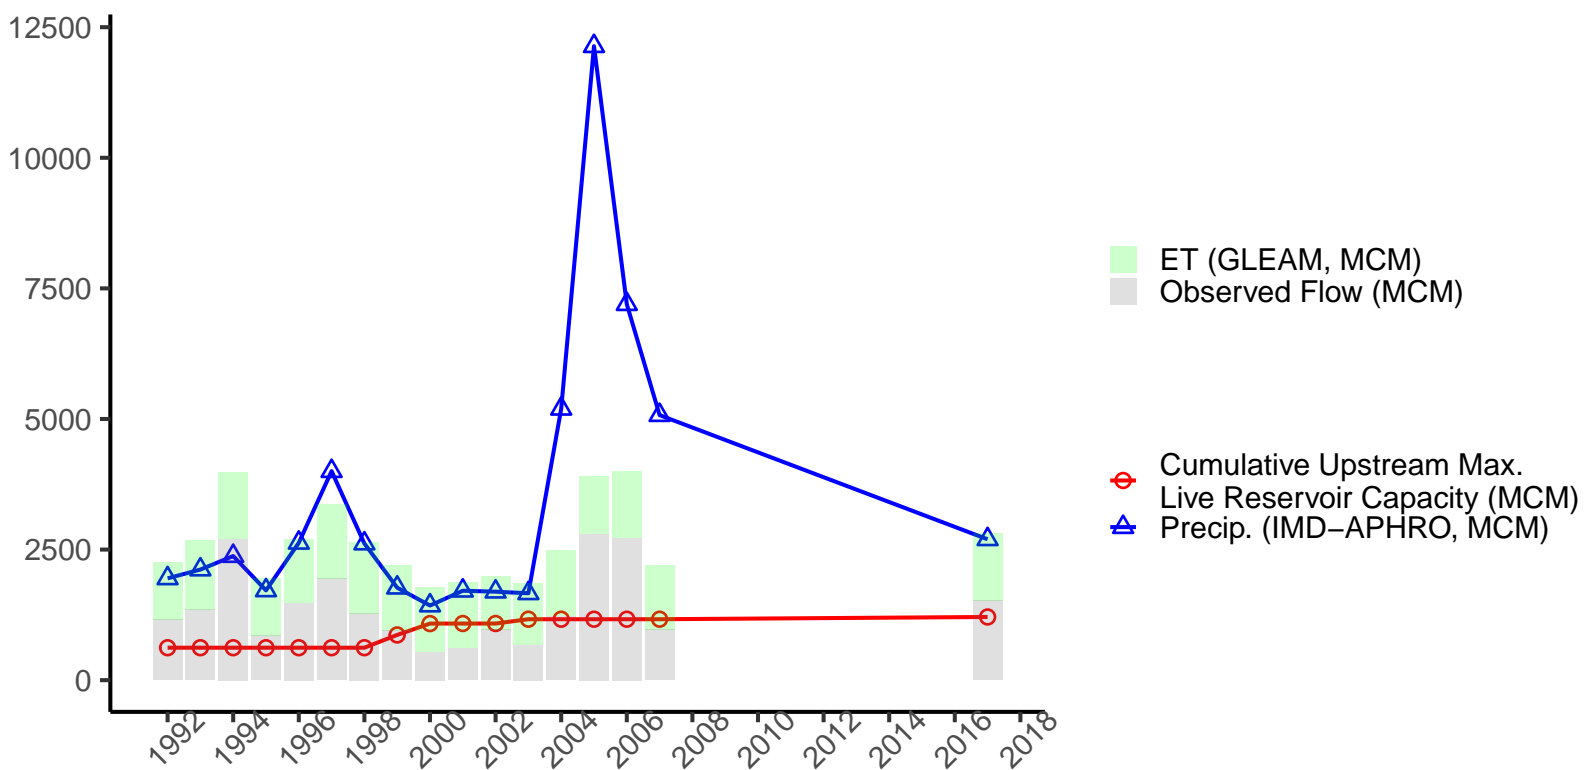

Station: Sadalga (Seasonal), River: Krishna/Dudhganga  
GHI ID: kris\_sadal, Catch. Area: 2285 sq. km

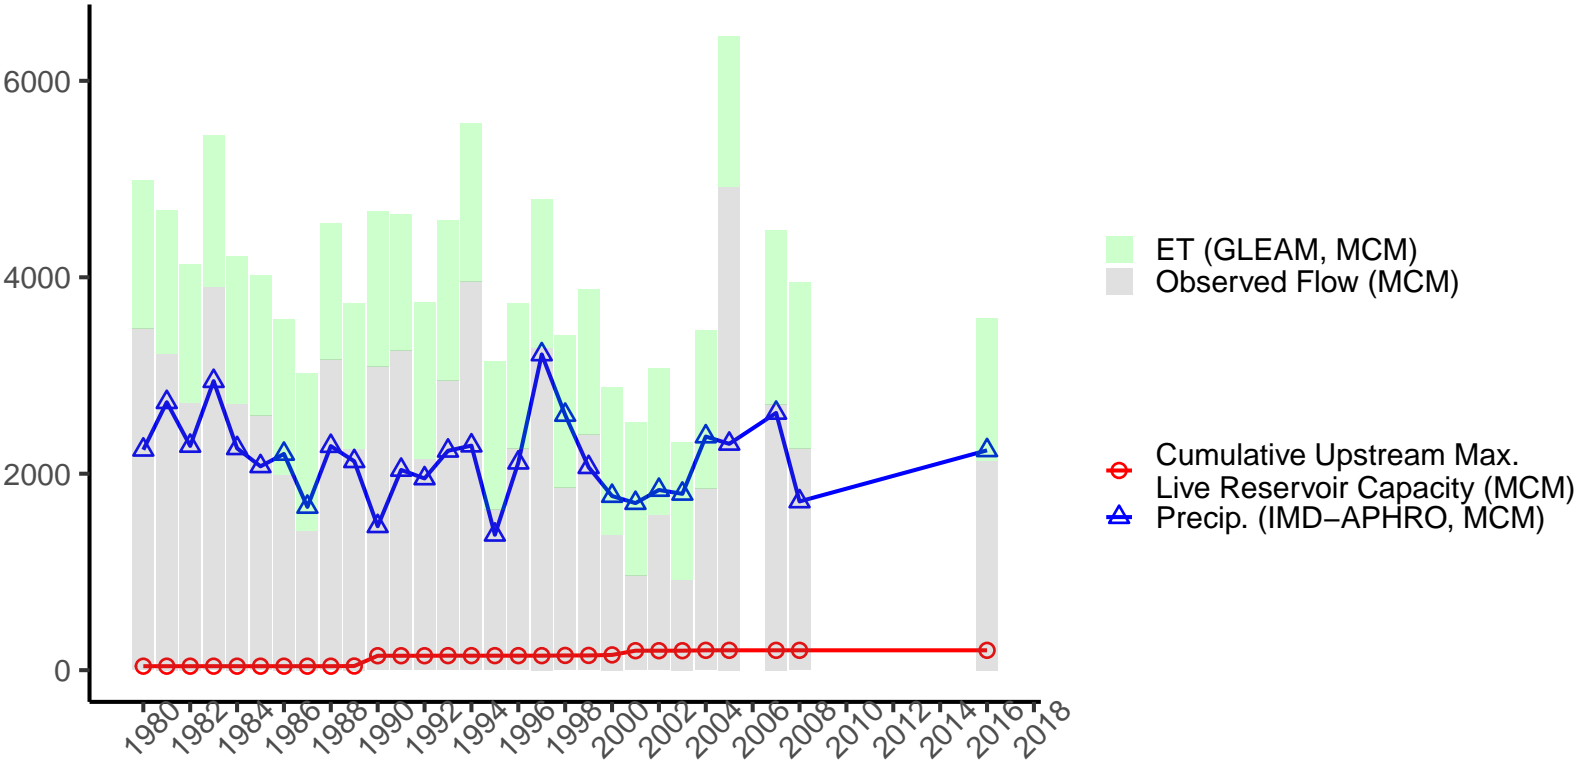

Station: Samdoli (Seasonal), River: Krishna/Varna  
GHI ID: kris\_samdo, Catch. Area: 2010 sq. km

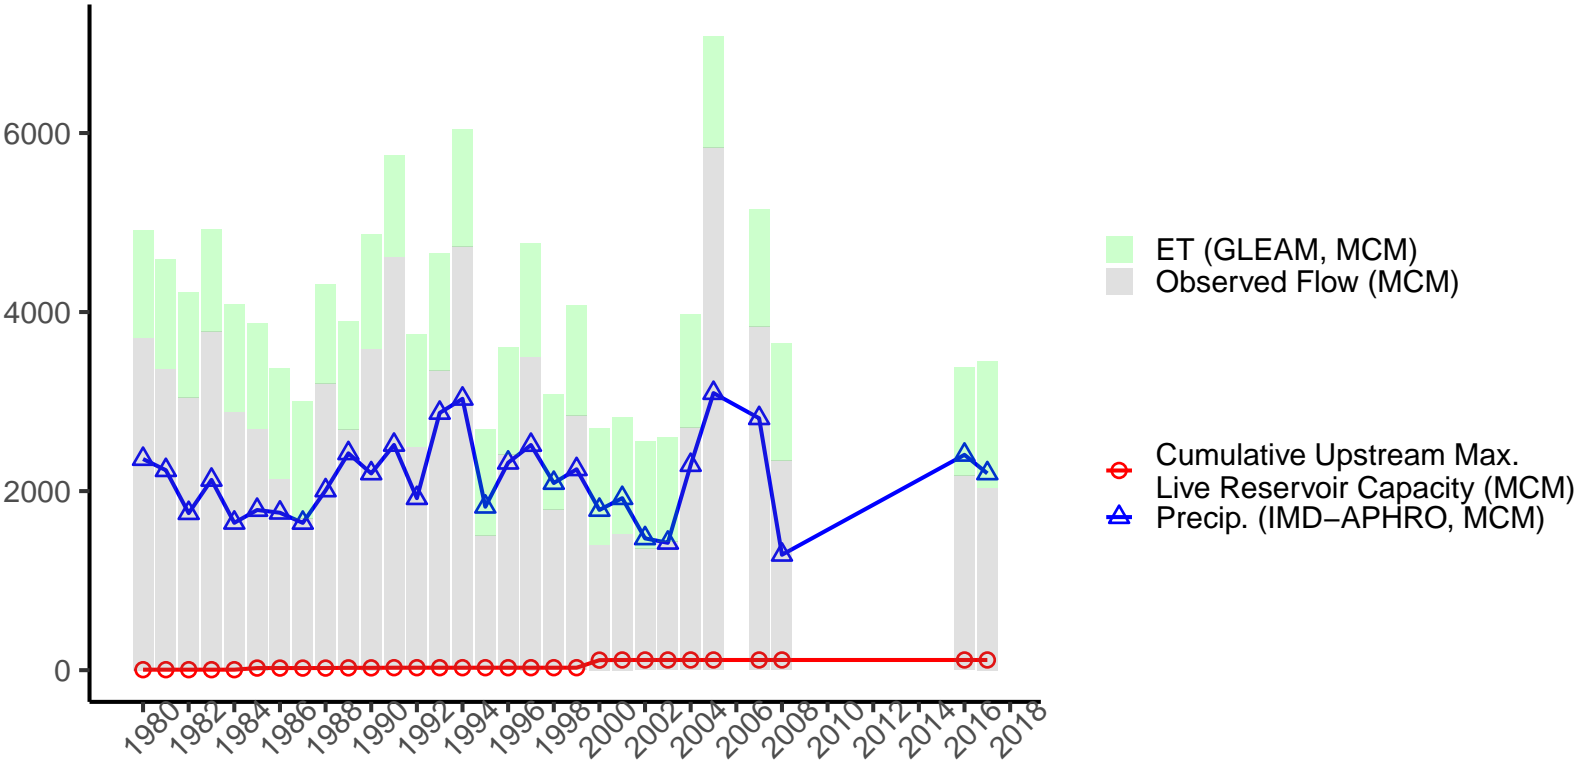

Station: Shimoga, River: Tungabhadra/Tunga  
GHI ID: kris\_shimo, Catch. Area: 2761 sq. km

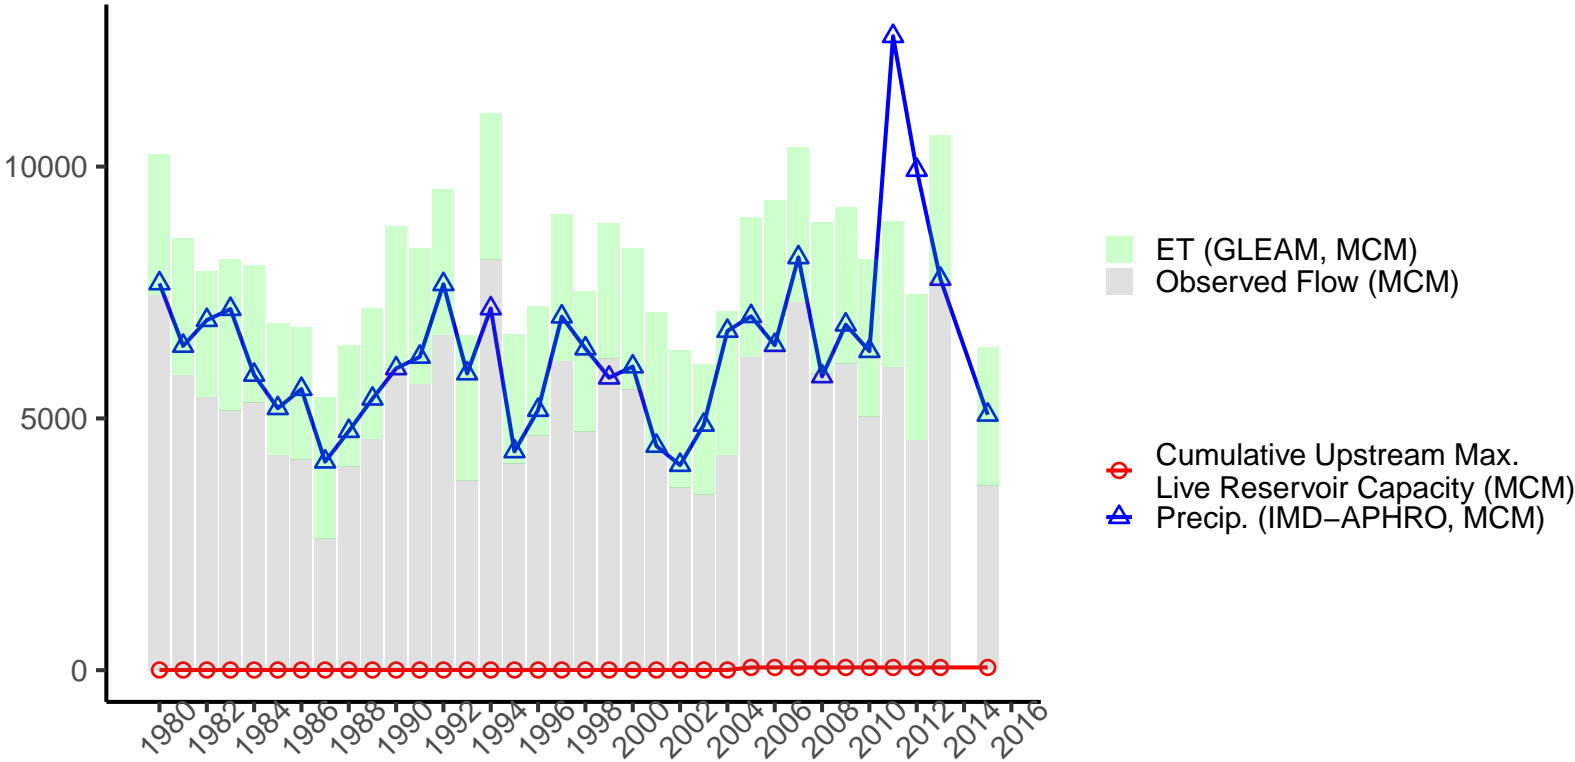



Station: Terwad (Seasonal), River: Krishna/Panchganga  
GHI ID: kris\_terwa, Catch. Area: 2444 sq. km

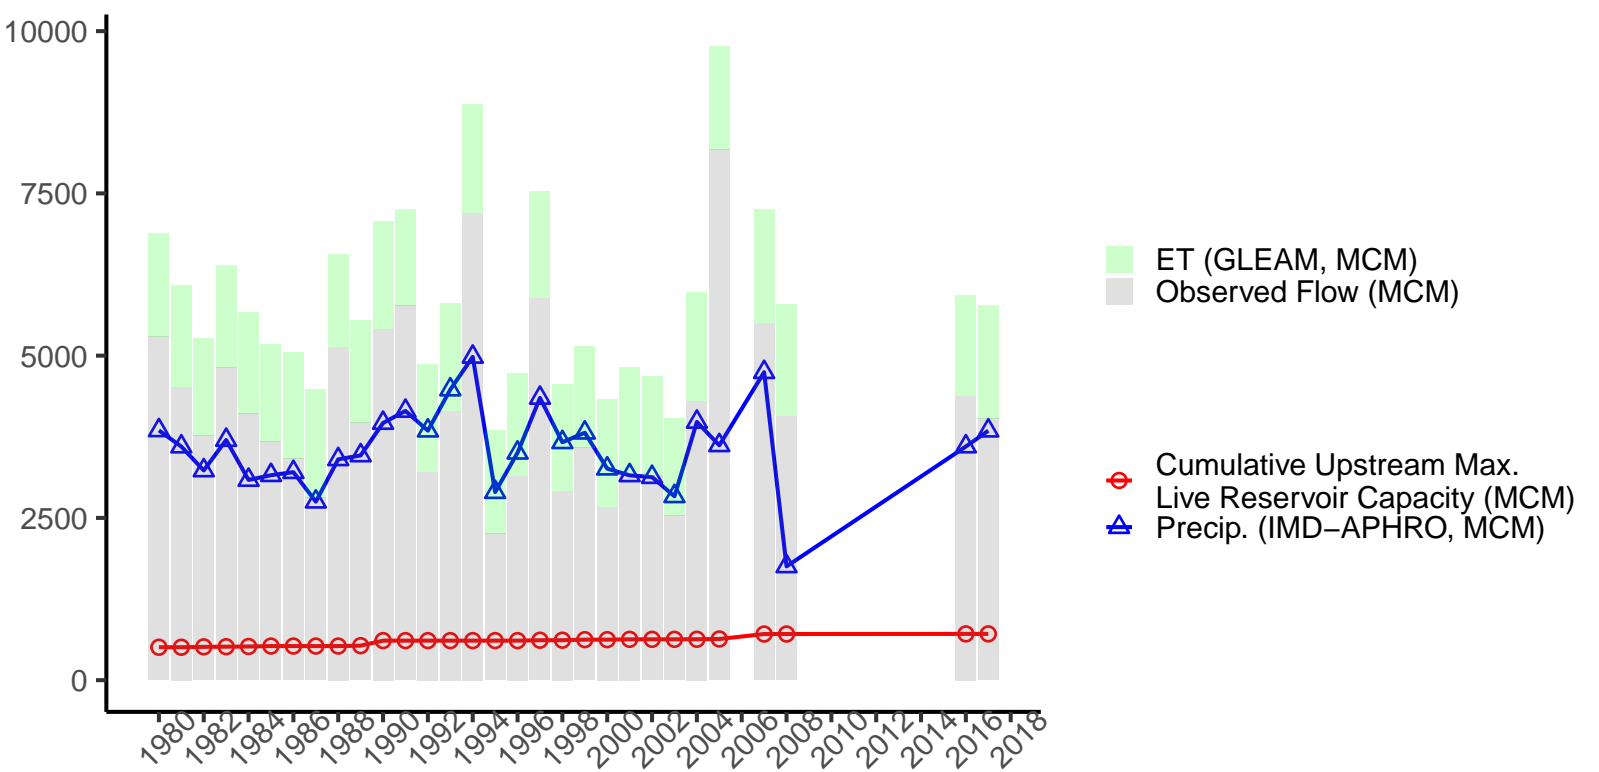

Station: Warunjli, River: Krishna/Koyna  
GHI ID: kris\_warun, Catch. Area: 1909 sq. km

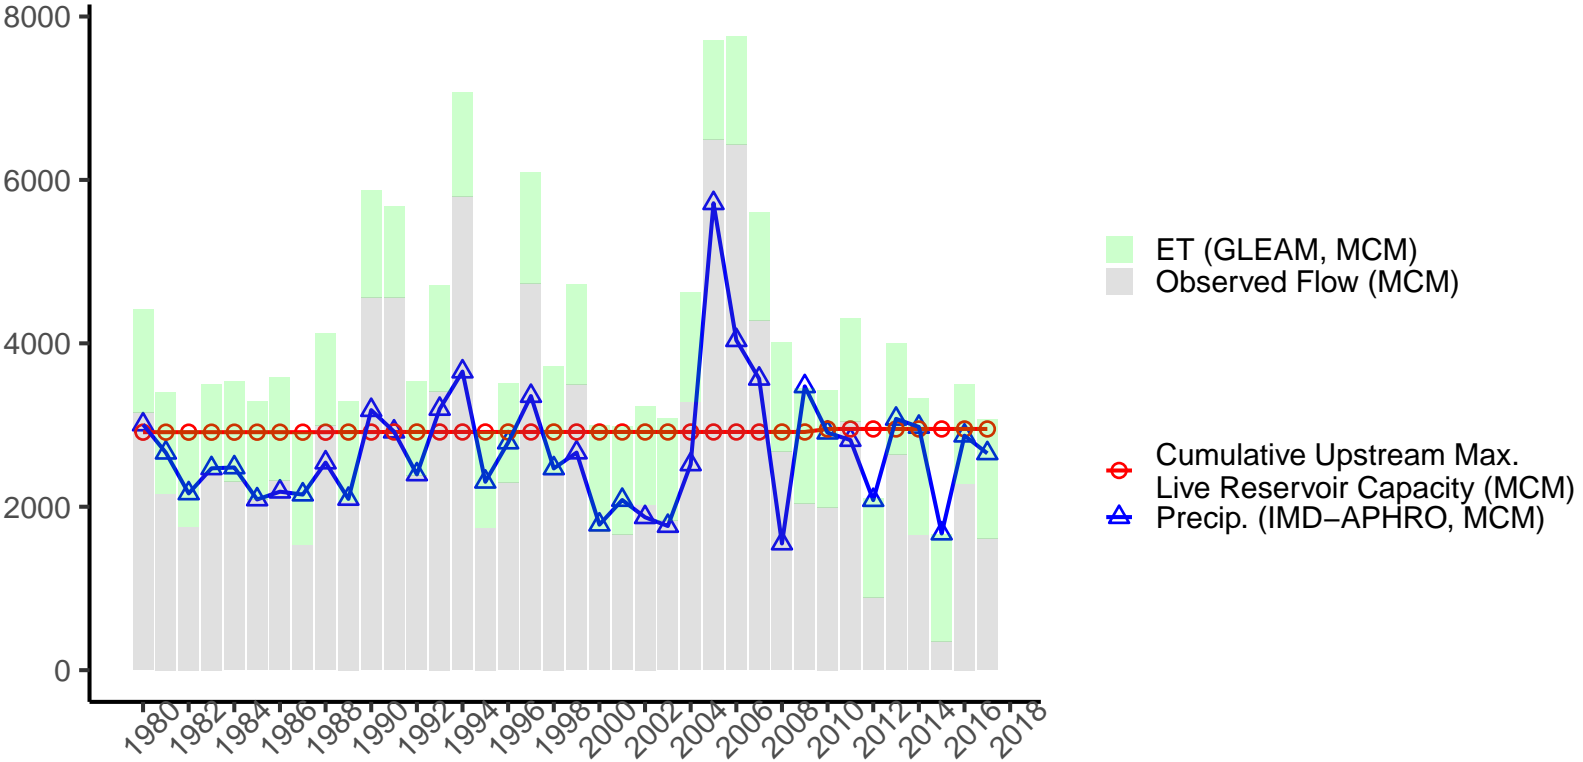

Station: Chakaliya, River: Mahi/Anas  
GHI ID: mahi\_chaka, Catch. Area: 3608 sq. km

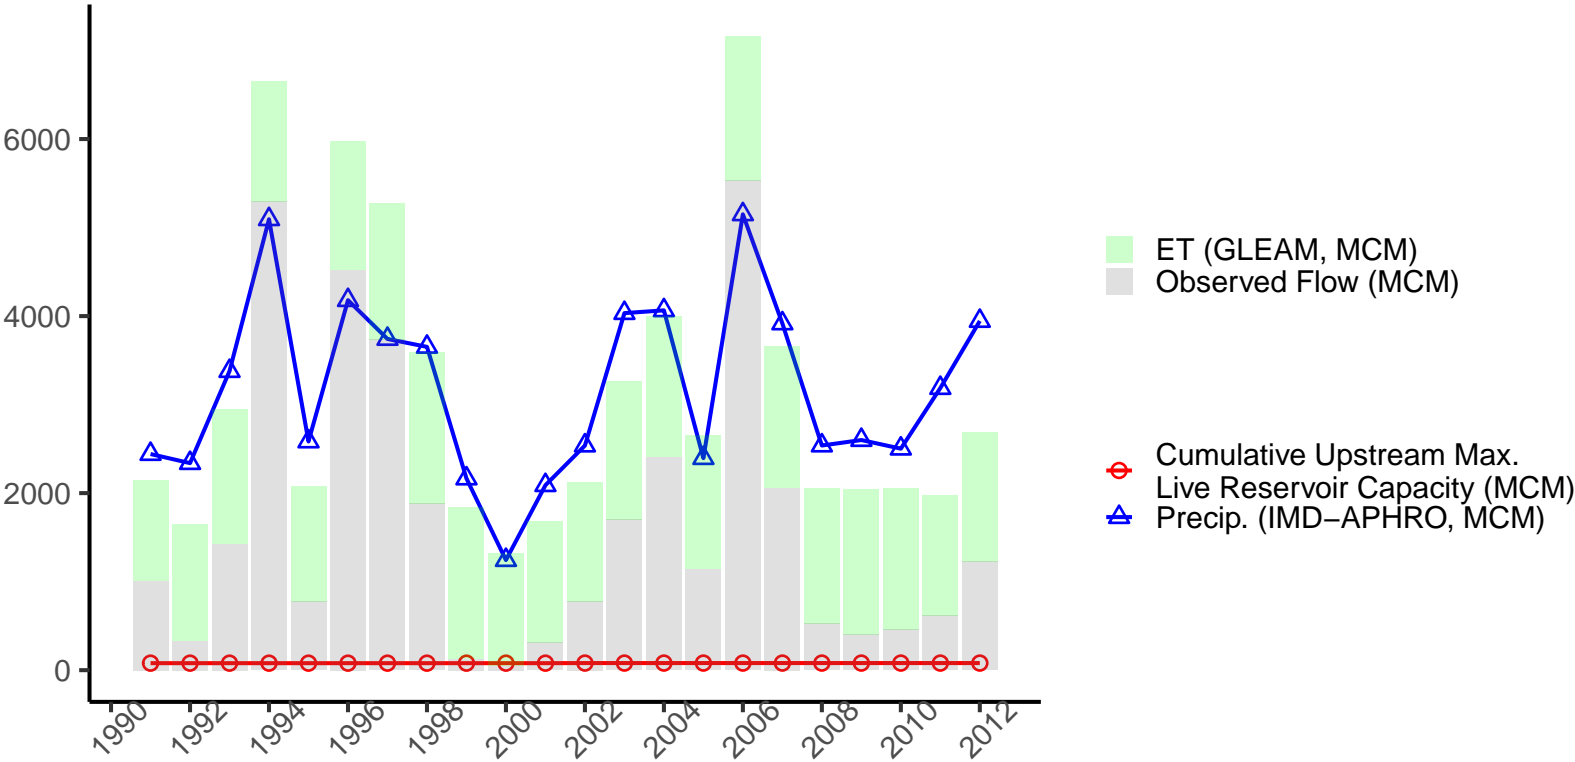

Station: Gadarwara, River: Narmada/Sakkar  
GHI ID: narm\_gadar, Catch. Area: 2232 sq. km

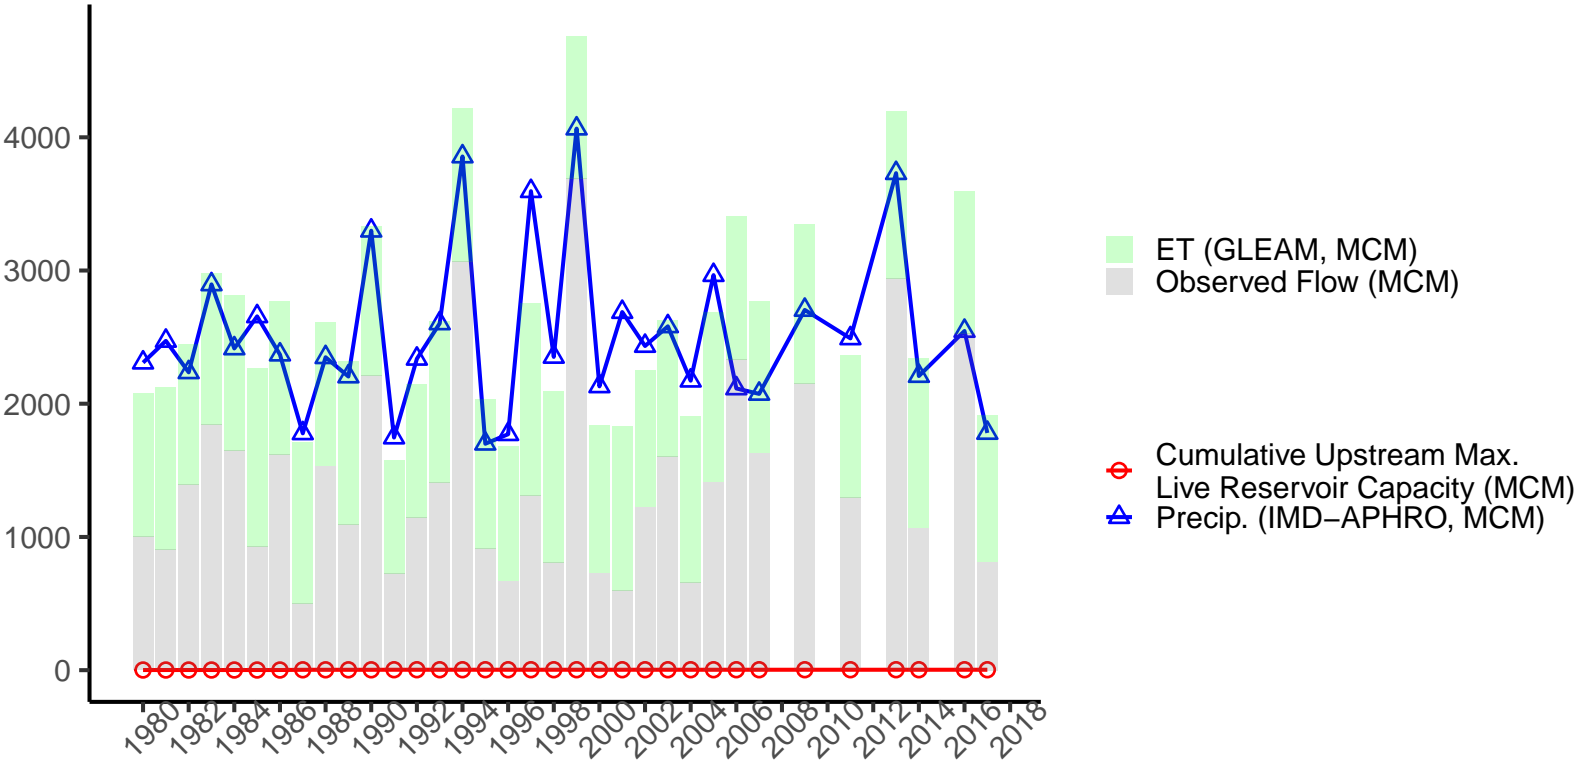

Station: Govindapur, River: Burhabalang  
GHI ID: sube\_govin, Catch. Area: 4450 sq. km

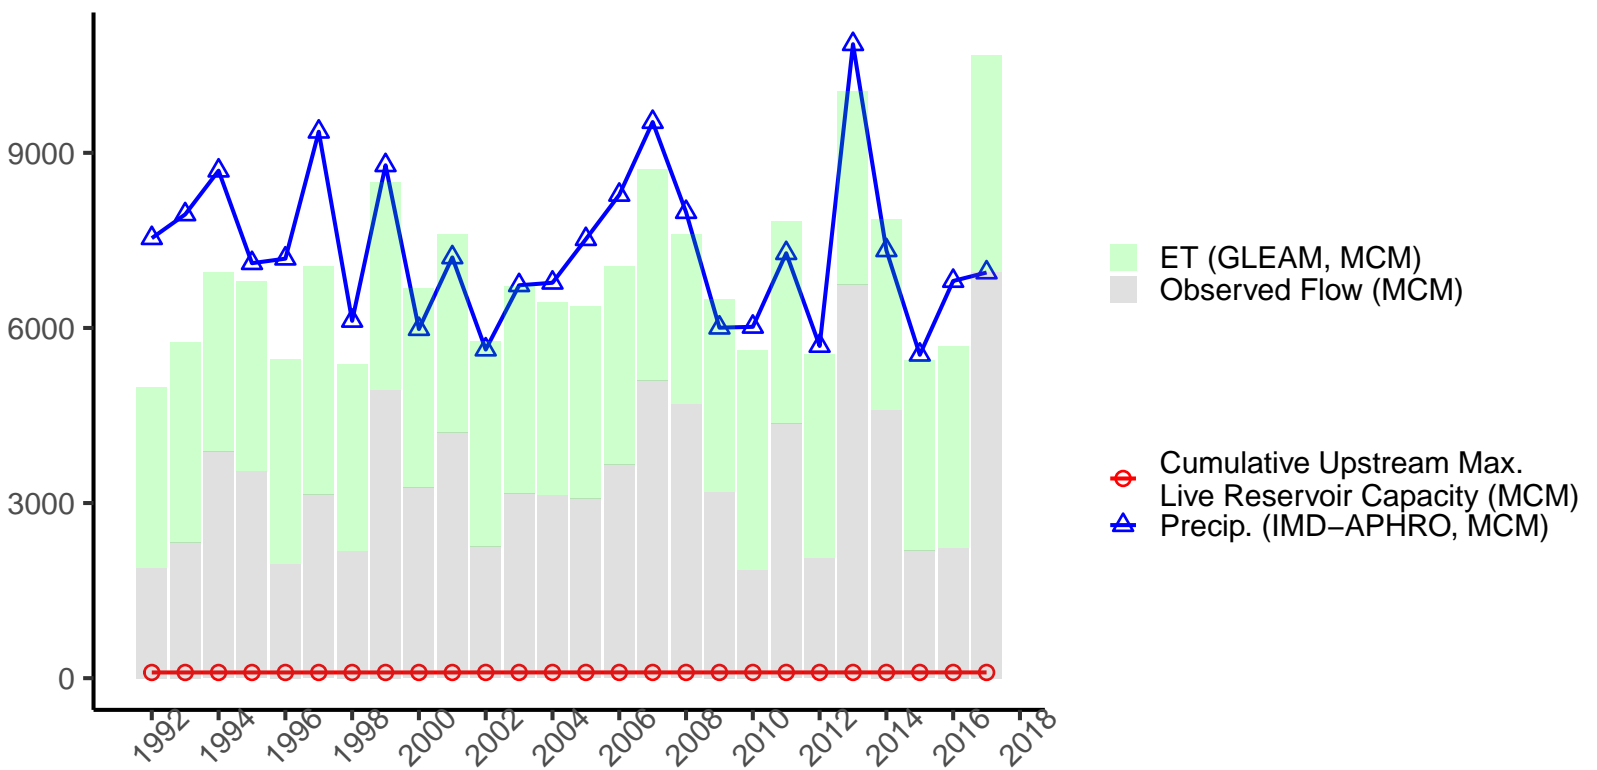

Station: Mahuwa, River: Purna  
GHI ID: wfrn\_mahuw, Catch. Area: 1750 sq. km

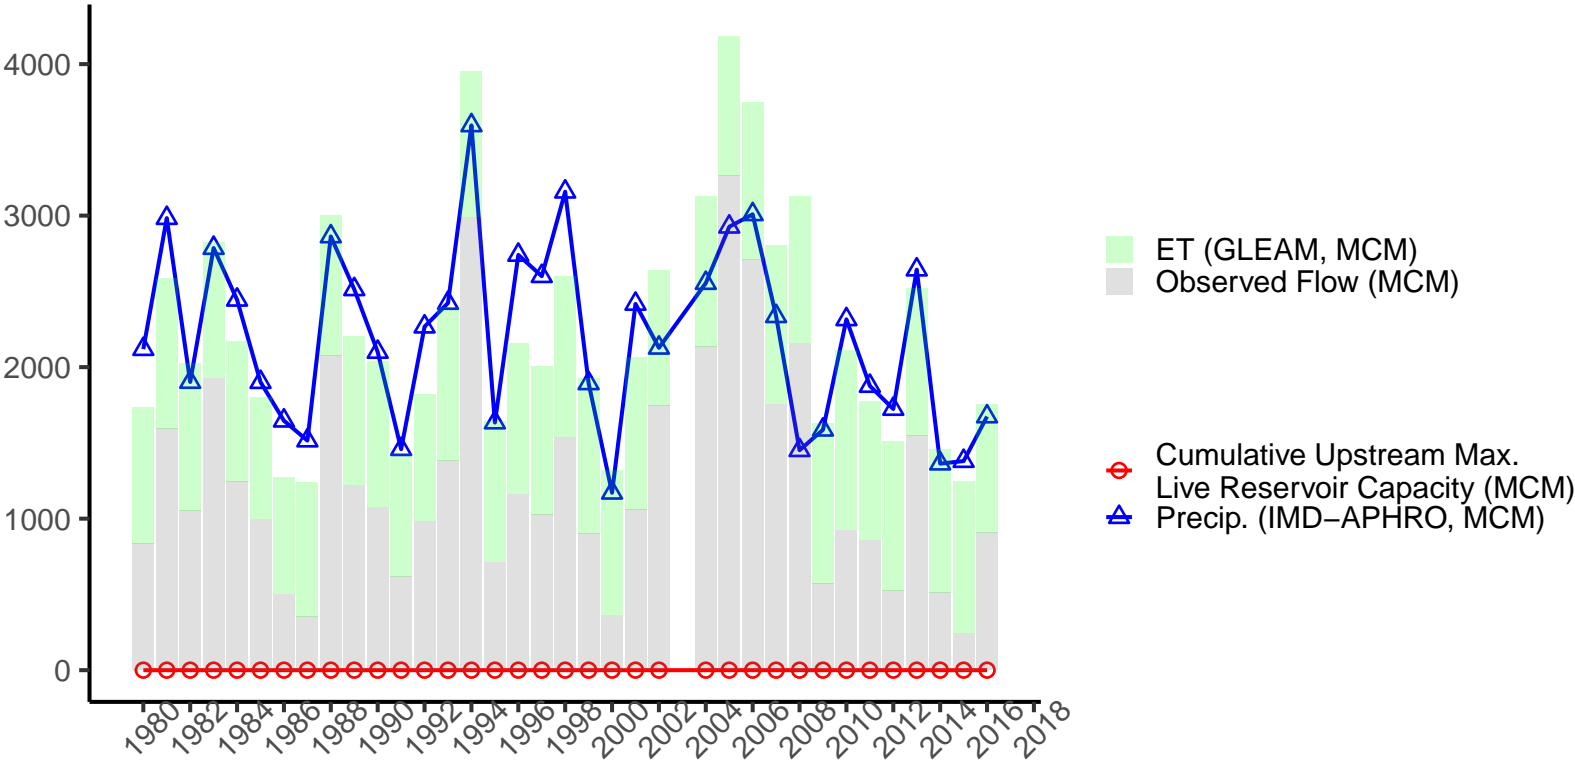

Station: Ozerkheda, River: Wagh/Damanganga  
GHI ID: wfrn\_ozerk, Catch. Area: 678 sq. km

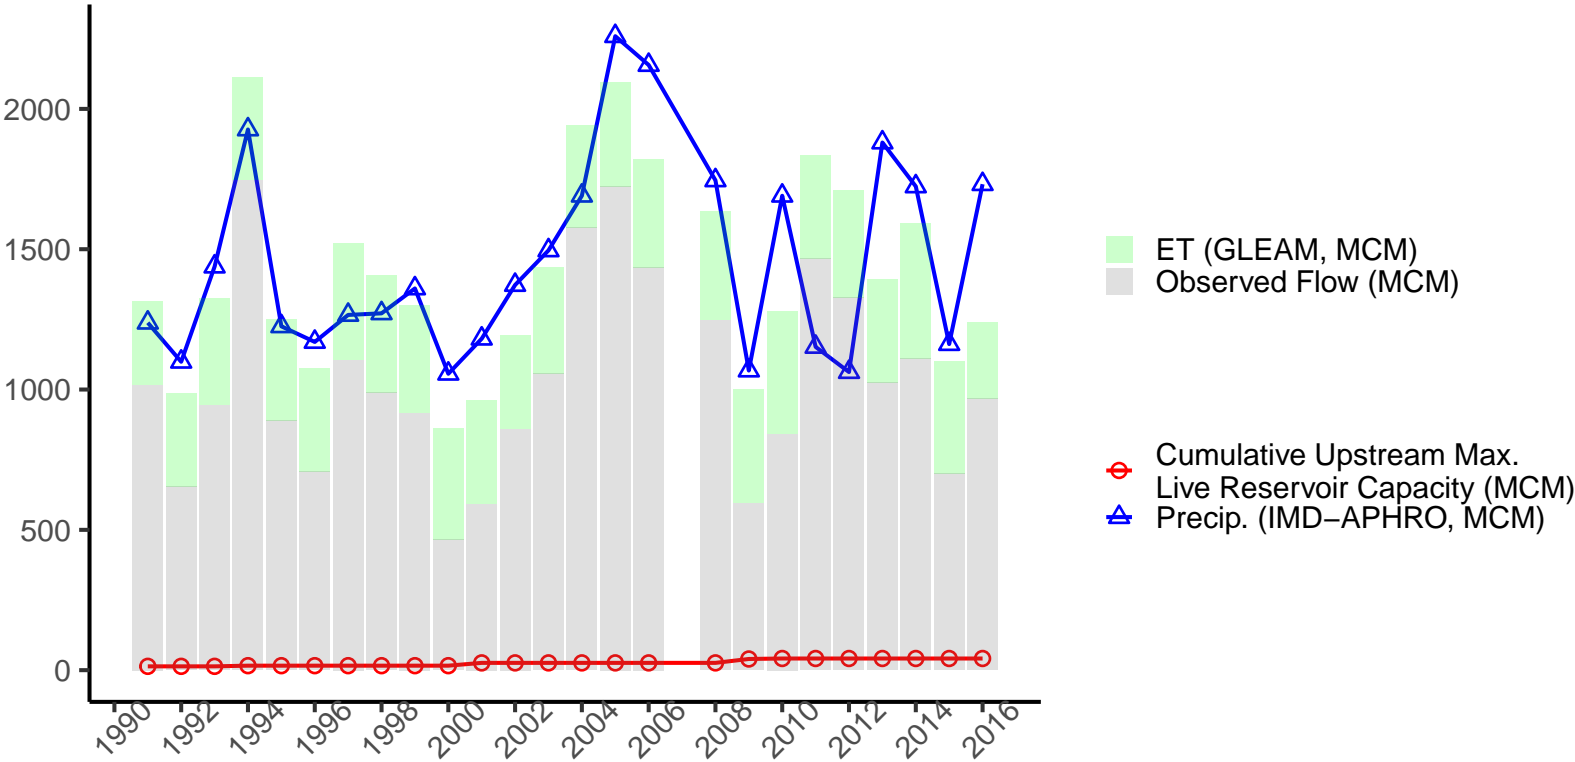

Station: Ambarampalayam, River: Bharathapuzha/Kannadipuzha/Aliyar  
GHI ID: wfrs\_ambar, Catch. Area: 950 sq. km

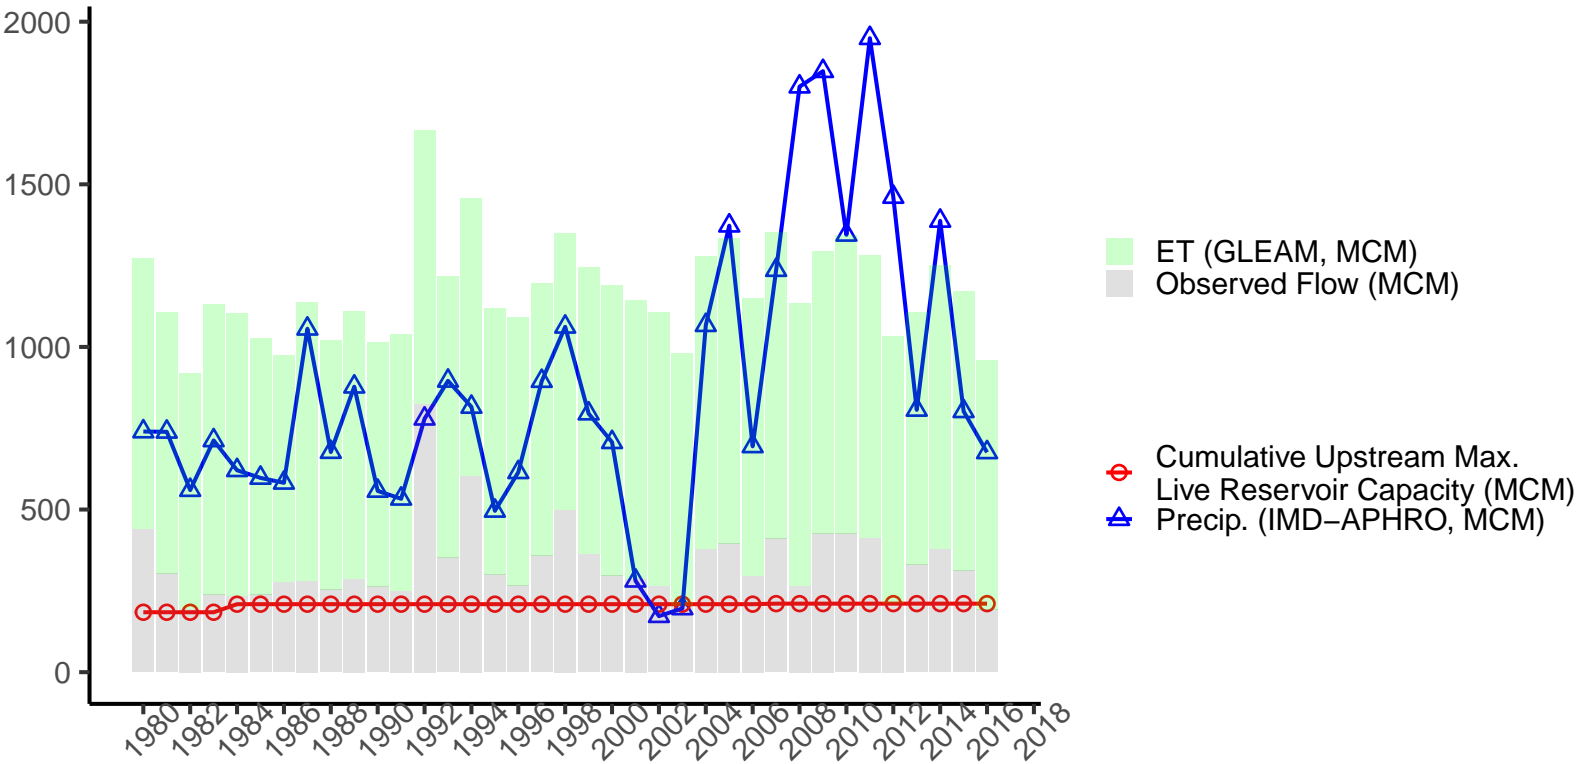



Station: Arangaly, River: Periyar/Chalaky  
GHI ID: wfrs\_arang, Catch. Area: 1342 sq. km

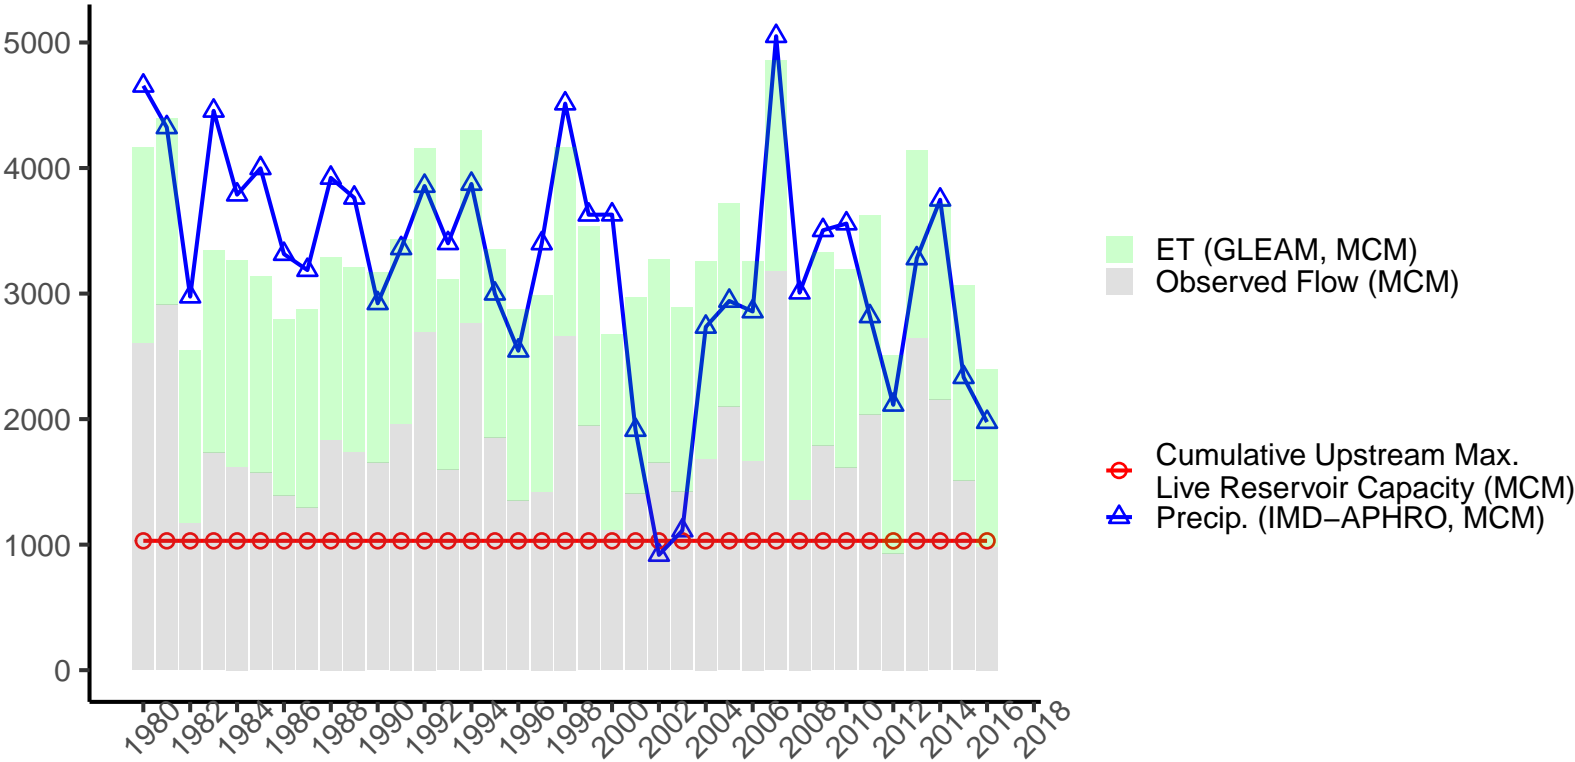

Station: Avershe, River: Seetha  
GHI ID: wfrrs\_avers, Catch. Area: 300 sq. km

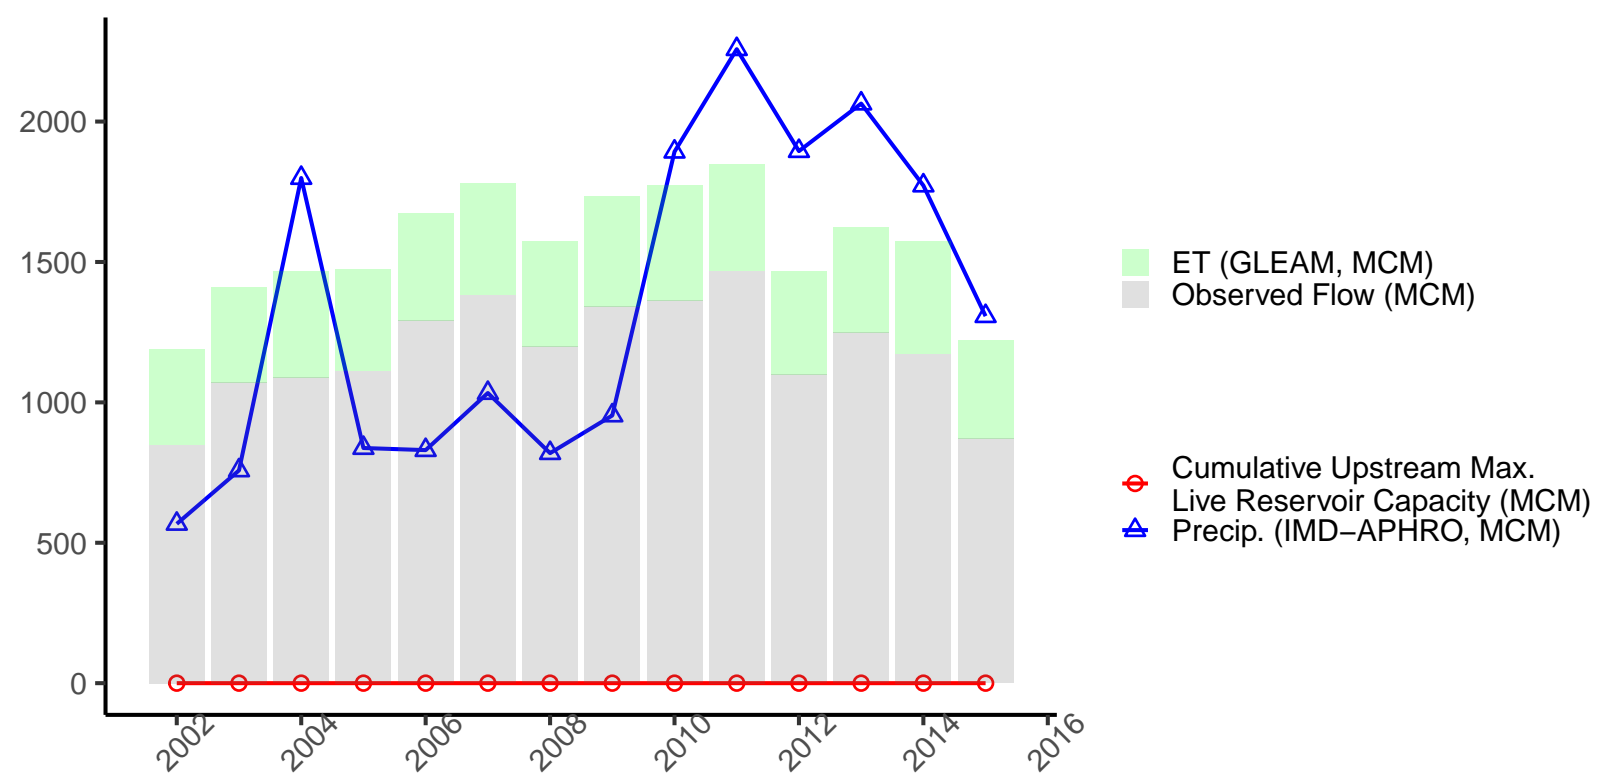

Station: Ayilam, River: Vamanapuram  
GHI ID: wfrs\_ayila, Catch. Area: 556 sq. km

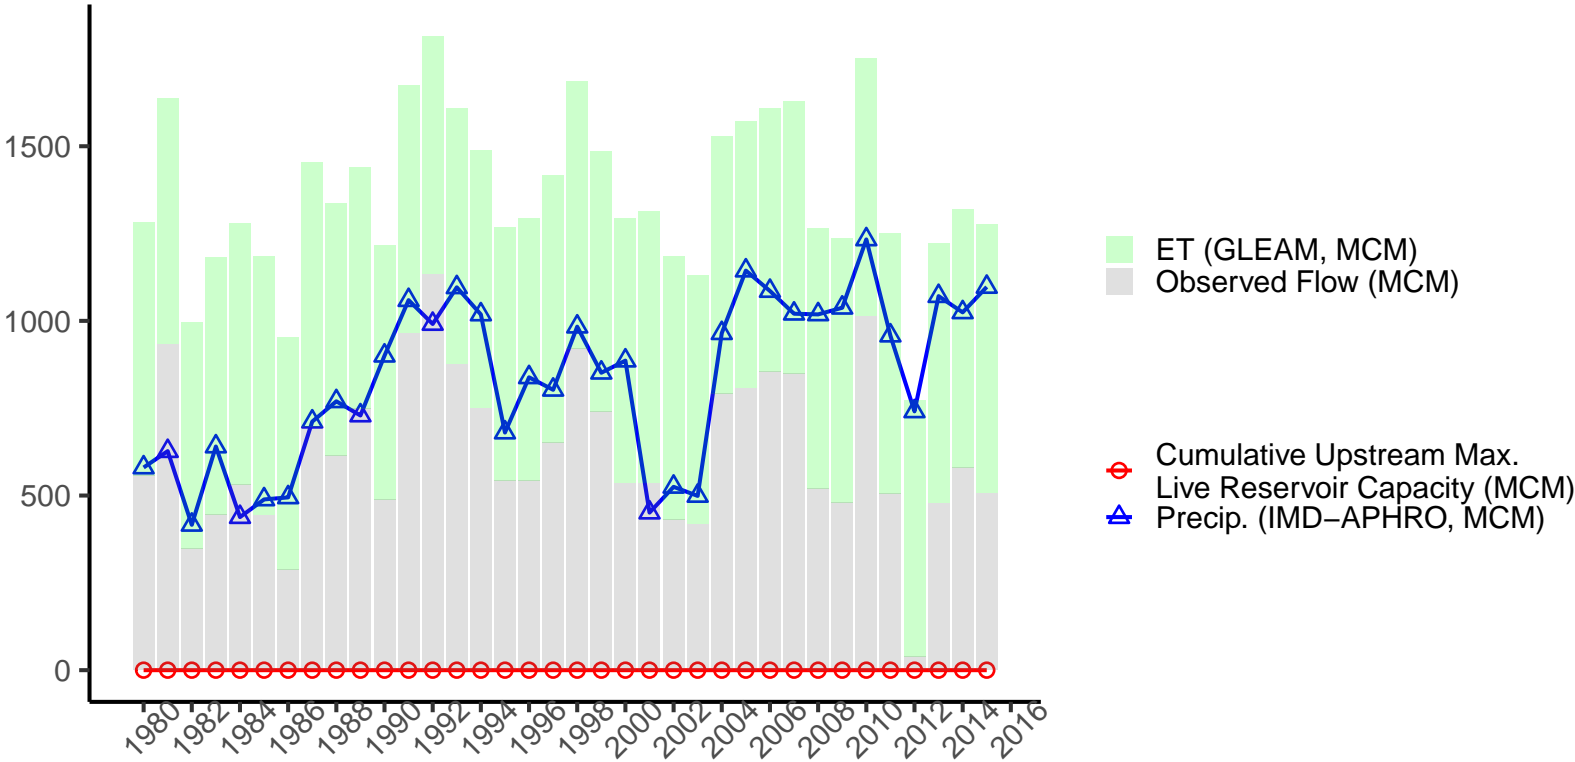

Station: Bantwal, River: Nethravathi  
GHI ID: wfrrs\_bantw, Catch. Area: 3295 sq. km

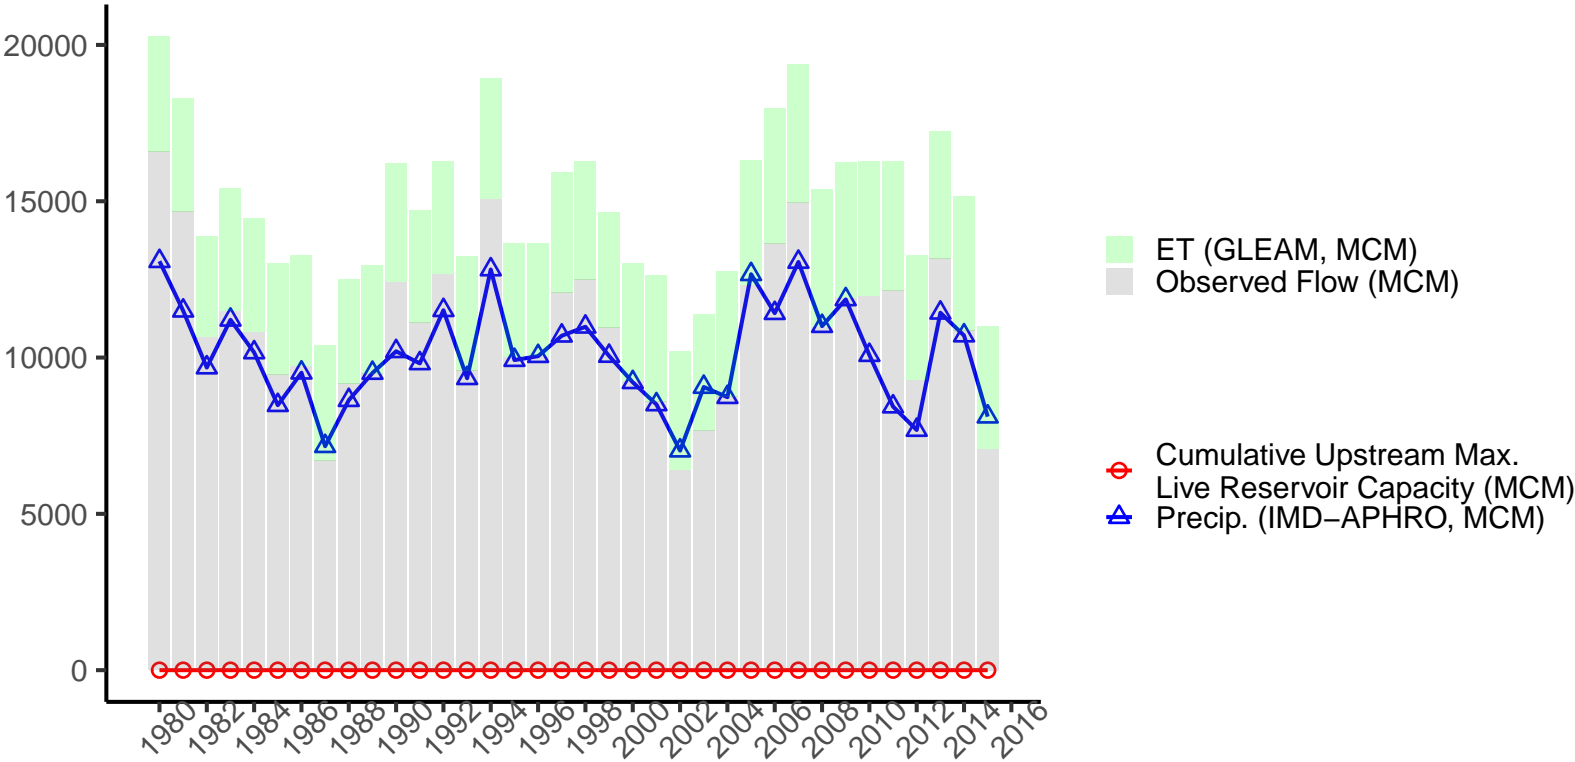

Station: Halady, River: Halady  
GHI ID: wfrs\_halad, Catch. Area: 566 sq. km

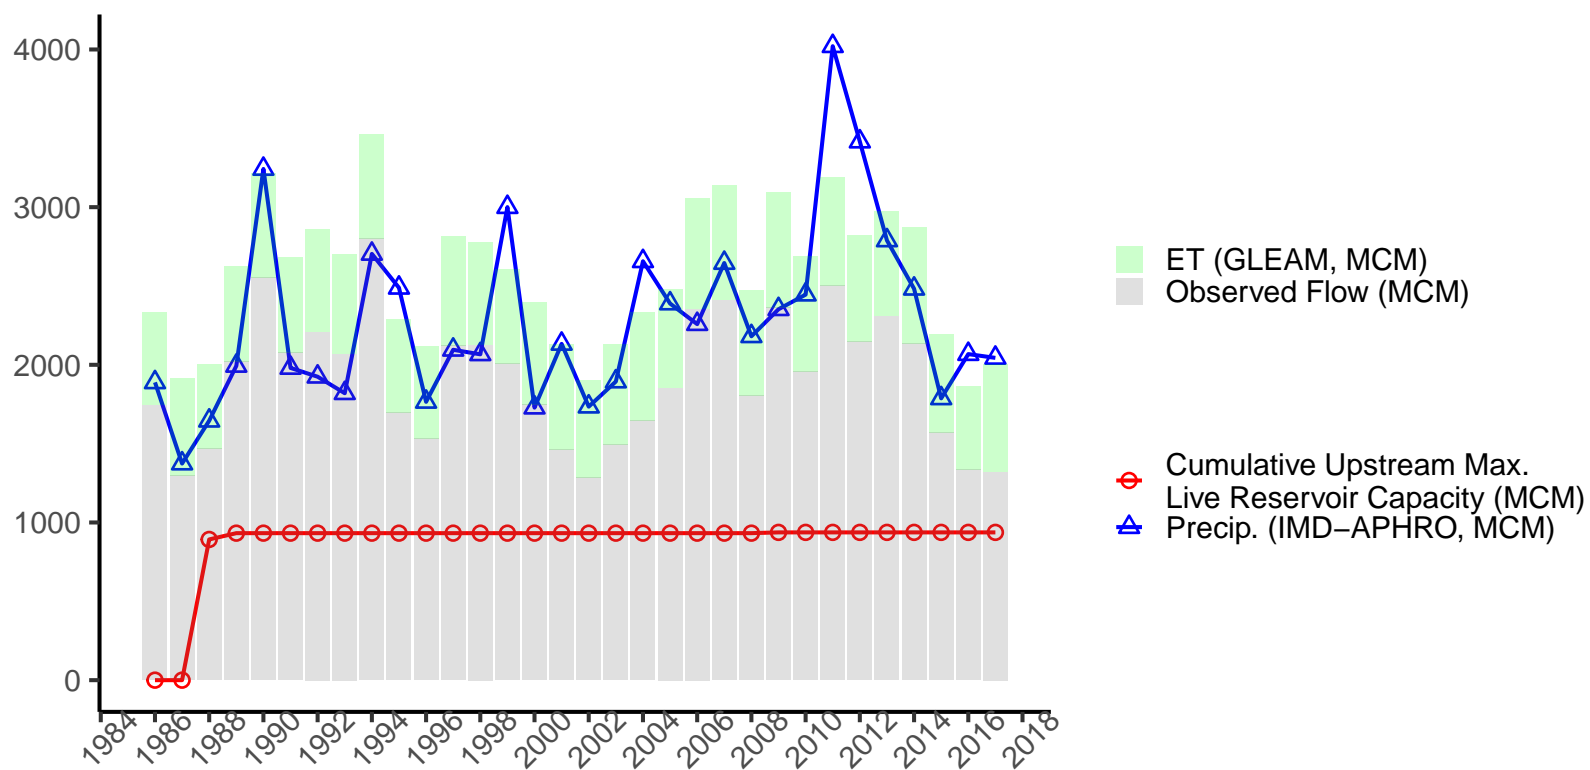

Station: Kalampur, River: Muvattupuzha/Kaliyar  
GHI ID: wfrs\_kalam, Catch. Area: 386 sq. km

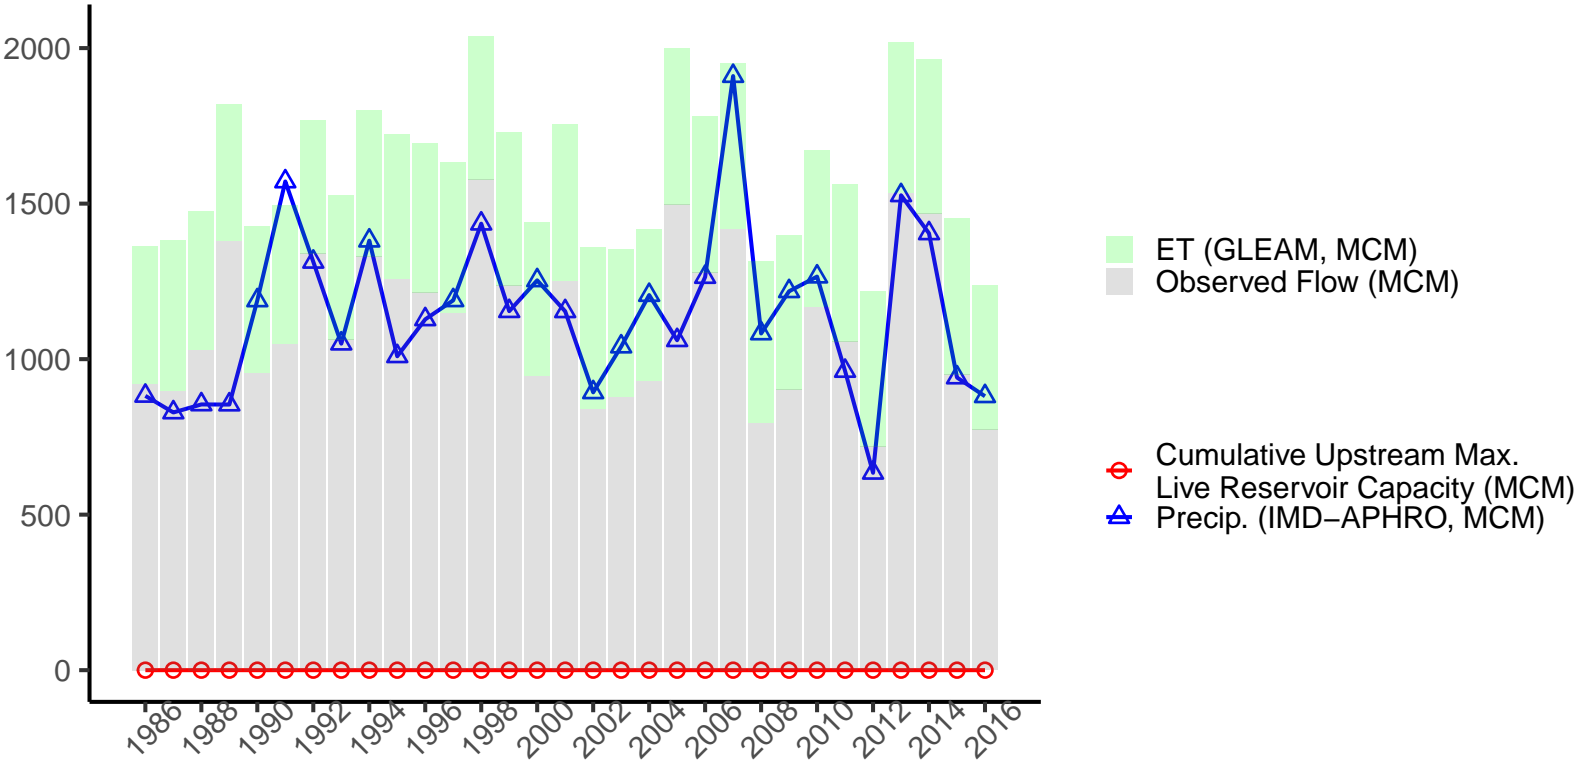

Station: Kallooppara, River: Pampa/Manimala  
GHI ID: wfrs\_kallo, Catch. Area: 733 sq. km

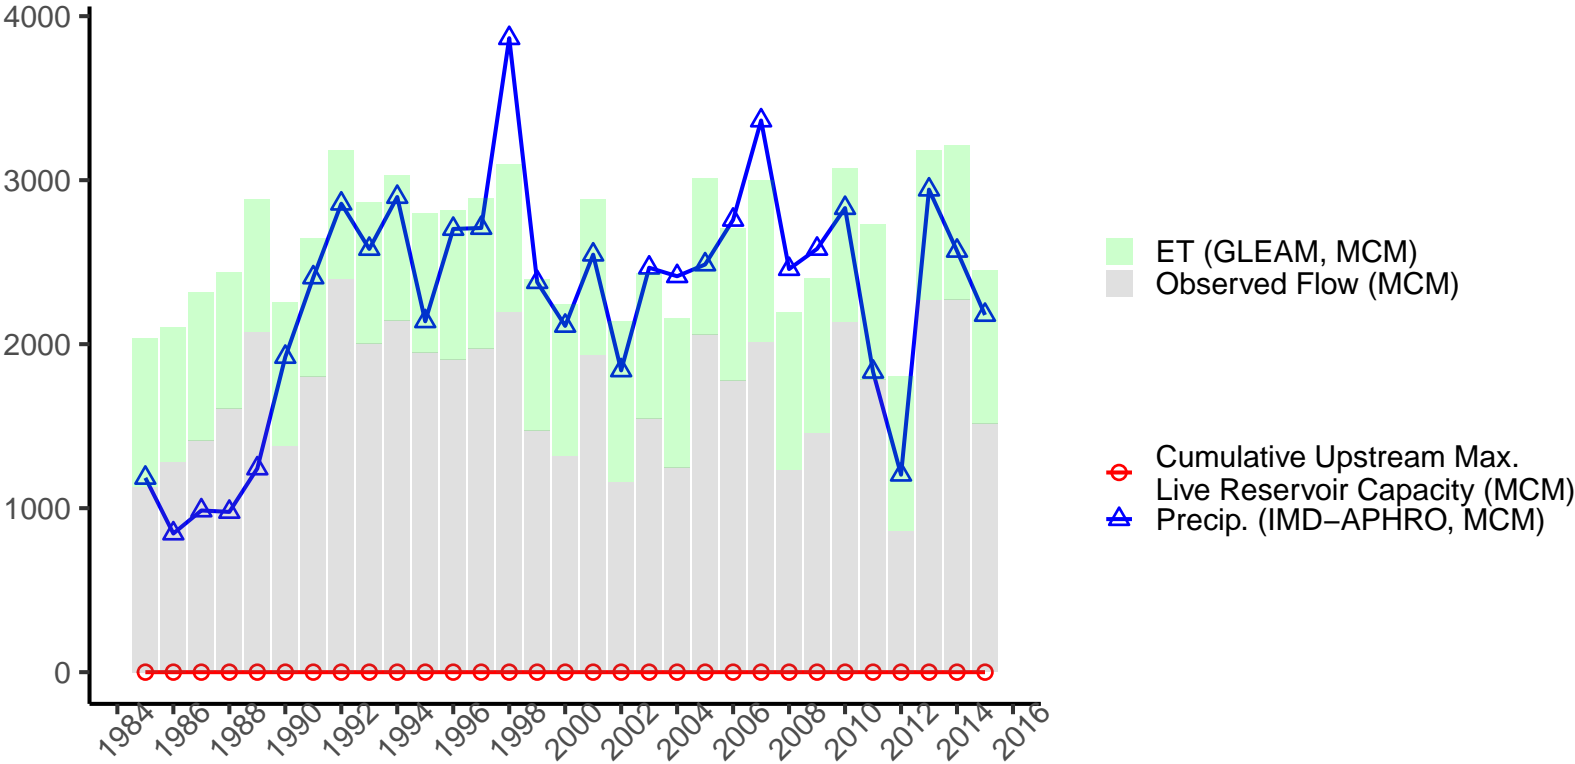

Station: Karathodu, River: Kadalundi  
GHI ID: wfrs\_karat, Catch. Area: 794 sq. km

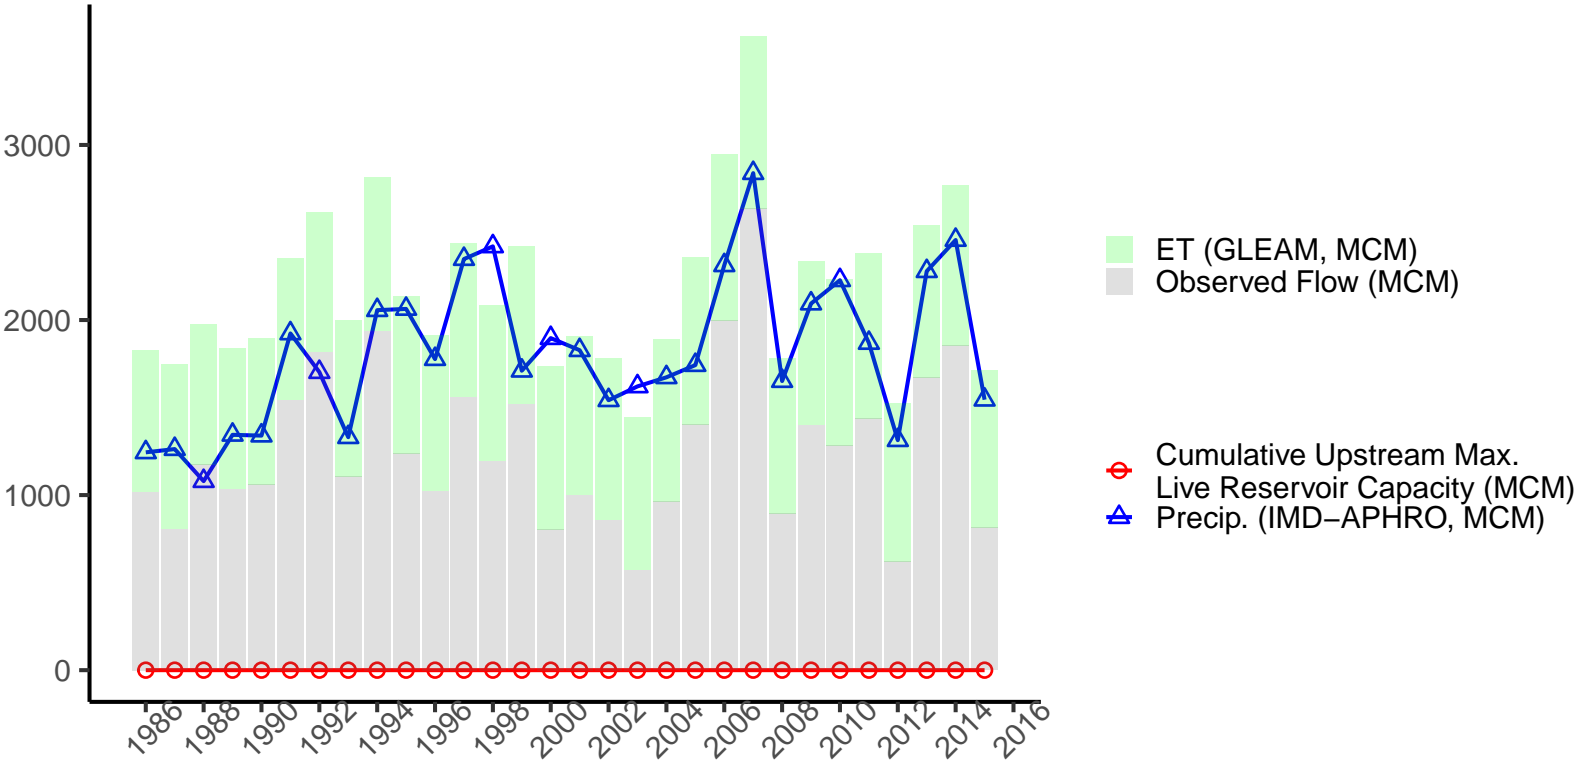



Station: Kidangoor, River: Meenachil  
GHI ID: wfrs\_kidan, Catch. Area: 618 sq. km

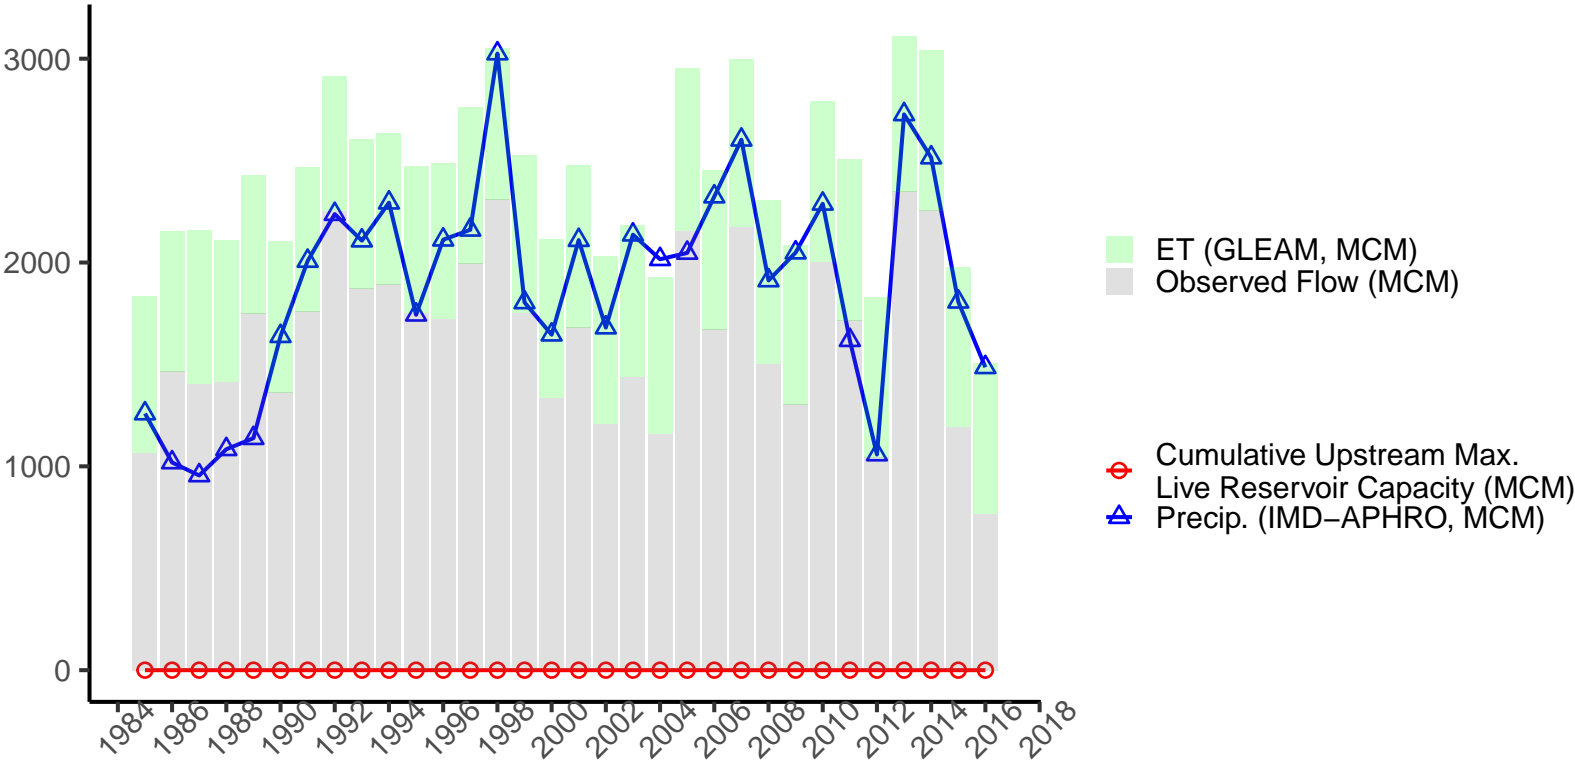

Station: Kuniyil, River: Chaliyar  
GHI ID: wfrs\_kuniy, Catch. Area: 2038 sq. km

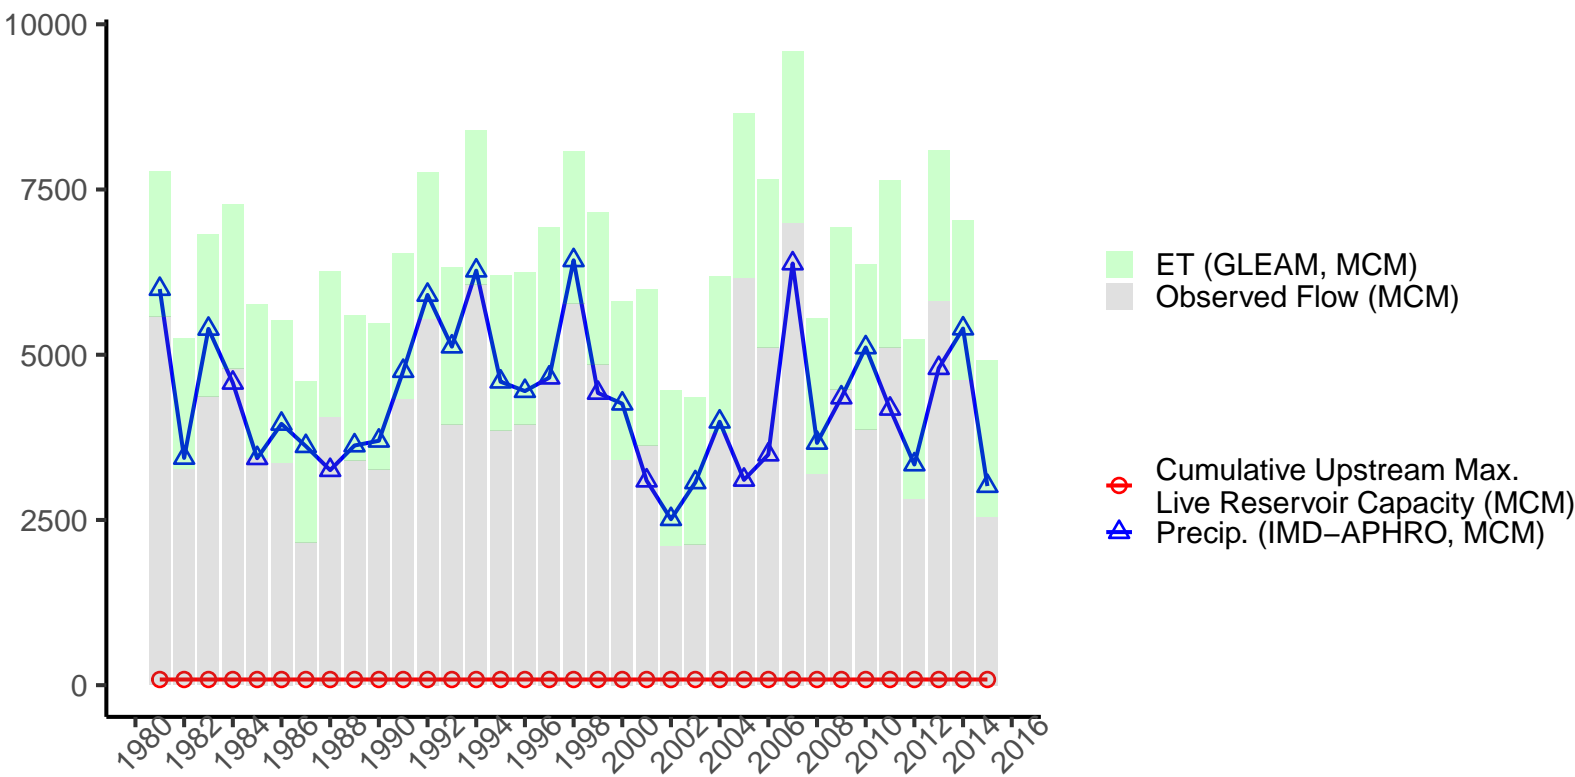

Station: Malakkara, River: Pampa  
GHI ID: wfrs\_malak, Catch. Area: 1650 sq. km

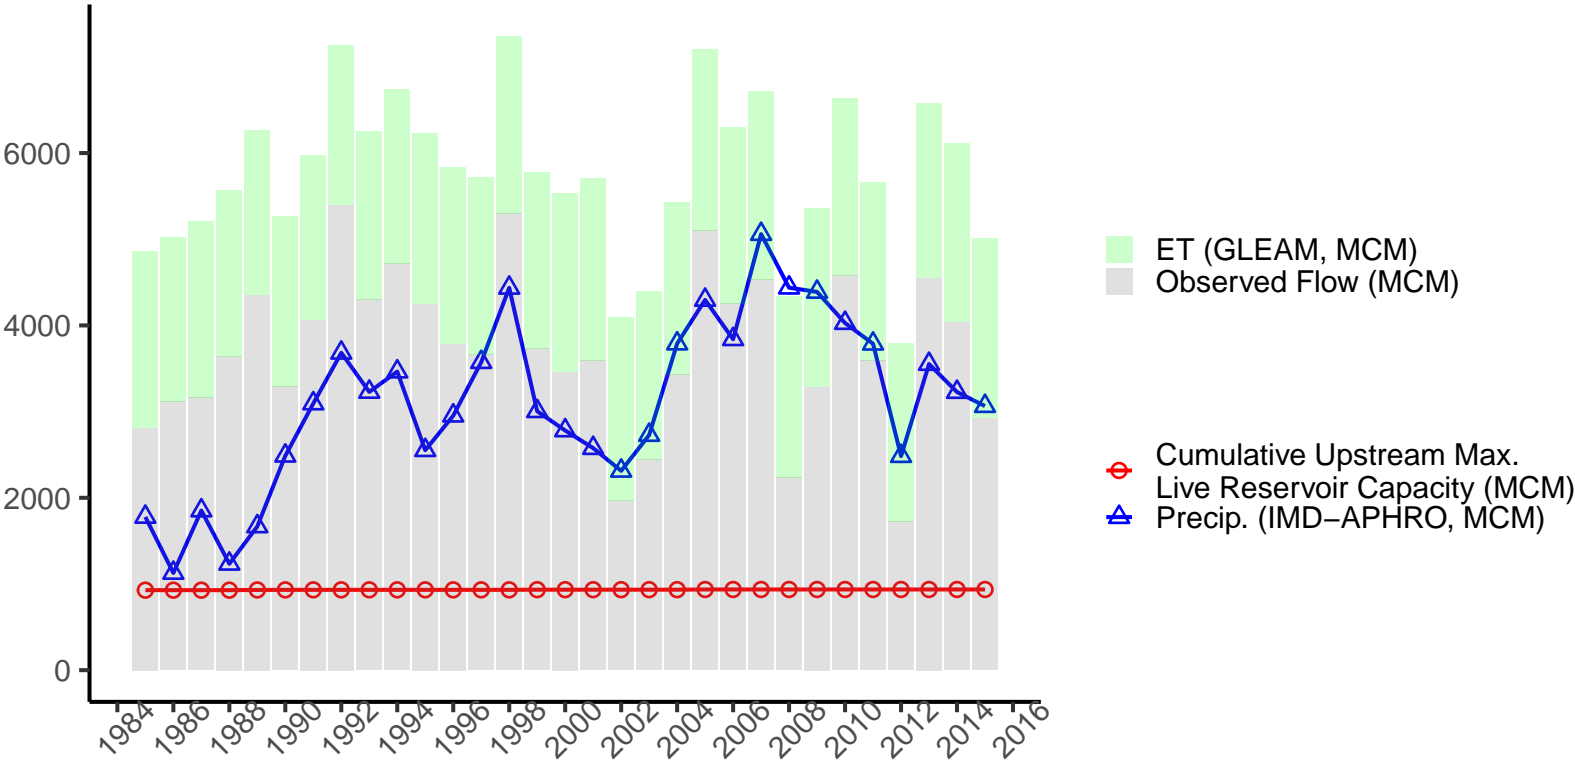

Station: Neeleswaram, River: Periyar  
GHI ID: wfrrs\_neele, Catch. Area: 4150 sq. km

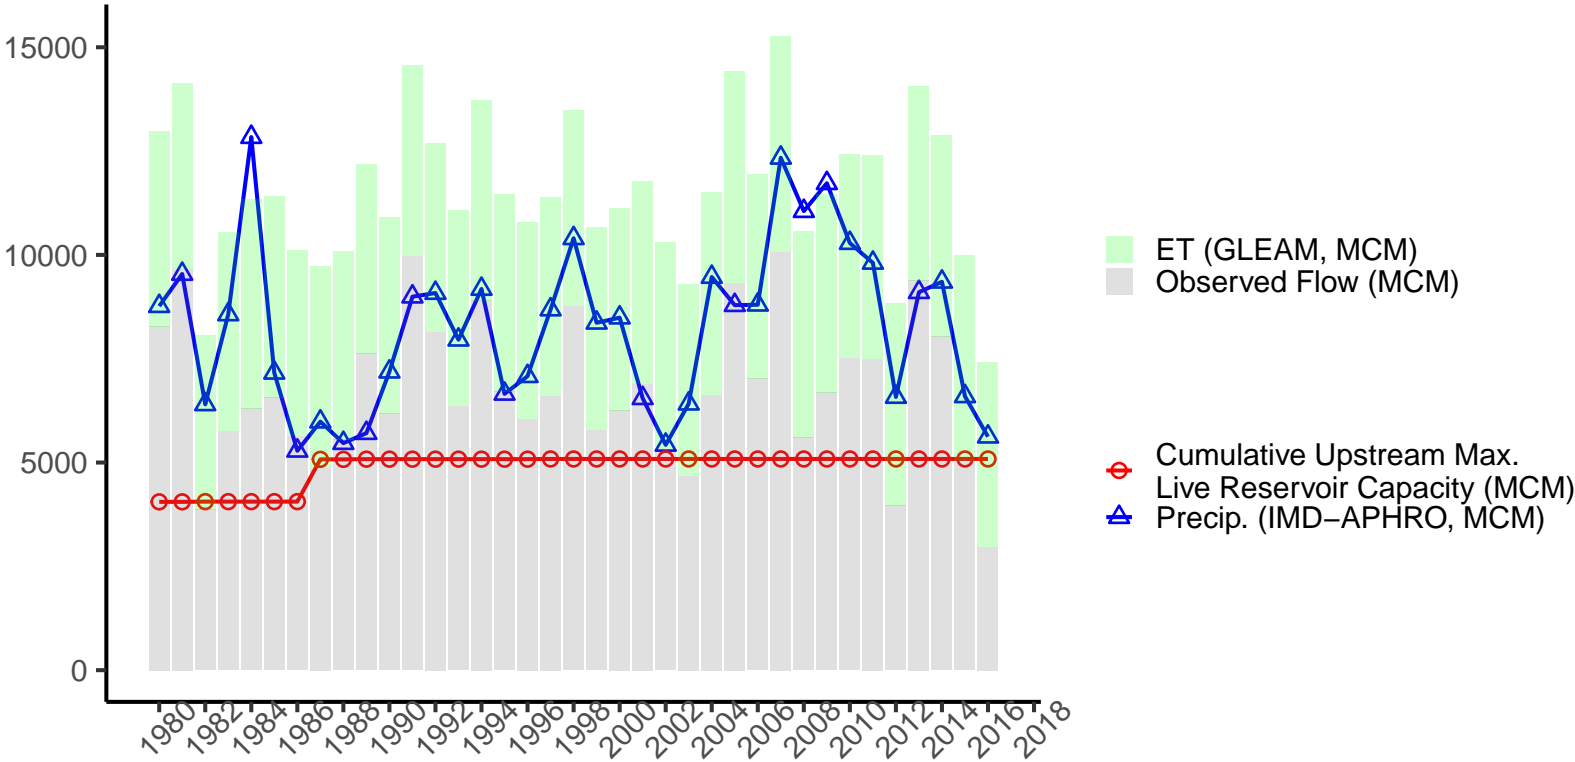

Station: Pattazhy, River: Kallada  
GHI ID: wfrs\_patta, Catch. Area: 1221 sq. km

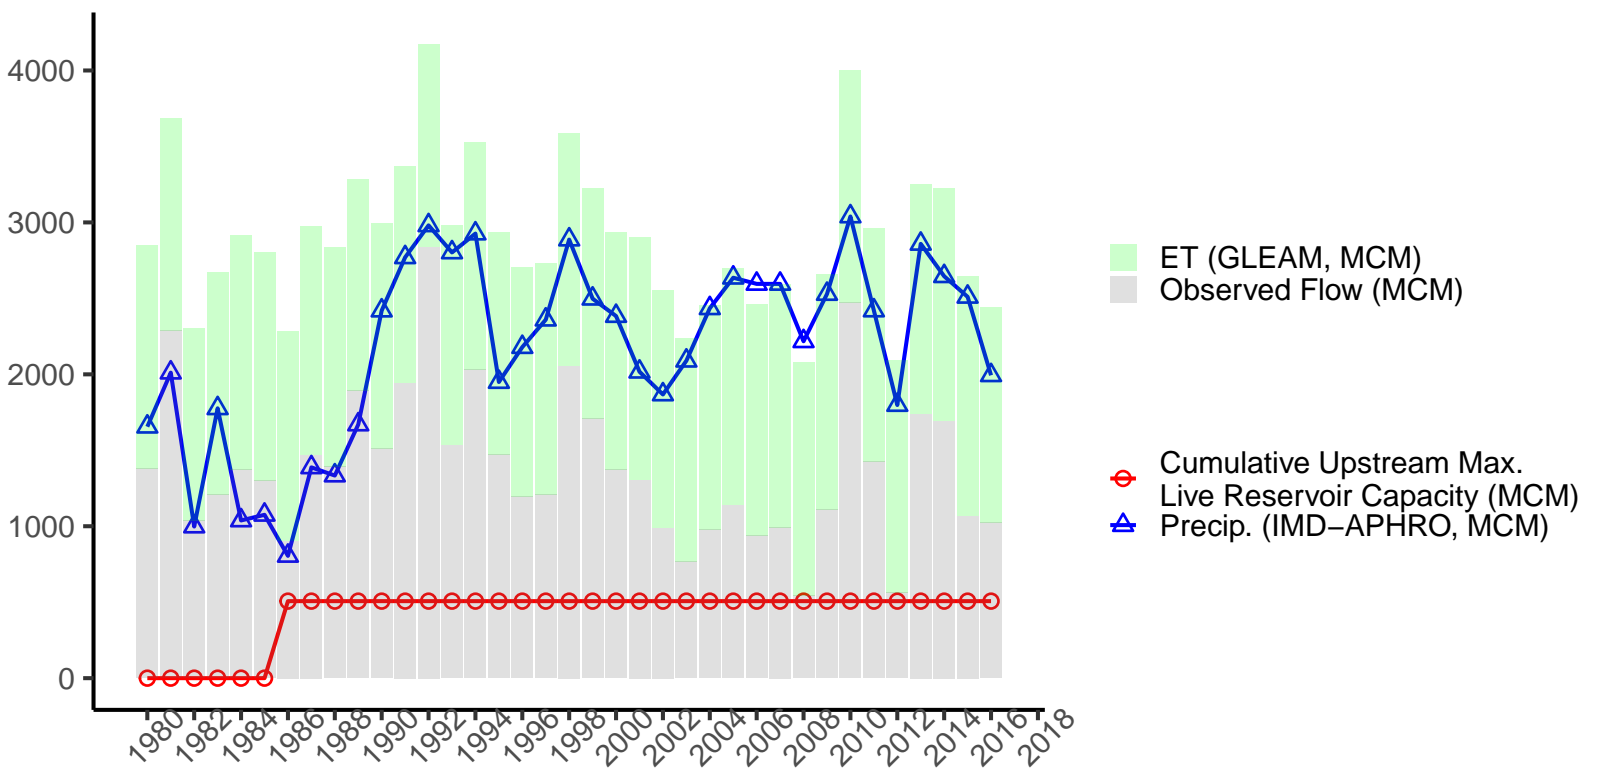

Station: Perumannu, River: Valapatnam  
GHI ID: wfrs\_perum, Catch. Area: 1069 sq. km

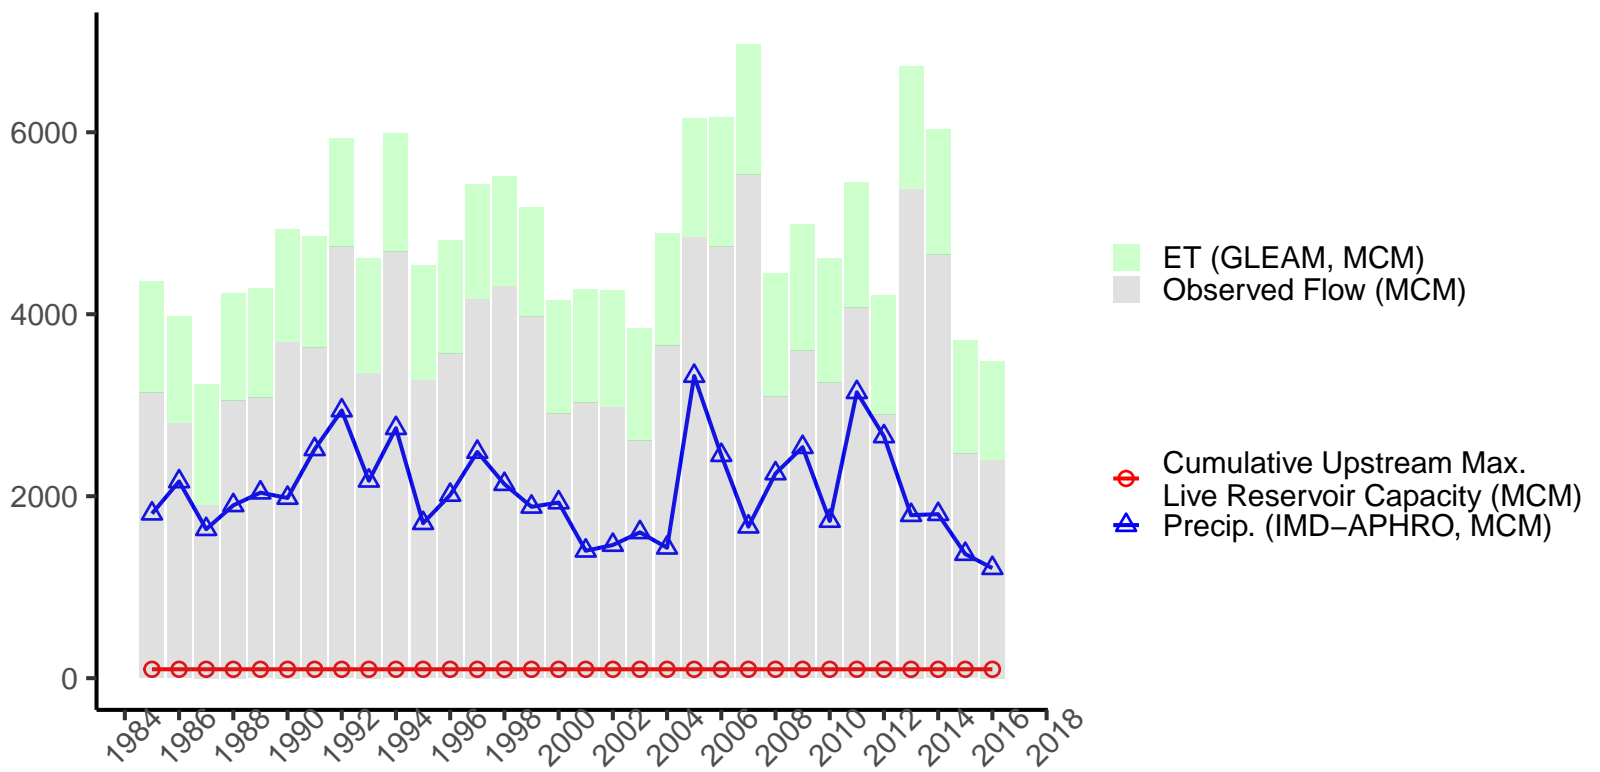

Station: Pulamanthole, River: Bharathapuzha/Pulanthodu  
GHI ID: wfrs\_pulam, Catch. Area: 923 sq. km

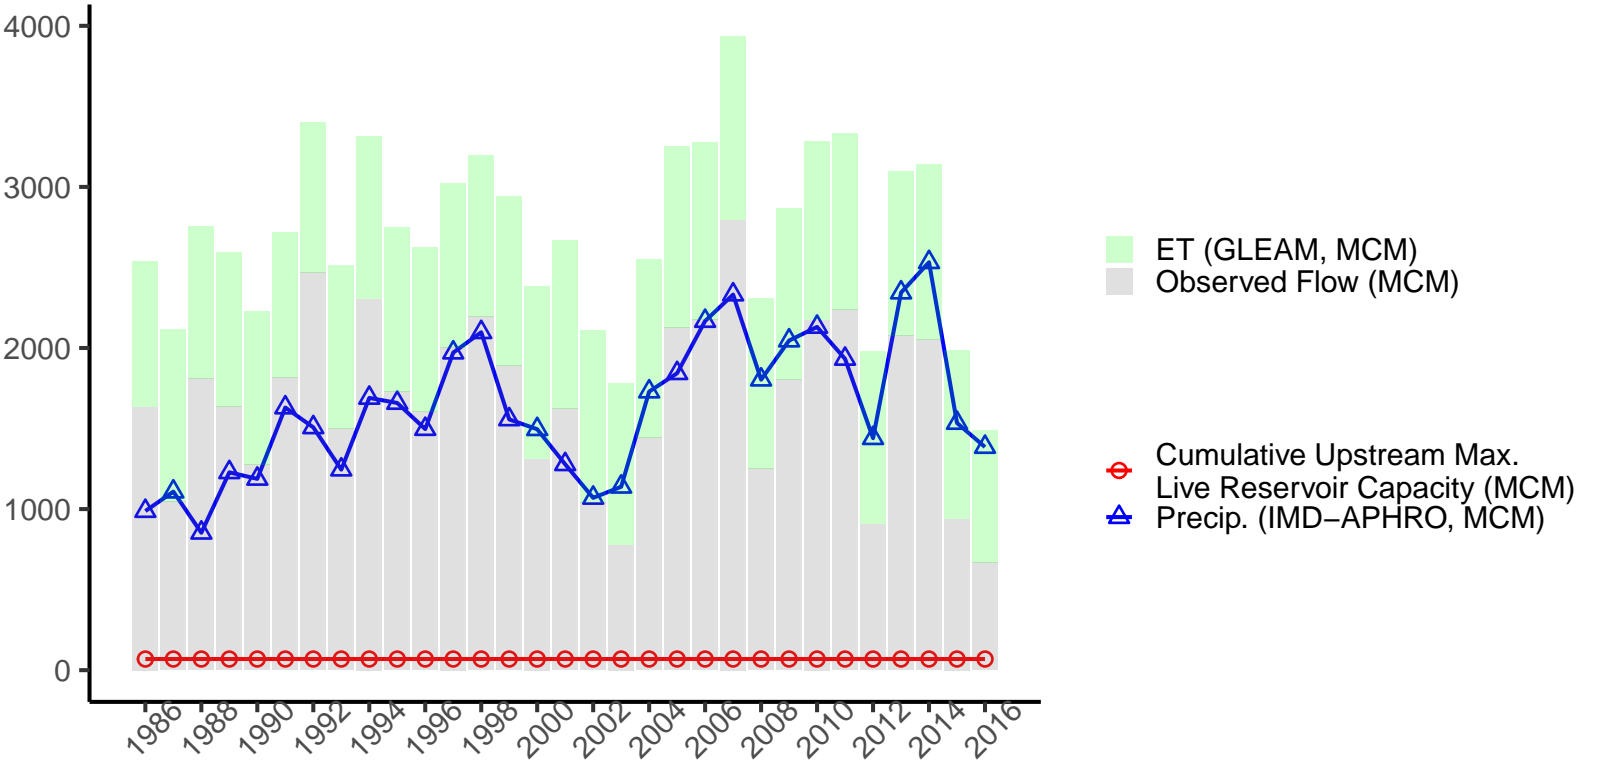

Station: Ramamangalam, River: Muvattupuzha  
GHI ID: wfrs\_ramam, Catch. Area: 1482 sq. km

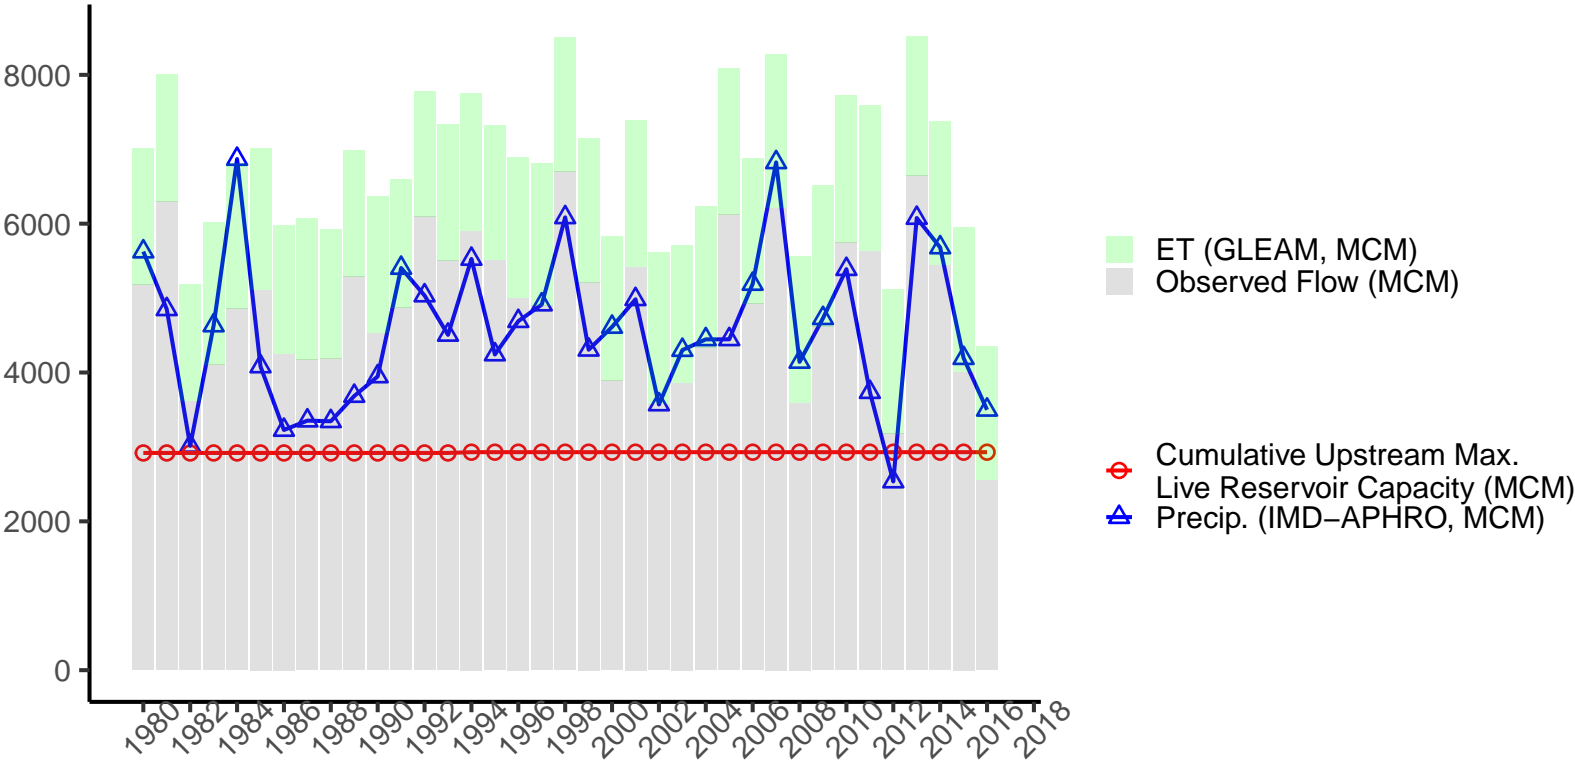



Station: Thumpamon, River: Pamba/Achankovil  
GHI ID: wfrs\_thump, Catch. Area: 839 sq. km

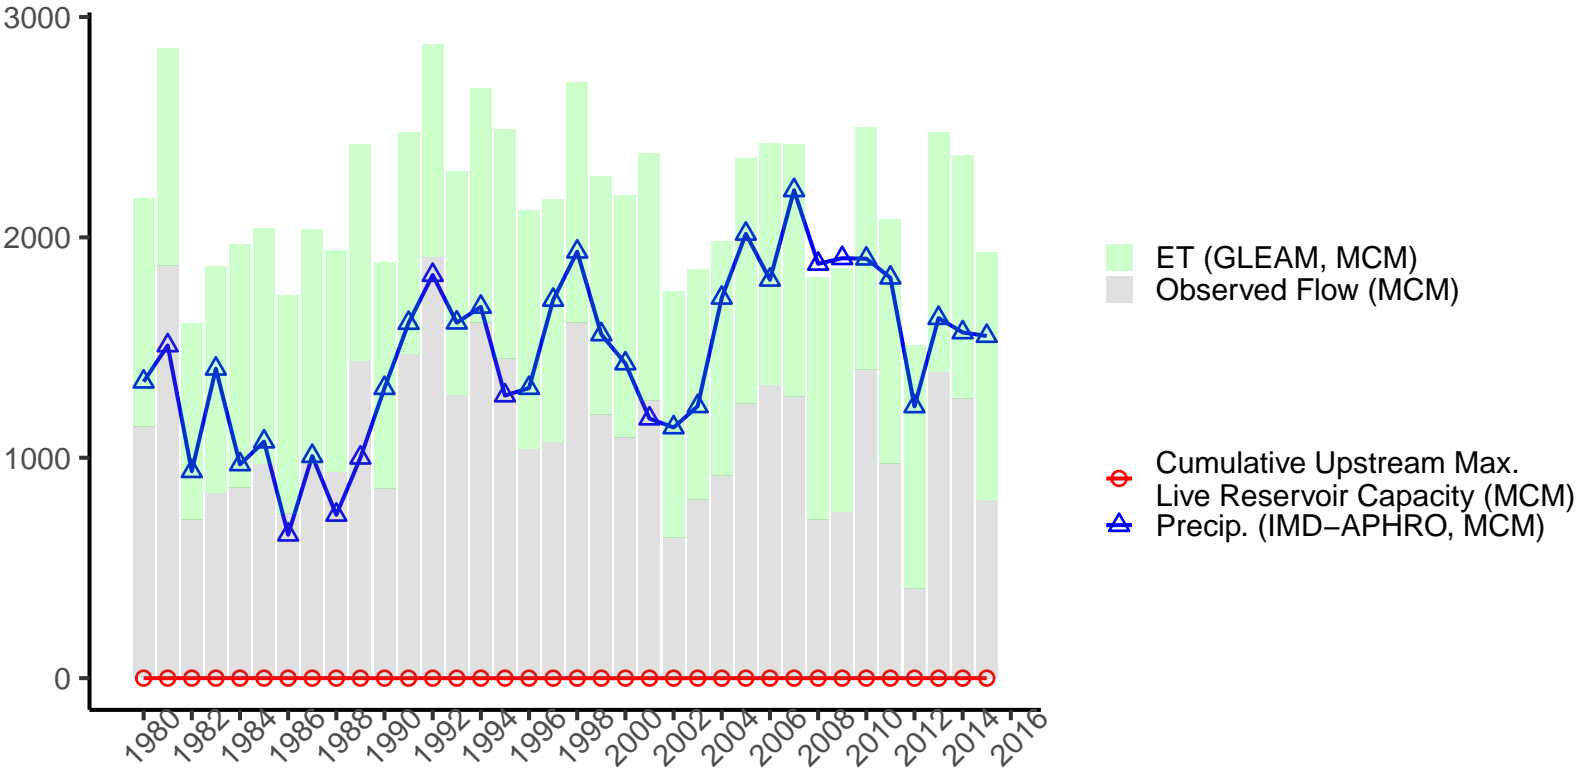

Station: Yennehole, River: Swarna  
GHI ID: wfrs\_yenne, Catch. Area: 357 sq. km

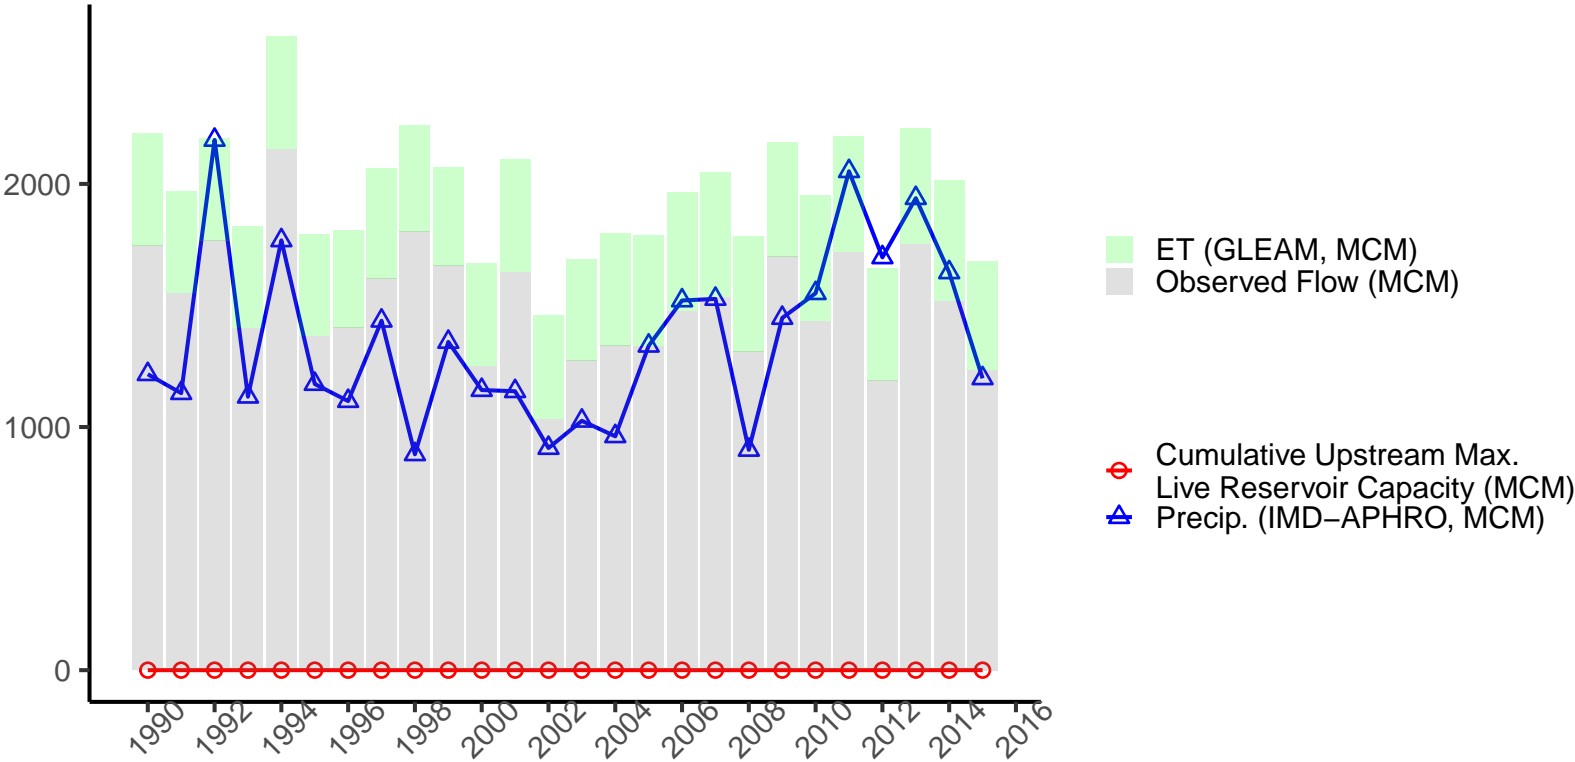

Station: Anna Purna Ghat, River: Barak  
GHI ID: gbm\_x\_anna, Catch. Area: 19235 sq. km

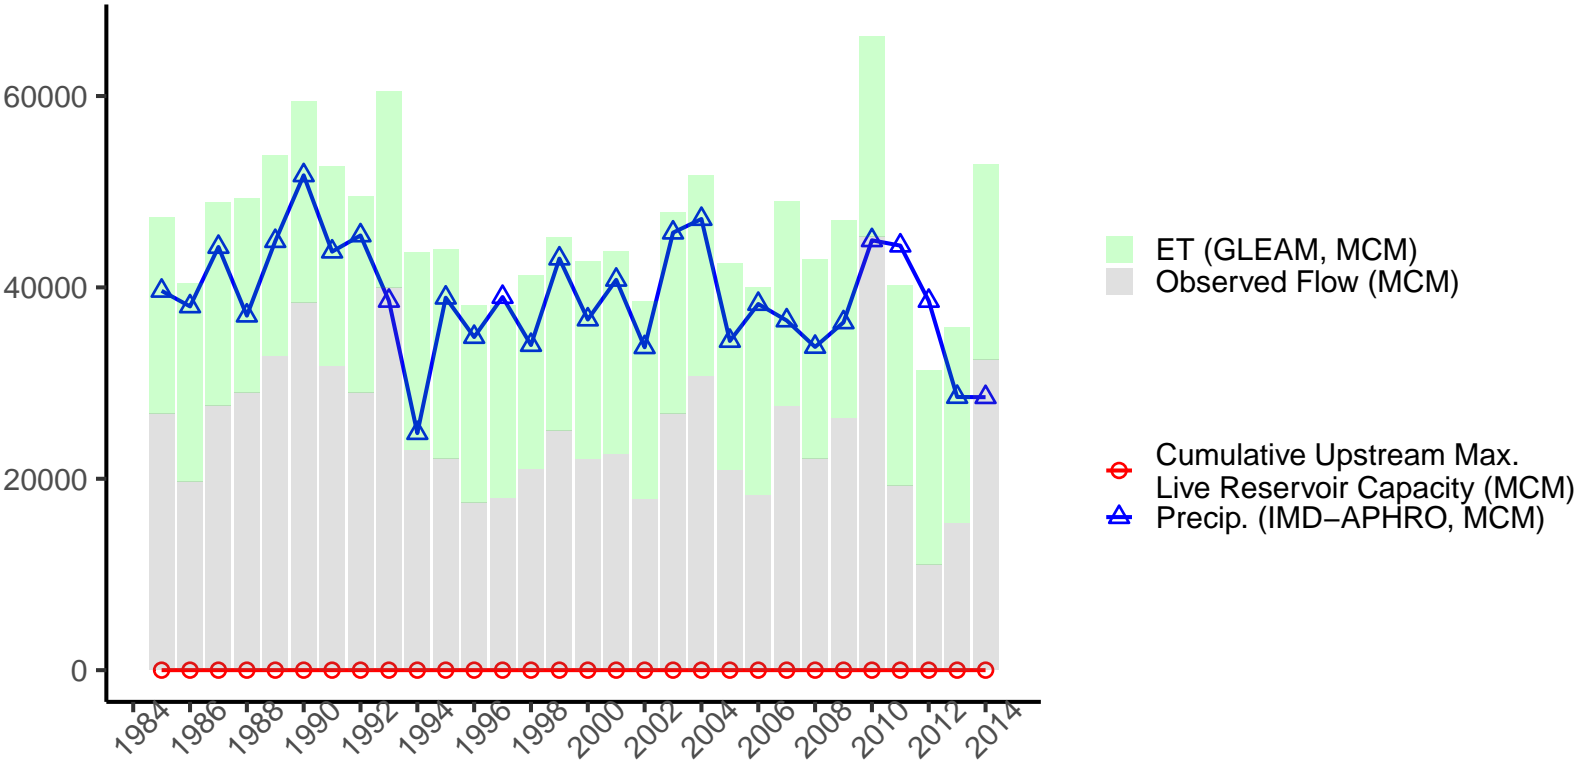

Station: Pancharatna, River: Brahmaputra  
GHI ID: gbm\_x\_panch, Catch. Area: 458992 sq. km

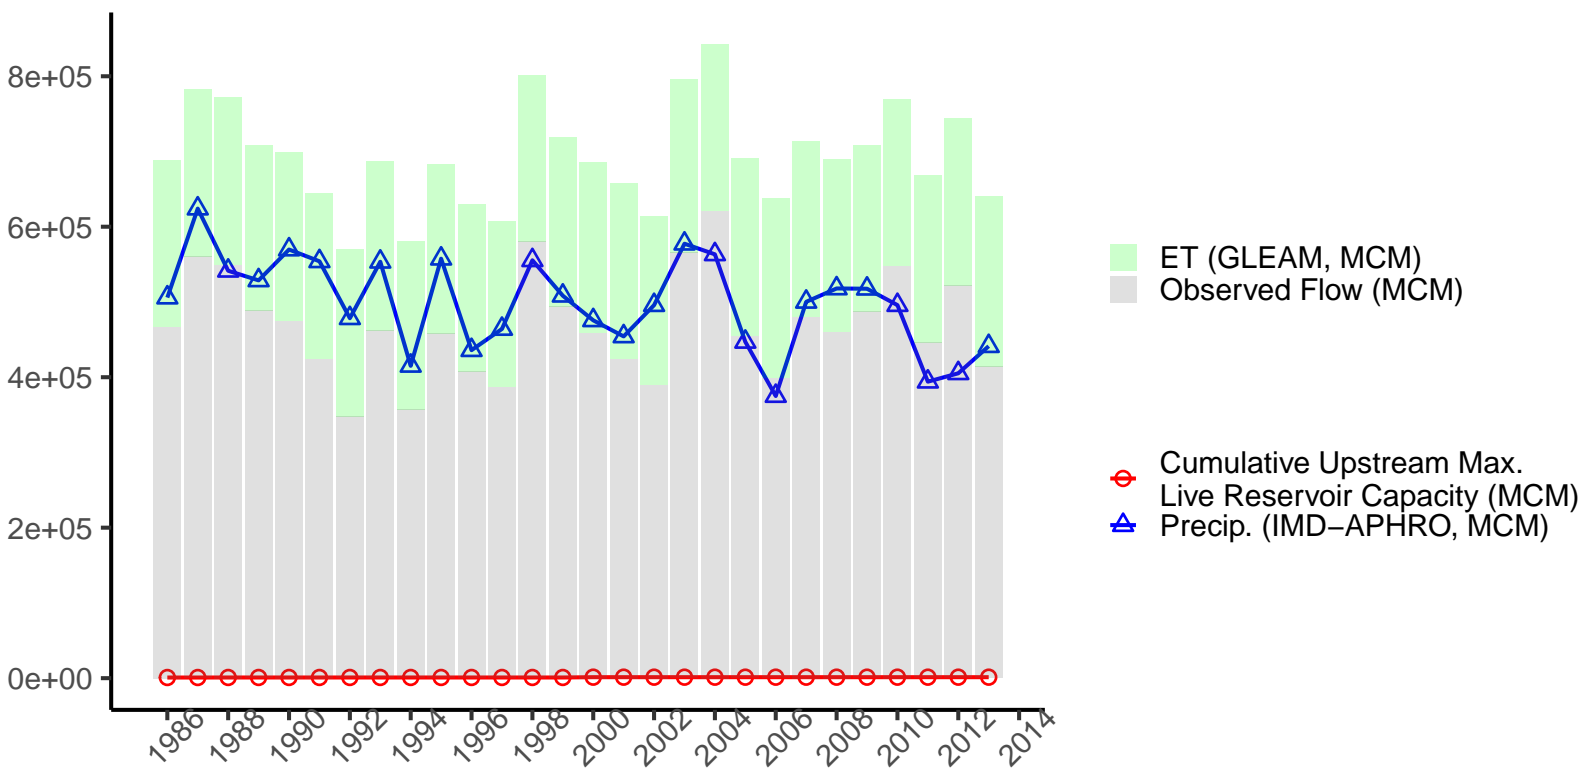

Station: Dabri, River: Ganga/Ramganga  
GHI ID: gbm\_x\_dabri, Catch. Area: 24606 sq. km

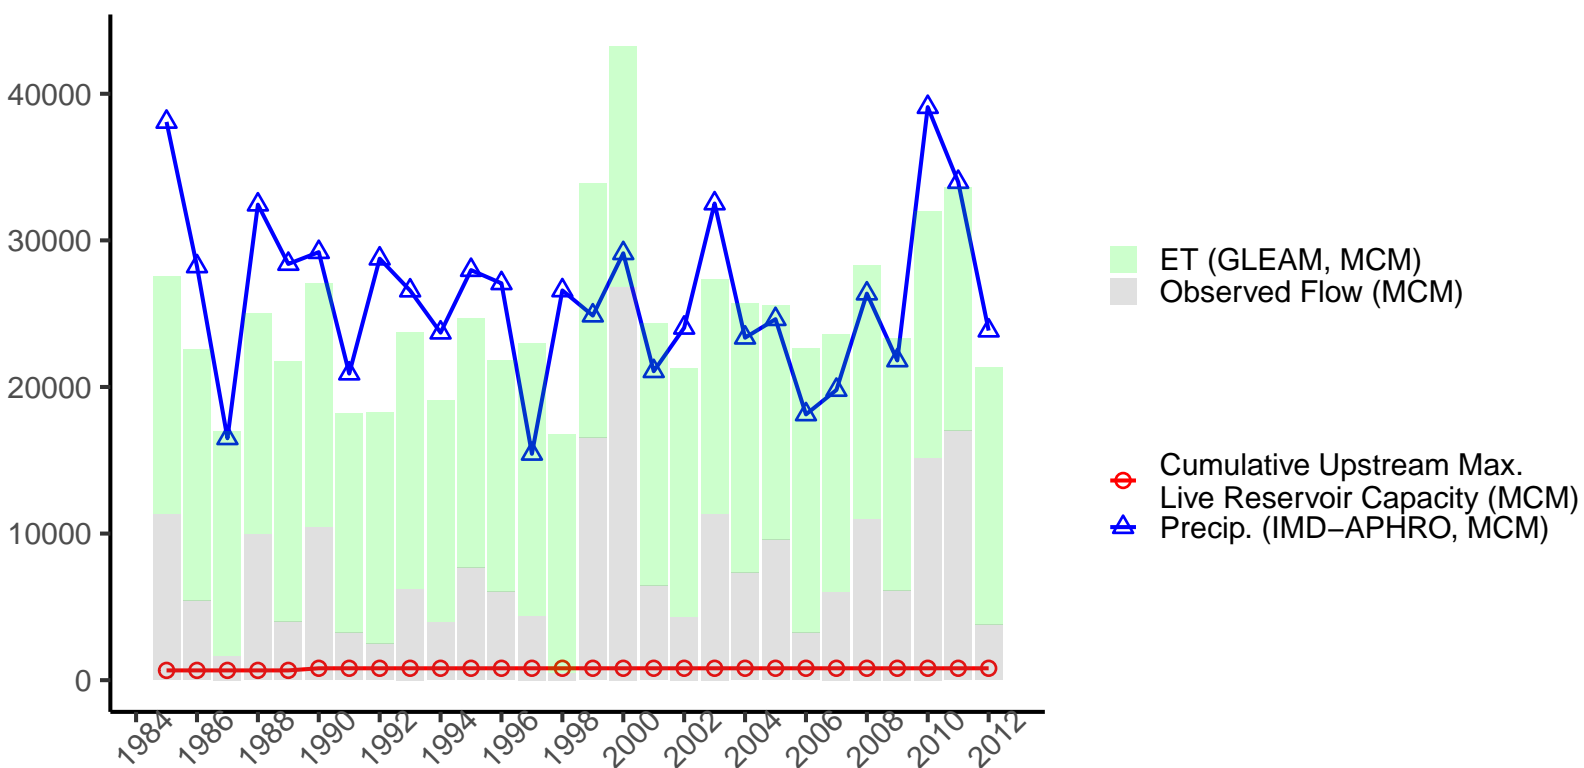

Station: Tulargram, River: Sonai  
GHI ID: gbm\_x\_tular, Catch. Area: 3182 sq. km

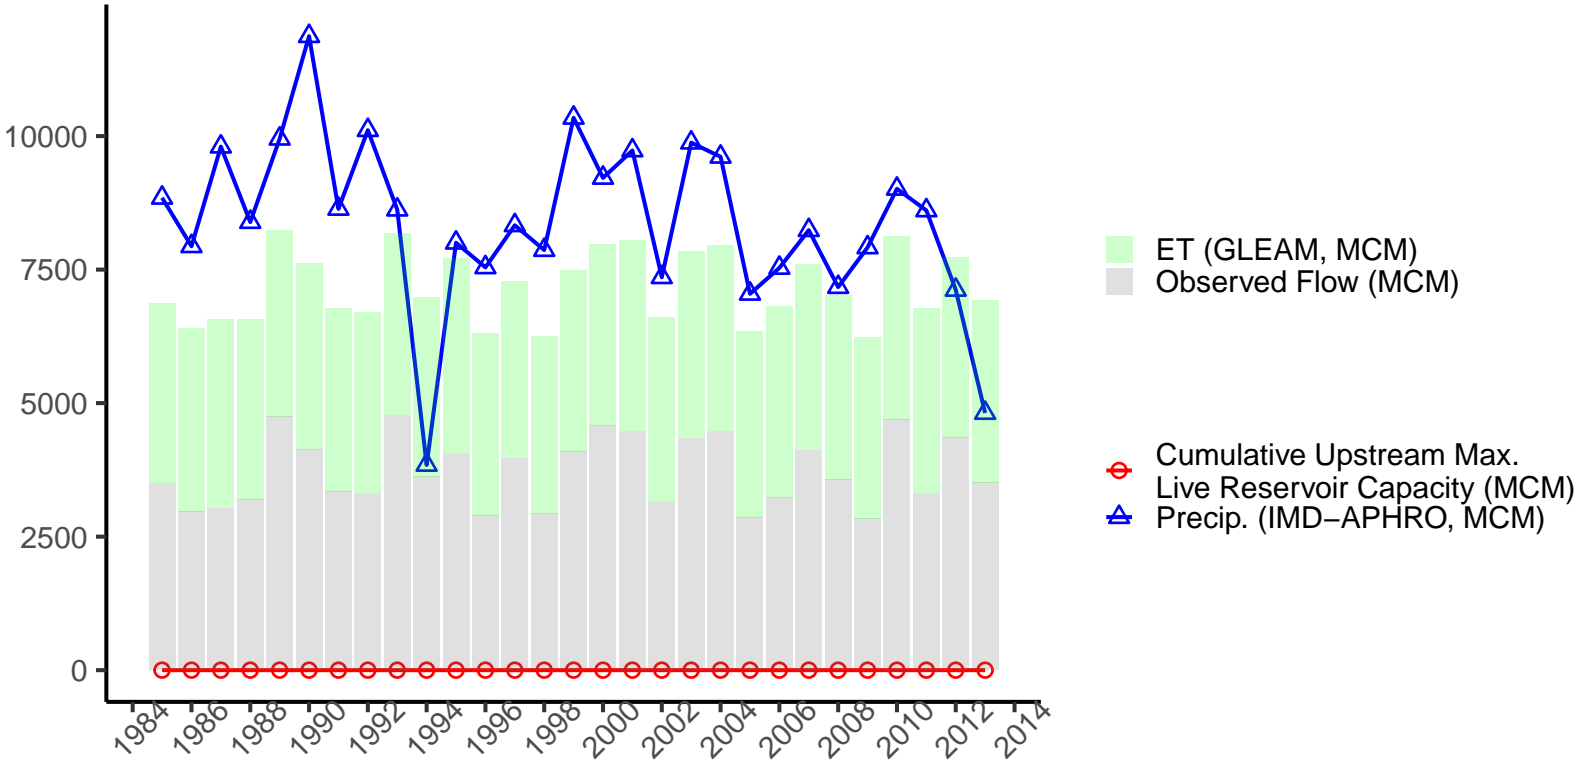

Station: Cherribeda, River: Godavari/Indravati/Bardha  
GHI ID: goda\_cherr, Catch. Area: 1026 sq. km

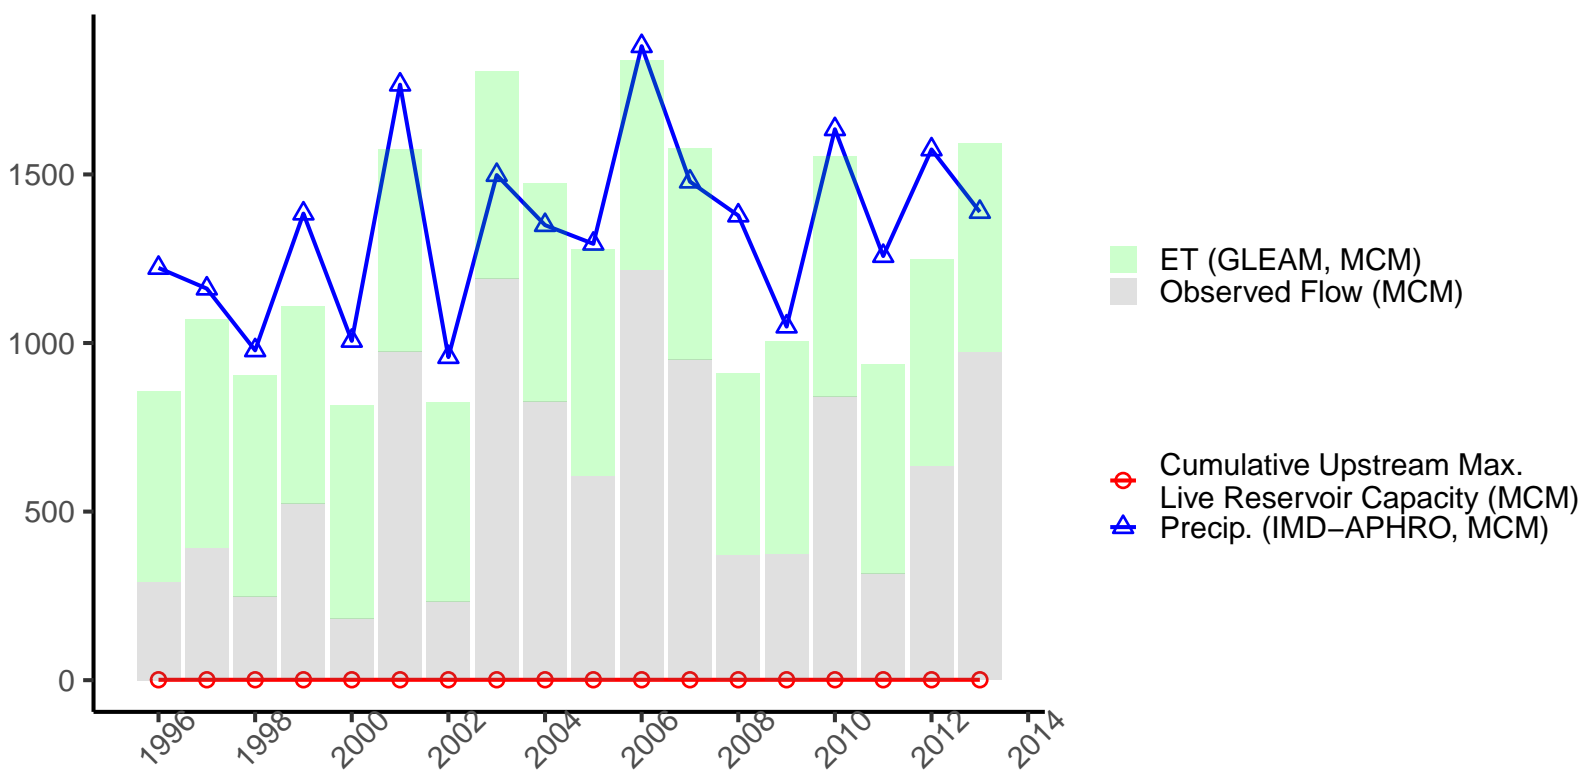

Station: Konta, River: Godavari/Sabari  
GHI ID: goda\_konta, Catch. Area: 20334 sq. km

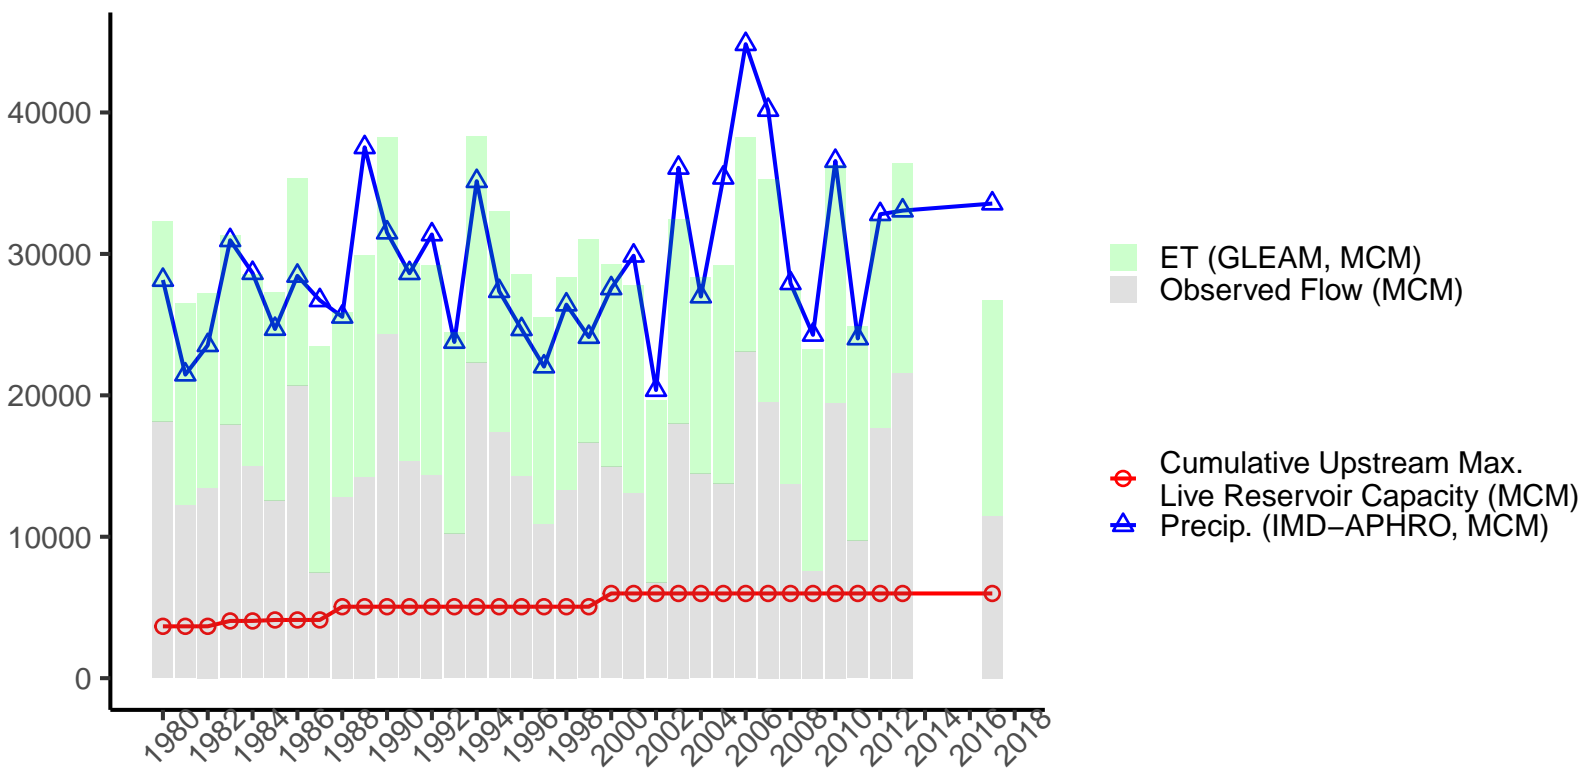



Station: Nowrangpur, River: Godavari/Indravati  
GHI ID: goda\_nowra, Catch. Area: 3661 sq. km

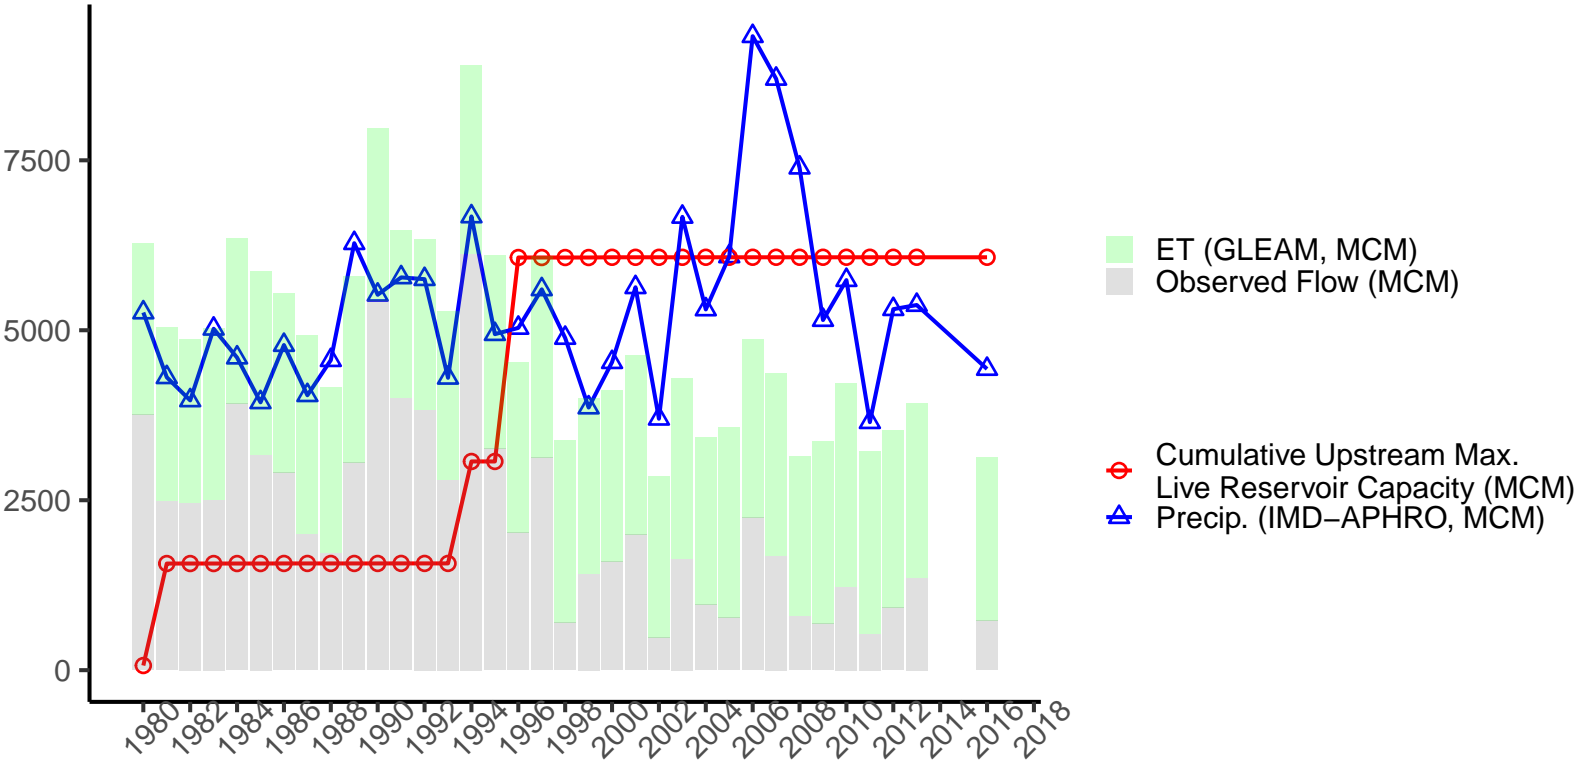

Station: Rajegaon, River: Godavari/Pranhita/Bagh  
GHI ID: goda\_rajeg, Catch. Area: 5403 sq. km

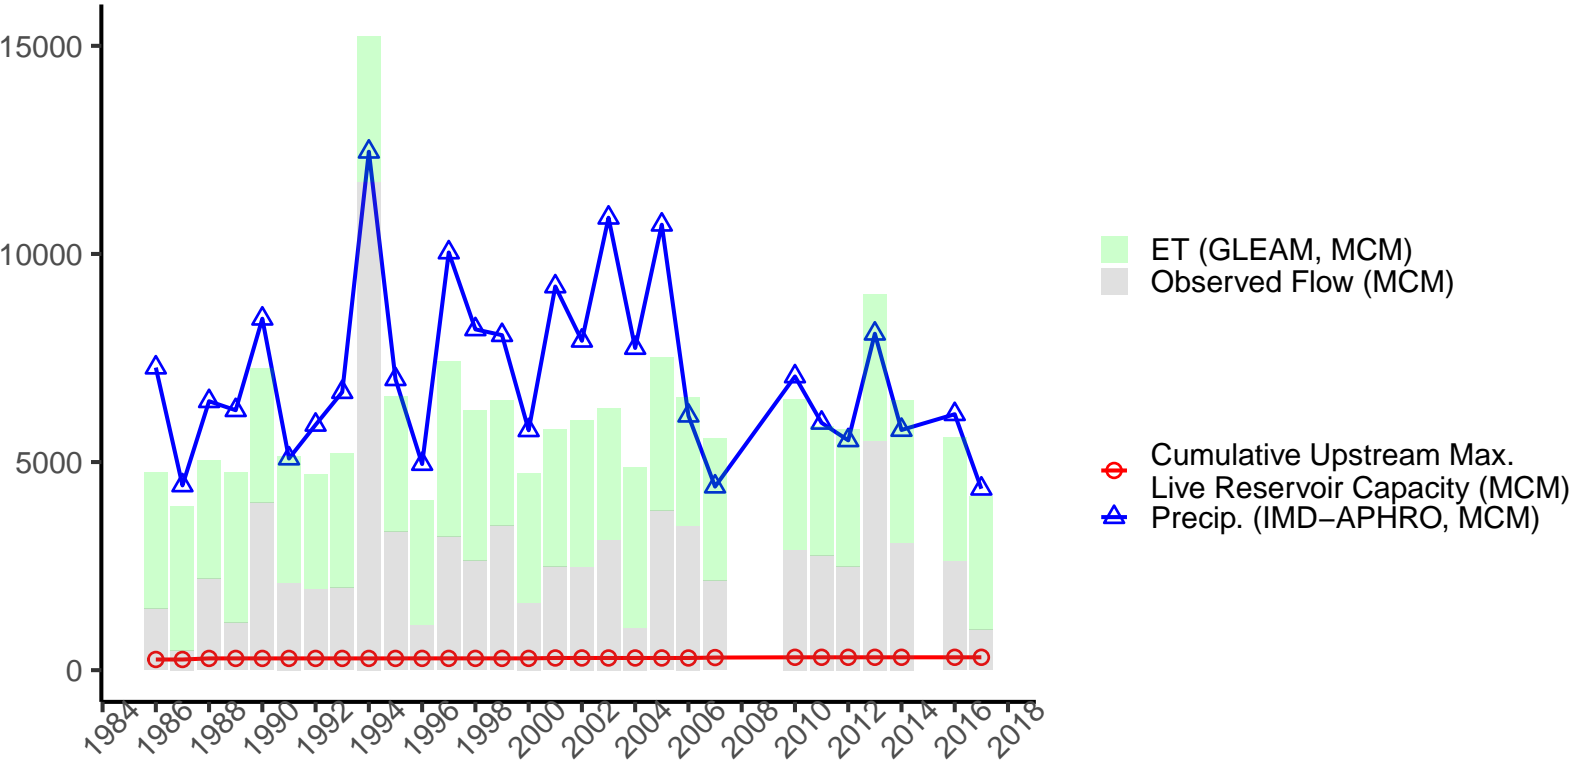

Station: Byaladahalli, River: Krishna/Tungabhadra/Tunga  
GHI ID: kris\_byala, Catch. Area: 2508 sq. km

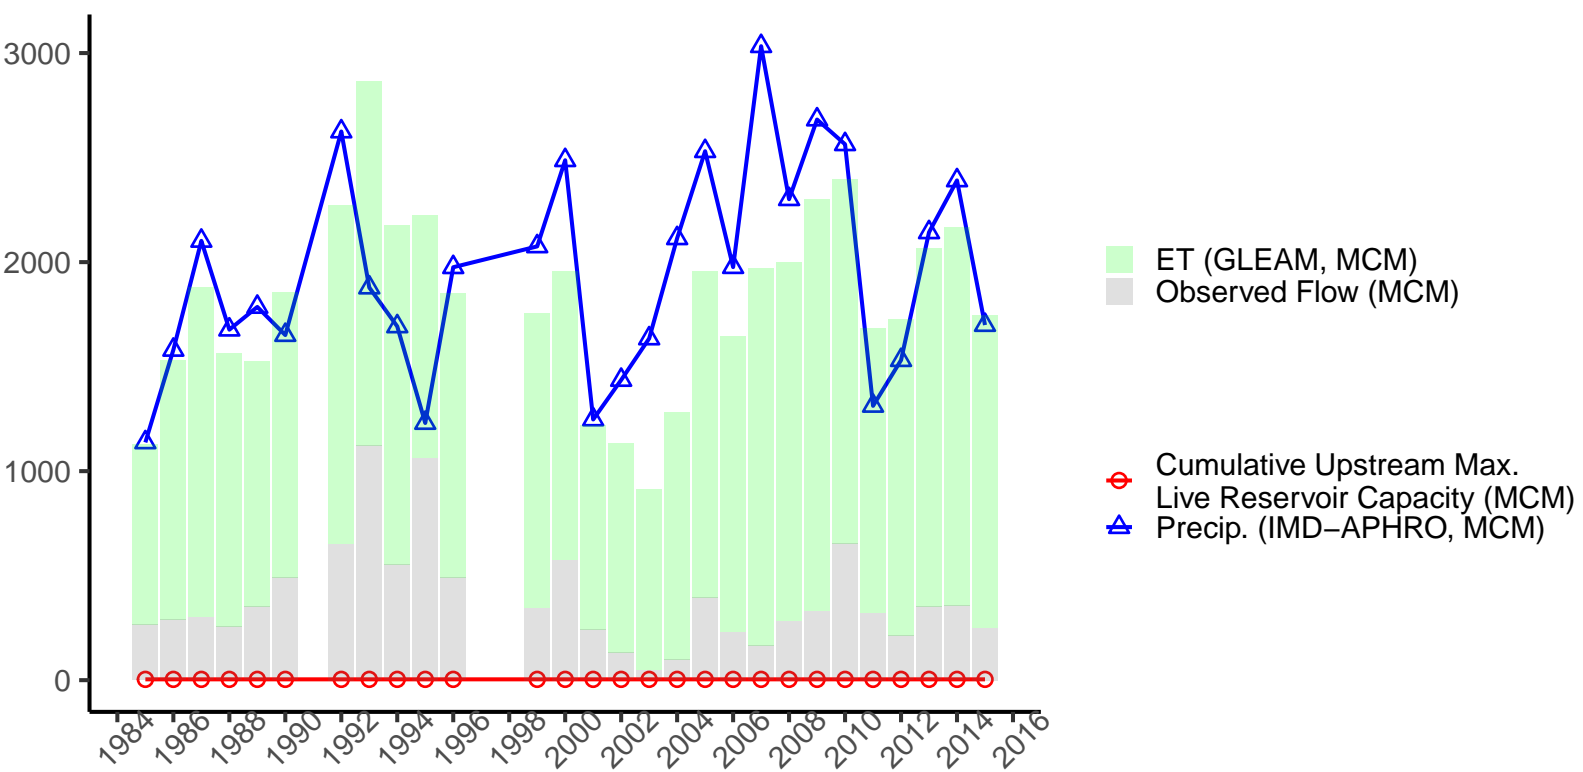

Station: Daund, River: Krishna/Bhima  
GHI ID: kris\_daund, Catch. Area: 11439 sq. km

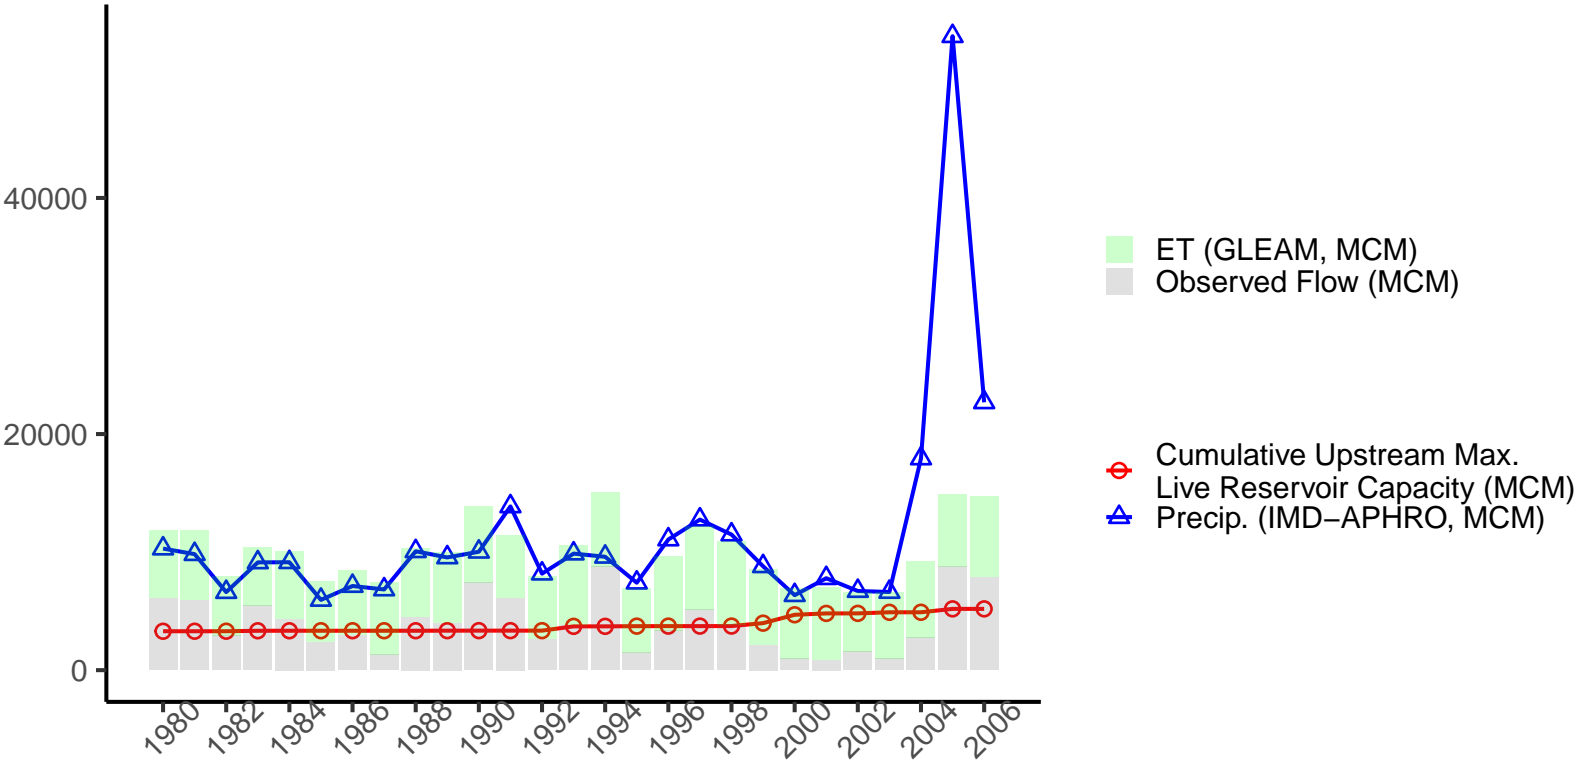

Station: Huvinhedigi, River: Krishna  
GHI ID: kris\_huvin, Catch. Area: 54166 sq. km

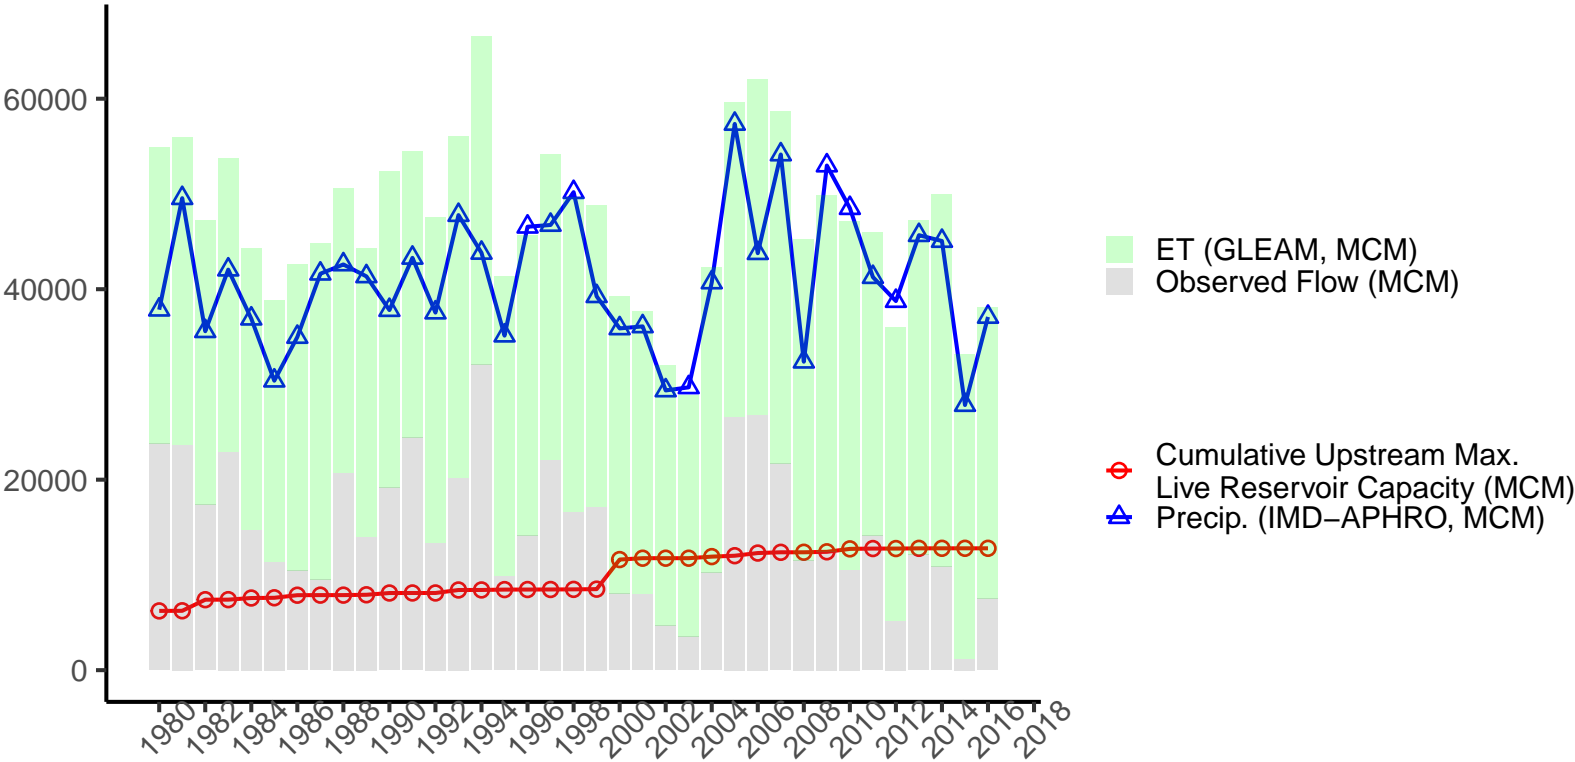

Station: Narsingpur, River: Krishna/Bhima  
GHI ID: kris\_narsi, Catch. Area: 22326 sq. km

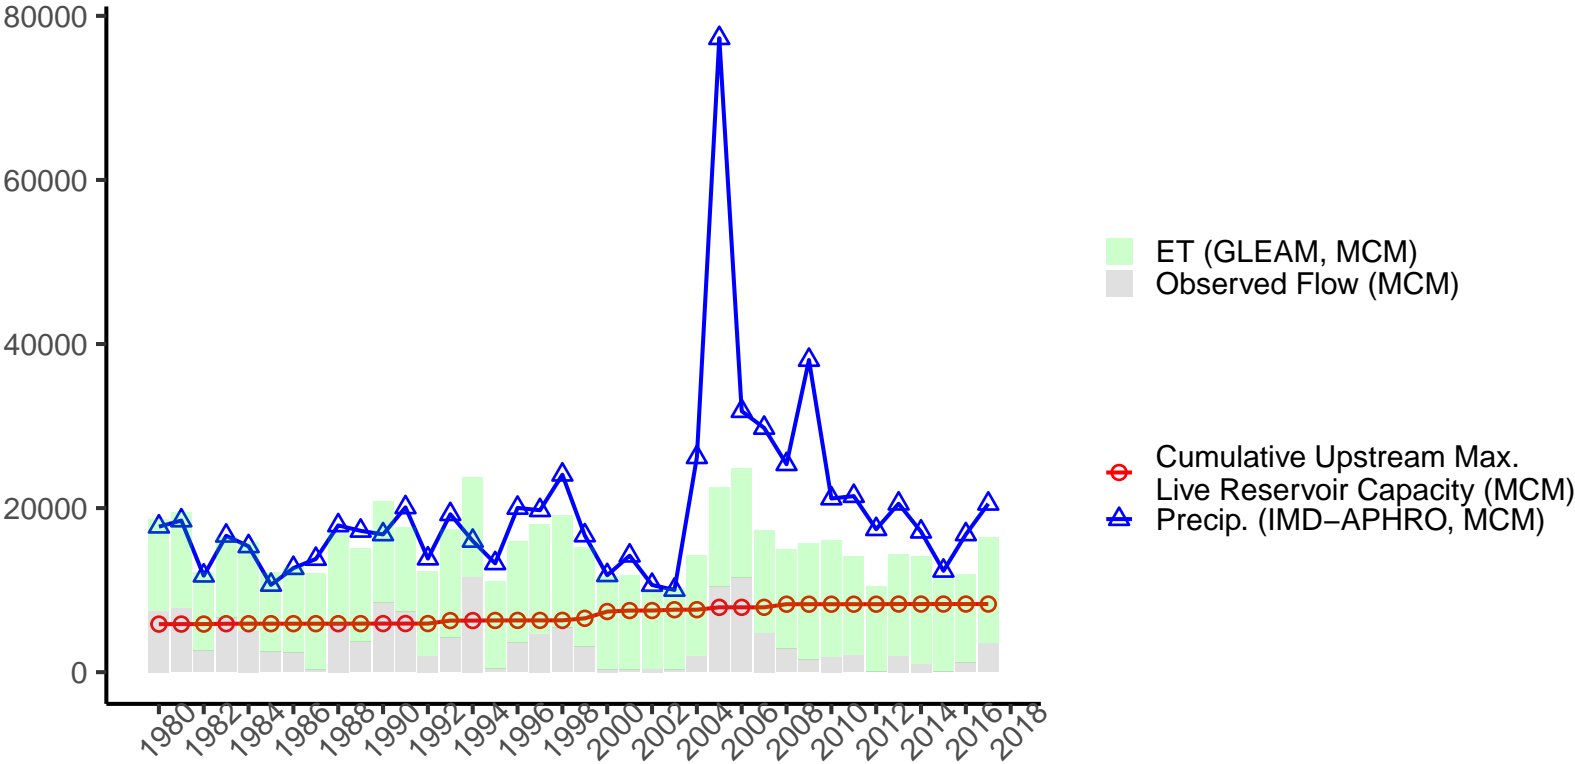

Station: Sarati, River: Krishna/Bhima/Nira  
GHI ID: kris\_sarat, Catch. Area: 6807 sq. km

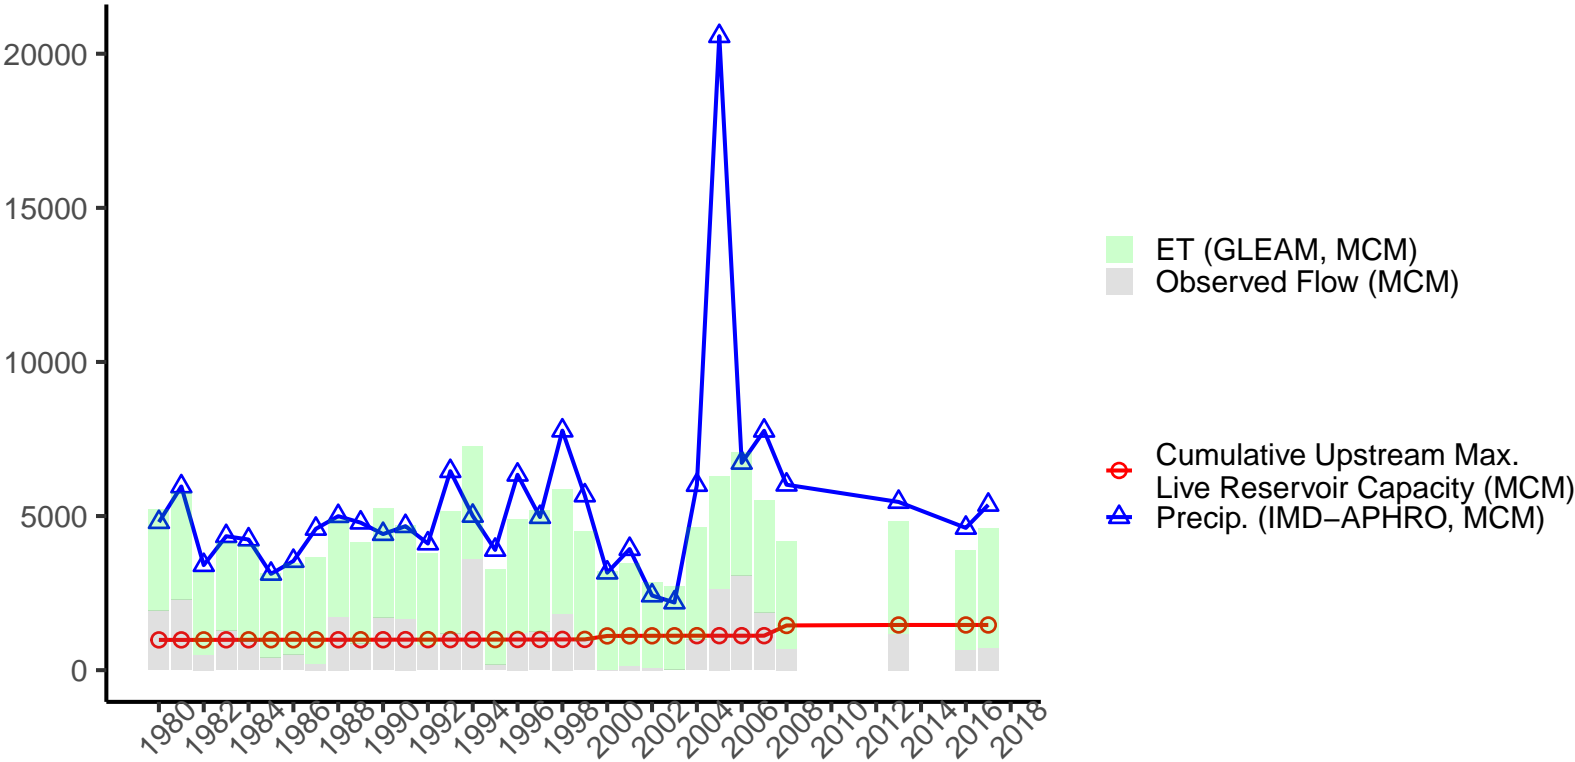

Station: Rampur, River: Mahanadi/Jonk  
GHI ID: maha\_rampu, Catch. Area: 3451 sq. km

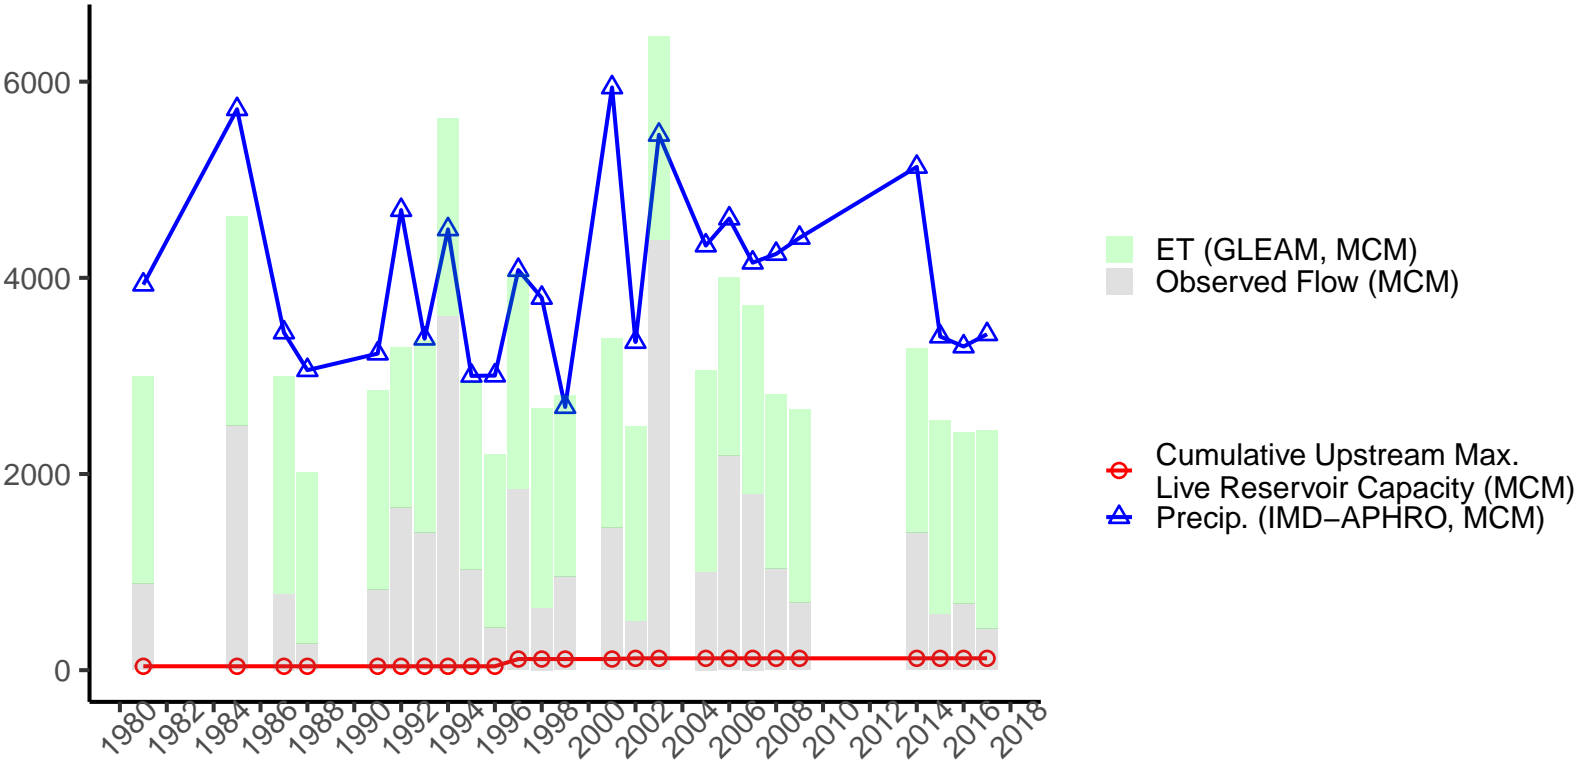



Station: Belkheri, River: Narmada/Sher  
GHI ID: narm\_belkh, Catch. Area: 1490 sq. km

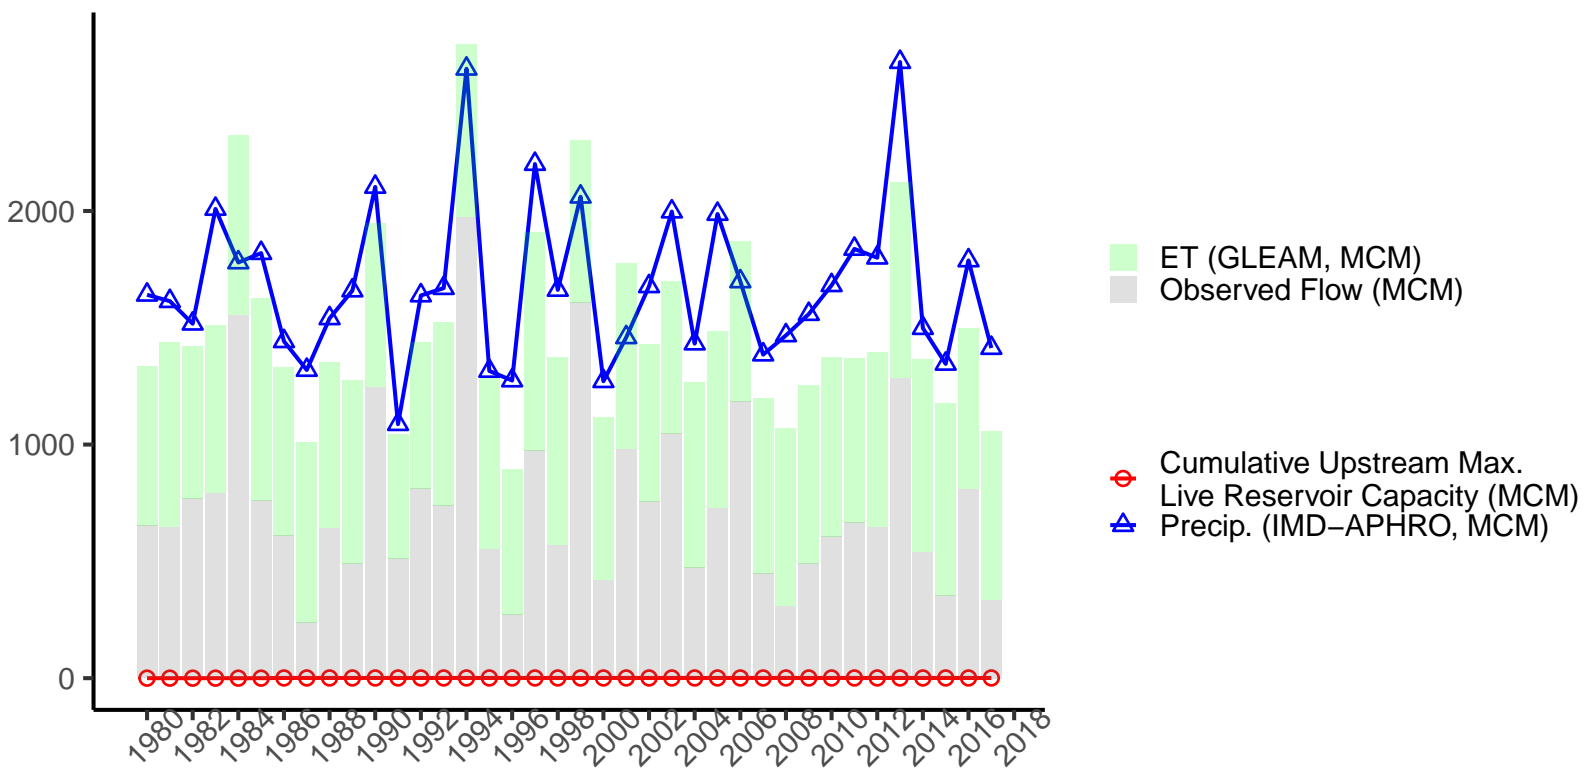

Station: Chhidgaon, River: Narmada/Ganjal  
GHI ID: narm\_chhid, Catch. Area: 1765 sq. km

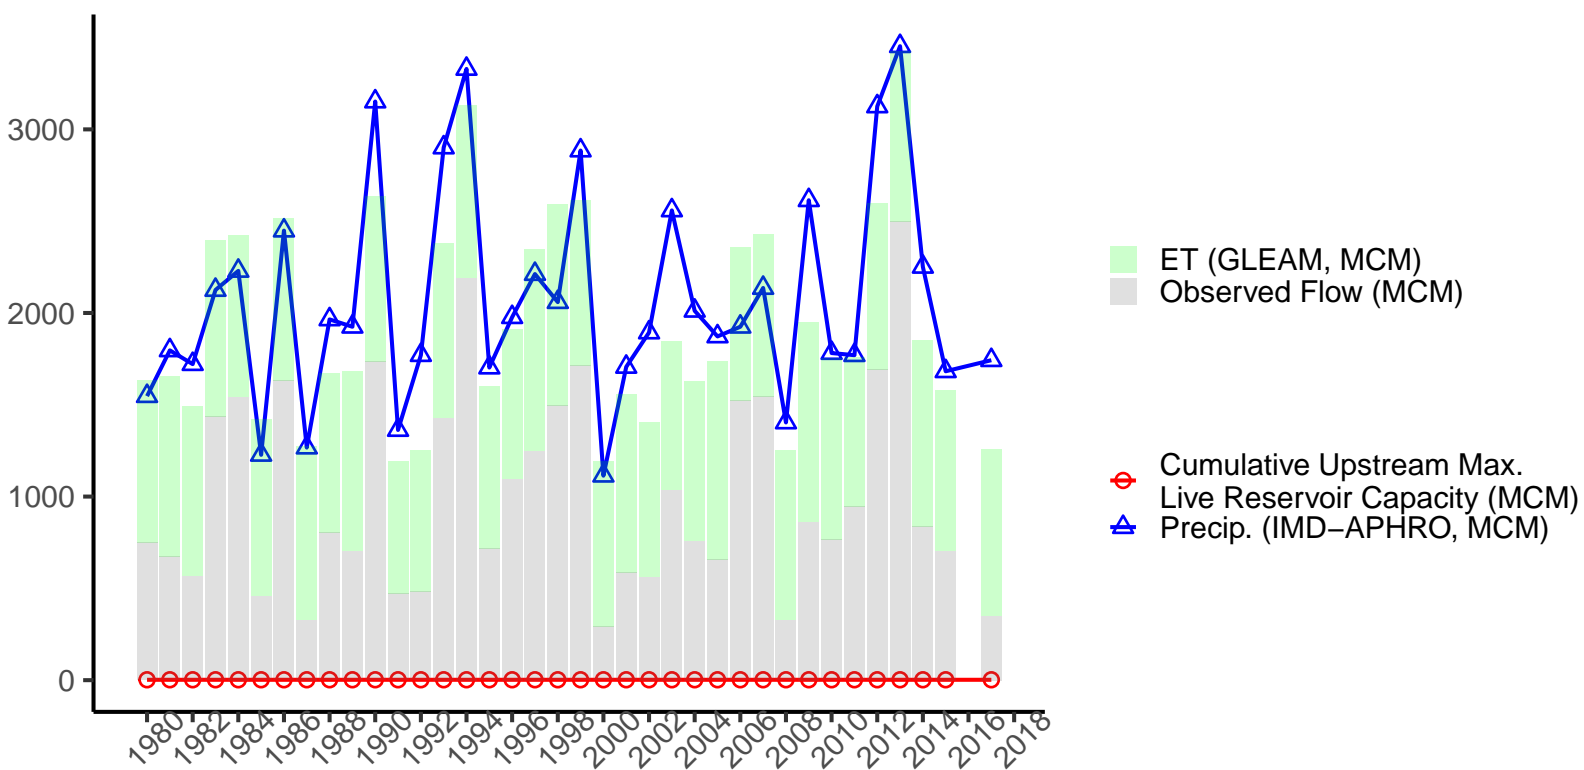

Station: Kogaon, River: Narmada/Kundi  
GHI ID: narm\_kogao, Catch. Area: 3934 sq. km

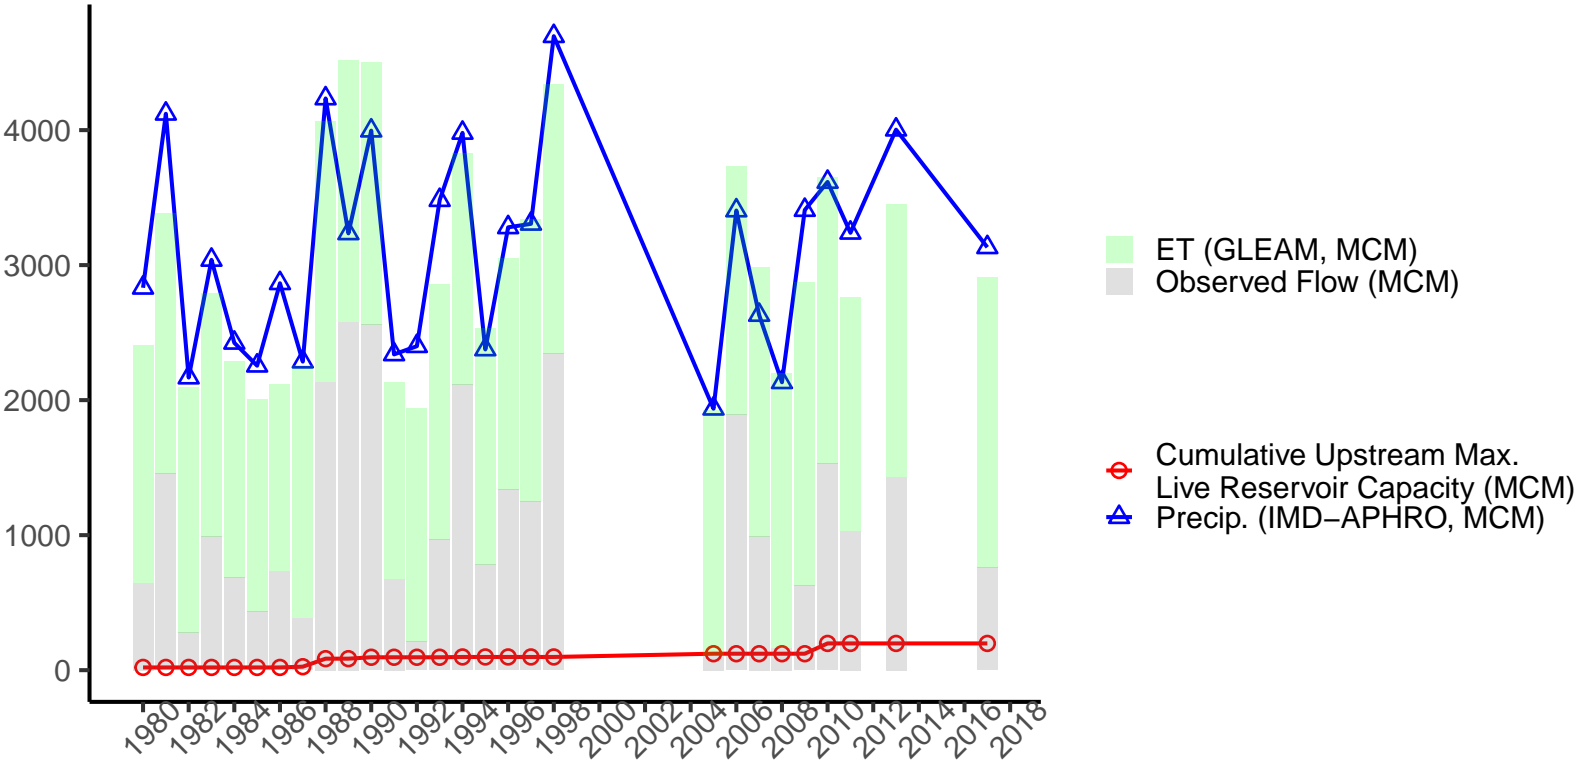

Station: Mohgaoan, River: Narmada/Burhner  
GHI ID: narm\_mohga, Catch. Area: 3998 sq. km

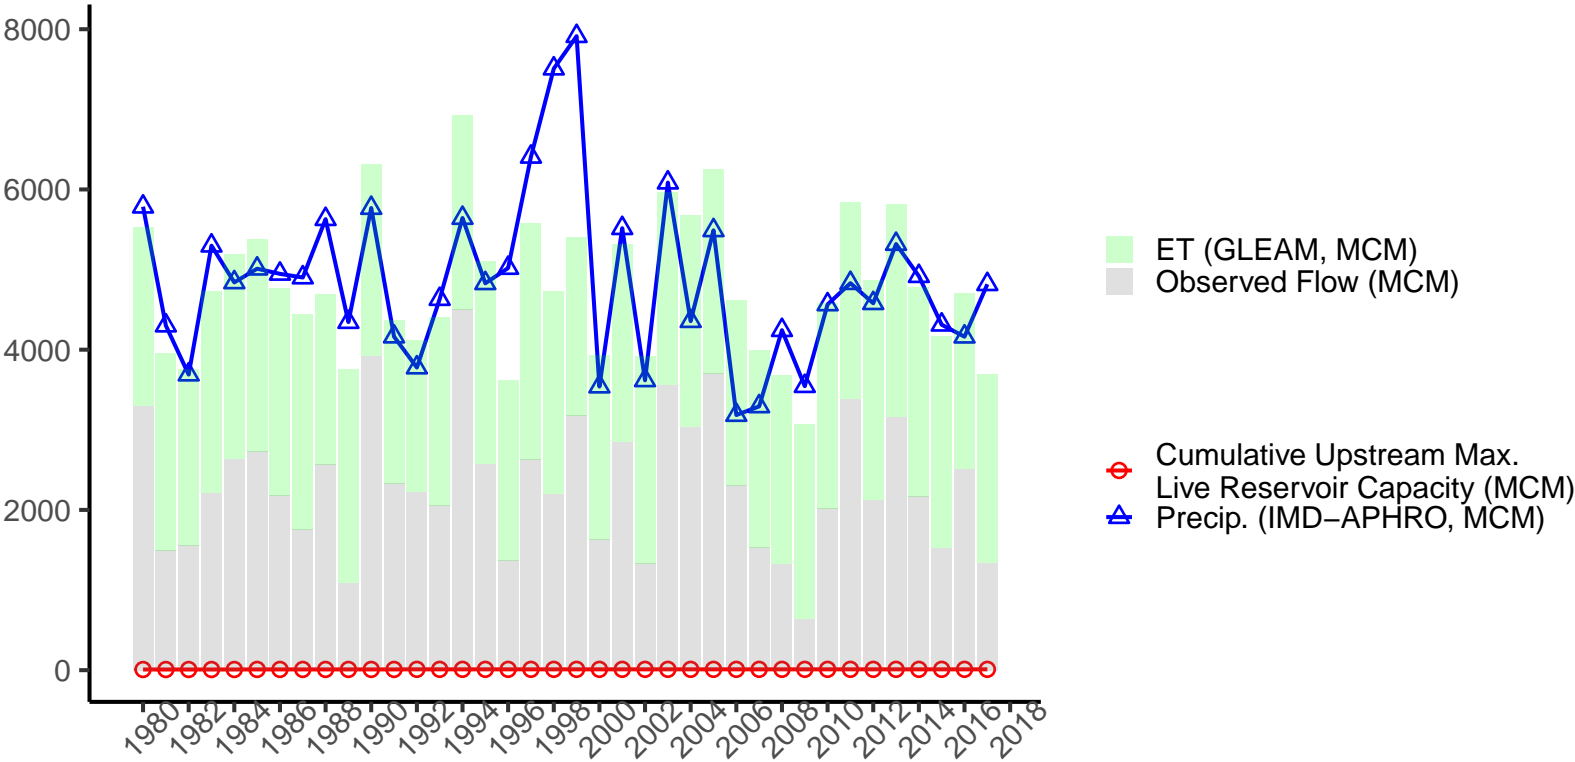

Station: Jamshedpur, River: Subarnarekha  
GHI ID: sube\_jams1, Catch. Area: 12785 sq. km

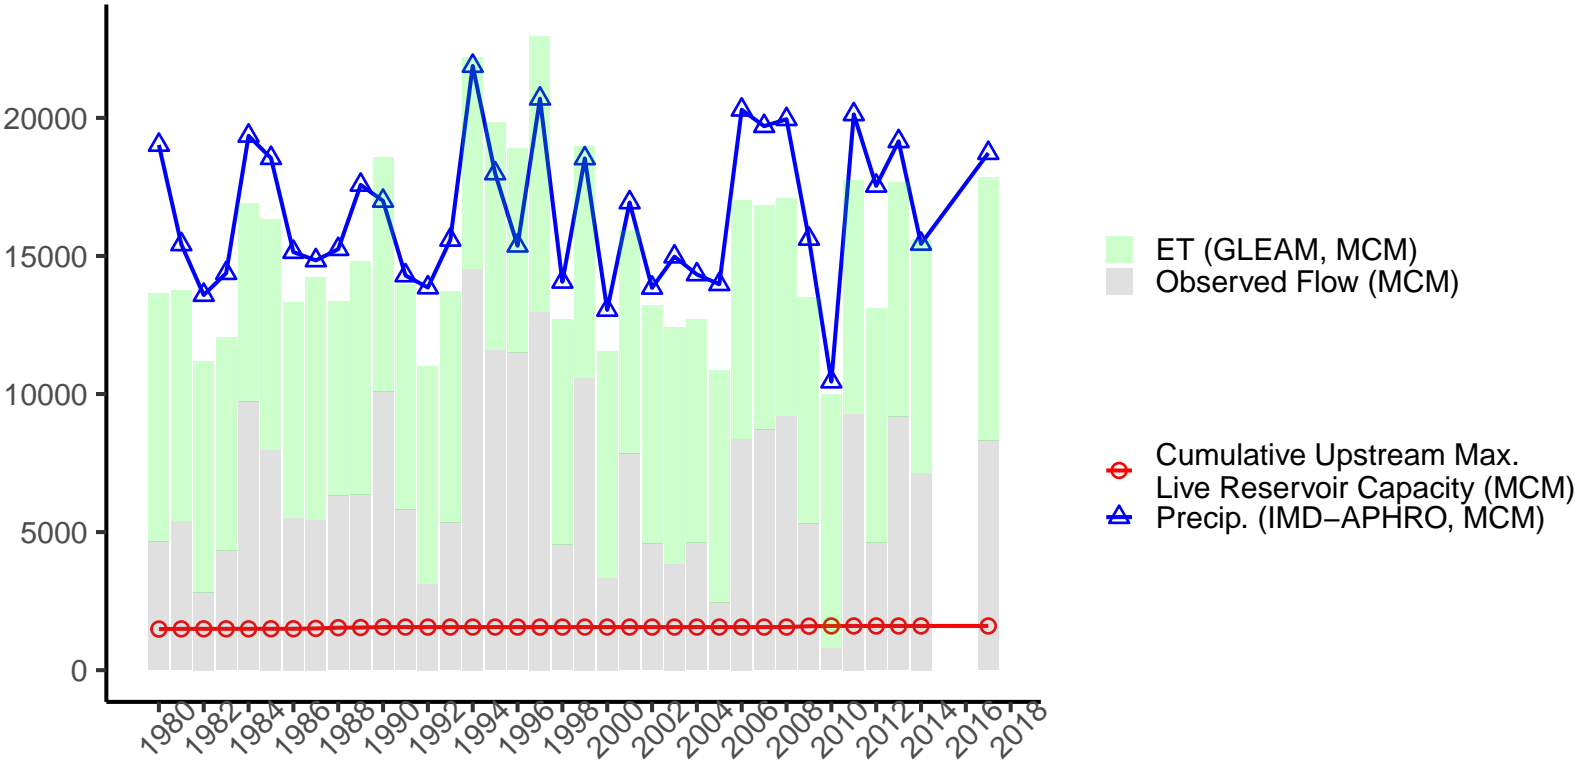

Station: Burhanpur, River: Tapi  
GHI ID: tapi\_burha, Catch. Area: 9070 sq. km

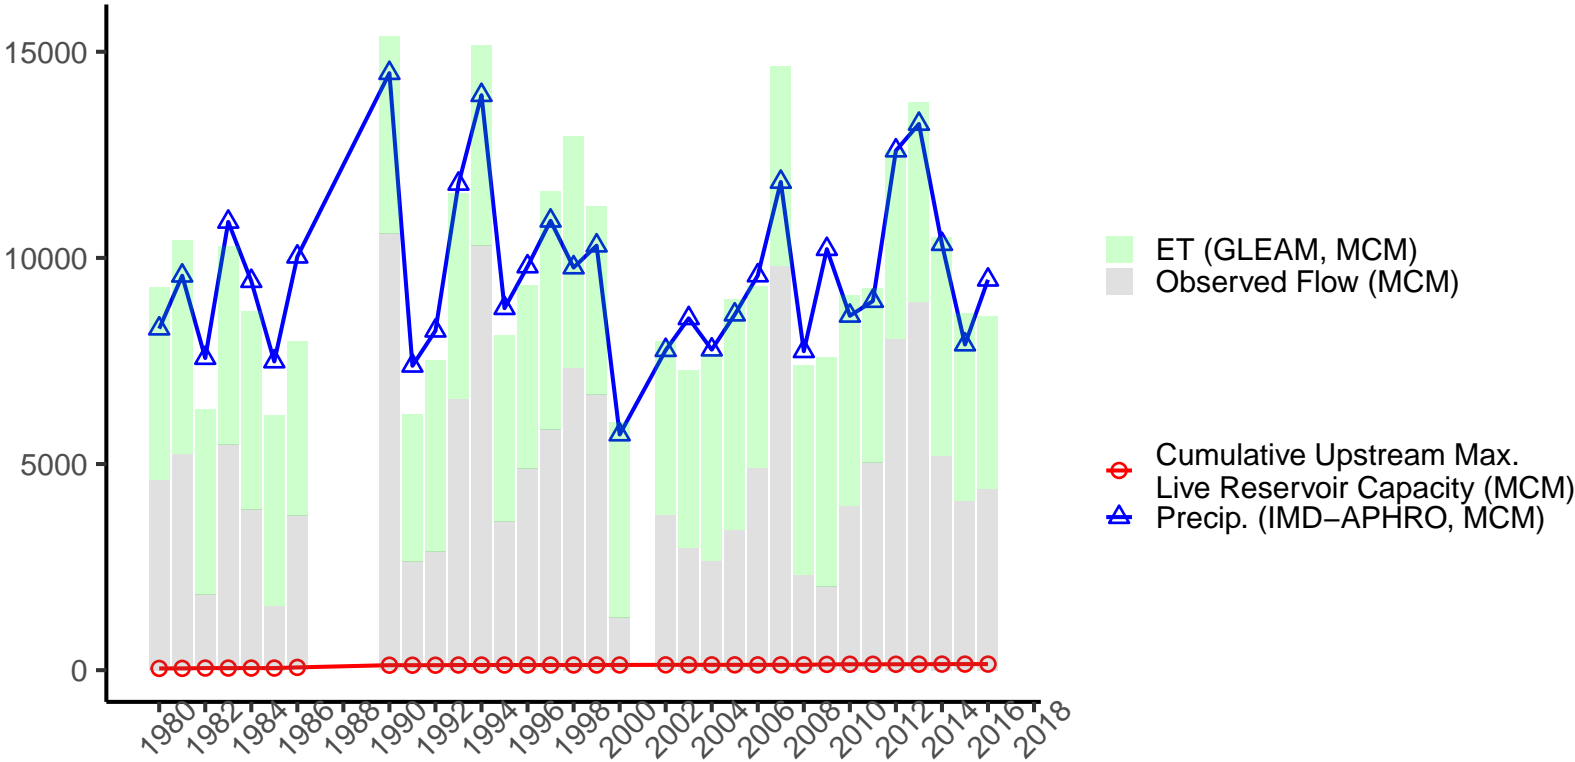

Station: Nanipalson, River: Damanganga  
GHI ID: wfrn\_nanip, Catch. Area: 763 sq. km

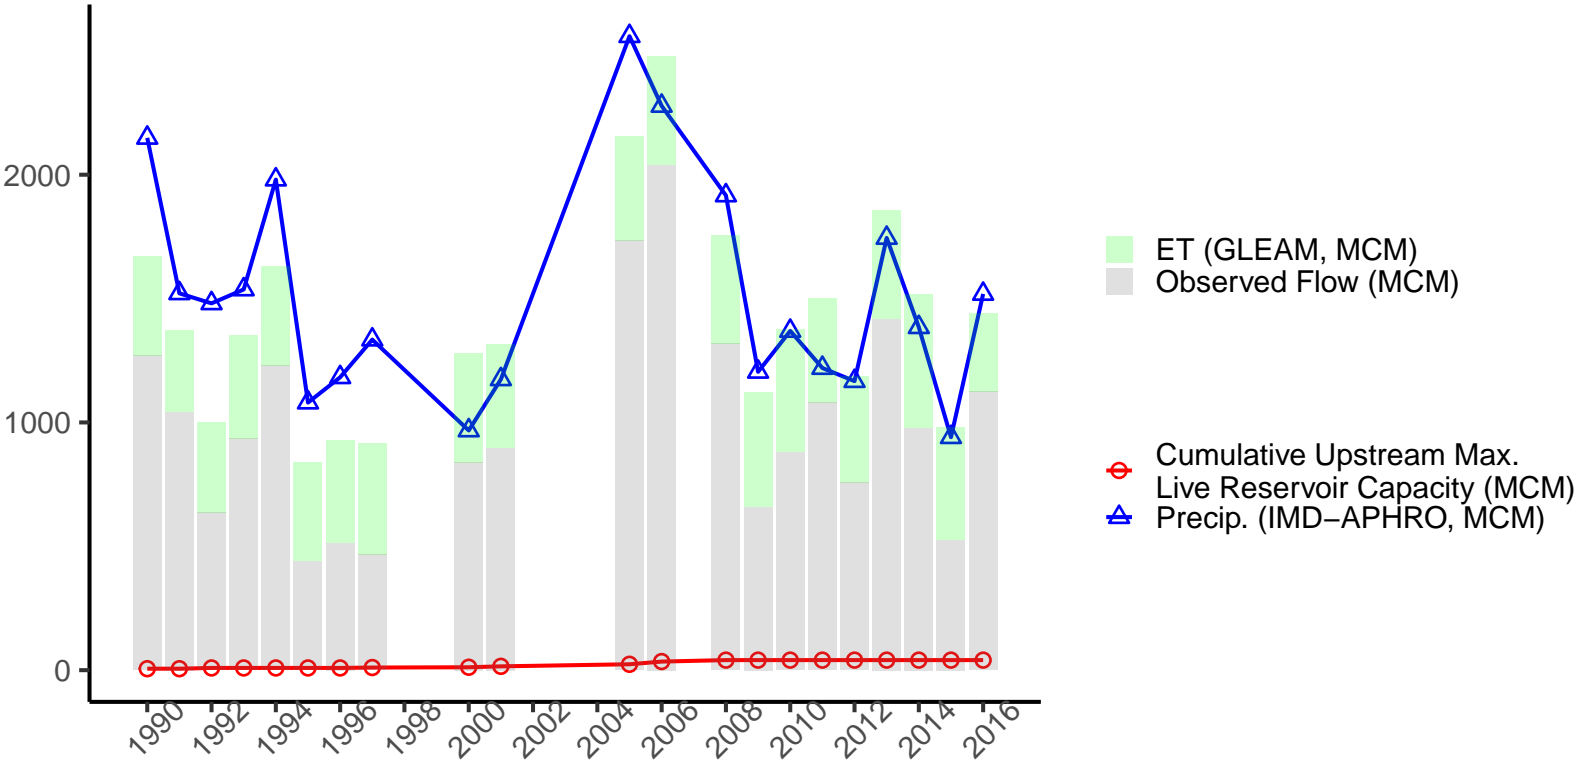

Station: Addoor, River: Gurupur  
GHI ID: wfrs\_addoo, Catch. Area: 719 sq. km

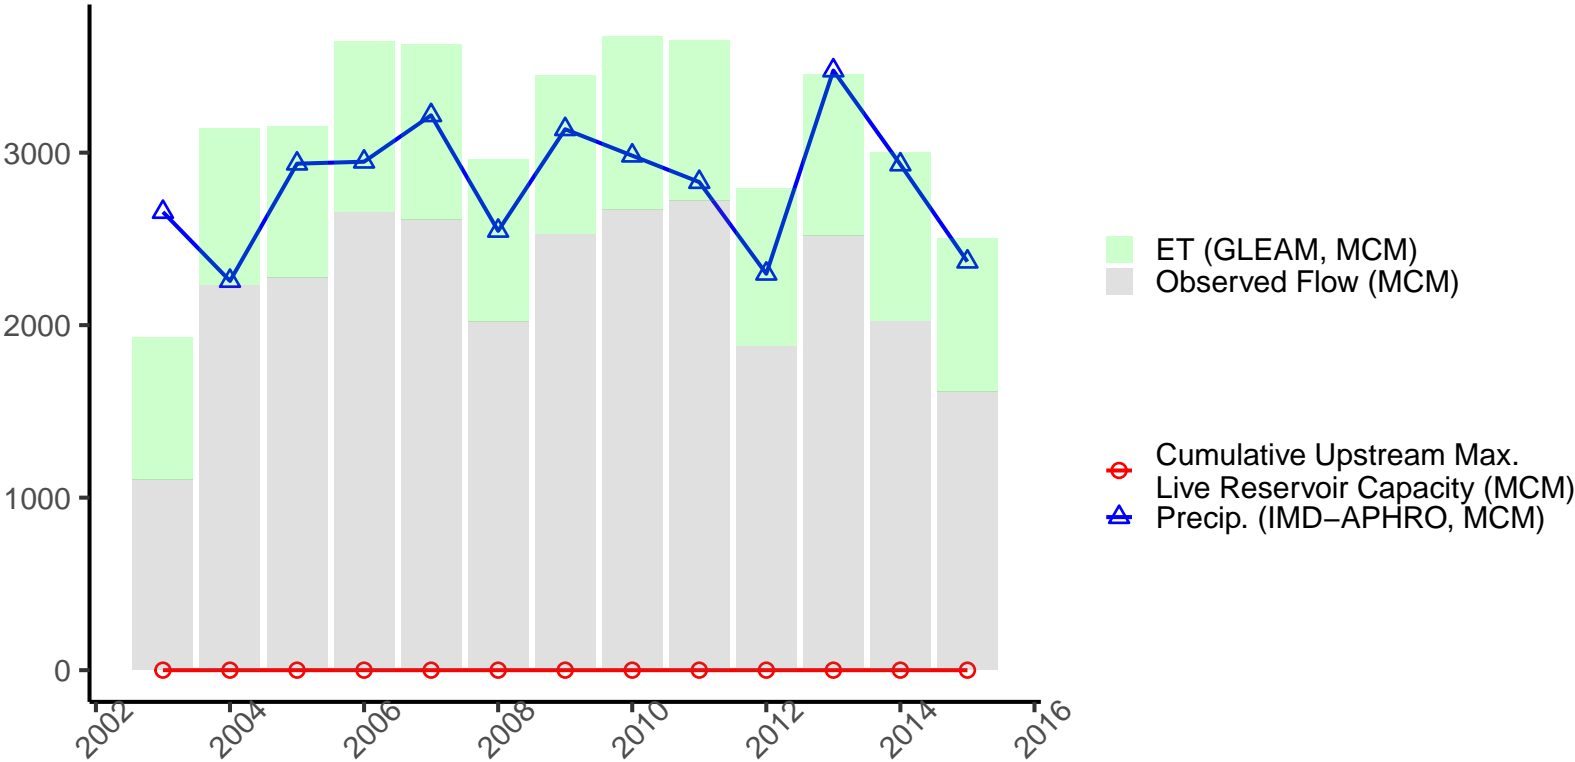



Station: Erinjipuzha, River: Payaswani  
GHI ID: wfrs\_erinj, Catch. Area: 912 sq. km

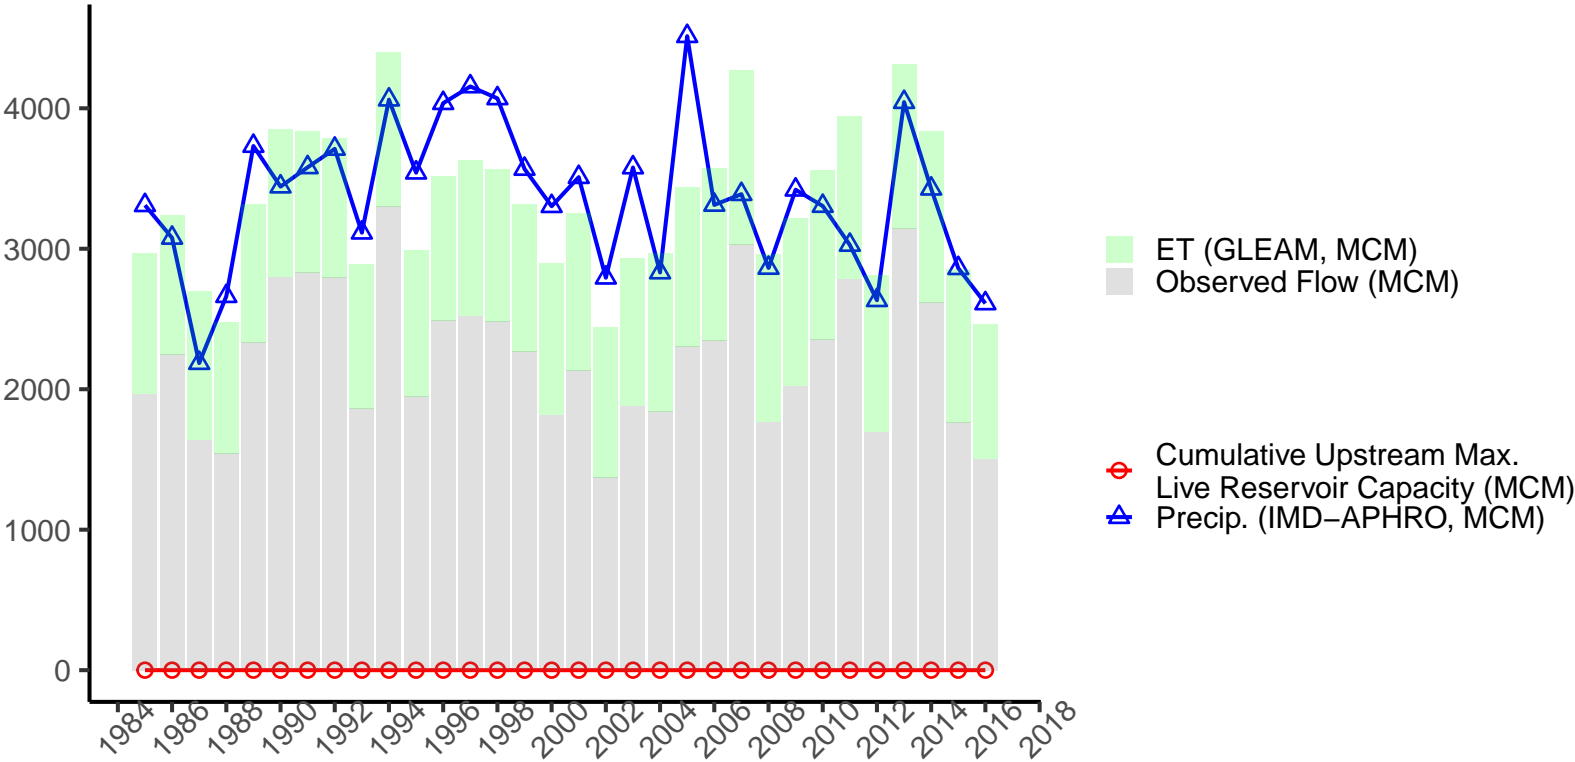

Station: Kumbidi, River: Bharathapuzha  
GHI ID: wfrs\_kumbi, Catch. Area: 5867 sq. km

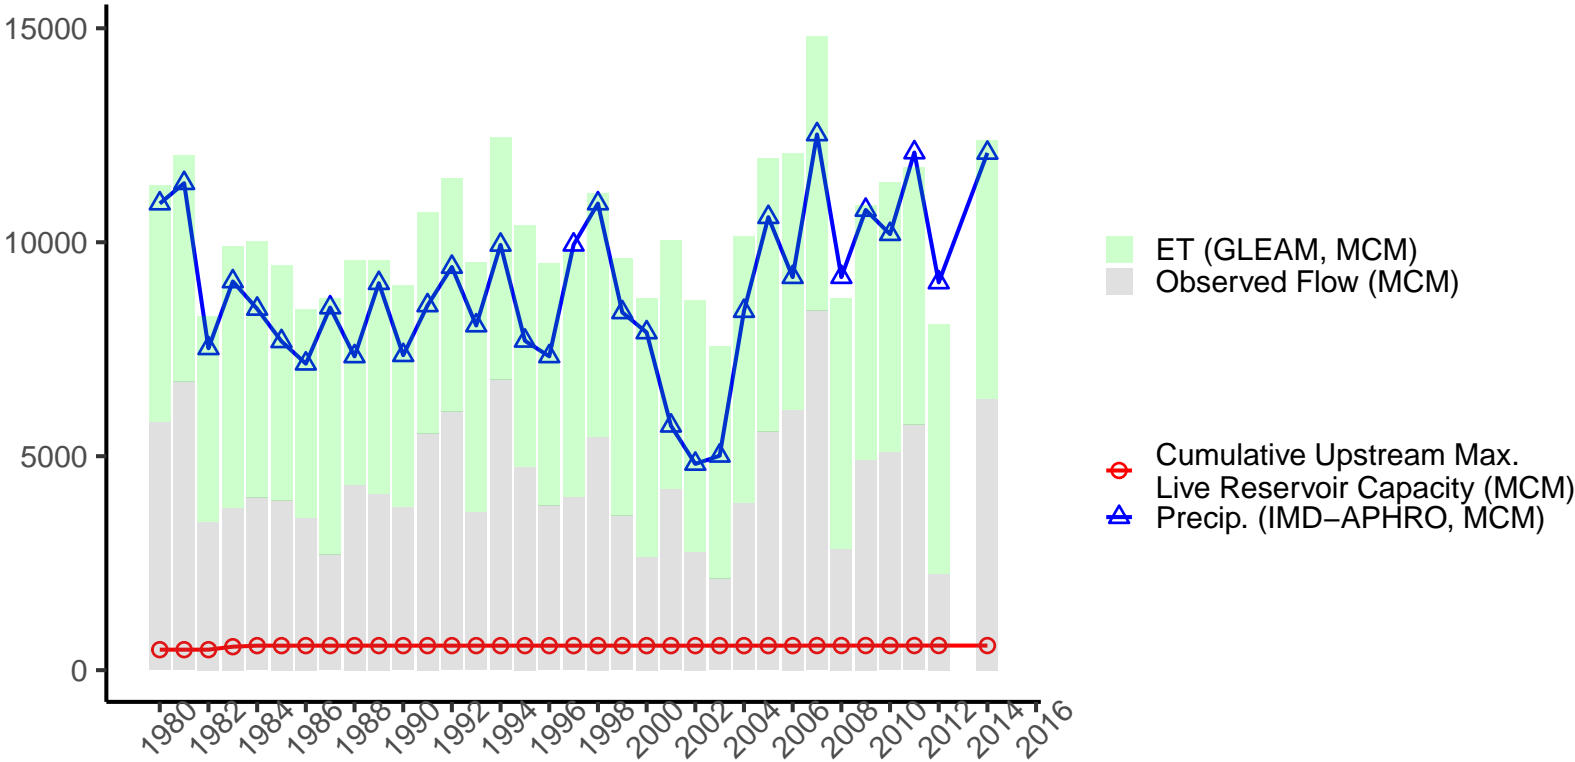

Station: Badar Pur Ghat, River: Barak  
GHI ID: gbmxbadar, Catch. Area: 25629 sq. km

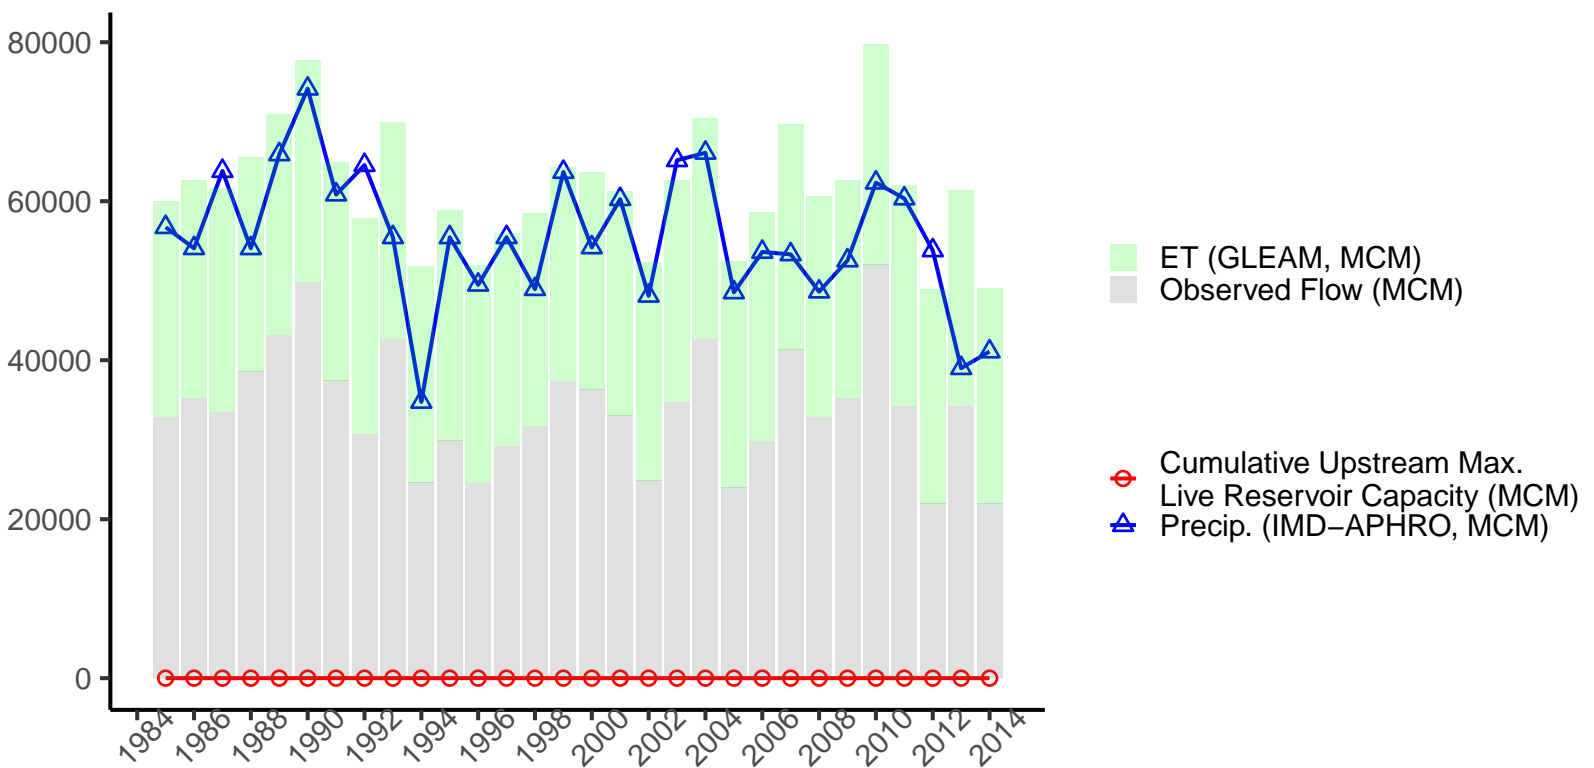

Station: Fulertal, River: Barak  
GHI ID: gbmxf\_fuler, Catch. Area: 15249 sq. km

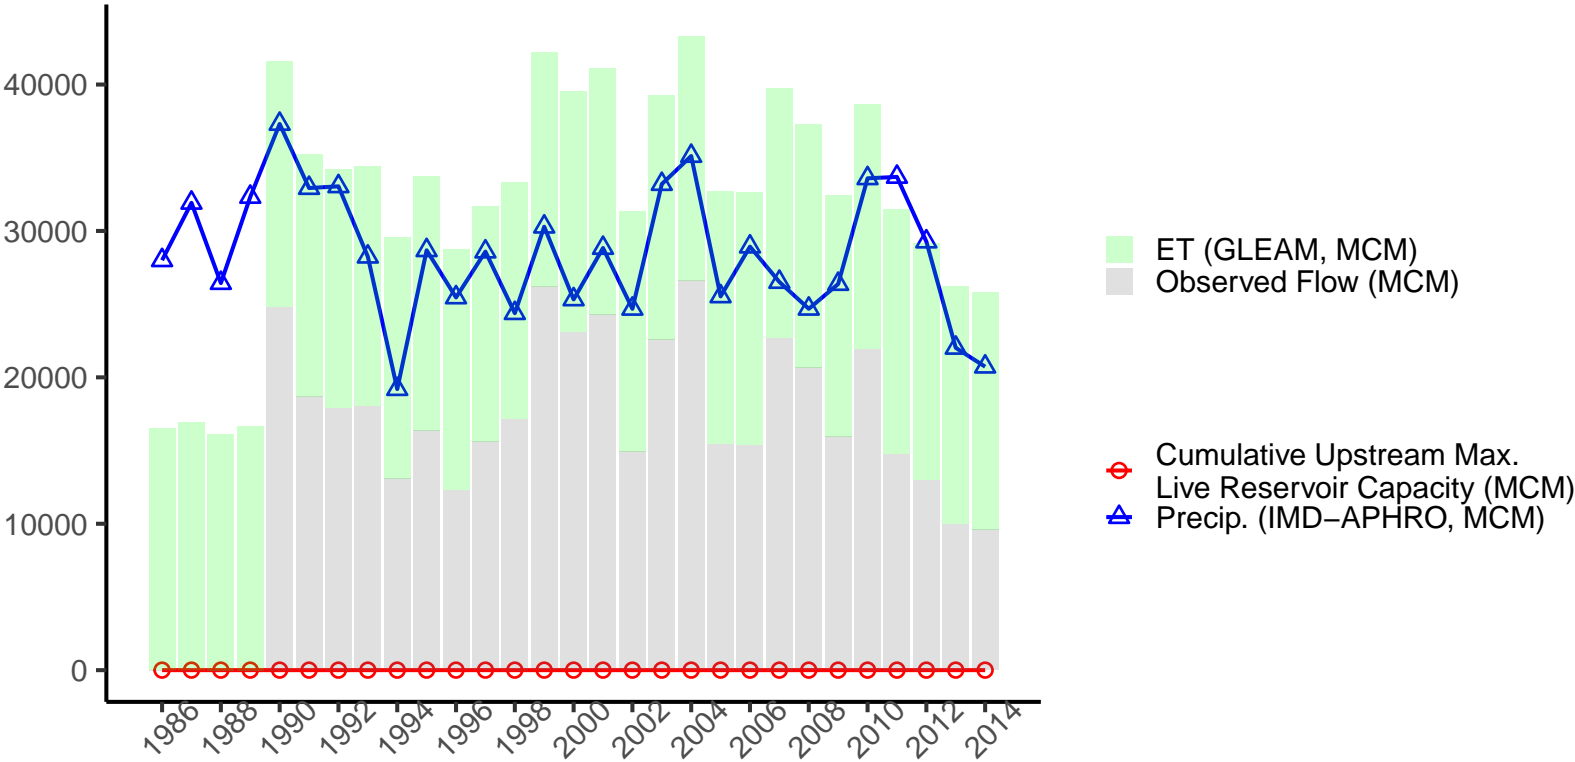

Station: Kailashahar, River: Manu  
GHI ID: gbm\_x\_kaila, Catch. Area: 2188 sq. km

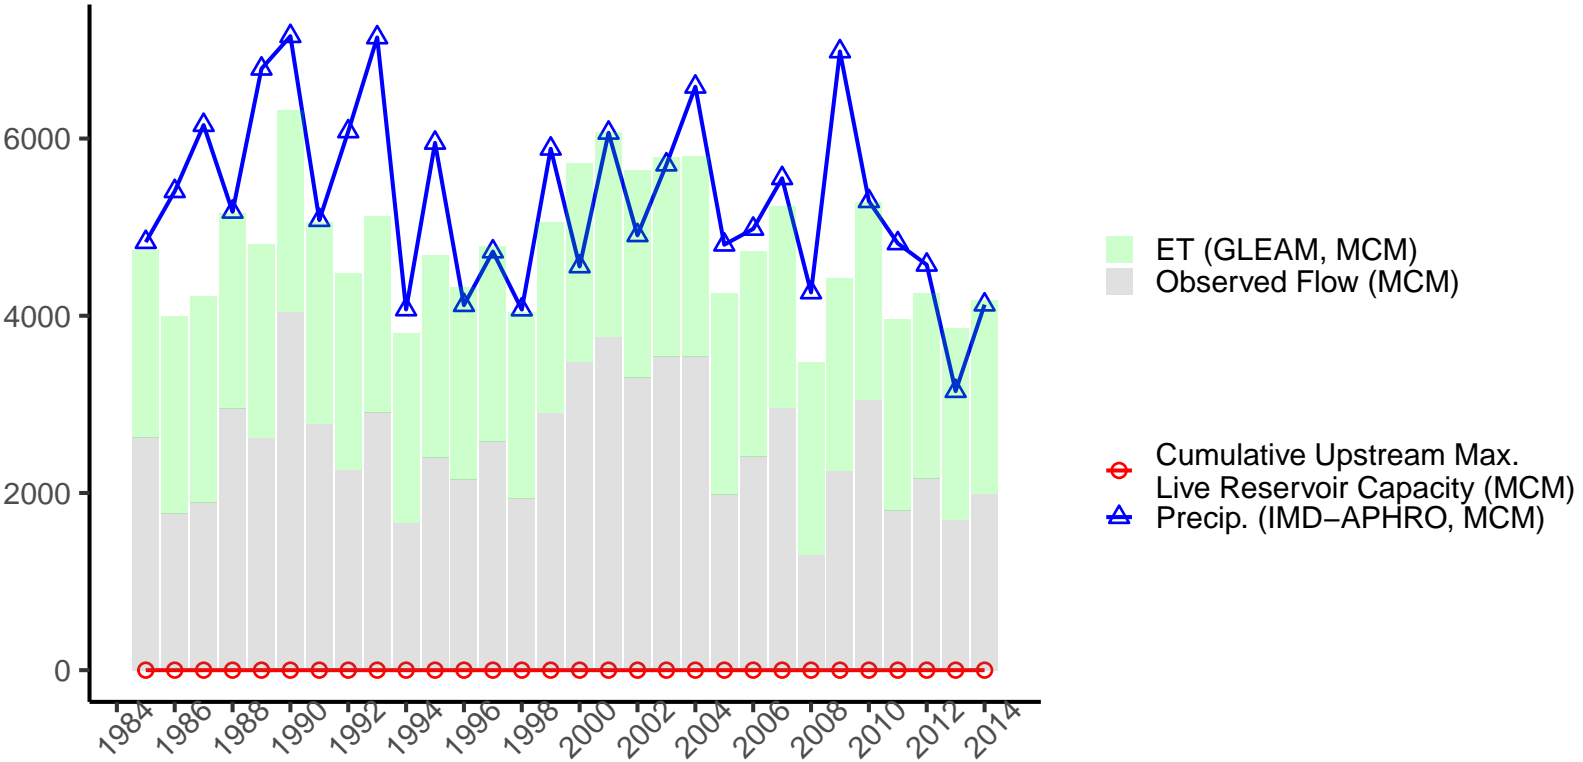

Supplement: Supplementary file 1 [file hess-2024-18-supplement.zip]
